# Supplementary material for: Improving the Utilization of STRmix™ Variance Parameters as Semi-Quantitative Profile Modeling Metrics
Source: Genes (Basel). 2022 Dec 29;14(1):102. doi: 10.3390/genes14010102 (PMC9859078; doi:10.3390/genes14010102)
Supplement: Supplementary file 1 [file genes-14-00102-s001.zip]

Archive with 4 entries (4 files):
- Figure S1 and Table S3 (Regression Analysis).pdf
- Figure S2 (EPG).pdf
- Table S1 (STRmix Data).xlsx
- Table S2 (Profiles).xlsx
