# Supplementary material for: Improving the Utilization of STRmix™ Variance Parameters as Semi-Quantitative Profile Modeling Metrics
Source: Genes (Basel). 2022 Dec 29;14(1):102. doi: 10.3390/genes14010102 (PMC9859078; doi:10.3390/genes14010102)
Supplement: Supplementary file 1 [file genes-14-00102-s001.zip › Figure S1 and Table S3 (Regression Analysis).pdf]

### Supplementary Figure S1

4<sup>th</sup>-order polynomial regressions of the entire unchallenged data set (2096 samples combining all contributor numbers), including 2-sided 99% confidence intervals, for allele variances (a), reverse stutter variances (b), and forward stutter variances (c). Standard Errors for the Y estimate were calculated in Excel 2016 using the LINEST formula.

(a)

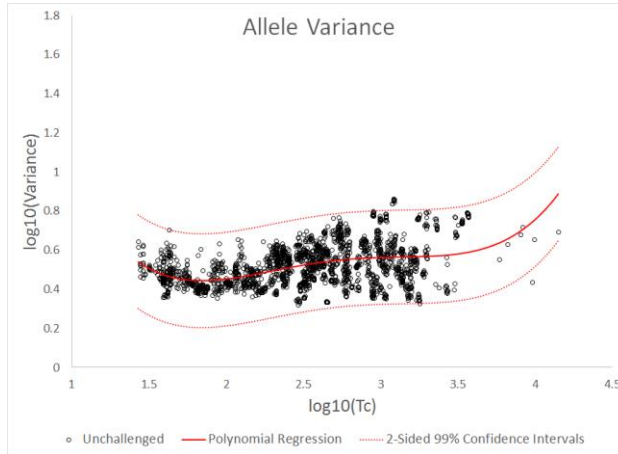

(b)

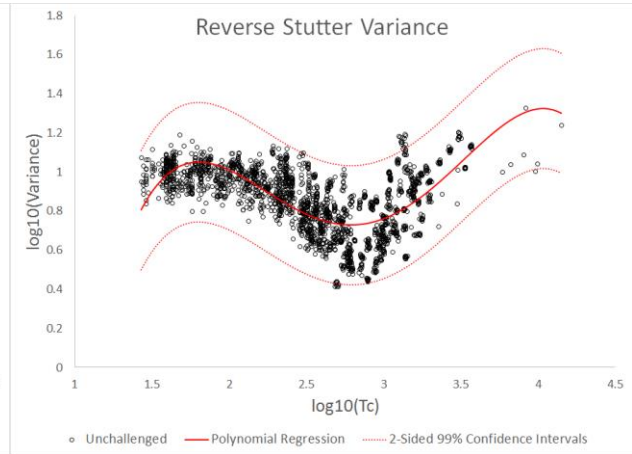

(c)

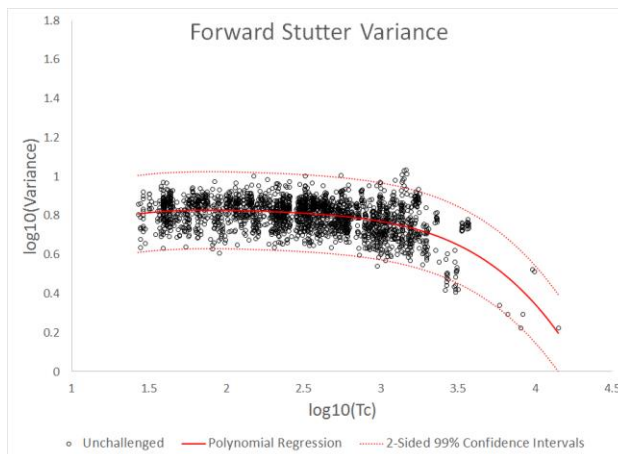

### Supplementary Table S3

The overall regression and the individual coefficients were evaluated to see if the variances were significantly better explained by the 4<sup>th</sup>-order polynomial regression than by a simple straight line with a slope of 0. The general regression line formula is  $y = \sum_{i=0}^4 \beta_i x^i$ , where  $\beta_{i>0}$  are analogous to the slopes of a straight line formula, and  $\beta_0$  is analogous to the  $y$  – *intercept*. The independent variables ( $x$ ) were the  $\log_{10}(Tc)$  values. The dependent variables ( $y$ ) were the  $\log_{10}(\text{variance})$  values. All calculations were performed in Excel 2016. The  $\beta_i$  regression coefficients and  $F$  statistic were calculated using the LINEST formula.  $F$  statistics for the overall regressions were significant ( $P < 0.01$ ) for all three variances.  $T$  statistics for all allele variance and reverse stutter variance coefficients were significant ( $P < 0.01$ ), and the 99% 2-sided confidence intervals (CIs) for those coefficients never included 0 (analogous to a slope of 0 for  $\beta_{i>0}$ ). For the forward stutter regression, only  $\beta_4$  was significant ( $P < 0.01$ ), and it was the only coefficient with a 99% confidence interval that did not include 0. These results are consistent with the sample data in Supplemental Figure S1c, where the variance data visually appears uncorrelated with  $Tc$  until  $\log_{10}(Tc) > 3$ .

|                                                | Allele                                                     | Reverse Stutter                                             | Forward Stutter                                            |
|------------------------------------------------|------------------------------------------------------------|-------------------------------------------------------------|------------------------------------------------------------|
| Polynomial regression formula                  | $y = 0.1122x^4 - 1.2206x^3 + 4.8535x^2 - 8.2618x + 5.5312$ | $y = -0.2892x^4 + 3.3258x^3 - 13.619x^2 + 23.456x - 13.404$ | $y = -0.0348x^4 + 0.313x^3 - 1.0891x^2 + 1.7016x - 0.1678$ |
| $R^2$                                          | 0.1879                                                     | 0.4774                                                      | 0.2426                                                     |
| $F$ statistic $P$ value                        | 5.9926E-93                                                 | 1.1307E-292                                                 | 1.6337E-124                                                |
| $\beta_4$<br>99% CI<br>$T$ statistic $P$ value | 0.1122<br>0.0760 to 0.1485<br>2.3433E-15                   | -0.2892<br>-0.3355 to -0.2429<br>4.5747E-55                 | -0.0348<br>-0.0647 to -0.0049<br>0.0027634                 |
| $\beta_3$<br>99% CI<br>$T$ statistic $P$ value | -1.2206<br>-1.6043 to -0.8369<br>4.0674E-16                | 3.3258<br>2.8357 to 3.8160<br>4.7026E-64                    | 0.3130<br>-0.0035 to 0.6294<br>0.010849                    |
| $\beta_2$<br>99% CI<br>$T$ statistic $P$ value | 4.8535<br>3.3645 to 6.3426<br>7.8857E-17                   | -13.6193<br>-15.5216 to -11.7169<br>1.3621E-70              | -1.0891<br>-2.3172 to 0.1391<br>0.022342                   |
| $\beta_1$<br>99% CI<br>$T$ statistic $P$ value | -8.2618<br>-10.7675 to -5.7561<br>3.5300E-17               | 23.4557<br>20.2544 to 26.6570<br>1.3129E-73                 | 1.7016<br>-0.3651 to 3.7684<br>0.0338971                   |
| $\beta_0$<br>99% CI<br>$T$ statistic $P$ value | 5.5312<br>3.9926 to 7.0698<br>4.5521E-20                   | -13.4045<br>-15.3702 to -11.4388<br>1.2273E-64              | -0.1678<br>-1.4368 to 1.1013<br>0.7332772                  |
