# Supplementary material for: Improving the Utilization of STRmix™ Variance Parameters as Semi-Quantitative Profile Modeling Metrics
Source: Genes (Basel). 2022 Dec 29;14(1):102. doi: 10.3390/genes14010102 (PMC9859078; doi:10.3390/genes14010102)
Supplement: Supplementary file 1 [file genes-14-00102-s001.zip › Table S1 (STRmix Data).xlsx]

## Sheet: Unchallenged
STRmix version	Sample ID	NoC	Total iterations	ESS	Average loglik.	Gelman Rubin	DNA amount 1	DNA amount 2	DNA amount 3	DNA amount 4	Mixture proportion 1	Mixture proportion 2	Mixture proportion 3	Mixture proportion 4	Kit 1 post. allelic variance	Kit 1 gen.stutter 1 name	Kit 1 gen.stutter 1 post. variance	Kit 1 gen.stutter 2 name	Kit 1 gen.stutter 2 post. variance	Kit 1 deg starting	Kit 1 post. deg. lin. appr. 1	Kit 1 post. deg. lin. appr. 2	Kit 1 post. deg. lin. appr. 3	Kit 1 post. deg. lin. appr. 4	Kit 1 post. deg. d param. 1	Kit 1 post. deg. d param. 2	Kit 1 post. deg. d param. 3	Kit 1 post. deg. d param. 4
2.8.0	1-1_25pg_Set 2_rep-108730	2	1548652	857.239	-3.94468	1.06428	39	21			64.9808	35.0192			3.30069	Back Stutter	7.34726	Forward Stutter	6.3807	89	0.0920975	0.0401152			0.00324595	0.00252206
2.8.0	1-1_25pg_Set 2_rep-130673	2	1634585	1169.39	-3.76128	1.09828	41	21			65.7683	34.2317			3.62722	Back Stutter	8.0881	Forward Stutter	5.18338	89	0.0860279	0.0481434			0.00281152	0.00304231
2.8.0	1-1_25pg_Set 2_rep-337503	2	1604611	1941.69	-3.47294	1.15279	39	20			65.9365	34.0635			3.76395	Back Stutter	9.32253	Forward Stutter	6.22136	89	0.0691659	0.047788			0.0022115	0.00355134
2.8.0	1-1_25pg_Set 2_rep-368285	2	1836677	1541.14	-3.8	1.25878	36	19			65.425	34.575			3.53122	Back Stutter	8.71078	Forward Stutter	6.61924	89	0.0701418	0.0459783			0.00251533	0.00330637
2.8.0	1-1_25pg_Set 2_rep-462701	2	1647376	1441.48	-3.76363	1.16593	37	19			66.3072	33.6928			3.20832	Back Stutter	10.8919	Forward Stutter	6.34181	89	0.0646528	0.0385748			0.00219393	0.0028586
2.8.0	1-1_25pg_Set 2_rep-583957	2	1492137	1307.08	-3.78313	1.0969	40	20			66.7545	33.2455			3.61143	Back Stutter	11.021	Forward Stutter	6.04632	89	0.0795507	0.0507752			0.00259072	0.00410403
2.8.0	1-1_25pg_Set 2_rep-660673	2	1621764	703.997	-3.56043	1.12396	40	20			66.3961	33.6039			3.48389	Back Stutter	10.5515	Forward Stutter	6.0677	89	0.0843731	0.0419604			0.00285177	0.00307387
2.8.0	1-1_25pg_Set 2_rep-847668	2	1530338	1266.58	-3.97894	1.1175	37	20			65.4408	34.5592			3.24316	Back Stutter	9.9673	Forward Stutter	6.89884	89	0.0745513	0.0434239			0.00260378	0.00331623
2.8.0	1-1_25pg_Set 2_rep-974442	2	1461020	1344.76	-4.07578	1.14025	38	19			66.8539	33.1461			3.8574	Back Stutter	9.8084	Forward Stutter	5.06563	89	0.0829499	0.0398084			0.00292575	0.00281035
2.8.0	1-1_25pg_Set 2_rep-994985	2	1677576	1445.33	-3.80747	1.03811	39	20			65.8986	34.1014			3.4443	Back Stutter	8.84169	Forward Stutter	6.80394	89	0.0646934	0.0452136			0.00203246	0.00309048
2.8.0	1-1_50pg_Set 2_rep-108730	2	2537774	8879.04	2.64337	1.08851	51	35			59.2747	40.7253			2.89152	Back Stutter	9.95676	Forward Stutter	6.35385	97	0.118792	0.0507572			0.00315595	0.00170775
2.8.0	1-1_50pg_Set 2_rep-130673	2	2458738	7753.11	2.38457	1.06661	50	35			59.1155	40.8845			2.83944	Back Stutter	8.07491	Forward Stutter	5.00356	97	0.107255	0.0484876			0.00281469	0.00164936
2.8.0	1-1_50pg_Set 2_rep-337503	2	2618440	7212.78	3.16403	1.09352	51	35			59.0162	40.9838			2.8634	Back Stutter	13.5238	Forward Stutter	5.49189	97	0.104244	0.0460462			0.00266689	0.00152155
2.8.0	1-1_50pg_Set 2_rep-368285	2	2961995	6599.21	3.3436	1.20523	47	33			58.6372	41.3628			2.68022	Back Stutter	7.57839	Forward Stutter	5.98505	97	0.0864168	0.0489005			0.0023238	0.00180791
2.8.0	1-1_50pg_Set 2_rep-462701	2	2433469	8211.57	3.27994	1.16515	49	34			58.6792	41.3208			2.53859	Back Stutter	8.0655	Forward Stutter	6.70524	97	0.10954	0.0540328			0.0030092	0.00192873
2.8.0	1-1_50pg_Set 2_rep-583957	2	2400154	6628.93	2.39258	1.07333	53	37			59.279	40.721			2.4584	Back Stutter	7.713	Forward Stutter	5.45178	97	0.140378	0.0516812			0.00379595	0.00165876
2.8.0	1-1_50pg_Set 2_rep-660673	2	2287905	6732.28	2.61733	1.087	51	35			59.6627	40.3373			2.93864	Back Stutter	10.0082	Forward Stutter	6.73943	97	0.129579	0.050133			0.00352505	0.00171113
2.8.0	1-1_50pg_Set 2_rep-847668	2	2355421	6587.28	1.97207	1.04723	52	35			59.8239	40.1761			2.88112	Back Stutter	8.39012	Forward Stutter	5.44987	97	0.135179	0.0472705			0.00368184	0.00159735
2.8.0	1-1_50pg_Set 2_rep-974442	2	3051559	6962.98	2.82152	1.32216	48	34			58.7264	41.2736			2.54587	Back Stutter	8.52212	Forward Stutter	4.86952	97	0.103206	0.0516742			0.00285665	0.00184082
2.8.0	1-1_50pg_Set 2_rep-994985	2	2356905	9661.23	2.40568	1.05736	50	35			59.1926	40.8074			2.69921	Back Stutter	9.2865	Forward Stutter	6.09576	97	0.111173	0.0551874			0.00297466	0.00192696
2.8.0	1-1_100pg_Set 2_rep-108730	2	3944885	11882	12.3795	1.05504	88	66			57.259	42.741			2.25858	Back Stutter	8.29816	Forward Stutter	6.21198	90	0.190206	0.0898874			0.00282647	0.00159961
2.8.0	1-1_100pg_Set 2_rep-130673	2	3833728	14806.8	12.2754	1.05621	87	64			57.4913	42.5087			2.43138	Back Stutter	8.7494	Forward Stutter	5.3834	90	0.185051	0.0817471			0.00279784	0.00146698
2.8.0	1-1_100pg_Set 2_rep-337503	2	4030627	12807.4	12.8564	1.05587	91	67			57.5741	42.4259			2.53795	Back Stutter	6.77752	Forward Stutter	8.51773	90	0.194544	0.086801			0.00280538	0.00150998
2.8.0	1-1_100pg_Set 2_rep-368285	2	3996399	8185.26	12.145	1.02144	84	62			57.3835	42.6165			2.39646	Back Stutter	7.92266	Forward Stutter	9.38123	90	0.160447	0.0691606			0.00240294	0.00125029
2.8.0	1-1_100pg_Set 2_rep-462701	2	3879975	9113.89	13.3312	1.0296	91	67			57.6246	42.3754			2.54518	Back Stutter	9.96397	Forward Stutter	6.41219	90	0.206581	0.0957542			0.00300795	0.00166843
2.8.0	1-1_100pg_Set 2_rep-583957	2	3850058	20158.5	13.0859	1.11275	90	65			57.8388	42.1612			2.37484	Back Stutter	10.2432	Forward Stutter	6.28482	90	0.197771	0.0867883			0.00291651	0.00153857
2.8.0	1-1_100pg_Set 2_rep-660673	2	4069000	12608.4	11.7786	1.0955	88	66			56.9718	43.0282			2.6674	Back Stutter	8.20912	Forward Stutter	7.18943	90	0.174725	0.079809			0.00254202	0.00137996
2.8.0	1-1_100pg_Set 2_rep-847668	2	3821356	11939.8	11.7824	1.0736	82	61			57.4563	42.5437			2.3339	Back Stutter	9.12709	Forward Stutter	4.26291	90	0.173096	0.0761997			0.00273822	0.00143974
2.8.0	1-1_100pg_Set 2_rep-974442	2	4053929	14775.3	11.5285	1.04938	88	66			57.1947	42.8053			2.55488	Back Stutter	7.53407	Forward Stutter	6.21652	90	0.173345	0.0756175			0.00252694	0.00131198
2.8.0	1-1_100pg_Set 2_rep-994985	2	4084739	18500.2	12.4357	1.07512	85	63			57.2466	42.7534			2.44231	Back Stutter	9.61944	Forward Stutter	6.713	90	0.160227	0.069076			0.00238187	0.00123408
2.8.0	1-1_200pg_Set 2_rep-108730	2	4117118	10672.2	27.0197	1.11582	256	218			53.9949	46.0051			3.61923	Back Stutter	6.19568	Forward Stutter	5.54705	89	0.378684	0.25652			0.00176519	0.00133847
2.8.0	1-1_200pg_Set 2_rep-130673	2	4037232	8755.89	27.9817	1.10028	257	219			54.039	45.961			3.50137	Back Stutter	10.3861	Forward Stutter	5.5372	89	0.363981	0.243588			0.00166479	0.0012587
2.8.0	1-1_200pg_Set 2_rep-337503	2	3989298	7243.51	28.1151	1.02794	256	216			54.2002	45.7998			3.45876	Back Stutter	6.43382	Forward Stutter	5.52363	89	0.385241	0.238274			0.00179926	0.00124844
2.8.0	1-1_200pg_Set 2_rep-368285	2	3601618	6247.01	27.8525	1.01476	265	221			54.5656	45.4344			3.44292	Back Stutter	7.34013	Forward Stutter	4.92814	89	0.459732	0.230424			0.00212929	0.0011698
2.8.0	1-1_200pg_Set 2_rep-462701	2	3912641	11057.2	29.2721	1.11745	257	217			54.2507	45.7493			3.50995	Back Stutter	8.64956	Forward Stutter	7.9179	89	0.40934	0.229299			0.00192294	0.00119294
2.8.0	1-1_200pg_Set 2_rep-583957	2	4189267	8374.87	27.226	1.0749	258	219			54.0301	45.9699			3.52807	Back Stutter	7.36729	Forward Stutter	5.57159	89	0.397213	0.221018			0.00185078	0.00112968
2.8.0	1-1_200pg_Set 2_rep-660673	2	3708292	9244.58	27.43	1.07478	256	216			54.2261	45.7739			3.52541	Back Stutter	6.57322	Forward Stutter	7.07182	89	0.403137	0.218068			0.00189317	0.00112547
2.8.0	1-1_200pg_Set 2_rep-847668	2	3668743	8063.89	26.3578	1.01849	255	215			54.2554	45.7446			3.68227	Back Stutter	8.75581	Forward Stutter	6.68777	89	0.400495	0.224518			0.00189052	0.0011756
2.8.0	1-1_200pg_Set 2_rep-974442	2	3497356	10889.8	29.0286	1.06233	257	216			54.2569	45.7431			3.74989	Back Stutter	7.91795	Forward Stutter	6.01595	89	0.432887	0.242796			0.00207926	0.00127037
2.8.0	1-1_200pg_Set 2_rep-994985	2	4027743	12861.6	28.1021	1.05405	257	216			54.3225	45.6775			3.35099	Back Stutter	7.37845	Forward Stutter	5.68609	89	0.37583	0.259361			0.00172987	0.00136741
2.8.0	1-1_400pg_Set 2_rep-108730	2	2882024	11680	35.4256	1.04485	323	261			55.2629	44.7371			2.74439	Back Stutter	3.99595	Forward Stutter	4.70202	90	0.483791	0.23536			0.00178453	0.000993881
2.8.0	1-1_400pg_Set 2_rep-130673	2	2857498	19941	36.451	1.08299	326	267			55.025	44.975			2.92259	Back Stutter	4.05198	Forward Stutter	6.21647	90	0.496687	0.258664			0.00181747	0.00107695
2.8.0	1-1_400pg_Set 2_rep-337503	2	2875975	13180	34.6539	1.04788	323	264			54.9994	45.0006			2.81992	Back Stutter	4.73588	Forward Stutter	6.42591	90	0.489897	0.238818			0.00181235	0.000997955
2.8.0	1-1_400pg_Set 2_rep-368285	2	3013691	31045.6	34.1191	1.06462	319	260			55.0569	44.9431			2.92023	Back Stutter	5.07826	Forward Stutter	6.34338	90	0.461688	0.207858			0.00170992	0.000869726
2.8.0	1-1_400pg_Set 2_rep-462701	2	2835408	20941	35.0798	1.09164	313	259			54.7305	45.2695			3.06491	Back Stutter	4.07401	Forward Stutter	5.00133	90	0.443026	0.215483			0.00166739	0.000910908
2.8.0	1-1_400pg_Set 2_rep-583957	2	2720094	14914.6	35.9568	1.0495	318	262			54.8196	45.1804			2.97785	Back Stutter	4.61887	Forward Stutter	5.86594	90	0.470551	0.237884			0.00174871	0.00100018
2.8.0	1-1_400pg_Set 2_rep-660673	2	2918314	14510.4	35.7541	1.00858	321	265			54.7691	45.2309			3.01634	Back Stutter	5.58774	Forward Stutter	5.85561	90	0.473059	0.226144			0.00175005	0.000938782
2.8.0	1-1_400pg_Set 2_rep-847668	2	2767823	11041.3	37.1223	1.13317	320	263			54.8336	45.1664			3.03828	Back Stutter	4.18118	Forward Stutter	5.45358	90	0.475365	0.237476			0.00176133	0.00099332
2.8.0	1-1_400pg_Set 2_rep-974442	2	2780133	8538.23	35.3129	1.08509	326	266			55.0671	44.9329			3.16303	Back Stutter	4.57964	Forward Stutter	5.409	90	0.496882	0.224421			0.00181762	0.000925295
2.8.0	1-1_400pg_Set 2_rep-994985	2	3205764	18833.6	35.2906	1.14541	322	263			55.0204	44.9796			2.9626	Back Stutter	4.92481	Forward Stutter	6.94728	90	0.526991	0.274229			0.00199963	0.00118524
2.8.0	1-1_800pg_Set 2_rep-108730	2	3383614	15538.8	60.9294	1.10976	997	914			52.1633	47.8367			3.74711	Back Stutter	5.92692	Forward Stutter	6.38626	85	1.77168	0.774695			0.00223495	0.000955806
2.8.0	1-1_800pg_Set 2_rep-130673	2	3673419	12479.6	61.3016	1.03775	1026	948			51.9645	48.0355			3.67686	Back Stutter	5.77628	Forward Stutter	4.23085	85	1.54178	1.15679			0.00184066	0.0014572
2.8.0	1-1_800pg_Set 2_rep-337503	2	3528977	10845.8	60.4931	1.04203	996	914			52.1382	47.8618			3.93211	Back Stutter	5.96678	Forward Stutter	4.56291	85	1.60266	0.886309			0.00197935	0.00111155
2.8.0	1-1_800pg_Set 2_rep-368285	2	3525422	10220.1	59.9985	1.07082	997	917			52.0901	47.9099			4.01452	Back Stutter	5.79029	Forward Stutter	5.20969	85	1.41473	1.03066			0.00169776	0.00129449
2.8.0	1-1_800pg_Set 2_rep-462701	2	3014791	9756.9	60.5931	1.11609	1004	915			52.3395	47.6605			3.97349	Back Stutter	5.79749	Forward Stutter	3.99344	85	1.92526	0.728054			0.00245968	0.00088061
2.8.0	1-1_800pg_Set 2_rep-583957	2	4131760	18337.1	61.226	1.17488	1004	926			52.0159	47.9841			3.972	Back Stutter	5.91162	Forward Stutter	4.24995	85	1.42039	1.17831			0.00171202	0.00150704
2.8.0	1-1_800pg_Set 2_rep-660673	2	3226990	12302.3	60.6584	1.08569	974	894			52.1537	47.8463			3.75737	Back Stutter	6.00821	Forward Stutter	5.08275	85	1.64417	0.72626			0.00211693	0.000920716
2.8.0	1-1_800pg_Set 2_rep-847668	2	3337870	12004.9	59.2828	1.17129	989	903			52.2676	47.7324			4.30471	Back Stutter	5.91971	Forward Stutter	4.44556	85	1.79797	0.737028			0.00228457	0.000908949
2.8.0	1-1_800pg_Set 2_rep-974442	2	3207706	12645.9	58.9588	1.0166	994	906			52.3306	47.6694			4.13284	Back Stutter	5.77849	Forward Stutter	4.85094	85	1.92314	0.733487			0.0024617	0.000894475
2.8.0	1-1_800pg_Set 2_rep-994985	2	3176089	11491.9	59.8171	1.03904	998	912			52.2311	47.7689			3.92061	Back Stutter	5.86178	Forward Stutter	4.54637	85	1.83333	0.748795			0.00230868	0.000907083
2.8.0	3-1_25pg_Set 2_rep-108730	2	2075974	2274.72	-0.533711	1.07008	37	23			62.0736	37.9264			2.86448	Back Stutter	9.72293	Forward Stutter	5.99647	102	0.100903	0.0466224			0.00401683	0.00264121
2.8.0	3-1_25pg_Set 2_rep-130673	2	1973446	3630.08	-0.351546	1.07772	37	22			63.3219	36.6781			3.10447	Back Stutter	8.88684	Forward Stutter	6.32207	102	0.0960524	0.042045			0.00368619	0.00249873
2.8.0	3-1_25pg_Set 2_rep-337503	2	2300598	2108.43	-0.612318	1.19796	37	21			64.2568	35.7432			2.86795	Back Stutter	8.57159	Forward Stutter	5.43712	102	0.0889051	0.0469814			0.00339962	0.00322099
2.8.0	3-1_25pg_Set 2_rep-368285	2	2008069	2907.24	-0.592874	1.05761	39	20			65.8008	34.1992			2.93598	Back Stutter	9.77784	Forward Stutter	6.31936	102	0.0904173	0.0498192			0.00318484	0.0035509
2.8.0	3-1_25pg_Set 2_rep-462701	2	1874815	3057.62	-1.053	1.11833	37	21			63.2804	36.7196			2.83117	Back Stutter	8.33307	Forward Stutter	7.52906	102	0.0985955	0.0505124			0.00394546	0.00347135
2.8.0	3-1_25pg_Set 2_rep-583957	2	1879907	4036.16	-1.2321	1.18263	35	19			64.4071	35.5929			3.07205	Back Stutter	7.33537	Forward Stutter	5.02934	102	0.0771034	0.0488448			0.00309335	0.00369322
2.8.0	3-1_25pg_Set 2_rep-660673	2	1853965	2471.1	-0.960811	1.08133	35	20			63.8248	36.1752			3.32201	Back Stutter	10.982	Forward Stutter	7.27331	102	0.074967	0.0542129			0.00283579	0.00414066
2.8.0	3-1_25pg_Set 2_rep-847668	2	2028592	4214.66	-0.441492	1.12973	36	21			62.7795	37.2205			2.96769	Back Stutter	10.2398	Forward Stutter	6.08366	102	0.0861614	0.0421204			0.00331757	0.00260523
2.8.0	3-1_25pg_Set 2_rep-974442	2	1951594	2259.51	-0.587335	1.05945	36	20			64.271	35.729			3.10405	Back Stutter	9.69364	Forward Stutter	5.88908	102	0.0777343	0.0443688			0.00291728	0.00300913
2.8.0	3-1_25pg_Set 2_rep-994985	2	2026856	2971.34	-0.550489	1.08406	38	22			63.0001	36.9999			3.07299	Back Stutter	9.62498	Forward Stutter	5.23837	102	0.100653	0.0530982			0.00383767	0.00345737
2.8.0	3-1_50pg_Set 2_rep-108730	2	2362574	5271.29	0.125306	1.0529	47	31			59.9591	40.0409			2.97022	Back Stutter	8.74045	Forward Stutter	6.24882	90	0.0896368	0.046672			0.00243838	0.00177722
2.8.0	3-1_50pg_Set 2_rep-130673	2	2156969	4797.22	0.660908	1.13314	49	33			60.1956	39.8044			3.10011	Back Stutter	8.34298	Forward Stutter	6.47956	90	0.118092	0.0522812			0.00332482	0.00204782
2.8.0	3-1_50pg_Set 2_rep-337503	2	2011372	6724.87	0.229227	1.1225	48	31			60.7044	39.2956			3.51632	Back Stutter	8.96703	Forward Stutter	6.36968	90	0.100536	0.0603515			0.00279647	0.0025791
2.8.0	3-1_50pg_Set 2_rep-368285	2	2324108	6168.69	0.221604	1.11771	48	32			60.093	39.907			3.08654	Back Stutter	12.4672	Forward Stutter	7.39129	90	0.0856447	0.0625531			0.00225299	0.00267304
2.8.0	3-1_50pg_Set 2_rep-462701	2	2166949	6328.56	0.745005	1.11738	46	30			60.4503	39.5497			3.22084	Back Stutter	9.04205	Forward Stutter	6.78379	90	0.0883665	0.0504344			0.00243727	0.00204509
2.8.0	3-1_50pg_Set 2_rep-583957	2	2467827	4514.63	0.332295	1.1266	48	32			60.2145	39.7855			2.94833	Back Stutter	15.4444	Forward Stutter	5.9857	90	0.0751919	0.0595842			0.00188495	0.00240795
2.8.0	3-1_50pg_Set 2_rep-660673	2	2107840	5690.44	0.363473	1.09034	46	31			59.908	40.092			2.96049	Back Stutter	9.91829	Forward Stutter	6.21969	90	0.0963839	0.054442			0.00282419	0.00227778
2.8.0	3-1_50pg_Set 2_rep-847668	2	2221515	5695.2	0.921166	1.08666	49	33			59.8868	40.1132			2.66293	Back Stutter	9.7797	Forward Stutter	5.93949	90	0.108803	0.0546843			0.00296597	0.00217513
2.8.0	3-1_50pg_Set 2_rep-974442	2	2087861	4354.69	0.75589	1.17381	46	31			60.2734	39.7266			3.17346	Back Stutter	8.4121	Forward Stutter	5.5912	90	0.111116	0.0490103			0.00330981	0.0020034
2.8.0	3-1_50pg_Set 2_rep-994985	2	2254032	3058.76	0.623266	1.02834	49	33			60.0614	39.9386			3.33476	Back Stutter	8.75385	Forward Stutter	5.35156	90	0.0985448	0.0578898			0.002592	0.00228187
2.8.0	3-1_100pg_Set 2_rep-108730	2	3427388	7379.21	11.4873	1.16752	88	50			63.632	36.368			3.21647	Back Stutter	9.41864	Forward Stutter	6.23728	90	0.201813	0.100836			0.00305552	0.00272877
2.8.0	3-1_100pg_Set 2_rep-130673	2	3774244	10776.5	10.5179	1.0889	89	50			63.875	36.125			2.78286	Back Stutter	8.78256	Forward Stutter	6.14025	90	0.208485	0.0746861			0.00315587	0.00176416
2.8.0	3-1_100pg_Set 2_rep-337503	2	4011721	9128.53	9.54178	1.03602	90	53			62.7778	37.2222			3.12395	Back Stutter	11.4719	Forward Stutter	7.2499	90	0.192212	0.0884413			0.00281904	0.00201863
2.8.0	3-1_100pg_Set 2_rep-368285	2	3847764	12444.1	8.98263	1.05459	90	51			64.0239	35.9761			3.20267	Back Stutter	8.62726	Forward Stutter	5.7878	90	0.207656	0.0796694			0.00313457	0.00191249
2.8.0	3-1_100pg_Set 2_rep-462701	2	3607621	8339.14	9.81407	1.05347	88	50			63.5581	36.4419			3.0113	Back Stutter	8.6338	Forward Stutter	5.79697	90	0.179376	0.0928395			0.00264977	0.00231453
2.8.0	3-1_100pg_Set 2_rep-583957	2	3493404	11955.5	10.5439	1.14227	91	51			64.3037	35.6963			3.11608	Back Stutter	9.41704	Forward Stutter	5.22356	90	0.226201	0.0858377			0.00348018	0.00215292
2.8.0	3-1_100pg_Set 2_rep-660673	2	3740849	9205.56	9.41666	1.08247	89	54			62.4303	37.5697			3.3931	Back Stutter	7.60225	Forward Stutter	7.35776	90	0.19841	0.0978292			0.00300845	0.00231909
2.8.0	3-1_100pg_Set 2_rep-847668	2	3561116	6763.56	10.1769	1.1113	90	53			62.8427	37.1573			3.38024	Back Stutter	10.0252	Forward Stutter	7.57888	90	0.225	0.0808864			0.00345048	0.00183492
2.8.0	3-1_100pg_Set 2_rep-974442	2	3781727	11896.2	9.88794	1.16467	88	51			63.2269	36.7731			2.84851	Back Stutter	10.784	Forward Stutter	5.88277	90	0.217482	0.0788379			0.00353891	0.0018673
2.8.0	3-1_100pg_Set 2_rep-994985	2	3847317	9849.12	9.26317	1.29751	89	49			64.2949	35.7051			3.28097	Back Stutter	8.50239	Forward Stutter	7.93098	90	0.232995	0.0735463			0.00378576	0.00178977
2.8.0	3-1_152pg_Set 2_rep-108730	2	5701264	11925.4	17.4136	1.02352	148	42			77.9943	22.0057			2.30354	Back Stutter	8.13605	Forward Stutter	5.16838	89	0.185376	0.0702003			0.00143885	0.00202709
2.8.0	3-1_152pg_Set 2_rep-130673	2	5078739	9828.73	17.5899	1.11701	151	44			77.3189	22.6811			2.63286	Back Stutter	7.68715	Forward Stutter	5.28181	89	0.231644	0.0874559			0.00188502	0.00251535
2.8.0	3-1_152pg_Set 2_rep-337503	2	5433895	9075.93	17.5344	1.06242	155	44			77.6505	22.3495			2.32506	Back Stutter	8.78176	Forward Stutter	6.21864	89	0.221458	0.0835643			0.00169451	0.00236213
2.8.0	3-1_152pg_Set 2_rep-368285	2	6017727	17465.5	16.7505	1.11455	155	47			76.8122	23.1878			2.68394	Back Stutter	9.17092	Forward Stutter	4.786	89	0.204827	0.0879246			0.00153917	0.00236441
2.8.0	3-1_152pg_Set 2_rep-462701	2	5994081	14096.1	16.9127	1.28177	148	48			75.7048	24.2952			2.59659	Back Stutter	10.7124	Forward Stutter	6.28399	89	0.249652	0.0690126			0.00236173	0.001874
2.8.0	3-1_152pg_Set 2_rep-583957	2	5926794	6804.39	17.3472	1.07596	154	44			77.7578	22.2422			2.69498	Back Stutter	10.8795	Forward Stutter	6.83277	89	0.210723	0.0711552			0.0016027	0.00196159
2.8.0	3-1_152pg_Set 2_rep-660673	2	5397978	10937.5	16.6697	1.08374	155	45			77.5964	22.4036			2.50996	Back Stutter	10.9241	Forward Stutter	5.7825	89	0.221627	0.0828627			0.00168697	0.00233158
2.8.0	3-1_152pg_Set 2_rep-847668	2	5846376	11599.3	17.6642	1.05776	149	42			77.9153	22.0847			2.6731	Back Stutter	10.2035	Forward Stutter	7.02727	89	0.189556	0.0681722			0.00147396	0.00194971
2.8.0	3-1_152pg_Set 2_rep-974442	2	5323026	11533	16.76	1.11833	149	42			77.923	22.077			2.60141	Back Stutter	7.49815	Forward Stutter	5.82289	89	0.192586	0.0700615			0.0014977	0.00200858
2.8.0	3-1_152pg_Set 2_rep-994985	2	5494633	14114.8	16.9588	1.07287	155	45			77.6751	22.3249			2.47825	Back Stutter	8.82487	Forward Stutter	5.52327	89	0.227023	0.085172			0.00175286	0.00241929
2.8.0	3-1_200pg_Set 2_rep-108730	2	6336688	11832.3	20.9671	1.09364	197	76			72.0887	27.9113			2.93438	Back Stutter	6.89456	Forward Stutter	6.27896	89	0.232213	0.171397			0.00134006	0.00299457
2.8.0	3-1_200pg_Set 2_rep-130673	2	7490352	8472.04	21.0998	1.03571	204	82			71.3057	28.6943			2.77401	Back Stutter	9.23721	Forward Stutter	6.94043	89	0.25501	0.206408			0.0014391	0.00349825
2.8.0	3-1_200pg_Set 2_rep-337503	2	6966253	14045.2	20.6768	1.04904	197	73			72.9567	27.0433			2.64507	Back Stutter	7.47242	Forward Stutter	6.56402	89	0.240354	0.157091			0.00140968	0.00282846
2.8.0	3-1_200pg_Set 2_rep-368285	2	8688982	8564.51	21.218	1.22251	202	80			71.7086	28.2914			3.10758	Back Stutter	7.14916	Forward Stutter	6.23642	89	0.272285	0.186368			0.00158958	0.00316486
2.8.0	3-1_200pg_Set 2_rep-462701	2	7224046	9393.33	21.4467	1.05338	200	81			71.2127	28.7873			2.6686	Back Stutter	10.0668	Forward Stutter	6.10742	89	0.223848	0.202246			0.00126846	0.00346002
2.8.0	3-1_200pg_Set 2_rep-583957	2	7443288	9059.07	21.3374	1.09645	199	78			71.8768	28.1232			2.75879	Back Stutter	10.0771	Forward Stutter	6.8039	89	0.210374	0.181005			0.00118832	0.00310659
2.8.0	3-1_200pg_Set 2_rep-660673	2	7294359	11641.2	21.4216	1.17024	195	75			72.2307	27.7693			2.8384	Back Stutter	7.57805	Forward Stutter	6.18219	89	0.221189	0.162932			0.001281	0.00285281
2.8.0	3-1_200pg_Set 2_rep-847668	2	6586501	15577.6	20.795	1.17101	198	79			71.5326	28.4674			2.74179	Back Stutter	6.87978	Forward Stutter	5.27152	89	0.242995	0.186062			0.00143401	0.00319775
2.8.0	3-1_200pg_Set 2_rep-974442	2	6525138	7751.58	21.262	1.10556	201	81			71.3401	28.6599			2.71847	Back Stutter	9.18077	Forward Stutter	6.43696	89	0.238035	0.200642			0.00135403	0.00344748
2.8.0	3-1_200pg_Set 2_rep-994985	2	7828363	9737.41	20.4287	1.0693	194	78			71.2346	28.7654			2.76446	Back Stutter	10.403	Forward Stutter	5.81461	89	0.204468	0.194342			0.00118332	0.00343402
2.8.0	3-1_300pg_Set 2_rep-108730	2	10608854	19404	28.5879	1.03751	285	87			76.5511	23.4489			2.19866	Back Stutter	7.87166	Forward Stutter	6.77181	90	0.395821	0.0882624			0.0016258	0.0011265
2.8.0	3-1_300pg_Set 2_rep-130673	2	8362017	11326.5	28.3417	1.05432	299	90			76.9736	23.0264			2.1616	Back Stutter	5.00511	Forward Stutter	6.69937	90	0.47828	0.0991889			0.00192943	0.0012551
2.8.0	3-1_300pg_Set 2_rep-337503	2	9351676	9704.96	28.7122	1.03113	295	89			76.7308	23.2692			2.24304	Back Stutter	6.66485	Forward Stutter	5.64256	90	0.458542	0.102409			0.00186417	0.00130355
2.8.0	3-1_300pg_Set 2_rep-368285	2	9974281	11844.1	28.4843	1.03723	301	91			76.8058	23.1942			2.13415	Back Stutter	6.92159	Forward Stutter	7.32098	90	0.455897	0.0972728			0.001804	0.00120341
2.8.0	3-1_300pg_Set 2_rep-462701	2	7701772	14277	28.6773	1.06216	289	87			76.8917	23.1083			2.16975	Back Stutter	6.1834	Forward Stutter	5.2569	90	0.467493	0.0994626			0.00195568	0.00130132
2.8.0	3-1_300pg_Set 2_rep-583957	2	9347958	9797.61	28.6138	1.02593	290	89			76.6161	23.3839			2.21424	Back Stutter	6.99396	Forward Stutter	5.45319	90	0.411599	0.0931218			0.0016717	0.00118157
2.8.0	3-1_300pg_Set 2_rep-660673	2	10042635	14536.4	28.643	1.0142	295	89			76.7855	23.2145			2.17711	Back Stutter	5.57118	Forward Stutter	7.74496	90	0.441062	0.0943604			0.00177034	0.00118871
2.8.0	3-1_300pg_Set 2_rep-847668	2	9243605	14060.4	28.5565	1.07182	295	89			76.8211	23.1789			2.07783	Back Stutter	7.06778	Forward Stutter	7.15956	90	0.449172	0.0958071			0.00181853	0.00121238
2.8.0	3-1_300pg_Set 2_rep-974442	2	9481395	10140.8	28.2808	1.04569	299	91			76.6138	23.3862			2.18893	Back Stutter	8.74742	Forward Stutter	5.18314	90	0.469488	0.111007			0.00188123	0.00138901
2.8.0	3-1_300pg_Set 2_rep-994985	2	10054205	11198	28.44	1.06729	292	89			76.7045	23.2955			2.21883	Back Stutter	5.31705	Forward Stutter	7.36972	90	0.462169	0.103816			0.00190216	0.00133371
2.8.0	3-1_348pg_Set 2_rep-108730	2	8082439	9131.54	30.1955	1.01354	487	158			75.5311	24.4689			3.04628	Back Stutter	4.62857	Forward Stutter	7.74988	90	0.644012	0.321819			0.00153161	0.00261586
2.8.0	3-1_348pg_Set 2_rep-130673	2	8751564	8443.7	29.9056	1.01909	471	152			75.5763	24.4237			3.13442	Back Stutter	4.37493	Forward Stutter	6.38337	90	0.576291	0.296442			0.00139539	0.00245582
2.8.0	3-1_348pg_Set 2_rep-337503	2	7575117	9991.29	30.3953	1.03161	477	157			75.2716	24.7284			3.14189	Back Stutter	4.14798	Forward Stutter	5.30359	90	0.627132	0.327714			0.00152396	0.00270261
2.8.0	3-1_348pg_Set 2_rep-368285	2	8052609	8873.13	30.5547	1.0441	487	159			75.443	24.557			3.00834	Back Stutter	5.08326	Forward Stutter	5.25493	90	0.62623	0.319187			0.00148734	0.00257718
2.8.0	3-1_348pg_Set 2_rep-462701	2	7688924	8635.74	30.1036	1.08809	479	157			75.3137	24.6863			3.11066	Back Stutter	4.63359	Forward Stutter	5.71868	90	0.600301	0.318704			0.00144404	0.00260316
2.8.0	3-1_348pg_Set 2_rep-583957	2	9984290	11368.1	29.9902	1.05748	481	157			75.3295	24.6705			3.02024	Back Stutter	4.89599	Forward Stutter	4.32501	90	0.556228	0.306086			0.00131366	0.0024676
2.8.0	3-1_348pg_Set 2_rep-660673	2	8743160	9659.8	30.8266	1.07782	476	156			75.3251	24.6749			3.16397	Back Stutter	4.6075	Forward Stutter	6.25797	90	0.530203	0.301372			0.00125882	0.00243536
2.8.0	3-1_348pg_Set 2_rep-847668	2	9215716	13584	30.863	1.06791	488	158			75.5018	24.4982			3.0356	Back Stutter	5.6593	Forward Stutter	7.72058	90	0.597527	0.310857			0.00140238	0.00248999
2.8.0	3-1_348pg_Set 2_rep-974442	2	9158059	6130.11	31.1918	1.02801	486	161			75.1674	24.8326			3.09509	Back Stutter	3.98971	Forward Stutter	7.17076	90	0.623594	0.338916			0.00148568	0.00273916
2.8.0	3-1_348pg_Set 2_rep-994985	2	8304440	7590.24	30.3842	1.08732	485	159			75.3083	24.6917			3.16547	Back Stutter	5.73253	Forward Stutter	6.7221	90	0.596915	0.321541			0.00141191	0.00258379
2.8.0	3-1_400pg_Set 2_rep-108730	2	8984519	9374.56	27.0188	1.01484	343	117			74.5228	25.4772			2.8392	Back Stutter	5.55136	Forward Stutter	6.34766	89	0.3166	0.183499			0.00102118	0.0018795
2.8.0	3-1_400pg_Set 2_rep-130673	2	9478034	8451.91	27.1247	1.06333	345	119			74.3782	25.6218			2.94639	Back Stutter	5.78074	Forward Stutter	4.62736	89	0.363267	0.203248			0.00118333	0.00209473
2.8.0	3-1_400pg_Set 2_rep-337503	2	9800066	10999.4	27.341	1.03341	356	120			74.8735	25.1265			2.88806	Back Stutter	5.75126	Forward Stutter	6.95953	89	0.352699	0.182609			0.001102	0.00181972
2.8.0	3-1_400pg_Set 2_rep-368285	2	8770405	5360.9	27.7266	1.06957	343	115			74.8542	25.1458			2.85496	Back Stutter	5.99657	Forward Stutter	4.98579	89	0.345189	0.177342			0.00111834	0.00183385
2.8.0	3-1_400pg_Set 2_rep-462701	2	9180144	5637.66	27.1517	1.02549	343	116			74.7786	25.2214			2.93552	Back Stutter	5.25936	Forward Stutter	5.46091	89	0.304207	0.16876			0.000975394	0.00172227
2.8.0	3-1_400pg_Set 2_rep-583957	2	9225511	10054.4	27.0359	1.10601	351	119			74.6102	25.3898			3.14486	Back Stutter	6.35346	Forward Stutter	6.41661	89	0.355076	0.193066			0.00113213	0.00195432
2.8.0	3-1_400pg_Set 2_rep-660673	2	9088315	6946.23	27.476	1.02375	358	121			74.7711	25.2289			2.90449	Back Stutter	5.14481	Forward Stutter	4.6622	89	0.40826	0.203568			0.00129611	0.00205249
2.8.0	3-1_400pg_Set 2_rep-847668	2	10315504	8636.45	27.6173	1.04271	353	122			74.4039	25.5961			2.92973	Back Stutter	4.72571	Forward Stutter	6.06384	89	0.326236	0.196268			0.00101623	0.00194786
2.8.0	3-1_400pg_Set 2_rep-974442	2	7361728	9928.67	26.5066	1.09648	336	115			74.4277	25.5723			3.07052	Back Stutter	5.09594	Forward Stutter	6.90387	89	0.349326	0.19387			0.00117471	0.00205513
2.8.0	3-1_400pg_Set 2_rep-994985	2	8054230	7048.92	27.8104	1.00544	343	116			74.823	25.177			2.7159	Back Stutter	5.05268	Forward Stutter	6.98784	89	0.303569	0.166122			0.000971307	0.00168716
2.8.0	3-1_800pg_Set 2_rep-108730	2	3952499	6717.47	42.6852	1.05772	837	276			75.2132	24.7868			3.13574	Back Stutter	6.70433	Forward Stutter	4.86919	85	0.527896	0.516293			0.000673869	0.00234465
2.8.0	3-1_800pg_Set 2_rep-130673	2	3763377	15326	42.5701	1.09482	838	277			75.1372	24.8628			3.10483	Back Stutter	6.93141	Forward Stutter	5.29612	85	0.555647	0.533333			0.000710577	0.00242812
2.8.0	3-1_800pg_Set 2_rep-337503	2	3781067	8678.89	42.5424	1.07228	819	271			75.1235	24.8765			2.9525	Back Stutter	6.78795	Forward Stutter	5.64301	85	0.468991	0.504004			0.000609759	0.00232382
2.8.0	3-1_800pg_Set 2_rep-368285	2	4182656	9191.95	43.0208	1.12139	843	281			75.0265	24.9735			3.28108	Back Stutter	6.95235	Forward Stutter	5.30133	85	0.56411	0.549786			0.00071765	0.00248709
2.8.0	3-1_800pg_Set 2_rep-462701	2	4744592	11990.1	43.1892	1.21495	836	278			75.0454	24.9546			3.22583	Back Stutter	6.4796	Forward Stutter	4.86643	85	0.572776	0.546044			0.00073845	0.00249577
2.8.0	3-1_800pg_Set 2_rep-583957	2	4148686	5594.71	42.357	1.04395	844	280			75.0606	24.9394			3.28283	Back Stutter	6.96988	Forward Stutter	8.94287	85	0.499776	0.529825			0.000630039	0.0023721
2.8.0	3-1_800pg_Set 2_rep-660673	2	4307828	7523.02	42.4805	1.05865	830	273			75.2217	24.7783			3.05329	Back Stutter	6.70281	Forward Stutter	5.7476	85	0.492457	0.504961			0.000631275	0.00230599
2.8.0	3-1_800pg_Set 2_rep-847668	2	4297176	8057.7	43.2224	1.03195	848	280			75.1928	24.8072			3.0322	Back Stutter	6.69385	Forward Stutter	5.69529	85	0.547599	0.530169			0.000691319	0.00238006
2.8.0	3-1_800pg_Set 2_rep-974442	2	3984850	8138.6	42.5897	1.03781	838	278			75.0863	24.9137			2.9704	Back Stutter	6.49927	Forward Stutter	5.13073	85	0.552009	0.537564			0.000707935	0.00244595
2.8.0	3-1_800pg_Set 2_rep-994985	2	3714916	7312.06	42.7725	1.03276	835	278			75.054	24.946			3.04607	Back Stutter	6.96481	Forward Stutter	5.45147	85	0.596269	0.552344			0.000770661	0.00253898
2.8.0	9-1_1ng_Set 1 Amp 1	2	7145352	8529.61	43.0361	1.11465	1021	164			86.1878	13.8122			3.50355	Back Stutter	5.39482	Forward Stutter	7.02592	85	0.556048	0.314631			0.000575537	0.00242362
2.8.0	9-1_1ng_Set 1 Amp 1_rep-72994	2	7374128	11625.8	42.9297	1.08087	1053	168			86.2061	13.7939			3.34115	Back Stutter	5.46393	Forward Stutter	8.47832	85	0.685274	0.333385			0.0006978	0.00252032
2.8.0	9-1_1ng_Set 1 Amp 1_rep-363864	2	7992896	7483.8	43.1381	1.0438	1036	165			86.2784	13.7216			3.3626	Back Stutter	5.51102	Forward Stutter	6.53682	85	0.587901	0.313691			0.000601515	0.00239326
2.8.0	9-1_1ng_Set 1 Amp 1_rep-403455	2	7213860	8491.87	43.1274	1.15223	1043	166			86.2652	13.7348			3.58255	Back Stutter	5.36672	Forward Stutter	5.84409	85	0.634508	0.321161			0.000649479	0.00244861
2.8.0	9-1_1ng_Set 1 Amp 1_rep-440935	2	7152389	9307.89	42.766	1.0291	1033	165			86.2047	13.7953			3.33463	Back Stutter	5.42377	Forward Stutter	7.1402	85	0.632214	0.325471			0.000653424	0.00249889
2.8.0	9-1_1ng_Set 1 Amp 1_rep-511845	2	7148089	7644.15	43.3675	1.05538	1034	164			86.28	13.72			3.24118	Back Stutter	5.57221	Forward Stutter	5.05907	85	0.62581	0.317303			0.000646423	0.00243973
2.8.0	9-1_1ng_Set 1 Amp 1_rep-537631	2	6963704	8684.31	43.28	1.12064	1020	161			86.3894	13.6106			3.26792	Back Stutter	5.32194	Forward Stutter	5.16203	85	0.618874	0.30409			0.000646739	0.00237366
2.8.0	9-1_1ng_Set 1 Amp 1_rep-553752	2	7307761	10875.9	43.0576	1.01857	1047	166			86.2791	13.7209			3.25041	Back Stutter	5.80783	Forward Stutter	5.99539	85	0.621011	0.320324			0.000630601	0.00242809
2.8.0	9-1_1ng_Set 1 Amp 1_rep-770696	2	7116114	6698	42.8248	1.04741	1034	165			86.2386	13.7614			3.40862	Back Stutter	5.87597	Forward Stutter	6.14577	85	0.626636	0.32001			0.000645058	0.00245552
2.8.0	9-1_1ng_Set 1 Amp 1_rep-850671	2	7187213	6277.72	42.4948	1.08697	1046	167			86.2261	13.7739			3.74049	Back Stutter	5.87596	Forward Stutter	5.25349	85	0.660979	0.328702			0.000675202	0.00249612
2.8.0	9-1_1ng_Set 1 Amp 2	2	4496899	10300.1	39.7938	1.0104	955	123			88.6336	11.3664			2.87828	Back Stutter	4.06345	Forward Stutter	4.54615	85	1.17826	0.190176			0.00141402	0.00185119
2.8.0	9-1_1ng_Set 1 Amp 2_rep-72994	2	4462731	19488.9	40.0242	1.08497	928	118			88.6775	11.3225			2.77648	Back Stutter	4.24071	Forward Stutter	6.07747	85	1.13183	0.179496			0.0014066	0.00181364
2.8.0	9-1_1ng_Set 1 Amp 2_rep-363864	2	4558822	9329.03	39.882	1.08853	892	115			88.6191	11.3809			2.94143	Back Stutter	4.01774	Forward Stutter	4.60714	85	0.883642	0.153			0.0011051	0.00155179
2.8.0	9-1_1ng_Set 1 Amp 2_rep-403455	2	4439198	12876.4	39.6251	1.07119	939	120			88.6883	11.3117			2.911	Back Stutter	4.10685	Forward Stutter	5.17632	85	1.12417	0.179541			0.0013698	0.00178253
2.8.0	9-1_1ng_Set 1 Amp 2_rep-440935	2	4529986	12950.8	39.9271	1.03881	938	121			88.6013	11.3987			2.7236	Back Stutter	4.21744	Forward Stutter	4.20204	85	1.18766	0.19284			0.00145206	0.00191326
2.8.0	9-1_1ng_Set 1 Amp 2_rep-511845	2	4765923	16418.7	40.1566	1.05291	930	120			88.6074	11.3926			2.70335	Back Stutter	4.12605	Forward Stutter	5.29514	85	1.02946	0.17339			0.00124965	0.00170915
2.8.0	9-1_1ng_Set 1 Amp 2_rep-537631	2	4832424	15455.6	39.4303	1.00605	905	116			88.6233	11.3767			2.61351	Back Stutter	4.43968	Forward Stutter	5.11542	85	0.988769	0.166716			0.00123048	0.00168693
2.8.0	9-1_1ng_Set 1 Amp 2_rep-553752	2	4446658	11349.1	39.9983	1.04726	956	122			88.7167	11.2833			2.68487	Back Stutter	4.11386	Forward Stutter	4.8762	85	1.24155	0.190826			0.00150634	0.00188712
2.8.0	9-1_1ng_Set 1 Amp 2_rep-770696	2	4156866	13788.5	40.1002	1.05894	926	118			88.6754	11.3246			2.62771	Back Stutter	4.07383	Forward Stutter	5.01859	85	1.26565	0.1954			0.00160602	0.00201521
2.8.0	9-1_1ng_Set 1 Amp 2_rep-850671	2	4710208	11902.3	40.0266	1.03267	944	121			88.6513	11.3487			2.78491	Back Stutter	4.05646	Forward Stutter	4.32824	85	1.07919	0.176106			0.00129908	0.00172365
2.8.0	9-1_2ng_Set 1 Amp 1	2	5382169	10708	51.7593	1.12755	1625	226			87.7782	12.2218			3.65935	Back Stutter	8.75581	Forward Stutter	5.21977	85	1.71964	0.412478			0.00119172	0.0022693
2.8.0	9-1_2ng_Set 1 Amp 1_rep-72994	2	4852476	12177.6	51.8151	1.02309	1562	218			87.7362	12.2638			3.50431	Back Stutter	8.66548	Forward Stutter	4.06336	85	1.61011	0.398032			0.00115311	0.00226435
2.8.0	9-1_2ng_Set 1 Amp 1_rep-363864	2	4967141	10501	51.4981	1.14203	1536	212			87.8796	12.1204			3.66394	Back Stutter	8.6599	Forward Stutter	4.36374	85	1.48754	0.36302			0.00108987	0.00211023
2.8.0	9-1_2ng_Set 1 Amp 1_rep-403455	2	5251079	12770	51.9553	1.0972	1583	222			87.6803	12.3197			3.84737	Back Stutter	8.55502	Forward Stutter	4.13721	85	1.54125	0.400863			0.00108386	0.00223488
2.8.0	9-1_2ng_Set 1 Amp 1_rep-440935	2	5134275	11074.1	52.0155	1.0753	1558	216			87.8164	12.1836			3.83306	Back Stutter	8.70845	Forward Stutter	5.59981	85	1.56431	0.38211			0.00111708	0.00217682
2.8.0	9-1_2ng_Set 1 Amp 1_rep-511845	2	5614622	14591.9	51.4734	1.06559	1572	218			87.8412	12.1588			3.59867	Back Stutter	8.47853	Forward Stutter	5.2624	85	1.41241	0.364712			0.000988554	0.00203778
2.8.0	9-1_2ng_Set 1 Amp 1_rep-537631	2	5162995	11982.2	52.2916	1.07163	1605	225			87.6892	12.3108			3.76334	Back Stutter	8.55286	Forward Stutter	4.9207	85	1.75881	0.426875			0.00124025	0.00238206
2.8.0	9-1_2ng_Set 1 Amp 1_rep-553752	2	5144368	9875.58	51.8233	1.1188	1556	217			87.7664	12.2336			3.61665	Back Stutter	8.23135	Forward Stutter	5.94859	85	1.46691	0.377984			0.00104694	0.0021416
2.8.0	9-1_2ng_Set 1 Amp 1_rep-770696	2	5313151	13113.3	51.5202	1.09979	1576	221			87.71	12.29			3.46653	Back Stutter	8.5202	Forward Stutter	5.40649	85	1.72484	0.416133			0.00123445	0.00236196
2.8.0	9-1_2ng_Set 1 Amp 1_rep-850671	2	5174873	5925.47	51.7135	1.14738	1559	216			87.8322	12.1678			3.74168	Back Stutter	8.93782	Forward Stutter	4.73819	85	1.45965	0.369237			0.001044	0.00209885
2.8.0	9-1_2ng_Set 1 Amp 2	2	5399913	8589.05	55.2825	1.05846	1951	221			89.8112	10.1888			3.01907	Back Stutter	10.093	Forward Stutter	5.51979	85	2.17501	0.182619			0.00126061	0.000900891
2.8.0	9-1_2ng_Set 1 Amp 2_rep-72994	2	4923422	9004.08	54.8925	1.01882	1918	216			89.8674	10.1326			3.07327	Back Stutter	10.4659	Forward Stutter	4.07435	85	2.18594	0.176053			0.0012944	0.000891328
2.8.0	9-1_2ng_Set 1 Amp 2_rep-363864	2	5440178	17343.7	54.7897	1.06985	1878	213			89.8137	10.1863			2.9886	Back Stutter	10.4941	Forward Stutter	3.51638	85	1.90235	0.152839			0.00113444	0.000777174
2.8.0	9-1_2ng_Set 1 Amp 2_rep-403455	2	5778644	9563.66	54.9422	1.07519	1881	215			89.745	10.255			3.03169	Back Stutter	10.7166	Forward Stutter	4.70474	85	1.74796	0.146186			0.00102942	0.000731051
2.8.0	9-1_2ng_Set 1 Amp 2_rep-440935	2	5356145	7253.22	55.2045	1.16459	1890	214			89.8215	10.1785			3.05536	Back Stutter	10.6478	Forward Stutter	4.57127	85	1.97665	0.160478			0.00117618	0.000815394
2.8.0	9-1_2ng_Set 1 Amp 2_rep-511845	2	5439835	7929.57	55.0904	1.10113	1919	218			89.8135	10.1865			3.11511	Back Stutter	10.1827	Forward Stutter	4.18337	85	2.05385	0.168992			0.00120294	0.000844235
2.8.0	9-1_2ng_Set 1 Amp 2_rep-537631	2	5409291	6437.94	54.9336	1.06754	1902	215			89.8538	10.1462			2.90193	Back Stutter	10.2344	Forward Stutter	5.11164	85	2.09646	0.168818			0.00124724	0.000856751
2.8.0	9-1_2ng_Set 1 Amp 2_rep-553752	2	5225903	8318.85	54.815	1.03563	1911	216			89.8475	10.1525			2.90979	Back Stutter	9.85883	Forward Stutter	5.67322	85	2.00392	0.157322			0.00117402	0.000785257
2.8.0	9-1_2ng_Set 1 Amp 2_rep-770696	2	5431324	12810.2	54.4684	1.11775	1889	214			89.8079	10.1921			2.97453	Back Stutter	10.1481	Forward Stutter	5.56766	85	1.93913	0.158217			0.00115003	0.000799335
2.8.0	9-1_2ng_Set 1 Amp 2_rep-850671	2	4836135	6865.45	55.2406	1.05346	1877	214			89.7436	10.2564			2.97442	Back Stutter	10.2172	Forward Stutter	4.01522	85	1.95268	0.167794			0.001166	0.000850604
2.8.0	9-1_63pg_Set 1 Amp 1	2	2209158	4521.7	1.85551	1.17648	58	33			63.5734	36.4266			3.06039	Back Stutter	9.02666	Forward Stutter	5.44314	102	0.167699	0.064172			0.00443303	0.00246288
2.8.0	9-1_63pg_Set 1 Amp 1_rep-72994	2	2249920	6033.66	1.57284	1.0817	56	34			62.0398	37.9602			3.35665	Back Stutter	10.2017	Forward Stutter	6.44476	102	0.145295	0.0665857			0.00381305	0.00255659
2.8.0	9-1_63pg_Set 1 Amp 1_rep-363864	2	2200663	9762.86	1.33749	1.1652	55	33			62.8151	37.1849			3.05827	Back Stutter	8.06908	Forward Stutter	5.65084	102	0.147623	0.0763599			0.00378107	0.00322495
2.8.0	9-1_63pg_Set 1 Amp 1_rep-403455	2	2307154	6821.85	1.40562	1.151	53	32			62.0875	37.9125			3.11946	Back Stutter	8.52382	Forward Stutter	7.52853	102	0.115897	0.0700632			0.00290775	0.00295865
2.8.0	9-1_63pg_Set 1 Amp 1_rep-440935	2	2245103	4579.25	1.73939	1.02237	55	32			63.0511	36.9489			2.93435	Back Stutter	9.46382	Forward Stutter	4.36675	102	0.142077	0.0608629			0.00365759	0.00244061
2.8.0	9-1_63pg_Set 1 Amp 1_rep-511845	2	2132134	5368.23	1.41865	1.08704	55	33			62.4663	37.5337			3.18246	Back Stutter	8.27803	Forward Stutter	6.17211	102	0.148977	0.0694244			0.00397944	0.00277161
2.8.0	9-1_63pg_Set 1 Amp 1_rep-537631	2	2266379	6603.56	1.25833	1.07998	56	35			61.6931	38.3069			3.33991	Back Stutter	9.07747	Forward Stutter	7.68952	102	0.139633	0.0846065			0.00346842	0.00341129
2.8.0	9-1_63pg_Set 1 Amp 1_rep-553752	2	2652814	3719.91	1.60131	1.14486	55	33			62.2673	37.7327			3.11407	Back Stutter	8.72412	Forward Stutter	6.43076	102	0.136839	0.0752518			0.0035037	0.00304903
2.8.0	9-1_63pg_Set 1 Amp 1_rep-770696	2	2281466	6310.77	1.37564	1.07035	56	33			62.4535	37.5465			3.53429	Back Stutter	9.89691	Forward Stutter	5.85468	102	0.152853	0.056689			0.0040391	0.00207705
2.8.0	9-1_63pg_Set 1 Amp 1_rep-850671	2	2181896	6264.46	1.07273	1.19407	54	33			62.2257	37.7743			3.04638	Back Stutter	9.59431	Forward Stutter	6.74424	102	0.132869	0.077441			0.00351265	0.00316998
2.8.0	9-1_63pg_Set 1 Amp 2	2	2987985	5133.71	6.1222	1.06784	93	17			84.6007	15.3993			3.42305	Back Stutter	8.78449	Forward Stutter	4.94046	102	0.0956185	0.047238			0.00115853	0.00430198
2.8.0	9-1_63pg_Set 1 Amp 2_rep-72994	2	3277375	4013.18	8.18038	1.10381	93	21			81.8744	18.1256			3.05252	Back Stutter	7.34027	Forward Stutter	5.94823	102	0.104249	0.0553573			0.0012763	0.00434761
2.8.0	9-1_63pg_Set 1 Amp 2_rep-363864	2	2813153	4198.06	6.3935	1.12663	95	18			84.2582	15.7418			3.48412	Back Stutter	7.53346	Forward Stutter	5.2128	102	0.10773	0.0528345			0.00130132	0.00481418
2.8.0	9-1_63pg_Set 1 Amp 2_rep-403455	2	3430290	7637.2	6.89863	1.06233	95	20			82.6974	17.3026			3.12741	Back Stutter	9.76852	Forward Stutter	5.39595	102	0.0976143	0.0557177			0.00115372	0.00443482
2.8.0	9-1_63pg_Set 1 Amp 2_rep-440935	2	3380740	3684.38	6.75749	1.0306	93	19			83.1744	16.8256			3.37931	Back Stutter	7.44504	Forward Stutter	7.48152	102	0.0854848	0.0541779			0.00101994	0.00464563
2.8.0	9-1_63pg_Set 1 Amp 2_rep-511845	2	3091993	2714.39	6.82976	1.06581	95	18			84.4095	15.5905			3.06369	Back Stutter	9.22167	Forward Stutter	5.60438	102	0.104109	0.0495998			0.0012379	0.00437672
2.8.0	9-1_63pg_Set 1 Amp 2_rep-537631	2	2709737	2845.36	7.373	1.06712	99	18			84.2859	15.7141			3.23824	Back Stutter	10.1457	Forward Stutter	4.74114	102	0.127594	0.0600351			0.0015048	0.0056043
2.8.0	9-1_63pg_Set 1 Amp 2_rep-553752	2	3215870	6229.8	5.98724	1.07306	91	21			81.4082	18.5918			3.80568	Back Stutter	8.38038	Forward Stutter	4.04535	102	0.106574	0.0545322			0.0013491	0.00401178
2.8.0	9-1_63pg_Set 1 Amp 2_rep-770696	2	2986488	3548.19	6.40734	1.07399	93	17			84.9861	15.0139			3.35306	Back Stutter	8.18294	Forward Stutter	6.61739	102	0.0919892	0.0507007			0.00110208	0.0049631
2.8.0	9-1_63pg_Set 1 Amp 2_rep-850671	2	2862035	5569.43	6.70277	1.13975	95	18			84.3605	15.6395			3.19665	Back Stutter	8.93486	Forward Stutter	6.85785	102	0.116325	0.0530684			0.00140456	0.00492022
2.8.0	9-1_125pg_Set 1 Amp 1	2	3622624	13941.9	10.1317	1.07255	122	40			75.4036	24.5964			3.75277	Back Stutter	8.35024	Forward Stutter	8.44682	85	0.141152	0.0760289			0.001335	0.00239416
2.8.0	9-1_125pg_Set 1 Amp 1_rep-72994	2	3370500	11461.4	9.4689	1.18512	125	43			74.4837	25.5163			3.82621	Back Stutter	7.49008	Forward Stutter	6.34317	85	0.166727	0.10045			0.00153735	0.00315882
2.8.0	9-1_125pg_Set 1 Amp 1_rep-363864	2	3902057	10419.6	9.88566	1.33664	119	44			73.403	26.597			4.51161	Back Stutter	6.946	Forward Stutter	6.51433	85	0.161307	0.0915296			0.00169662	0.00271231
2.8.0	9-1_125pg_Set 1 Amp 1_rep-403455	2	3106897	10924.4	10.5073	1.10265	125	44			73.8482	26.1518			4.0985	Back Stutter	8.04124	Forward Stutter	6.19255	85	0.160781	0.113262			0.00147909	0.0035476
2.8.0	9-1_125pg_Set 1 Amp 1_rep-440935	2	3954246	16034.5	10.2503	1.26927	125	44			73.9449	26.0551			4.43416	Back Stutter	10.0108	Forward Stutter	5.58721	85	0.166497	0.097751			0.00155387	0.00294805
2.8.0	9-1_125pg_Set 1 Amp 1_rep-511845	2	3218057	14808.4	10.0769	1.13971	125	42			75.0482	24.9518			3.74895	Back Stutter	8.29166	Forward Stutter	5.71038	85	0.156485	0.102908			0.00144701	0.0034701
2.8.0	9-1_125pg_Set 1 Amp 1_rep-537631	2	3528087	10485.5	9.67797	1.16429	123	38			76.497	23.503			3.53192	Back Stutter	6.38974	Forward Stutter	5.90315	85	0.165598	0.0701388			0.00164006	0.00224873
2.8.0	9-1_125pg_Set 1 Amp 1_rep-553752	2	3447466	9537.77	10.3484	1.17689	126	39			76.4974	23.5026			3.66948	Back Stutter	9.29813	Forward Stutter	5.47384	85	0.171384	0.0875018			0.00160855	0.00301229
2.8.0	9-1_125pg_Set 1 Amp 1_rep-770696	2	3173630	6725.34	11.1439	1.07805	123	44			73.7169	26.2831			4.1949	Back Stutter	6.37292	Forward Stutter	7.06014	85	0.134659	0.108558			0.00124144	0.00347683
2.8.0	9-1_125pg_Set 1 Amp 1_rep-850671	2	3369624	12953	10.1297	1.1543	121	39			75.7858	24.2142			3.53542	Back Stutter	8.94773	Forward Stutter	6.65245	85	0.128164	0.0861224			0.00119839	0.00296088
2.8.0	9-1_125pg_Set 1 Amp 2	2	4659479	10776.6	14.1297	1.10738	154	41			78.8721	21.1279			2.96702	Back Stutter	10.5752	Forward Stutter	6.86256	97	0.232095	0.0946194			0.00179302	0.00303365
2.8.0	9-1_125pg_Set 1 Amp 2_rep-72994	2	5275018	12851.4	14.7617	1.159	151	41			78.7447	21.2553			2.71963	Back Stutter	9.5588	Forward Stutter	5.63836	97	0.2696	0.06797			0.0023577	0.0021526
2.8.0	9-1_125pg_Set 1 Amp 2_rep-363864	2	4248308	10071.8	14.5381	1.18121	156	41			79.3864	20.6136			2.9799	Back Stutter	8.54046	Forward Stutter	5.9025	97	0.252253	0.0849852			0.00196924	0.00268961
2.8.0	9-1_125pg_Set 1 Amp 2_rep-403455	2	4808776	8299.14	13.5615	1.08468	158	43			78.5235	21.4765			3.12297	Back Stutter	12.2664	Forward Stutter	6.38645	97	0.261435	0.100511			0.00200535	0.00303643
2.8.0	9-1_125pg_Set 1 Amp 2_rep-440935	2	4166696	7630.47	15.3641	1.11943	156	41			79.28	20.72			3.21026	Back Stutter	7.50404	Forward Stutter	5.4568	97	0.254532	0.080872			0.0020022	0.00243059
2.8.0	9-1_125pg_Set 1 Amp 2_rep-511845	2	4489122	11005.3	14.4455	1.09461	166	41			80.0015	19.9985			3.1076	Back Stutter	5.87931	Forward Stutter	6.61791	97	0.299408	0.0905477			0.00225912	0.00286407
2.8.0	9-1_125pg_Set 1 Amp 2_rep-537631	2	5340413	14642.3	15.8748	1.18206	160	39			80.4195	19.5805			3.08537	Back Stutter	6.82158	Forward Stutter	5.88878	97	0.249277	0.0700342			0.00187945	0.00222859
2.8.0	9-1_125pg_Set 1 Amp 2_rep-553752	2	4009810	9494.27	14.4527	1.09908	149	40			78.9795	21.0205			3.13425	Back Stutter	10.468	Forward Stutter	5.49062	97	0.233344	0.0830679			0.00187817	0.0026295
2.8.0	9-1_125pg_Set 1 Amp 2_rep-770696	2	4293919	14456.7	13.659	1.04283	161	36			81.5411	18.4589			3.09744	Back Stutter	10.9971	Forward Stutter	6.02778	97	0.277508	0.0684206			0.00211212	0.00235349
2.8.0	9-1_125pg_Set 1 Amp 2_rep-850671	2	4614010	11443.6	15.7627	1.07751	151	40			78.8401	21.1599			3.05117	Back Stutter	9.7773	Forward Stutter	10.0703	97	0.204566	0.0850406			0.00156932	0.00266871
2.8.0	9-1_250pg_Set 1 Amp 1	2	3899678	10624.8	19.6389	1.09202	252	53			82.7936	17.2064			3.27348	Back Stutter	6.18214	Forward Stutter	7.70665	97	0.287058	0.12976			0.00128805	0.00325809
2.8.0	9-1_250pg_Set 1 Amp 1_rep-72994	2	3811536	13643.2	19.267	1.04938	249	53			82.4577	17.5423			3.04262	Back Stutter	6.86236	Forward Stutter	6.59377	97	0.287275	0.131308			0.00131754	0.00341473
2.8.0	9-1_250pg_Set 1 Amp 1_rep-363864	2	3651037	11382.2	17.6058	1.0979	258	50			83.7063	16.2937			3.02495	Back Stutter	5.60294	Forward Stutter	9.42665	97	0.328671	0.114666			0.00147957	0.00300598
2.8.0	9-1_250pg_Set 1 Amp 1_rep-403455	2	3838517	14016.5	18.668	1.08701	269	49			84.665	15.335			3.08762	Back Stutter	5.77349	Forward Stutter	6.21982	97	0.365721	0.104963			0.00159078	0.00277318
2.8.0	9-1_250pg_Set 1 Amp 1_rep-440935	2	4175476	11390.1	18.14	1.10938	263	50			84.1568	15.8432			3.14981	Back Stutter	7.02306	Forward Stutter	5.91075	97	0.315229	0.110014			0.00137168	0.00287434
2.8.0	9-1_250pg_Set 1 Amp 1_rep-511845	2	4024811	11080.4	19.0905	1.06314	259	54			82.6728	17.3272			3.04621	Back Stutter	5.15187	Forward Stutter	5.62665	97	0.313377	0.136767			0.00138699	0.00342456
2.8.0	9-1_250pg_Set 1 Amp 1_rep-537631	2	3985559	10385.7	19.177	1.06384	255	52			83.1674	16.8326			3.1174	Back Stutter	5.42297	Forward Stutter	5.25642	97	0.293234	0.122623			0.00130888	0.00312412
2.8.0	9-1_250pg_Set 1 Amp 1_rep-553752	2	3739875	10864.3	18.5921	1.14087	259	54			82.7146	17.2854			3.34212	Back Stutter	4.53311	Forward Stutter	7.86295	97	0.336614	0.136135			0.00149622	0.00344112
2.8.0	9-1_250pg_Set 1 Amp 1_rep-770696	2	4155305	10781.1	18.868	1.15475	255	53			82.8633	17.1367			3.11027	Back Stutter	7.63227	Forward Stutter	6.07271	97	0.275464	0.126872			0.00121774	0.003176
2.8.0	9-1_250pg_Set 1 Amp 1_rep-850671	2	4059871	12500.7	18.5827	1.15828	250	49			83.5625	16.4375			3.04287	Back Stutter	7.45729	Forward Stutter	6.56543	97	0.271335	0.109817			0.00123209	0.00291343
2.8.0	9-1_250pg_Set 1 Amp 2	2	4650628	14769.6	23.6937	1.01897	331	40			89.2644	10.7356			2.49125	Back Stutter	5.29663	Forward Stutter	6.10961	89	0.325121	0.055764			0.00109295	0.00164333
2.8.0	9-1_250pg_Set 1 Amp 2_rep-72994	2	4700331	7309.35	24.2709	1.02465	328	39			89.4831	10.5169			2.53925	Back Stutter	5.04459	Forward Stutter	6.84934	89	0.298384	0.0470096			0.00100273	0.00139651
2.8.0	9-1_250pg_Set 1 Amp 2_rep-363864	2	4427519	10803.3	24.4759	1.04933	323	38			89.5328	10.4672			2.62222	Back Stutter	5.14032	Forward Stutter	7.64449	89	0.312229	0.0465163			0.00107437	0.00142018
2.8.0	9-1_250pg_Set 1 Amp 2_rep-403455	2	5528410	16978.4	24.1097	1.06831	325	38			89.4787	10.5213			2.66025	Back Stutter	4.81508	Forward Stutter	7.58603	89	0.281824	0.0457391			0.000952069	0.00136561
2.8.0	9-1_250pg_Set 1 Amp 2_rep-440935	2	4909799	15479.9	24.0519	1.02339	327	38			89.5113	10.4887			2.61803	Back Stutter	5.83103	Forward Stutter	5.79483	89	0.281907	0.0451185			0.000945413	0.00134056
2.8.0	9-1_250pg_Set 1 Amp 2_rep-511845	2	5361950	13387.2	24.2908	1.05259	323	37			89.6032	10.3968			2.47706	Back Stutter	4.98224	Forward Stutter	5.50802	89	0.290384	0.0436851			0.000992366	0.00132519
2.8.0	9-1_250pg_Set 1 Amp 2_rep-537631	2	4863221	14640.8	24.207	1.05452	331	38			89.5992	10.4008			2.66157	Back Stutter	4.97434	Forward Stutter	5.6843	89	0.34307	0.0493892			0.00115999	0.00148322
2.8.0	9-1_250pg_Set 1 Amp 2_rep-553752	2	4681320	6674.04	24.3637	1.01725	320	38			89.4662	10.5338			2.70039	Back Stutter	5.04078	Forward Stutter	5.42741	89	0.27057	0.0451676			0.000924642	0.00136585
2.8.0	9-1_250pg_Set 1 Amp 2_rep-770696	2	4874094	7655.89	23.7739	1.04106	325	38			89.6275	10.3725			2.60909	Back Stutter	4.9083	Forward Stutter	6.52576	89	0.310764	0.0452212			0.00106071	0.00137436
2.8.0	9-1_250pg_Set 1 Amp 2_rep-850671	2	4654608	12525.2	23.8448	1.07377	334	39			89.5913	10.4087			2.66059	Back Stutter	5.33285	Forward Stutter	7.4502	89	0.360347	0.0506044			0.00121312	0.00150314
2.8.0	9-1_380pg_Set 1 Amp 1	2	4685607	12560.2	31.9437	1.06882	604	58			91.2685	8.73148			2.43973	Back Stutter	3.47566	Forward Stutter	5.53258	85	1.06677	0.0376775			0.00219216	0.000702982
2.8.0	9-1_380pg_Set 1 Amp 1_rep-72994	2	5042333	14850.6	32.004	1.04828	599	58			91.0908	8.90923			2.30725	Back Stutter	3.42307	Forward Stutter	5.32943	85	0.959277	0.0322715			0.00193164	0.000584516
2.8.0	9-1_380pg_Set 1 Amp 1_rep-363864	2	5333605	9102.97	32.5186	1.02427	592	58			91.0634	8.93664			2.30689	Back Stutter	3.55725	Forward Stutter	7.5548	85	0.960329	0.0341819			0.00196673	0.000626495
2.8.0	9-1_380pg_Set 1 Amp 1_rep-403455	2	5356890	11262.4	31.867	1.09149	611	60			91.0051	8.99487			2.40172	Back Stutter	3.48609	Forward Stutter	6.83484	85	0.99532	0.0388516			0.00197461	0.000696522
2.8.0	9-1_380pg_Set 1 Amp 1_rep-440935	2	4734613	10252.6	32.3023	1.02821	597	59			90.9893	9.01073			2.38135	Back Stutter	3.83706	Forward Stutter	6.11455	85	0.959669	0.0374588			0.00193957	0.000678538
2.8.0	9-1_380pg_Set 1 Amp 1_rep-511845	2	5065168	12902.5	32.0643	1.04175	584	58			90.9461	9.05391			2.49395	Back Stutter	3.31584	Forward Stutter	6.49572	85	0.917016	0.0376799			0.00188688	0.000690727
2.8.0	9-1_380pg_Set 1 Amp 1_rep-537631	2	5135345	12518.9	32.3444	1.05026	592	60			90.8241	9.17593			2.4746	Back Stutter	3.72288	Forward Stutter	5.75398	85	0.871045	0.0352751			0.00174641	0.000628134
2.8.0	9-1_380pg_Set 1 Amp 1_rep-553752	2	4927991	15735.1	32.269	1.05338	604	59			91.0898	8.91023			2.28666	Back Stutter	3.29476	Forward Stutter	5.50633	85	1.00515	0.0366307			0.00203022	0.000662972
2.8.0	9-1_380pg_Set 1 Amp 1_rep-770696	2	5045960	15143.8	32.4808	1.03922	592	59			90.9244	9.07565			2.44854	Back Stutter	3.20904	Forward Stutter	6.35408	85	0.914575	0.0350649			0.00184769	0.000629986
2.8.0	9-1_380pg_Set 1 Amp 1_rep-850671	2	5360132	20804.3	32.1936	1.04759	583	59			90.8048	9.19518			2.43808	Back Stutter	3.47009	Forward Stutter	7.18741	85	0.8459	0.0339046			0.00171652	0.000610319
2.8.0	9-1_380pg_Set 1 Amp 2	2	3247659	11361.9	20.9284	1.05472	385	53			87.9984	12.0016			3.21709	Back Stutter	4.43937	Forward Stutter	6.96244	89	0.578955	0.068093			0.00178575	0.00149269
2.8.0	9-1_380pg_Set 1 Amp 2_rep-72994	2	3363563	11211.5	21.166	1.08212	377	50			88.258	11.742			3.26206	Back Stutter	5.58432	Forward Stutter	5.44243	89	0.581405	0.0619186			0.00183824	0.0014196
2.8.0	9-1_380pg_Set 1 Amp 2_rep-363864	2	3259806	10828.2	20.7329	1.10281	390	52			88.206	11.794			3.31705	Back Stutter	4.69264	Forward Stutter	5.61067	89	0.661031	0.0731976			0.00208073	0.00165142
2.8.0	9-1_380pg_Set 1 Amp 2_rep-403455	2	3216616	9305.9	20.9318	1.06638	390	53			88.1223	11.8777			3.43531	Back Stutter	5.24315	Forward Stutter	5.08982	89	0.613233	0.0695927			0.00189247	0.0015388
2.8.0	9-1_380pg_Set 1 Amp 2_rep-440935	2	3424718	9644.75	20.602	1.15377	393	53			88.1211	11.8789			3.24033	Back Stutter	5.35844	Forward Stutter	7.47449	89	0.611348	0.068622			0.00186705	0.0014957
2.8.0	9-1_380pg_Set 1 Amp 2_rep-511845	2	3242534	6851.12	20.9756	1.10619	384	51			88.2309	11.7691			3.37019	Back Stutter	4.40316	Forward Stutter	7.6207	89	0.584108	0.0636447			0.00180964	0.00142911
2.8.0	9-1_380pg_Set 1 Amp 2_rep-537631	2	2973170	11973.6	20.9003	1.03126	392	53			88.1528	11.8472			3.04494	Back Stutter	5.46069	Forward Stutter	7.18494	89	0.626209	0.0669577			0.00193032	0.00147189
2.8.0	9-1_380pg_Set 1 Amp 2_rep-553752	2	3656537	12220.8	20.7177	1.04994	367	50			88.0839	11.9161			3.33531	Back Stutter	6.05214	Forward Stutter	4.43596	89	0.5371	0.06074			0.00174074	0.00140208
2.8.0	9-1_380pg_Set 1 Amp 2_rep-770696	2	3171433	8227.32	20.928	1.04051	384	51			88.296	11.704			3.53213	Back Stutter	4.25489	Forward Stutter	6.10905	89	0.601465	0.0640176			0.00187463	0.00144886
2.8.0	9-1_380pg_Set 1 Amp 2_rep-850671	2	3144007	12320.3	19.8957	1.07771	385	50			88.5786	11.4214			3.27599	Back Stutter	4.27454	Forward Stutter	6.74711	89	0.640377	0.058521			0.0020336	0.00135044
2.8.0	9-1_500pg_Set 1 Amp 1	2	4430580	14166.3	26.2387	1.03878	524	80			86.7041	13.2959			3.6135	Back Stutter	4.49829	Forward Stutter	5.52851	85	0.521299	0.170711			0.00110913	0.00276676
2.8.0	9-1_500pg_Set 1 Amp 1_rep-72994	2	4385272	17952.8	24.4446	1.01986	522	78			86.9767	13.0233			3.37078	Back Stutter	5.60182	Forward Stutter	6.52116	85	0.49192	0.154269			0.0010449	0.00250669
2.8.0	9-1_500pg_Set 1 Amp 1_rep-363864	2	4714724	14977.3	25.2732	1.03126	526	79			86.9129	13.0871			3.38512	Back Stutter	5.85355	Forward Stutter	6.79757	85	0.536223	0.162283			0.00114285	0.00264803
2.8.0	9-1_500pg_Set 1 Amp 1_rep-403455	2	4576906	11410.2	24.5312	1.04826	516	79			86.7506	13.2494			3.35544	Back Stutter	5.93815	Forward Stutter	8.31108	85	0.513369	0.163817			0.00110597	0.00268832
2.8.0	9-1_500pg_Set 1 Amp 1_rep-440935	2	4005840	14055.2	24.3951	1.10461	505	76			86.9192	13.0808			3.62651	Back Stutter	5.6041	Forward Stutter	6.06426	85	0.571472	0.163044			0.00128249	0.00279613
2.8.0	9-1_500pg_Set 1 Amp 1_rep-511845	2	4656454	17633	25.3736	1.08752	511	79			86.6517	13.3483			3.62669	Back Stutter	5.91592	Forward Stutter	5.55933	85	0.478809	0.166079			0.00103556	0.00273691
2.8.0	9-1_500pg_Set 1 Amp 1_rep-537631	2	4253558	12579	24.6638	1.08369	495	75			86.8189	13.1811			3.34901	Back Stutter	5.18589	Forward Stutter	6.59946	85	0.43671	0.147892			0.000968534	0.00251338
2.8.0	9-1_500pg_Set 1 Amp 1_rep-553752	2	3924894	17166	24.4159	1.06335	510	78			86.7062	13.2938			3.66411	Back Stutter	4.92049	Forward Stutter	4.93987	85	0.504521	0.167118			0.00109974	0.00277681
2.8.0	9-1_500pg_Set 1 Amp 1_rep-770696	2	4114674	8742.82	24.8319	1.07456	506	75			87.1183	12.8817			3.29189	Back Stutter	6.24132	Forward Stutter	5.97393	85	0.558526	0.149453			0.00125025	0.002557
2.8.0	9-1_500pg_Set 1 Amp 1_rep-850671	2	4358193	9384.85	24.3005	1.01781	518	78			86.971	13.029			3.59963	Back Stutter	5.72483	Forward Stutter	6.95114	85	0.550426	0.161743			0.001195	0.00268975
2.8.0	9-1_500pg_Set 1 Amp 2	2	6881022	13313.4	26.5496	1.0895	609	76			88.9132	11.0868			5.06317	Back Stutter	3.40888	Forward Stutter	5.74036	85	0.766372	0.0690671			0.00145282	0.00100427
2.8.0	9-1_500pg_Set 1 Amp 2_rep-72994	2	7472231	16539	25.8539	1.06743	606	75			88.9329	11.0671			5.18888	Back Stutter	3.72765	Forward Stutter	6.70275	85	0.743157	0.0635932			0.00140722	0.00092336
2.8.0	9-1_500pg_Set 1 Amp 2_rep-363864	2	6750274	11428.9	25.5915	1.14257	610	74			89.1668	10.8332			4.97532	Back Stutter	3.49901	Forward Stutter	6.22674	85	0.868136	0.0700941			0.00167938	0.00105102
2.8.0	9-1_500pg_Set 1 Amp 2_rep-403455	2	7162375	11536.6	25.6589	1.15319	622	77			89.0078	10.9922			5.02265	Back Stutter	3.44258	Forward Stutter	8.57764	85	0.84352	0.0729563			0.00158177	0.00105579
2.8.0	9-1_500pg_Set 1 Amp 2_rep-440935	2	6577334	10519	24.7607	1.03187	596	74			88.9215	11.0785			5.42431	Back Stutter	3.67877	Forward Stutter	6.0476	85	0.780169	0.0718723			0.00151871	0.001079
2.8.0	9-1_500pg_Set 1 Amp 2_rep-511845	2	6596596	19640.3	26.0209	1.07623	622	77			88.9991	11.0009			4.93444	Back Stutter	3.34717	Forward Stutter	9.02246	85	0.828138	0.0707348			0.00155211	0.00101756
2.8.0	9-1_500pg_Set 1 Amp 2_rep-537631	2	7534433	13490	25.5693	1.12857	613	76			88.9257	11.0743			4.79106	Back Stutter	3.61701	Forward Stutter	6.28133	85	0.784151	0.0693846			0.00148202	0.0010077
2.8.0	9-1_500pg_Set 1 Amp 2_rep-553752	2	6704033	8722.09	25.1611	1.13473	607	74			89.0665	10.9335			4.8842	Back Stutter	3.54054	Forward Stutter	7.56559	85	0.835095	0.06989			0.0016198	0.00104787
2.8.0	9-1_500pg_Set 1 Amp 2_rep-770696	2	7335060	10767.7	25.378	1.04281	611	76			88.9753	11.0247			5.05614	Back Stutter	3.88479	Forward Stutter	4.90503	85	0.761917	0.0652633			0.00143385	0.000944389
2.8.0	9-1_500pg_Set 1 Amp 2_rep-850671	2	6770901	12958.1	25.5304	1.08548	605	74			89.055	10.945			4.77641	Back Stutter	3.48198	Forward Stutter	5.46539	85	0.788466	0.0634706			0.00151195	0.000940021
2.8.0	9-1_750pg_Set 1 Amp 1	2	8205033	9049.48	45.0413	1.01101	904	158			85.1255	14.8745			2.34084	Back Stutter	3.463	Forward Stutter	4.39415	85	0.797226	0.339195			0.000971999	0.00280928
2.8.0	9-1_750pg_Set 1 Amp 1_rep-72994	2	8849943	15280	44.9778	1.04882	888	153			85.2636	14.7364			2.26682	Back Stutter	3.37056	Forward Stutter	6.28602	85	0.761798	0.320194			0.000944041	0.00270302
2.8.0	9-1_750pg_Set 1 Amp 1_rep-363864	2	8176502	10856.2	44.6007	1.05409	894	156			85.1741	14.8259			2.34145	Back Stutter	3.47364	Forward Stutter	5.40964	85	0.804164	0.334837			0.000994393	0.00281506
2.8.0	9-1_750pg_Set 1 Amp 1_rep-403455	2	7779432	10412.4	44.7936	1.06526	898	156			85.1742	14.8258			2.35293	Back Stutter	3.48322	Forward Stutter	5.99668	85	0.84458	0.339424			0.00104302	0.00284903
2.8.0	9-1_750pg_Set 1 Amp 1_rep-440935	2	8463116	12259.7	44.665	1.02612	899	155			85.281	14.719			2.38217	Back Stutter	3.59916	Forward Stutter	5.14403	85	0.862441	0.333631			0.00106637	0.00281278
2.8.0	9-1_750pg_Set 1 Amp 1_rep-511845	2	8615214	12940.1	44.9348	1.02635	885	154			85.1432	14.8568			2.27907	Back Stutter	3.44234	Forward Stutter	4.49228	85	0.776983	0.331562			0.000967817	0.00280931
2.8.0	9-1_750pg_Set 1 Amp 1_rep-537631	2	8275481	14395.9	44.8999	1.05107	899	156			85.1848	14.8152			2.28449	Back Stutter	3.49954	Forward Stutter	6.32734	85	0.826904	0.336093			0.00101796	0.00281256
2.8.0	9-1_750pg_Set 1 Amp 1_rep-553752	2	8336046	9900.36	44.6032	1.03579	889	154			85.2376	14.7624			2.33706	Back Stutter	3.40605	Forward Stutter	4.83286	85	0.77591	0.324479			0.000961724	0.00273983
2.8.0	9-1_750pg_Set 1 Amp 1_rep-770696	2	8440489	12446.7	44.58	1.04129	892	156			85.1576	14.8424			2.37433	Back Stutter	3.49535	Forward Stutter	6.59619	85	0.811878	0.336116			0.00100386	0.00282883
2.8.0	9-1_750pg_Set 1 Amp 1_rep-850671	2	8735701	18602.9	44.6725	1.0251	899	157			85.1452	14.8548			2.29001	Back Stutter	3.60038	Forward Stutter	5.85031	85	0.796205	0.336306			0.000972039	0.00279544
2.8.0	9-1_750pg_Set 1 Amp 2	2	5056560	8584.98	35.8946	1.0374	721	119			85.7994	14.2006			3.37224	Back Stutter	3.68398	Forward Stutter	6.18134	85	0.689	0.193004			0.00105969	0.00195223
2.8.0	9-1_750pg_Set 1 Amp 2_rep-72994	2	4782460	8455.22	35.7538	1.06073	731	122			85.7204	14.2796			3.68709	Back Stutter	3.65773	Forward Stutter	3.93715	85	0.777685	0.210721			0.00119496	0.0021217
2.8.0	9-1_750pg_Set 1 Amp 2_rep-363864	2	4505059	7297.07	35.5684	1.09168	721	120			85.7524	14.2476			3.39527	Back Stutter	3.72504	Forward Stutter	6.14273	85	0.812514	0.213816			0.00128679	0.00221373
2.8.0	9-1_750pg_Set 1 Amp 2_rep-403455	2	4925018	6528.47	34.8828	1.14527	718	116			86.0296	13.9704			3.71694	Back Stutter	3.64292	Forward Stutter	5.20496	85	0.702722	0.179472			0.00109186	0.0018461
2.8.0	9-1_750pg_Set 1 Amp 2_rep-440935	2	4527775	11921.6	34.706	1.07954	729	119			85.9688	14.0312			3.63159	Back Stutter	3.58032	Forward Stutter	6.81311	85	0.797414	0.198437			0.00123322	0.00202706
2.8.0	9-1_750pg_Set 1 Amp 2_rep-511845	2	4497927	9768.42	34.87	1.06395	719	118			85.8761	14.1239			3.3179	Back Stutter	3.63097	Forward Stutter	6.30985	85	0.75517	0.197997			0.00117856	0.00203626
2.8.0	9-1_750pg_Set 1 Amp 2_rep-537631	2	4967799	9658.44	35.9986	1.08148	711	117			85.823	14.177			3.60853	Back Stutter	3.73464	Forward Stutter	5.22674	85	0.736089	0.196641			0.00117156	0.00204833
2.8.0	9-1_750pg_Set 1 Amp 2_rep-553752	2	5134313	10006	35.4887	1.0629	748	124			85.7775	14.2225			3.35956	Back Stutter	3.62441	Forward Stutter	4.95671	85	0.84198	0.21856			0.00127142	0.00216823
2.8.0	9-1_750pg_Set 1 Amp 2_rep-770696	2	4825144	11287.6	35.0702	1.0245	707	115			85.9848	14.0152			3.37163	Back Stutter	3.79913	Forward Stutter	6.38389	85	0.720104	0.18341			0.00113743	0.00191491
2.8.0	9-1_750pg_Set 1 Amp 2_rep-850671	2	4575049	11936.6	34.8892	1.08454	732	121			85.8647	14.1353			3.44938	Back Stutter	3.71204	Forward Stutter	6.13903	85	0.865403	0.214401			0.00135441	0.00220196
2.8.0	9-1_870pg_Set 1 Amp 1	2	6795875	12605	40.855	1.16871	885	104			89.4576	10.5424			2.95734	Back Stutter	3.05827	Forward Stutter	4.98063	85	1.01697	0.107557			0.00130625	0.0011563
2.8.0	9-1_870pg_Set 1 Amp 1_rep-72994	2	7334519	9548.02	40.8844	1.0397	902	108			89.335	10.665			2.84492	Back Stutter	3.0963	Forward Stutter	6.33475	85	1.01902	0.11561			0.00128056	0.00120722
2.8.0	9-1_870pg_Set 1 Amp 1_rep-363864	2	6798301	18004.3	40.3908	1.05935	884	104			89.4494	10.5506			2.76311	Back Stutter	3.06976	Forward Stutter	6.06001	85	1.13138	0.119865			0.00147796	0.00130702
2.8.0	9-1_870pg_Set 1 Amp 1_rep-403455	2	7191823	11697.9	41.1812	1.15831	861	102			89.4392	10.5608			2.84686	Back Stutter	3.08169	Forward Stutter	5.48745	85	0.976933	0.102923			0.00129639	0.00114164
2.8.0	9-1_870pg_Set 1 Amp 1_rep-440935	2	6844510	15680.3	40.7834	1.08864	886	105			89.38	10.62			2.98819	Back Stutter	3.08888	Forward Stutter	6.59739	85	1.04707	0.117564			0.00135148	0.00126461
2.8.0	9-1_870pg_Set 1 Amp 1_rep-511845	2	6780738	13203.1	40.4632	1.05228	895	105			89.4839	10.5161			2.9322	Back Stutter	3.27668	Forward Stutter	5.07045	85	1.07351	0.112398			0.00137877	0.00120826
2.8.0	9-1_870pg_Set 1 Amp 1_rep-537631	2	7234314	11726.6	39.9867	1.01739	877	104			89.3955	10.6045			2.66143	Back Stutter	3.21399	Forward Stutter	7.63487	85	1.02112	0.109661			0.00132705	0.00118517
2.8.0	9-1_870pg_Set 1 Amp 1_rep-553752	2	6639729	14091.8	40.9786	1.03097	873	103			89.4523	10.5477			2.7302	Back Stutter	3.12787	Forward Stutter	5.61547	85	0.965485	0.100922			0.00124937	0.00109053
2.8.0	9-1_870pg_Set 1 Amp 1_rep-770696	2	7193646	10696.8	40.6592	1.04586	872	103			89.3878	10.6122			2.72552	Back Stutter	3.2256	Forward Stutter	5.64733	85	0.975472	0.106184			0.0012655	0.00114779
2.8.0	9-1_870pg_Set 1 Amp 1_rep-850671	2	7238749	16284.2	41.166	1.03684	890	105			89.4744	10.5256			2.62026	Back Stutter	3.12968	Forward Stutter	5.71433	85	1.03754	0.105846			0.00132597	0.00112903
2.8.0	9-1_870pg_Set 1 Amp 2	2	5684704	15347.6	30.4757	1.06822	959	117			89.1123	10.8877			5.05558	Back Stutter	4.40712	Forward Stutter	5.66179	85	1.29539	0.205193			0.00157484	0.00216269
2.8.0	9-1_870pg_Set 1 Amp 2_rep-72994	2	6238218	7665.1	30.6435	1.08147	969	117			89.1984	10.8016			4.95576	Back Stutter	4.64703	Forward Stutter	5.41397	85	1.38197	0.209341			0.00168101	0.0022084
2.8.0	9-1_870pg_Set 1 Amp 2_rep-363864	2	5842730	10385	29.9827	1.04023	939	112			89.3173	10.6827			4.84283	Back Stutter	4.68029	Forward Stutter	4.94807	85	1.18726	0.179833			0.00145394	0.00192577
2.8.0	9-1_870pg_Set 1 Amp 2_rep-403455	2	5984616	11524.2	30.3884	1.01408	942	115			89.0795	10.9205			5.01479	Back Stutter	4.35444	Forward Stutter	5.74078	85	1.16143	0.195265			0.00141593	0.00206306
2.8.0	9-1_870pg_Set 1 Amp 2_rep-440935	2	5618720	15644.3	29.7952	1.0439	960	117			89.1674	10.8326			4.94214	Back Stutter	4.36192	Forward Stutter	5.97125	85	1.35241	0.20966			0.00165274	0.0022198
2.8.0	9-1_870pg_Set 1 Amp 2_rep-511845	2	5593775	12802	30.9175	1.08478	953	116			89.1717	10.8283			4.78975	Back Stutter	4.1052	Forward Stutter	4.59671	85	1.30148	0.202048			0.00159381	0.00214763
2.8.0	9-1_870pg_Set 1 Amp 2_rep-537631	2	5551934	10674.9	30.2174	1.16646	946	114			89.2134	10.7866			4.95294	Back Stutter	4.33985	Forward Stutter	6.30016	85	1.3537	0.204758			0.00168793	0.0022229
2.8.0	9-1_870pg_Set 1 Amp 2_rep-553752	2	6236457	14627.1	30.9121	1.03197	945	117			89.0179	10.9821			4.57632	Back Stutter	4.45056	Forward Stutter	8.9885	85	1.25661	0.207263			0.00154242	0.00219411
2.8.0	9-1_870pg_Set 1 Amp 2_rep-770696	2	5718017	10363.6	30.92	1.04147	910	113			88.9524	11.0476			4.37726	Back Stutter	4.10237	Forward Stutter	5.0403	85	1.22438	0.20472			0.0015601	0.00224324
2.8.0	9-1_870pg_Set 1 Amp 2_rep-850671	2	5826971	14325.1	30.8859	1.03033	956	114			89.3671	10.6329			4.6562	Back Stutter	4.31429	Forward Stutter	4.43136	85	1.32668	0.190388			0.00162406	0.00203043
2.8.0	49-1_1.9ng_Set 1 Amp 1_rep-72994	2	2745237	10375	37.0866	1.09083	1007	29			97.1589	2.84114			2.57052	Back Stutter	3.98165	Forward Stutter	4.23747	85	1.31198	0.109712			0.0015061	0.0068508
2.8.0	49-1_1.9ng_Set 1 Amp 1_rep-363864	2	2656275	12901.3	36.9424	1.03227	998	29			97.1782	2.82181			2.56127	Back Stutter	3.8696	Forward Stutter	5.102	85	1.35877	0.107485			0.00158606	0.00681546
2.8.0	49-1_1.9ng_Set 1 Amp 1_rep-403455	2	2744384	12593.3	37.2688	1.01422	997	30			97.0565	2.94353			2.51279	Back Stutter	3.94831	Forward Stutter	5.18369	85	1.25796	0.115716			0.0014544	0.00725737
2.8.0	49-1_1.9ng_Set 1 Amp 1_rep-440935	2	2716856	12611.9	37.3339	1.0337	1039	30			97.1469	2.85309			2.46099	Back Stutter	4.28841	Forward Stutter	5.71689	85	1.47293	0.114415			0.00165868	0.00704752
2.8.0	49-1_1.9ng_Set 1 Amp 1_rep-511845	2	2825868	12897.4	37.2219	1.03354	1002	30			97.1254	2.87463			2.54063	Back Stutter	4.21338	Forward Stutter	5.18827	85	1.21186	0.11151			0.00138114	0.00698516
2.8.0	49-1_1.9ng_Set 1 Amp 1_rep-532855	2	2736833	7837.22	36.9043	1.0928	1007	30			97.1442	2.85583			2.56398	Back Stutter	3.87405	Forward Stutter	6.03392	85	1.33541	0.11106			0.00154358	0.00696098
2.8.0	49-1_1.9ng_Set 1 Amp 1_rep-537631	2	2780817	12402.1	37.2387	1.06739	1018	30			97.1311	2.86889			2.55207	Back Stutter	3.92858	Forward Stutter	4.92739	85	1.38192	0.112415			0.00158044	0.00695243
2.8.0	49-1_1.9ng_Set 1 Amp 1_rep-553752	2	2708769	8903.33	37.1502	1.01884	1015	31			97.0781	2.9219			2.41168	Back Stutter	3.81063	Forward Stutter	5.74018	85	1.36864	0.115684			0.00156786	0.00710209
2.8.0	49-1_1.9ng_Set 1 Amp 1_rep-770696	2	2841028	9972.21	36.8316	1.03344	985	28			97.2008	2.79923			2.48412	Back Stutter	3.93601	Forward Stutter	4.795	85	1.18181	0.102448			0.0013698	0.00641622
2.8.0	49-1_1.9ng_Set 1 Amp 1_rep-850671	2	2592959	11519.4	36.6218	1.12017	991	29			97.1429	2.85706			2.63831	Back Stutter	4.11773	Forward Stutter	6.83967	85	1.32765	0.109663			0.00155858	0.0070101
2.8.0	49-1_1.9ng_Set 1 Amp 2_rep-72994	2	5058832	15267.7	44.4748	1.07259	1399	34			97.6339	2.36614			3.62402	Back Stutter	3.67051	Forward Stutter	6.001	98	1.7221	0.0436791			0.0014165	0.00147475
2.8.0	49-1_1.9ng_Set 1 Amp 2_rep-363864	2	4706875	18501.1	44.7172	1.1053	1408	37			97.4603	2.53975			3.79645	Back Stutter	3.65267	Forward Stutter	7.03492	98	1.79353	0.0605998			0.00147357	0.00200329
2.8.0	49-1_1.9ng_Set 1 Amp 2_rep-403455	2	4914000	11710.6	44.8691	1.04669	1381	35			97.5193	2.48066			3.79475	Back Stutter	3.61027	Forward Stutter	5.77853	98	1.6398	0.0524806			0.0013534	0.00176034
2.8.0	49-1_1.9ng_Set 1 Amp 2_rep-440935	2	4946472	22090.8	44.8568	1.07595	1393	35			97.536	2.464			4.02311	Back Stutter	3.70648	Forward Stutter	5.77462	98	1.59858	0.0520739			0.00130276	0.00172254
2.8.0	49-1_1.9ng_Set 1 Amp 2_rep-511845	2	5033545	20830	45.5146	1.13295	1398	37			97.4287	2.57128			3.69143	Back Stutter	3.66382	Forward Stutter	5.26778	98	1.70846	0.0565596			0.00139835	0.00181466
2.8.0	49-1_1.9ng_Set 1 Amp 2_rep-532855	2	4501877	9585.99	45.8393	1.02469	1377	36			97.4657	2.53428			4.02132	Back Stutter	3.66276	Forward Stutter	6.03065	98	1.74054	0.0601837			0.0014607	0.00203629
2.8.0	49-1_1.9ng_Set 1 Amp 2_rep-537631	2	4532799	16375.9	44.5123	1.0541	1390	33			97.698	2.30205			4.50711	Back Stutter	3.58821	Forward Stutter	5.3904	98	1.74434	0.0459296			0.00144272	0.00163859
2.8.0	49-1_1.9ng_Set 1 Amp 2_rep-553752	2	4839969	14201	44.3071	1.05462	1379	33			97.6341	2.36588			3.79029	Back Stutter	3.70312	Forward Stutter	7.09362	98	1.74429	0.04453			0.00145604	0.00154831
2.8.0	49-1_1.9ng_Set 1 Amp 2_rep-770696	2	4917158	23275.1	45.4275	1.06866	1438	38			97.4373	2.56269			3.77027	Back Stutter	3.69091	Forward Stutter	7.15252	98	1.90973	0.0638407			0.00154949	0.00201979
2.8.0	49-1_1.9ng_Set 1 Amp 2_rep-850671	2	4922437	15451.6	45.8714	1.07485	1398	36			97.4859	2.51414			3.93669	Back Stutter	3.59355	Forward Stutter	6.49686	98	1.64087	0.0562138			0.00134209	0.00184952
2.8.0	49-1_1.25ng_Set 1 Amp 1_rep-72994	2	2137148	8967.94	25.4562	1.18113	623	13			97.8854	2.11461			2.72923	Back Stutter	7.01904	Forward Stutter	5.96037	97	0.788481	0.0460574			0.00145672	0.00583251
2.8.0	49-1_1.25ng_Set 1 Amp 1_rep-363864	2	1832080	9003.73	25.1977	1.09308	620	12			98.0232	1.97677			2.88295	Back Stutter	6.6493	Forward Stutter	5.74755	97	0.799051	0.0392298			0.0014901	0.00500926
2.8.0	49-1_1.25ng_Set 1 Amp 1_rep-403455	2	1740450	8753.58	25.7082	1.1185	617	13			97.8919	2.1081			3.03842	Back Stutter	7.51937	Forward Stutter	5.56406	97	0.782143	0.0459544			0.00146287	0.00603024
2.8.0	49-1_1.25ng_Set 1 Amp 1_rep-440935	2	1679566	7500.16	25.3119	1.08172	610	14			97.765	2.23497			2.82969	Back Stutter	6.80942	Forward Stutter	6.08686	97	0.762737	0.0517138			0.00144903	0.00675831
2.8.0	49-1_1.25ng_Set 1 Amp 1_rep-511845	2	1798096	7173.29	25.2847	1.10685	617	12			98.0702	1.92983			2.7106	Back Stutter	7.45431	Forward Stutter	6.12376	97	0.833828	0.0377164			0.00159428	0.00492615
2.8.0	49-1_1.25ng_Set 1 Amp 1_rep-532855	2	1769441	4584.98	24.7921	1.06459	609	12			98.0287	1.97129			2.82805	Back Stutter	7.39326	Forward Stutter	7.11245	97	0.775722	0.0384734			0.00146571	0.00497592
2.8.0	49-1_1.25ng_Set 1 Amp 1_rep-537631	2	1752828	7054.57	25.1646	1.04066	610	12			98.0178	1.98218			2.78035	Back Stutter	6.8806	Forward Stutter	6.08623	97	0.84599	0.0400165			0.00164067	0.00527317
2.8.0	49-1_1.25ng_Set 1 Amp 1_rep-553752	2	1761852	6330	25.2305	1.18979	617	12			98.0141	1.98593			2.71329	Back Stutter	7.05811	Forward Stutter	5.28175	97	0.84355	0.0403792			0.00158806	0.00529066
2.8.0	49-1_1.25ng_Set 1 Amp 1_rep-770696	2	1872006	5434.59	26.0885	1.15065	629	13			98.0304	1.96961			3.04208	Back Stutter	7.1038	Forward Stutter	7.0062	97	0.806174	0.0393316			0.00147742	0.00491718
2.8.0	49-1_1.25ng_Set 1 Amp 1_rep-850671	2	1776648	7380	25.3615	1.08323	642	13			98.0201	1.97989			2.85414	Back Stutter	7.55616	Forward Stutter	6.03945	97	0.851565	0.0424082			0.0015359	0.00531755
2.8.0	49-1_1.25ng_Set 1 Amp 2_rep-72994	2	2393786	11418.1	29.1643	1.14991	566	22			96.176	3.82399			2.67566	Back Stutter	3.78928	Forward Stutter	6.32725	97	0.550063	0.061043			0.00107894	0.0039454
2.8.0	49-1_1.25ng_Set 1 Amp 2_rep-363864	2	2430903	6220.98	29.5863	1.05801	579	22			96.324	3.67596			3.1147	Back Stutter	3.88222	Forward Stutter	5.84155	97	0.572039	0.0578372			0.00110425	0.00373745
2.8.0	49-1_1.25ng_Set 1 Amp 2_rep-403455	2	2485446	7421.75	29.665	1.05971	584	21			96.4597	3.54028			2.83737	Back Stutter	3.62963	Forward Stutter	6.40503	97	0.603697	0.0520796			0.00115646	0.00333425
2.8.0	49-1_1.25ng_Set 1 Amp 2_rep-440935	2	2363887	7798.88	28.9984	1.06111	577	22			96.3908	3.60922			2.79652	Back Stutter	4.52987	Forward Stutter	6.22345	97	0.59865	0.0583361			0.00115356	0.00390635
2.8.0	49-1_1.25ng_Set 1 Amp 2_rep-511845	2	2563121	8520.84	29.2144	1.04548	597	21			96.5384	3.46161			2.79298	Back Stutter	3.53364	Forward Stutter	7.44616	97	0.681278	0.0504826			0.00129419	0.00316137
2.8.0	49-1_1.25ng_Set 1 Amp 2_rep-532855	2	2253426	11299.3	29.1156	1.0149	586	23			96.1904	3.8096			2.72849	Back Stutter	4.83546	Forward Stutter	8.64179	97	0.652035	0.0710645			0.00126263	0.00472092
2.8.0	49-1_1.25ng_Set 1 Amp 2_rep-537631	2	2193624	7427.76	28.9825	1.03304	584	24			96.1167	3.88333			2.98032	Back Stutter	4.10241	Forward Stutter	5.50198	97	0.673928	0.0720145			0.00131287	0.00473605
2.8.0	49-1_1.25ng_Set 1 Amp 2_rep-553752	2	2301239	7060.27	29.6855	1.07478	577	23			96.1449	3.85513			2.70492	Back Stutter	3.80505	Forward Stutter	5.79068	97	0.637992	0.0665454			0.00124059	0.00424059
2.8.0	49-1_1.25ng_Set 1 Amp 2_rep-770696	2	2480543	6453.88	29.5212	1.04656	595	24			96.1682	3.83178			2.54085	Back Stutter	4.27405	Forward Stutter	6.05383	97	0.592599	0.0677978			0.0011118	0.00425321
2.8.0	49-1_1.25ng_Set 1 Amp 2_rep-850671	2	2384062	11545.3	29.7716	1.05586	581	24			96.1027	3.89734			2.74109	Back Stutter	3.63115	Forward Stutter	5.17715	97	0.599995	0.067717			0.00115293	0.00419709
2.8.0	49-1_2.5ng_Set 1 Amp 1_rep-72994	2	9556768	13365.8	48.9634	1.09391	1559	41			97.4555	2.54449			3.05785	Back Stutter	7.70334	Forward Stutter	6.18483	86	1.26848	0.0398103			0.000886969	0.00108879
2.8.0	49-1_2.5ng_Set 1 Amp 1_rep-363864	2	9323402	15327.8	48.2317	1.04224	1528	40			97.4484	2.55161			3.01059	Back Stutter	7.13575	Forward Stutter	6.09061	86	1.28189	0.0395207			0.000917226	0.00109778
2.8.0	49-1_2.5ng_Set 1 Amp 1_rep-403455	2	9517039	12572	48.6322	1.08488	1513	40			97.3948	2.60516			3.06563	Back Stutter	7.45057	Forward Stutter	7.0377	86	1.13097	0.0414648			0.0008088	0.00114911
2.8.0	49-1_2.5ng_Set 1 Amp 1_rep-440935	2	8678787	18965	48.1433	1.1144	1560	40			97.5261	2.47387			3.33071	Back Stutter	7.57681	Forward Stutter	4.5273	86	1.50555	0.0398225			0.00107223	0.00111541
2.8.0	49-1_2.5ng_Set 1 Amp 1_rep-511845	2	9349066	14548.9	47.7862	1.01369	1564	41			97.4591	2.54091			3.00858	Back Stutter	7.49609	Forward Stutter	4.99142	86	1.40457	0.0417696			0.000990109	0.00114754
2.8.0	49-1_2.5ng_Set 1 Amp 1_rep-532855	2	9427376	17875.4	47.9073	1.06031	1575	41			97.4615	2.53849			3.21703	Back Stutter	7.45723	Forward Stutter	4.48508	86	1.31552	0.0415254			0.000916981	0.0011346
2.8.0	49-1_2.5ng_Set 1 Amp 1_rep-537631	2	9501073	14476.5	48.2603	1.03579	1517	40			97.426	2.57404			3.02973	Back Stutter	7.6766	Forward Stutter	4.80625	86	1.16645	0.0387533			0.000834107	0.00107242
2.8.0	49-1_2.5ng_Set 1 Amp 1_rep-553752	2	9433583	18681.1	48.2119	1.01258	1557	42			97.3849	2.61512			2.8585	Back Stutter	7.43299	Forward Stutter	5.43728	86	1.4046	0.0474784			0.00099645	0.00128619
2.8.0	49-1_2.5ng_Set 1 Amp 1_rep-770696	2	9282935	15341.3	48.3741	1.03833	1580	42			97.3847	2.61531			3.1106	Back Stutter	7.22006	Forward Stutter	5.18705	86	1.37673	0.0474383			0.000960231	0.00126317
2.8.0	49-1_2.5ng_Set 1 Amp 1_rep-850671	2	9604010	20702.8	48.936	1.03465	1568	41			97.4226	2.57744			2.88782	Back Stutter	7.38231	Forward Stutter	5.68845	86	1.4056	0.0425615			0.000988335	0.0011517
2.8.0	49-1_2.5ng_Set 1 Amp 2_rep-72994	2	9816949	15745.2	53.9716	1.04955	1709	37			97.8737	2.12634			2.19604	Back Stutter	5.72928	Forward Stutter	5.03972	85	2.29299	0.04468			0.0015564	0.0013723
2.8.0	49-1_2.5ng_Set 1 Amp 2_rep-363864	2	9299854	15870.2	54.0885	1.03639	1780	39			97.8592	2.14081			2.30713	Back Stutter	5.756	Forward Stutter	6.5368	85	2.57441	0.0546199			0.00170603	0.00164948
2.8.0	49-1_2.5ng_Set 1 Amp 2_rep-403455	2	9319192	9824.95	54.3734	1.02209	1763	38			97.8934	2.10655			2.37321	Back Stutter	5.70512	Forward Stutter	4.93594	85	2.48409	0.0482558			0.00165016	0.00145714
2.8.0	49-1_2.5ng_Set 1 Amp 2_rep-440935	2	9390148	15443.4	54.3038	1.0142	1798	39			97.8778	2.12222			2.21216	Back Stutter	5.99175	Forward Stutter	5.09984	85	2.6731	0.0525836			0.00176422	0.00156891
2.8.0	49-1_2.5ng_Set 1 Amp 2_rep-511845	2	10288298	14930.5	54.1705	1.00905	1781	38			97.8939	2.10608			2.18441	Back Stutter	5.7059	Forward Stutter	4.97739	85	2.4698	0.045229			0.00162397	0.00134744
2.8.0	49-1_2.5ng_Set 1 Amp 2_rep-532855	2	9680654	27919	54.1587	1.01905	1778	39			97.864	2.13599			2.28	Back Stutter	5.61185	Forward Stutter	4.3018	85	2.5154	0.0506778			0.00165663	0.00151007
2.8.0	49-1_2.5ng_Set 1 Amp 2_rep-537631	2	9940207	18411.5	54.0442	1.02029	1794	39			97.8692	2.1308			2.12265	Back Stutter	5.80761	Forward Stutter	4.64866	85	2.61186	0.0508915			0.00172217	0.00151327
2.8.0	49-1_2.5ng_Set 1 Amp 2_rep-553752	2	9494997	13434	54.2074	1.15892	1738	38			97.8485	2.15146			2.27421	Back Stutter	6.0841	Forward Stutter	5.07825	85	2.47376	0.0521939			0.00169151	0.00160916
2.8.0	49-1_2.5ng_Set 1 Amp 2_rep-770696	2	9979742	13378.9	54.5837	1.03539	1769	39			97.8384	2.16156			2.1919	Back Stutter	5.69396	Forward Stutter	5.03552	85	2.37383	0.0501768			0.00156526	0.0014849
2.8.0	49-1_2.5ng_Set 1 Amp 2_rep-850671	2	9461369	13694.1	54.4453	1.05797	1765	38			97.8667	2.1333			2.34697	Back Stutter	5.75284	Forward Stutter	5.20135	85	2.40251	0.0496144			0.00158558	0.00148722
2.8.0	49-1_313pg_Set 1 Amp 1_rep-72994	2	1813748	9171.06	14.0567	1.09425	217	16			93.0837	6.91626			3.19925	Back Stutter	6.64746	Forward Stutter	5.85463	97	0.199296	0.0552602			0.00101442	0.00583413
2.8.0	49-1_313pg_Set 1 Amp 1_rep-363864	2	2193688	4775.68	13.9375	1.05183	217	15			93.6352	6.36485			3.29599	Back Stutter	8.09156	Forward Stutter	6.10894	97	0.186542	0.0448868			0.000946834	0.00468795
2.8.0	49-1_313pg_Set 1 Amp 1_rep-403455	2	2202888	3369.71	13.2076	1.11296	212	14			93.624	6.37599			3.61468	Back Stutter	7.91428	Forward Stutter	6.44701	97	0.181455	0.0465741			0.000938073	0.00518614
2.8.0	49-1_313pg_Set 1 Amp 1_rep-440935	2	1653457	5054.08	13.8026	1.12373	216	15			93.5365	6.46352			3.42444	Back Stutter	7.22409	Forward Stutter	6.23347	97	0.203908	0.0504128			0.00104756	0.00563399
2.8.0	49-1_313pg_Set 1 Amp 1_rep-511845	2	1825027	3983.81	13.7874	1.11125	217	15			93.5253	6.47468			3.30604	Back Stutter	6.33161	Forward Stutter	5.15598	97	0.194859	0.0482935			0.000993639	0.00522524
2.8.0	49-1_313pg_Set 1 Amp 1_rep-532855	2	1991233	7582.94	13.3777	1.07705	214	16			93.1957	6.80429			3.23087	Back Stutter	7.28101	Forward Stutter	5.71518	97	0.186803	0.0507588			0.000961087	0.00528324
2.8.0	49-1_313pg_Set 1 Amp 1_rep-537631	2	1979699	6444.44	14.6374	1.08473	218	15			93.3983	6.60166			3.27103	Back Stutter	8.99362	Forward Stutter	6.15501	97	0.199486	0.0523116			0.00101538	0.00573667
2.8.0	49-1_313pg_Set 1 Amp 1_rep-553752	2	1929491	6177.5	13.689	1.09554	212	16			93.142	6.85805			3.00825	Back Stutter	7.87374	Forward Stutter	6.57395	97	0.185475	0.0475058			0.000967178	0.00465289
2.8.0	49-1_313pg_Set 1 Amp 1_rep-770696	2	1832425	4675.31	13.1683	1.13461	218	15			93.6432	6.35678			3.27939	Back Stutter	7.36164	Forward Stutter	5.89095	97	0.210625	0.0485969			0.00107701	0.00536238
2.8.0	49-1_313pg_Set 1 Amp 1_rep-850671	2	1671808	4077.76	13.5486	1.09455	222	14			93.8892	6.11081			3.41954	Back Stutter	8.67496	Forward Stutter	6.28952	97	0.258722	0.0441702			0.00133725	0.00479097
2.8.0	49-1_313pg_Set 1 Amp 2_rep-72994	2	2975698	5257.42	18.0263	1.04282	247	28			89.7814	10.2186			2.90853	Back Stutter	7.92208	Forward Stutter	7.87377	97	0.222398	0.08996			0.000990214	0.00514568
2.8.0	49-1_313pg_Set 1 Amp 2_rep-363864	2	2768075	9629.39	17.3493	1.03994	246	29			89.4395	10.5605			2.94454	Back Stutter	7.30065	Forward Stutter	8.85283	97	0.212921	0.0976963			0.000948771	0.0055631
2.8.0	49-1_313pg_Set 1 Amp 2_rep-403455	2	2452398	3853.62	18.0643	1.11727	250	30			89.2816	10.7184			2.84306	Back Stutter	8.49134	Forward Stutter	6.84229	97	0.229455	0.103901			0.00101021	0.00588834
2.8.0	49-1_313pg_Set 1 Amp 2_rep-440935	2	2502002	8252.93	17.786	1.04899	241	29			89.3291	10.6709			2.63229	Back Stutter	7.837	Forward Stutter	5.88539	97	0.204707	0.0934385			0.000929012	0.00523487
2.8.0	49-1_313pg_Set 1 Amp 2_rep-511845	2	2479907	7807.08	17.7782	1.03503	246	30			89.0223	10.9777			2.67656	Back Stutter	7.68341	Forward Stutter	6.83309	97	0.222681	0.10449			0.000999647	0.00586025
2.8.0	49-1_313pg_Set 1 Amp 2_rep-532855	2	2327953	6842.82	18.3558	1.03103	242	29			89.1655	10.8345			2.67978	Back Stutter	6.57065	Forward Stutter	8.94805	97	0.217205	0.0975119			0.000985222	0.00544933
2.8.0	49-1_313pg_Set 1 Amp 2_rep-537631	2	2365155	4194.7	17.6836	1.04088	242	30			89.1139	10.8861			2.71903	Back Stutter	9.00646	Forward Stutter	6.90748	97	0.22491	0.101615			0.00102751	0.00582512
2.8.0	49-1_313pg_Set 1 Amp 2_rep-553752	2	2526031	7250.79	17.2885	1.03911	238	28			89.4458	10.5542			2.62327	Back Stutter	9.55422	Forward Stutter	5.98407	97	0.190836	0.0908404			0.000875268	0.0052875
2.8.0	49-1_313pg_Set 1 Amp 2_rep-770696	2	2816623	7729.15	17.6789	1.03578	249	30			89.3813	10.6187			2.84781	Back Stutter	7.69469	Forward Stutter	6.23839	97	0.223865	0.10054			0.000989003	0.00571499
2.8.0	49-1_313pg_Set 1 Amp 2_rep-850671	2	2275945	4411.21	17.286	1.0227	247	28			89.6784	10.3216			2.56204	Back Stutter	7.24043	Forward Stutter	8.07441	97	0.244439	0.0912925			0.00110349	0.00516619
2.8.0	49-1_625pg_Set 1 Amp 1_rep-72994	2	1898707	9510.76	15.9299	1.10987	339	22			93.8897	6.1103			3.8917	Back Stutter	4.61669	Forward Stutter	5.23239	97	0.389897	0.0515187			0.00131138	0.00321426
2.8.0	49-1_625pg_Set 1 Amp 1_rep-363864	2	1802840	7189.05	16.4078	1.11361	332	21			93.9644	6.03561			3.52602	Back Stutter	4.9052	Forward Stutter	6.03134	97	0.411075	0.0463011			0.00143229	0.00285464
2.8.0	49-1_625pg_Set 1 Amp 1_rep-403455	2	1854292	4614.39	16.5388	1.0374	343	22			93.9138	6.08622			3.70836	Back Stutter	4.44737	Forward Stutter	6.07422	97	0.421784	0.0480916			0.00141028	0.00279934
2.8.0	49-1_625pg_Set 1 Amp 1_rep-440935	2	2028101	5100.95	17.0941	1.21919	338	22			93.7545	6.24553			3.71519	Back Stutter	4.81484	Forward Stutter	6.58986	97	0.457042	0.057208			0.00157903	0.00356555
2.8.0	49-1_625pg_Set 1 Amp 1_rep-511845	2	1534406	4374.33	15.6883	1.10973	337	20			94.3199	5.68006			3.66075	Back Stutter	4.5189	Forward Stutter	6.47424	97	0.422559	0.0477246			0.00147207	0.00356229
2.8.0	49-1_625pg_Set 1 Amp 1_rep-532855	2	1861371	9499.33	16.1848	1.11171	335	23			93.6583	6.34173			3.87412	Back Stutter	4.53192	Forward Stutter	7.46701	97	0.432482	0.0533783			0.00149326	0.00315689
2.8.0	49-1_625pg_Set 1 Amp 1_rep-537631	2	1852293	5635.15	15.542	1.05488	335	21			94.0375	5.96251			3.77704	Back Stutter	6.11363	Forward Stutter	5.55599	97	0.386487	0.0415053			0.00131103	0.00247612
2.8.0	49-1_625pg_Set 1 Amp 1_rep-553752	2	1801539	6627.31	15.3826	1.16211	355	22			94.3133	5.68668			3.71578	Back Stutter	4.51673	Forward Stutter	7.0593	97	0.511926	0.055857			0.00170148	0.00413736
2.8.0	49-1_625pg_Set 1 Amp 1_rep-770696	2	1790355	5508.09	15.5627	1.08641	338	22			93.9763	6.02368			3.77	Back Stutter	4.70341	Forward Stutter	5.5544	97	0.420849	0.0623366			0.00143934	0.00427347
2.8.0	49-1_625pg_Set 1 Amp 1_rep-850671	2	1702327	4944.47	16.8928	1.12219	344	20			94.6527	5.34728			3.68416	Back Stutter	4.15655	Forward Stutter	6.11817	97	0.441137	0.0390149			0.00148261	0.00259128
2.8.0	49-1_625pg_Set 1 Amp 2_rep-72994	2	2238472	5191.23	19.3081	1.06306	323	17			95.1404	4.85964			3.06217	Back Stutter	6.39415	Forward Stutter	5.26956	97	0.445183	0.0557273			0.00161246	0.00564415
2.8.0	49-1_625pg_Set 1 Amp 2_rep-363864	2	1938767	3776.98	19.4672	1.04049	312	16			95.248	4.75204			2.73048	Back Stutter	5.8333	Forward Stutter	6.83459	97	0.381085	0.0490505			0.00139266	0.00499373
2.8.0	49-1_625pg_Set 1 Amp 2_rep-403455	2	2265361	4159.49	19.5561	1.16893	319	16			95.2765	4.72354			3.09274	Back Stutter	5.74693	Forward Stutter	5.20365	97	0.409994	0.0507056			0.00148439	0.00516627
2.8.0	49-1_625pg_Set 1 Amp 2_rep-440935	2	1990303	5023.65	19.8001	1.03948	315	15			95.3652	4.63483			2.68741	Back Stutter	5.99944	Forward Stutter	7.29337	97	0.414512	0.0470527			0.00152775	0.00480851
2.8.0	49-1_625pg_Set 1 Amp 2_rep-511845	2	2192461	5555.44	19.4817	1.08546	325	16			95.3292	4.67076			2.82547	Back Stutter	5.66256	Forward Stutter	8.93032	97	0.443604	0.0503053			0.00159496	0.00499686
2.8.0	49-1_625pg_Set 1 Amp 2_rep-532855	2	1906747	4273.77	19.1073	1.02891	315	16			95.1535	4.84647			2.70445	Back Stutter	5.95513	Forward Stutter	6.44696	97	0.383356	0.051057			0.00139684	0.00514107
2.8.0	49-1_625pg_Set 1 Amp 2_rep-537631	2	1976432	2867.36	19.3734	1.04841	321	15			95.4143	4.58572			2.752	Back Stutter	7.23371	Forward Stutter	4.55287	97	0.440182	0.0475887			0.00160519	0.00482848
2.8.0	49-1_625pg_Set 1 Amp 2_rep-553752	2	2009895	6246.03	19.898	1.04905	317	16			95.1318	4.86825			2.72763	Back Stutter	5.97005	Forward Stutter	6.27387	97	0.390855	0.0523995			0.00141891	0.00527101
2.8.0	49-1_625pg_Set 1 Amp 2_rep-770696	2	2071233	3495.87	19.7173	1.05947	324	17			94.9911	5.00885			2.7041	Back Stutter	6.73051	Forward Stutter	7.12646	97	0.444905	0.0597451			0.00160514	0.00603806
2.8.0	49-1_625pg_Set 1 Amp 2_rep-850671	2	1890988	5113.84	19.2748	1.0684	324	15			95.4517	4.54834			3.00624	Back Stutter	6.03524	Forward Stutter	5.2428	97	0.472441	0.0476119			0.00172566	0.0048479
2.8.0	99-1_1.25ng_Set 1 Amp 1_rep-28075	2	2864131	9682.93	33.1834	1.04251	726	18			97.6273	2.37267			2.47858	Back Stutter	3.34414	Forward Stutter	6.63181	97	0.933483	0.0530118			0.00148738	0.00460324
2.8.0	99-1_1.25ng_Set 1 Amp 1_rep-60279	2	2853424	8271.29	33.0723	1.0217	705	19			97.4346	2.56539			2.77541	Back Stutter	3.2209	Forward Stutter	5.62037	97	0.778614	0.0613101			0.00124699	0.00543563
2.8.0	99-1_1.25ng_Set 1 Amp 1_rep-67655	2	2959742	8247.66	33.315	1.03909	704	18			97.5564	2.44364			2.48984	Back Stutter	3.16675	Forward Stutter	7.10779	97	0.777775	0.0535484			0.00124819	0.00470565
2.8.0	99-1_1.25ng_Set 1 Amp 1_rep-213976	2	2596070	5660.94	33.006	1.0392	716	18			97.5231	2.47689			3.0008	Back Stutter	3.3522	Forward Stutter	5.12931	97	0.935752	0.0603708			0.0015155	0.00551214
2.8.0	99-1_1.25ng_Set 1 Amp 1_rep-216810	2	2932055	10309.8	33.0362	1.02509	718	17			97.6675	2.33247			2.56228	Back Stutter	3.16894	Forward Stutter	6.17402	97	0.848449	0.050213			0.00134824	0.00443175
2.8.0	99-1_1.25ng_Set 1 Amp 1_rep-723135	2	3015265	8247.39	33.4663	1.05693	719	17			97.6381	2.36195			2.54063	Back Stutter	3.38258	Forward Stutter	7.09607	97	0.820659	0.0519051			0.00129361	0.00453155
2.8.0	99-1_1.25ng_Set 1 Amp 1_rep-848408	2	2692188	7406.99	33.0803	1.09576	724	19			97.4828	2.51719			2.80682	Back Stutter	2.95427	Forward Stutter	4.28957	97	0.964596	0.0621767			0.00156559	0.00548292
2.8.0	99-1_1.25ng_Set 1 Amp 1_rep-858042	2	2844084	8458.48	33.1096	1.03167	696	19			97.399	2.60099			2.657	Back Stutter	3.04446	Forward Stutter	4.89815	97	0.726819	0.0620285			0.00116768	0.00552753
2.8.0	99-1_1.25ng_Set 1 Amp 1_rep-979142	2	2790837	11612.5	33.1773	1.03569	726	18			97.6199	2.38007			2.49249	Back Stutter	3.26562	Forward Stutter	6.425	97	0.914406	0.0540688			0.00144769	0.00473078
2.8.0	99-1_1.25ng_Set 1 Amp 1_rep-993333	2	2796881	7215.44	33.2982	1.07097	720	18			97.5668	2.4332			2.57116	Back Stutter	3.33334	Forward Stutter	6.23897	97	0.909567	0.0573074			0.00145398	0.00509559
2.8.0	99-1_1.25ng_Set 1 Amp 2_rep-28075	2	3245158	11601.4	29.7478	1.03414	976	17			98.2687	1.73127			4.52162	Back Stutter	4.66736	Forward Stutter	5.95194	97	1.26968	0.0521306			0.00151314	0.00466459
2.8.0	99-1_1.25ng_Set 1 Amp 2_rep-60279	2	3491301	9325.62	30.6668	1.13687	947	17			98.2245	1.77551			4.6251	Back Stutter	5.0203	Forward Stutter	4.76609	97	0.982745	0.0511423			0.00116346	0.00453676
2.8.0	99-1_1.25ng_Set 1 Amp 2_rep-67655	2	3564904	10465.1	30.7077	1.06327	1000	18			98.1925	1.80751			4.03146	Back Stutter	4.93214	Forward Stutter	5.65029	97	1.17537	0.0567957			0.00134071	0.00483738
2.8.0	99-1_1.25ng_Set 1 Amp 2_rep-213976	2	3876263	13877.3	31.5803	1.17804	1006	18			98.2662	1.73382			4.53532	Back Stutter	4.70184	Forward Stutter	5.81662	97	1.16986	0.0501425			0.00132392	0.00416398
2.8.0	99-1_1.25ng_Set 1 Amp 2_rep-216810	2	3680075	7418.17	30.0129	1.16264	994	18			98.2638	1.73624			4.87312	Back Stutter	4.5769	Forward Stutter	7.12472	97	1.08842	0.050871			0.00123785	0.00436856
2.8.0	99-1_1.25ng_Set 1 Amp 2_rep-723135	2	3476005	10934	31.2433	1.06252	987	18			98.1729	1.82706			4.42693	Back Stutter	4.8538	Forward Stutter	7.90892	97	1.12734	0.0569997			0.00129609	0.00487775
2.8.0	99-1_1.25ng_Set 1 Amp 2_rep-848408	2	3878487	9717.01	32.2129	1.02952	998	18			98.2366	1.76339			3.93942	Back Stutter	4.39984	Forward Stutter	4.68955	97	1.09884	0.0510561			0.00124595	0.0042226
2.8.0	99-1_1.25ng_Set 1 Amp 2_rep-858042	2	3339151	7445.35	30.2885	1.17023	968	19			98.121	1.87895			4.80221	Back Stutter	4.75089	Forward Stutter	5.02235	97	1.06823	0.0595883			0.00124467	0.00514134
2.8.0	99-1_1.25ng_Set 1 Amp 2_rep-979142	2	3122546	9413.06	31.2465	1.13584	935	18			98.1581	1.84194			4.30393	Back Stutter	4.60713	Forward Stutter	6.09947	97	1.09951	0.0548484			0.00134212	0.00494265
2.8.0	99-1_1.25ng_Set 1 Amp 2_rep-993333	2	3606417	8228.17	31.1226	1.07895	978	17			98.2691	1.73094			4.42192	Back Stutter	5.26618	Forward Stutter	5.46036	97	1.06563	0.0499987			0.00123352	0.00433545
2.8.0	99-1_2.5ng_Set 1 Amp 1_rep-28075	2	4652791	14601.7	40.4723	1.11143	1265	13			99.0129	0.987061			3.18052	Back Stutter	8.23564	Forward Stutter	7.58444	97	1.06397	0.0408557			0.000918421	0.00523217
2.8.0	99-1_2.5ng_Set 1 Amp 1_rep-60279	2	5118476	11739.5	40.9807	1.13724	1257	12			99.0832	0.916841			3.18153	Back Stutter	8.02727	Forward Stutter	5.36786	97	1.03335	0.0336946			0.000899673	0.00440587
2.8.0	99-1_2.5ng_Set 1 Amp 1_rep-67655	2	5255712	9708.73	41.1357	1.07075	1303	12			99.0557	0.944319			3.036	Back Stutter	7.86673	Forward Stutter	6.25088	97	1.14662	0.0375929			0.000970357	0.00465336
2.8.0	99-1_2.5ng_Set 1 Amp 1_rep-213976	2	4546417	12866.1	40.6095	1.16004	1260	13			98.9707	1.02929			3.24617	Back Stutter	7.61617	Forward Stutter	4.98194	97	1.18464	0.0440825			0.00105127	0.00562209
2.8.0	99-1_2.5ng_Set 1 Amp 1_rep-216810	2	4904529	13729.4	40.7825	1.04726	1310	13			99.0318	0.968221			3.20939	Back Stutter	7.92381	Forward Stutter	6.18952	97	1.24341	0.0410526			0.00105347	0.00508826
2.8.0	99-1_2.5ng_Set 1 Amp 1_rep-723135	2	4989053	10880.9	41.4772	1.11198	1296	13			99.0135	0.986454			3.15653	Back Stutter	8.11997	Forward Stutter	5.75966	97	1.04909	0.0416676			0.000882629	0.0051802
2.8.0	99-1_2.5ng_Set 1 Amp 1_rep-848408	2	4983651	14710.5	40.796	1.0627	1288	13			99.0381	0.961909			3.02928	Back Stutter	8.5709	Forward Stutter	5.84993	97	1.08762	0.0393492			0.000926075	0.00498233
2.8.0	99-1_2.5ng_Set 1 Amp 1_rep-858042	2	5064260	14269.9	41.1827	1.09232	1293	13			99.0103	0.989745			3.12359	Back Stutter	7.96027	Forward Stutter	6.0337	97	1.02492	0.0413332			0.000865722	0.00512379
2.8.0	99-1_2.5ng_Set 1 Amp 1_rep-979142	2	4893536	12978.9	40.8868	1.12421	1276	12			99.0499	0.950051			3.17316	Back Stutter	8.98926	Forward Stutter	6.58594	97	1.04898	0.0389504			0.000900768	0.00506855
2.8.0	99-1_2.5ng_Set 1 Amp 1_rep-993333	2	4796391	10302.9	40.9834	1.02474	1285	14			98.9505	1.04946			2.89324	Back Stutter	8.01748	Forward Stutter	3.97804	97	1.05676	0.0466864			0.000899395	0.00576375
2.8.0	99-1_2.5ng_Set 1 Amp 2_rep-28075	2	6221673	12341.7	51.695	1.06717	1954	37			98.1257	1.87435			3.73695	Back Stutter	7.38607	Forward Stutter	5.09618	90	1.79402	0.144378			0.00101084	0.00747101
2.8.0	99-1_2.5ng_Set 1 Amp 2_rep-60279	2	6234484	12534.4	52.4986	1.04346	1957	37			98.1419	1.85806			3.94189	Back Stutter	7.02313	Forward Stutter	4.31013	90	1.80534	0.14094			0.00101634	0.00721106
2.8.0	99-1_2.5ng_Set 1 Amp 2_rep-67655	2	6413422	14632.4	52.3374	1.04932	1982	37			98.1428	1.85715			4.16187	Back Stutter	7.08039	Forward Stutter	3.81779	90	1.71976	0.142453			0.000951772	0.0071703
2.8.0	99-1_2.5ng_Set 1 Amp 2_rep-213976	2	6016130	12123.4	52.3375	1.0258	2026	38			98.1661	1.83392			4.01272	Back Stutter	7.01636	Forward Stutter	3.98834	90	2.23383	0.145556			0.00125188	0.00733515
2.8.0	99-1_2.5ng_Set 1 Amp 2_rep-216810	2	6264729	15528.3	52.0709	1.09079	1946	37			98.1429	1.85707			3.91543	Back Stutter	7.63398	Forward Stutter	4.1044	90	1.80915	0.138837			0.00103246	0.00708918
2.8.0	99-1_2.5ng_Set 1 Amp 2_rep-723135	2	6244555	19122.1	52.6625	1.07159	1995	38			98.152	1.84797			3.83128	Back Stutter	7.29519	Forward Stutter	5.18628	90	2.02126	0.144612			0.00113282	0.00737928
2.8.0	99-1_2.5ng_Set 1 Amp 2_rep-848408	2	6391821	15626	52.42	1.03141	1998	39			98.1069	1.89313			3.62149	Back Stutter	7.1065	Forward Stutter	3.74042	90	1.99785	0.149562			0.00111672	0.00747296
2.8.0	99-1_2.5ng_Set 1 Amp 2_rep-858042	2	6452064	17779.3	52.7113	1.12247	1980	37			98.1668	1.83323			3.74395	Back Stutter	7.48254	Forward Stutter	4.22055	90	2.02937	0.137414			0.00114166	0.00681726
2.8.0	99-1_2.5ng_Set 1 Amp 2_rep-979142	2	6357898	17465.9	52.0209	1.05159	1990	38			98.1288	1.87123			3.73505	Back Stutter	7.23524	Forward Stutter	5.06676	90	1.89654	0.147358			0.00105768	0.00754569
2.8.0	99-1_2.5ng_Set 1 Amp 2_rep-993333	2	6432075	14989.4	52.4107	1.02549	2020	39			98.0971	1.90286			3.57203	Back Stutter	7.61362	Forward Stutter	4.37053	90	1.88583	0.153512			0.00103227	0.00766478
2.8.0	99-1_625pg_Set 1 Amp 1_rep-28075	2	2189029	3271	20.9533	1.03966	422	7			98.2695	1.73049			3.96258	Back Stutter	3.69782	Forward Stutter	6.96662	98	0.393254	0.0244178			0.00103162	0.00548453
2.8.0	99-1_625pg_Set 1 Amp 1_rep-60279	2	2011072	2766.36	20.2106	1.0143	423	8			98.254	1.74601			4.13765	Back Stutter	4.34182	Forward Stutter	6.06164	98	0.4211	0.0250084			0.00110964	0.00550539
2.8.0	99-1_625pg_Set 1 Amp 1_rep-67655	2	2245890	4324.66	20.7219	1.10732	415	8			98.2033	1.79669			3.7146	Back Stutter	4.07614	Forward Stutter	5.2678	98	0.342201	0.02523			0.000899128	0.00545346
2.8.0	99-1_625pg_Set 1 Amp 1_rep-213976	2	2092155	9307.89	20.3204	1.03734	432	8			98.271	1.72901			4.17324	Back Stutter	4.39864	Forward Stutter	5.57976	98	0.438599	0.024995			0.00113448	0.00536497
2.8.0	99-1_625pg_Set 1 Amp 1_rep-216810	2	2286041	2707.02	20.4634	1.06128	423	8			98.2286	1.77142			4.02741	Back Stutter	3.80022	Forward Stutter	7.05309	98	0.377143	0.0257759			0.000980572	0.00567183
2.8.0	99-1_625pg_Set 1 Amp 1_rep-723135	2	2219906	2901.69	20.6694	1.17613	425	7			98.3714	1.62863			3.87605	Back Stutter	3.81861	Forward Stutter	6.34443	98	0.393126	0.0213536			0.00102478	0.00473501
2.8.0	99-1_625pg_Set 1 Amp 1_rep-848408	2	2131894	3697.02	20.4786	1.02609	423	7			98.3902	1.60984			4.37843	Back Stutter	3.62008	Forward Stutter	6.06134	98	0.424972	0.0208311			0.00111771	0.00464038
2.8.0	99-1_625pg_Set 1 Amp 1_rep-858042	2	2073595	4578.72	20.7369	1.16058	436	8			98.2139	1.78613			4.0502	Back Stutter	3.97706	Forward Stutter	5.17434	98	0.47303	0.0271578			0.00123403	0.00579051
2.8.0	99-1_625pg_Set 1 Amp 1_rep-979142	2	1916301	7203.8	20.4297	1.11674	405	7			98.243	1.75698			4.10151	Back Stutter	3.70485	Forward Stutter	6.90872	98	0.391888	0.024431			0.00108735	0.00565142
2.8.0	99-1_625pg_Set 1 Amp 1_rep-993333	2	2125989	5949.74	20.2866	1.12061	419	7			98.2911	1.70893			3.92313	Back Stutter	3.96972	Forward Stutter	6.48481	98	0.39819	0.0234875			0.00105989	0.00523714
2.8.0	99-1_625pg_Set 1 Amp 2_rep-28075	2	2295898	5923.16	19.3269	1.21715	363	22			94.192	5.80803			3.73095	Back Stutter	4.7959	Forward Stutter	6.77362	97	0.474827	0.074315			0.00151364	0.00546958
2.8.0	99-1_625pg_Set 1 Amp 2_rep-60279	2	1973676	4005.74	18.9186	1.08363	360	21			94.454	5.546			3.50029	Back Stutter	4.37867	Forward Stutter	9.26791	97	0.39445	0.0629921			0.001239	0.00455033
2.8.0	99-1_625pg_Set 1 Amp 2_rep-67655	2	1771237	5147.51	19.0172	1.16663	339	20			94.4388	5.56115			3.30289	Back Stutter	4.56958	Forward Stutter	4.80557	97	0.350716	0.0584432			0.00117214	0.00450997
2.8.0	99-1_625pg_Set 1 Amp 2_rep-213976	2	2497963	6116.38	19.3905	1.22414	359	21			94.4451	5.55489			3.46055	Back Stutter	4.31916	Forward Stutter	5.77942	97	0.424534	0.0625156			0.00136641	0.00451963
2.8.0	99-1_625pg_Set 1 Amp 2_rep-216810	2	1953713	5425.46	19.4052	1.13418	362	21			94.6324	5.36762			3.90602	Back Stutter	3.78206	Forward Stutter	5.13706	97	0.434785	0.0600593			0.00137785	0.00439527
2.8.0	99-1_625pg_Set 1 Amp 2_rep-723135	2	1642522	4848.07	18.4927	1.10049	344	21			94.1874	5.81262			3.4006	Back Stutter	5.73589	Forward Stutter	5.64699	97	0.394687	0.0666484			0.00129863	0.00504209
2.8.0	99-1_625pg_Set 1 Amp 2_rep-848408	2	1690043	6945.9	19.3751	1.07737	354	21			94.4665	5.53346			3.42239	Back Stutter	5.12544	Forward Stutter	6.79797	97	0.441976	0.0610367			0.00144343	0.00449889
2.8.0	99-1_625pg_Set 1 Amp 2_rep-858042	2	1815093	3231.63	18.5053	1.03176	365	22			94.4111	5.58888			3.91967	Back Stutter	4.53265	Forward Stutter	6.21705	97	0.440455	0.0687542			0.00137676	0.0050644
2.8.0	99-1_625pg_Set 1 Amp 2_rep-979142	2	1756219	5262.08	18.7921	1.12412	357	19			94.877	5.123			3.34706	Back Stutter	4.8996	Forward Stutter	5.36415	97	0.439268	0.0576874			0.00141369	0.00481468
2.8.0	99-1_625pg_Set 1 Amp 2_rep-993333	2	1974197	4179.85	18.773	1.1407	365	23			94.049	5.95101			3.95192	Back Stutter	4.0058	Forward Stutter	5.74364	97	0.437098	0.0764891			0.00136843	0.00551601
2.8.0	1-1-1_1.2ng_Set 2_rep-35262	3	10106376	16675.5	61.7427	1.00946	592	526	451		37.7287	33.5117	28.7596		2.89177	Back Stutter	3.82139	Forward Stutter	4.77324	85	0.926315	0.662943	0.552783		0.00187477	0.00145142	0.00140366
2.8.0	1-1-1_1.2ng_Set 2_rep-104565	3	10549804	11171.3	62.131	1.0216	601	534	460		37.6809	33.4874	28.8317		3.05332	Back Stutter	4.25613	Forward Stutter	5.14891	85	1.04348	0.781014	0.611128		0.00213415	0.00173325	0.00154741
2.8.0	1-1-1_1.2ng_Set 2_rep-562810	3	10132306	17022.7	62.1329	1.09536	609	540	467		37.7045	33.4076	28.8879		3.05133	Back Stutter	4.07473	Forward Stutter	7.37367	85	1.069	0.780857	0.621384		0.00216019	0.00171757	0.00154838
2.8.0	1-1-1_1.2ng_Set 2_rep-626603	3	10490077	14163.9	60.8896	1.11753	599	532	460		37.6461	33.453	28.9009		3.13008	Back Stutter	3.87836	Forward Stutter	5.44226	85	1.03642	0.76508	0.601912		0.00212712	0.0016954	0.00152072
2.8.0	1-1-1_1.2ng_Set 2_rep-655450	3	8951367	15125.8	60.9297	1.04855	589	523	451		37.663	33.4679	28.8691		3.00016	Back Stutter	4.10199	Forward Stutter	5.27186	85	0.966205	0.708067	0.589738		0.00198586	0.00157974	0.00151252
2.8.0	1-1-1_1.2ng_Set 2_rep-803747	3	7869101	22523.7	60.5459	1.10413	617	545	472		37.7226	33.3754	28.902		3.09523	Back Stutter	3.94497	Forward Stutter	5.36179	85	1.08741	0.79653	0.621782		0.00217361	0.00172851	0.00152662
2.8.0	1-1-1_1.2ng_Set 2_rep-874844	3	9534153	12832.5	60.291	1.08034	601	533	464		37.6122	33.3596	29.0282		3.24403	Back Stutter	3.75309	Forward Stutter	5.34642	85	1.03463	0.755547	0.605038		0.00210744	0.00166738	0.00151788
2.8.0	1-1-1_1.2ng_Set 2_rep-887628	3	8632041	16366	60.1181	1.02693	606	537	463		37.7349	33.4295	28.8356		2.93989	Back Stutter	4.00249	Forward Stutter	6.33193	85	1.0567	0.73016	0.665523		0.00214656	0.00158824	0.00169675
2.8.0	1-1-1_1.2ng_Set 2_rep-952324	3	7238569	9510.15	61.7656	1.06692	610	540	465		37.7536	33.4355	28.8109		3.07696	Back Stutter	4.24727	Forward Stutter	5.13711	85	1.04642	0.766946	0.629868		0.00210346	0.00167301	0.00157972
2.8.0	1-1-1_1.2ng_Set 2_rep-960932	3	9041814	15223.9	61.164	1.06989	597	529	454		37.7906	33.4856	28.7238		3.13246	Back Stutter	4.08339	Forward Stutter	6.16899	85	0.994489	0.697422	0.547513		0.00202487	0.0015327	0.00137987
2.8.0	1-1-1_38pg_Set 2_rep-35262	3	2071492	2759.95	-2.163	1.12734	29	20	12		47.4712	32.8739	19.6549		3.12184	Back Stutter	10.3303	Forward Stutter	8.35168	102	0.0721823	0.046185	0.0271395		0.00361278	0.00329848	0.0031928
2.8.0	1-1-1_38pg_Set 2_rep-104565	3	1903720	3591.49	-1.79805	1.13079	28	19	11		47.6136	32.9158	19.4707		2.89446	Back Stutter	7.71289	Forward Stutter	7.25719	102	0.0690165	0.047403	0.026356		0.00343791	0.00354437	0.00319734
2.8.0	1-1-1_38pg_Set 2_rep-562810	3	2551961	1601.82	-1.71676	1.26014	29	20	12		47.0409	32.9692	19.9899		2.84628	Back Stutter	9.55792	Forward Stutter	7.65745	102	0.0717671	0.0469767	0.0288977		0.00349474	0.00327023	0.00345316
2.8.0	1-1-1_38pg_Set 2_rep-626603	3	1800253	1612.68	-1.83393	1.07854	28	19	11		47.9451	32.7784	19.2765		3.3894	Back Stutter	8.52018	Forward Stutter	5.38533	102	0.0756013	0.0472493	0.0260557		0.00382601	0.00340291	0.00314941
2.8.0	1-1-1_38pg_Set 2_rep-655450	3	1930398	1244.52	-1.4841	1.06557	29	20	12		48.0612	32.6127	19.3261		3.33179	Back Stutter	7.13998	Forward Stutter	5.57026	102	0.077361	0.0470967	0.0286859		0.00391697	0.00338393	0.00372467
2.8.0	1-1-1_38pg_Set 2_rep-803747	3	2074115	1293.4	-1.58076	1.17416	29	20	12		47.8056	32.6075	19.587		3.42759	Back Stutter	6.89038	Forward Stutter	6.07774	102	0.0786807	0.0473237	0.0319152		0.00386975	0.00325169	0.00387351
2.8.0	1-1-1_38pg_Set 2_rep-874844	3	2041832	1626.73	-1.8549	1.06913	28	19	12		47.4347	32.7552	19.8101		3.14081	Back Stutter	10.704	Forward Stutter	4.75274	102	0.0712449	0.0430194	0.0238242		0.00367988	0.00310962	0.00288976
2.8.0	1-1-1_38pg_Set 2_rep-887628	3	2065216	1626.35	-1.66324	1.1296	29	20	11		47.9362	32.9123	19.1515		3.41904	Back Stutter	9.26184	Forward Stutter	5.40367	102	0.0720346	0.0403159	0.0335277		0.00368294	0.00274939	0.00457729
2.8.0	1-1-1_38pg_Set 2_rep-952324	3	2078452	871.489	-1.92636	1.08347	29	20	12		47.3122	32.8409	19.8469		2.98273	Back Stutter	11.5813	Forward Stutter	7.91292	102	0.0798892	0.0459673	0.0296876		0.00410905	0.00306343	0.00350081
2.8.0	1-1-1_38pg_Set 2_rep-960932	3	1982637	1532.15	-1.61918	1.08355	30	21	13		47.1542	32.9091	19.9367		2.99946	Back Stutter	7.83265	Forward Stutter	4.53804	102	0.0876058	0.0487167	0.0275315		0.00459881	0.00333868	0.00312115
2.8.0	1-1-1_75pg_Set 2_rep-35262	3	2877817	13780.8	3.21934	1.09956	43	32	23		44.0572	32.6788	23.2641		2.66493	Back Stutter	7.51512	Forward Stutter	6.02716	94	0.093825	0.0690536	0.0391954		0.00294929	0.00287965	0.0022204
2.8.0	1-1-1_75pg_Set 2_rep-104565	3	3051388	13773.9	2.92148	1.14744	44	33	23		44.0384	32.6841	23.2775		2.68505	Back Stutter	9.5604	Forward Stutter	5.82313	94	0.110111	0.06949	0.0391236		0.00361257	0.00287021	0.0020816
2.8.0	1-1-1_75pg_Set 2_rep-562810	3	2966788	8023.09	2.78256	1.11623	44	32	23		44.3976	32.7924	22.8099		2.82863	Back Stutter	11.2414	Forward Stutter	6.0493	94	0.0999221	0.0580443	0.0548859		0.00309849	0.00236804	0.00365783
2.8.0	1-1-1_75pg_Set 2_rep-626603	3	3079687	8229.48	3.07749	1.08341	43	32	23		43.8049	32.8865	23.3086		2.50192	Back Stutter	8.9753	Forward Stutter	6.49078	94	0.0891431	0.069241	0.0433912		0.00291994	0.00292261	0.0025693
2.8.0	1-1-1_75pg_Set 2_rep-655450	3	2861748	9573.71	2.5157	1.16194	44	32	23		44.3279	32.7337	22.9384		2.86093	Back Stutter	8.13742	Forward Stutter	6.02817	94	0.108715	0.0633003	0.0459948		0.00349055	0.00256023	0.00275259
2.8.0	1-1-1_75pg_Set 2_rep-803747	3	2911118	13183.6	3.33689	1.0901	43	32	23		44.1813	32.7741	23.0446		2.78292	Back Stutter	8.1538	Forward Stutter	7.19711	94	0.0970112	0.0704821	0.0464174		0.003021	0.00305537	0.00274702
2.8.0	1-1-1_75pg_Set 2_rep-874844	3	3554592	7984.06	3.15884	1.39567	44	32	22		44.5388	32.5711	22.8901		2.64814	Back Stutter	10.4005	Forward Stutter	8.19735	94	0.102597	0.0667308	0.048006		0.0033635	0.0028195	0.00286636
2.8.0	1-1-1_75pg_Set 2_rep-887628	3	2926886	7585.86	3.63162	1.03888	42	31	22		44.0632	32.6806	23.2562		2.69178	Back Stutter	11.171	Forward Stutter	5.90772	94	0.0973145	0.0658966	0.0425002		0.00310254	0.0027465	0.00247236
2.8.0	1-1-1_75pg_Set 2_rep-952324	3	2961296	6845.67	2.88245	1.07722	41	31	21		44.3749	32.688	22.9371		2.59099	Back Stutter	9.8094	Forward Stutter	8.63371	94	0.0884292	0.0554297	0.0455451		0.00289777	0.00228259	0.00285345
2.8.0	1-1-1_75pg_Set 2_rep-960932	3	3450904	7350.82	3.19729	1.23285	42	31	22		44.6025	32.5448	22.8527		3.05974	Back Stutter	9.58015	Forward Stutter	7.14861	94	0.100995	0.0552356	0.040632		0.00330579	0.00221686	0.00250608
2.8.0	1-1-1_150pg_Set 2_rep-35262	3	4883414	19304	13.2383	1.03019	69	54	41		42.0454	32.7448	25.2099		2.32934	Back Stutter	8.01406	Forward Stutter	5.84426	85	0.169817	0.102052	0.0539259		0.00340639	0.00245236	0.00150903
2.8.0	1-1-1_150pg_Set 2_rep-104565	3	4843414	9368.98	15.4762	1.05885	73	55	42		42.6211	32.5389	24.8399		2.57577	Back Stutter	8.50755	Forward Stutter	5.93024	85	0.181547	0.104976	0.0533247		0.00349553	0.00242085	0.00146213
2.8.0	1-1-1_150pg_Set 2_rep-562810	3	5154630	17309.2	12.6939	1.07994	73	55	43		42.6284	32.2753	25.0963		2.33331	Back Stutter	9.16403	Forward Stutter	7.09007	85	0.186307	0.0995267	0.0571079		0.00367281	0.00227398	0.00155614
2.8.0	1-1-1_150pg_Set 2_rep-626603	3	4566374	19015.7	14.6625	1.03943	75	56	43		43.157	32.1461	24.6969		2.53341	Back Stutter	9.48253	Forward Stutter	6.14981	85	0.213909	0.0994519	0.0581917		0.00423221	0.00223879	0.00159971
2.8.0	1-1-1_150pg_Set 2_rep-655450	3	4494550	10772.2	14.1329	1.1425	72	55	42		42.8577	32.5267	24.6156		2.48311	Back Stutter	11.6833	Forward Stutter	6.6834	85	0.198644	0.109812	0.0574414		0.00398474	0.00261325	0.00161348
2.8.0	1-1-1_150pg_Set 2_rep-803747	3	4886369	8210.91	15.7292	1.05839	68	52	41		42.2666	32.4582	25.2752		2.39396	Back Stutter	6.26647	Forward Stutter	6.23212	85	0.159648	0.093325	0.0560381		0.00324932	0.00221267	0.00162047
2.8.0	1-1-1_150pg_Set 2_rep-874844	3	4715880	14069	13.6914	1.17055	71	54	41		42.5476	32.5242	24.9282		2.6507	Back Stutter	9.85042	Forward Stutter	7.35327	85	0.181794	0.102296	0.0529716		0.00362761	0.00240484	0.00148173
2.8.0	1-1-1_150pg_Set 2_rep-887628	3	4394722	5974.62	14.0589	1.06691	71	54	41		42.6926	32.3812	24.9262		2.52327	Back Stutter	10.0114	Forward Stutter	6.9523	85	0.180586	0.100937	0.0678444		0.00360131	0.00236413	0.0020162
2.8.0	1-1-1_150pg_Set 2_rep-952324	3	4735020	11624.6	15.0836	1.09102	72	55	42		42.4932	32.3958	25.111		2.51113	Back Stutter	8.23978	Forward Stutter	5.70425	85	0.182154	0.103194	0.0624994		0.00354268	0.0024057	0.00175027
2.8.0	1-1-1_150pg_Set 2_rep-960932	3	4889392	9957.26	13.6348	1.02767	71	55	42		42.3681	32.7626	24.8693		2.44847	Back Stutter	10.9134	Forward Stutter	6.29786	85	0.165155	0.110649	0.0587306		0.0031399	0.0025939	0.00165933
2.8.0	1-1-1_300pg_Set 2_rep-35262	3	14740764	9168.12	27.0004	1.04099	136	108	83		41.6969	32.9889	25.3142		2.58424	Back Stutter	10.244	Forward Stutter	7.97411	85	0.330215	0.195274	0.0938942		0.00332324	0.00226311	0.0012882
2.8.0	1-1-1_300pg_Set 2_rep-104565	3	13088664	20234.6	29.021	1.15711	137	108	82		41.8642	33.0994	25.0364		2.78729	Back Stutter	7.28011	Forward Stutter	6.33005	85	0.344664	0.205261	0.105275		0.00354801	0.00240564	0.00148161
2.8.0	1-1-1_300pg_Set 2_rep-562810	3	16055455	24434.3	28.1251	1.05498	130	101	78		41.9662	32.6081	25.4257		2.60171	Back Stutter	8.59123	Forward Stutter	6.64269	85	0.281108	0.133341	0.0869948		0.00284519	0.00154907	0.00125951
2.8.0	1-1-1_300pg_Set 2_rep-626603	3	16961881	16429.5	27.6507	1.01671	127	101	80		41.2813	32.8433	25.8754		2.5368	Back Stutter	8.19679	Forward Stutter	6.2377	85	0.255538	0.129823	0.0892445		0.00259323	0.00148943	0.00126807
2.8.0	1-1-1_300pg_Set 2_rep-655450	3	16349263	19047.3	29.9836	1.05699	132	104	81		41.5702	32.9912	25.4386		2.54371	Back Stutter	8.6899	Forward Stutter	6.78826	85	0.289231	0.163432	0.090956		0.0029017	0.00189041	0.00128204
2.8.0	1-1-1_300pg_Set 2_rep-803747	3	15499575	10924.5	28.2187	1.01639	134	104	80		42.057	32.6586	25.2844		2.63214	Back Stutter	8.00295	Forward Stutter	5.3009	85	0.313047	0.155244	0.094246		0.0031689	0.00178445	0.00133784
2.8.0	1-1-1_300pg_Set 2_rep-874844	3	18663968	22824.8	27.9872	1.0426	131	103	81		41.4642	32.7698	25.7661		2.37496	Back Stutter	8.57847	Forward Stutter	5.75373	85	0.2834	0.154493	0.0943619		0.00284303	0.00177424	0.00132488
2.8.0	1-1-1_300pg_Set 2_rep-887628	3	17408857	7921.13	28.6384	1.05823	133	105	81		41.6932	32.8654	25.4414		2.55274	Back Stutter	9.70406	Forward Stutter	5.0092	85	0.283575	0.153728	0.0939141		0.00277438	0.00173983	0.0013163
2.8.0	1-1-1_300pg_Set 2_rep-952324	3	16220219	16777.9	28.8411	1.11074	124	99	78		41.0941	32.9765	25.9294		2.52435	Back Stutter	7.88894	Forward Stutter	6.73159	85	0.2453	0.139049	0.0883267		0.00251219	0.00163754	0.00128323
2.8.0	1-1-1_300pg_Set 2_rep-960932	3	15941286	37297.6	28.277	1.09714	131	103	80		41.7635	32.7633	25.4732		2.50304	Back Stutter	7.99331	Forward Stutter	5.12725	85	0.299981	0.165396	0.0884364		0.00308349	0.00195621	0.00125578
2.8.0	1-1-1_600pg_Set 2_rep-35262	3	18159249	11379.3	39.7024	1.42663	238	203	163		39.4881	33.5825	26.9294		3.3015	Back Stutter	6.70854	Forward Stutter	5.67509	85	0.55199	0.427592	0.308315		0.00318434	0.00293748	0.00246153
2.8.0	1-1-1_600pg_Set 2_rep-104565	3	13259237	13426.5	38.9187	1.12755	247	210	171		39.3876	33.4252	27.1872		3.2154	Back Stutter	6.34271	Forward Stutter	6.31088	85	0.617581	0.463291	0.316109		0.00358577	0.00311869	0.00249209
2.8.0	1-1-1_600pg_Set 2_rep-562810	3	15272309	9293.29	39.2062	1.13886	244	207	166		39.621	33.5285	26.8505		3.05907	Back Stutter	8.88874	Forward Stutter	6.08382	85	0.534802	0.478609	0.307164		0.00300972	0.00339185	0.00245993
2.8.0	1-1-1_600pg_Set 2_rep-626603	3	22552186	13371.3	40.7247	1.40028	248	208	167		39.8492	33.3776	26.7732		3.04097	Back Stutter	6.07979	Forward Stutter	4.74284	85	0.644047	0.325646	0.355811		0.00369317	0.00207425	0.00301932
2.8.0	1-1-1_600pg_Set 2_rep-655450	3	17695250	17537.6	40.1694	1.1781	249	213	175		39.0859	33.4201	27.494		2.75549	Back Stutter	10.0505	Forward Stutter	4.78298	85	0.6816	0.220606	0.498445		0.00415617	0.0011859	0.00434128
2.8.0	1-1-1_600pg_Set 2_rep-803747	3	18104235	30296.1	39.7046	1.27229	227	193	153		39.7165	33.6959	26.5876		3.41508	Back Stutter	7.07349	Forward Stutter	6.57932	85	0.484506	0.279889	0.302872		0.00288627	0.00176732	0.00255013
2.8.0	1-1-1_600pg_Set 2_rep-874844	3	18032714	11013.8	40.1097	1.21528	246	204	161		40.1673	33.4456	26.3871		3.33097	Back Stutter	6.84531	Forward Stutter	5.66821	85	0.602366	0.315735	0.405091		0.00344721	0.00189403	0.00352759
2.8.0	1-1-1_600pg_Set 2_rep-887628	3	21668608	10157.7	40.2305	1.319	236	203	164		39.1659	33.7006	27.1335		2.78893	Back Stutter	6.18338	Forward Stutter	6.49756	85	0.530459	0.284397	0.439451		0.00300952	0.00169402	0.00396504
2.8.0	1-1-1_600pg_Set 2_rep-952324	3	15068499	13645	38.1007	1.06346	233	198	155		39.7846	33.717	26.4984		3.15184	Back Stutter	6.52012	Forward Stutter	7.20278	85	0.483071	0.313514	0.282575		0.00267457	0.0019318	0.00226944
2.8.0	1-1-1_600pg_Set 2_rep-960932	3	18193459	17309.7	39.9481	1.23777	230	197	155		39.5941	33.7817	26.6243		2.93395	Back Stutter	8.06172	Forward Stutter	6.85369	85	0.540961	0.325874	0.308827		0.00324672	0.00219036	0.00256008
2.8.0	3-2-1_1.2ng_Set 1 Amp 1_rep-28075	3	14342678	10013.4	50.23	1.14573	499	363	251		44.8466	32.5818	22.5717		4.56915	Back Stutter	2.5919	Forward Stutter	5.11999	85	0.743659	0.600782	0.367983		0.00185675	0.00211888	0.00174961
2.8.0	3-2-1_1.2ng_Set 1 Amp 1_rep-60279	3	11553627	19712.1	46.3465	1.09592	496	363	258		44.4062	32.4997	23.0941		4.99168	Back Stutter	2.74626	Forward Stutter	5.7057	85	0.685304	0.746202	0.406985		0.00162398	0.00272018	0.00191617
2.8.0	3-2-1_1.2ng_Set 1 Amp 1_rep-67655	3	13798425	17964.5	48.481	1.19164	487	349	247		45.0024	32.2028	22.7948		4.94467	Back Stutter	2.59999	Forward Stutter	5.68465	85	0.678948	0.547751	0.400647		0.00164246	0.00191838	0.00198361
2.8.0	3-2-1_1.2ng_Set 1 Amp 1_rep-213976	3	15645442	10916.8	50.6536	1.23012	499	355	243		45.5086	32.3463	22.1451		4.42377	Back Stutter	2.58833	Forward Stutter	6.51623	85	0.819929	0.493947	0.382993		0.00204912	0.00171502	0.00191425
2.8.0	3-2-1_1.2ng_Set 1 Amp 1_rep-216810	3	16380465	14361.8	49.8706	1.27298	495	356	251		44.9256	32.2817	22.7927		4.7781	Back Stutter	2.62966	Forward Stutter	7.4394	85	0.853337	0.520654	0.353757		0.00222988	0.00179329	0.00167841
2.8.0	3-2-1_1.2ng_Set 1 Amp 1_rep-723135	3	12148916	22007.9	50.004	1.13472	486	354	243		44.8484	32.7263	22.4253		4.82158	Back Stutter	2.71037	Forward Stutter	6.69269	85	0.639066	0.548212	0.4046		0.00152543	0.00190323	0.0020343
2.8.0	3-2-1_1.2ng_Set 1 Amp 1_rep-848408	3	15254079	17531.2	53.5446	1.44957	511	376	254		44.7929	32.9546	22.2525		5.06187	Back Stutter	2.59516	Forward Stutter	6.01795	85	1.07396	0.465738	0.364438		0.00285845	0.00146717	0.00174325
2.8.0	3-2-1_1.2ng_Set 1 Amp 1_rep-858042	3	11913712	19875.4	49.7347	1.44789	496	361	250		44.8558	32.6021	22.5422		5.76967	Back Stutter	2.71602	Forward Stutter	5.68131	85	0.974595	0.517945	0.407843		0.0025412	0.00172612	0.00199215
2.8.0	3-2-1_1.2ng_Set 1 Amp 1_rep-979142	3	13094805	15201.3	51.0161	1.1754	501	356	246		45.4041	32.2733	22.3226		4.80214	Back Stutter	2.74745	Forward Stutter	5.66121	85	0.770722	0.561215	0.356785		0.00188434	0.0019575	0.00171609
2.8.0	3-2-1_1.2ng_Set 1 Amp 1_rep-993333	3	12359532	12119.2	51.7909	1.17139	508	367	251		45.0657	32.6046	22.3297		4.35304	Back Stutter	2.66623	Forward Stutter	4.61085	85	0.90443	0.513151	0.449134		0.00226813	0.00171376	0.0022188
2.8.0	3-2-1_1.2ng_Set 1 Amp 2_rep-28075	3	11865831	19321.2	52.9319	1.14557	612	500	369		41.3297	33.7049	24.9654		3.71673	Back Stutter	3.65314	Forward Stutter	5.94507	85	1.54039	1.0711	0.466658		0.00397973	0.00321988	0.00165339
2.8.0	3-2-1_1.2ng_Set 1 Amp 2_rep-60279	3	9414364	13115.9	53.7448	1.12943	596	491	366		41.0053	33.7936	25.2012		4.21413	Back Stutter	3.8952	Forward Stutter	6.70912	85	1.76154	0.943531	0.25804		0.00499175	0.00291653	0.000759329
2.8.0	3-2-1_1.2ng_Set 1 Amp 2_rep-67655	3	10436580	17295.9	51.7033	1.12013	562	464	364		40.4538	33.3562	26.1901		4.73983	Back Stutter	3.71091	Forward Stutter	5.54496	85	1.15905	0.976942	0.525907		0.00298915	0.00316529	0.00186897
2.8.0	3-2-1_1.2ng_Set 1 Amp 2_rep-213976	3	9417891	7953.61	47.496	1.07302	578	460	369		41.0397	32.6859	26.2744		4.56948	Back Stutter	3.87373	Forward Stutter	6.70439	85	1.20981	0.775898	0.675726		0.00304137	0.00230638	0.00259702
2.8.0	3-2-1_1.2ng_Set 1 Amp 2_rep-216810	3	11338546	14964.4	53.0921	1.18514	579	467	366		40.9892	33.0424	25.9684		3.928	Back Stutter	3.61401	Forward Stutter	6.92186	85	0.929645	1.24178	0.608482		0.00193229	0.00408618	0.00229573
2.8.0	3-2-1_1.2ng_Set 1 Amp 2_rep-723135	3	10176763	15428	51.1343	1.39846	576	465	367		40.8659	32.9984	26.1358		4.74979	Back Stutter	3.80521	Forward Stutter	6.63346	85	1.07614	1.04787	0.60555		0.00253227	0.00331512	0.00223927
2.8.0	3-2-1_1.2ng_Set 1 Amp 2_rep-848408	3	8788325	17354.9	52.8487	1.11057	581	487	361		40.6416	34.0828	25.2756		4.02521	Back Stutter	3.66524	Forward Stutter	6.07432	85	1.22616	1.37914	0.263438		0.00307813	0.00464265	0.000787965
2.8.0	3-2-1_1.2ng_Set 1 Amp 2_rep-858042	3	10426609	15411.6	53.364	1.21396	576	467	352		41.2627	33.465	25.2723		4.27413	Back Stutter	3.81672	Forward Stutter	5.47601	85	1.50978	0.970848	0.322039		0.00424806	0.0031107	0.00110085
2.8.0	3-2-1_1.2ng_Set 1 Amp 2_rep-979142	3	9925506	22915.5	52.0472	1.2718	602	491	366		41.2587	33.6434	25.0979		4.17821	Back Stutter	3.90651	Forward Stutter	7.02716	85	1.80051	0.94535	0.268396		0.00512002	0.00289226	0.000795323
2.8.0	3-2-1_1.2ng_Set 1 Amp 2_rep-993333	3	10442146	14712.7	53.252	1.16874	562	455	365		40.6617	32.8924	26.4459		4.08416	Back Stutter	3.82775	Forward Stutter	6.68918	85	1.01399	0.911331	0.725183		0.00244893	0.0028495	0.0028036
2.8.0	3-2-1_38pg_Set 1 Amp 1_rep-28075	3	1397645	555.588	-5.6647	1.0803	29	16	8		53.715	30.8752	15.4098		4.13556	Back Stutter	8.607	Forward Stutter	6.6476	130	0.0869394	0.0503677	0.026695		0.00489	0.00488328	0.00553043
2.8.0	3-2-1_38pg_Set 1 Amp 1_rep-60279	3	1721760	532.593	-5.56878	1.28402	28	16	8		53.2889	31.3209	15.3902		3.76596	Back Stutter	9.6767	Forward Stutter	5.45314	130	0.0809027	0.0462191	0.0227954		0.00450315	0.00431291	0.00446575
2.8.0	3-2-1_38pg_Set 1 Amp 1_rep-67655	3	1447905	727.434	-5.54332	1.19814	29	17	8		53.2665	31.1862	15.5473		3.80427	Back Stutter	9.09965	Forward Stutter	6.32061	130	0.080397	0.0521046	0.0201581		0.0044017	0.00502251	0.00343993
2.8.0	3-2-1_38pg_Set 1 Amp 1_rep-213976	3	1452185	472.988	-5.38657	1.15023	28	16	8		53.0221	31.3471	15.6308		3.33611	Back Stutter	8.85582	Forward Stutter	4.32702	130	0.0948267	0.0485192	0.0230368		0.00586372	0.00463301	0.00427371
2.8.0	3-2-1_38pg_Set 1 Amp 1_rep-216810	3	1685702	421.029	-5.73615	1.33477	27	16	8		53.2202	31.1935	15.5862		4.12778	Back Stutter	8.90405	Forward Stutter	7.22088	130	0.0794192	0.0506746	0.0241525		0.00454584	0.00523569	0.00477713
2.8.0	3-2-1_38pg_Set 1 Amp 1_rep-723135	3	1409999	283.966	-5.62409	1.11165	27	16	8		53.4021	31.0936	15.5043		4.38824	Back Stutter	11.7975	Forward Stutter	6.36513	130	0.0766737	0.049162	0.0228009		0.00438026	0.00498473	0.00447983
2.8.0	3-2-1_38pg_Set 1 Amp 1_rep-848408	3	1418350	401.48	-5.46294	1.04595	29	17	8		53.4751	31.2105	15.3145		3.79888	Back Stutter	8.89496	Forward Stutter	6.82146	130	0.0869916	0.0488983	0.0236081		0.00476362	0.00447426	0.0044705
2.8.0	3-2-1_38pg_Set 1 Amp 1_rep-858042	3	1467660	751.441	-5.50883	1.12515	30	18	9		52.4955	31.6277	15.8768		2.98667	Back Stutter	11.5191	Forward Stutter	5.38286	130	0.0956955	0.0593738	0.0259495		0.00515796	0.00542196	0.00443504
2.8.0	3-2-1_38pg_Set 1 Amp 1_rep-979142	3	1470647	345.334	-5.27038	1.13334	28	17	8		52.9855	31.3079	15.7066		3.31538	Back Stutter	8.06709	Forward Stutter	6.16743	130	0.0867279	0.0518268	0.0225318		0.00487922	0.00503667	0.00418707
2.8.0	3-2-1_38pg_Set 1 Amp 1_rep-993333	3	1379347	455.744	-5.53624	1.11336	29	17	8		53.1161	31.3022	15.5818		4.21033	Back Stutter	10.371	Forward Stutter	5.22203	130	0.0908404	0.0514945	0.0264091		0.00515544	0.00489364	0.0051638
2.8.0	3-2-1_38pg_Set 1 Amp 2_rep-28075	3	2338795	3797.26	0.912164	1.06936	40	28	19		45.4323	32.5767	21.9911		2.70809	Back Stutter	9.88572	Forward Stutter	5.37749	97	0.104582	0.0575817	0.0318524		0.00389769	0.00274281	0.00208115
2.8.0	3-2-1_38pg_Set 1 Amp 2_rep-60279	3	2671181	2241.62	0.473798	1.25011	39	27	18		45.9494	32.6089	21.4417		3.06427	Back Stutter	8.59399	Forward Stutter	9.31778	97	0.0935447	0.0524021	0.040661		0.00335534	0.00255521	0.00321279
2.8.0	3-2-1_38pg_Set 1 Amp 2_rep-67655	3	2353096	4194.11	1.09516	1.07902	38	28	19		45.3088	32.7458	21.9455		2.76705	Back Stutter	10.203	Forward Stutter	4.92291	97	0.0849828	0.0600554	0.0349023		0.00307313	0.0030499	0.00269442
2.8.0	3-2-1_38pg_Set 1 Amp 2_rep-213976	3	2591040	3932.2	0.965082	1.19141	39	28	18		45.7608	32.7003	21.5389		2.97687	Back Stutter	10.6505	Forward Stutter	6.05159	97	0.0910675	0.0620526	0.0330737		0.00331069	0.00309875	0.0024158
2.8.0	3-2-1_38pg_Set 1 Amp 2_rep-216810	3	2106655	4833.06	1.28069	1.18705	41	29	18		46.5257	32.5686	20.9057		2.9221	Back Stutter	8.10113	Forward Stutter	5.82698	97	0.105793	0.0592247	0.0437523		0.00367681	0.00272991	0.00358668
2.8.0	3-2-1_38pg_Set 1 Amp 2_rep-723135	3	2116615	3542.22	0.979682	1.14432	39	27	18		46.1262	32.6914	21.1823		2.6629	Back Stutter	8.46347	Forward Stutter	5.91246	97	0.0954794	0.0582848	0.0364029		0.00353489	0.00283836	0.00272277
2.8.0	3-2-1_38pg_Set 1 Amp 2_rep-848408	3	1986911	7162.3	0.22176	1.15114	38	27	17		46.4359	32.6912	20.873		2.92638	Back Stutter	9.25581	Forward Stutter	7.32724	97	0.0933642	0.0571958	0.0403864		0.00340359	0.00283165	0.00364142
2.8.0	3-2-1_38pg_Set 1 Amp 2_rep-858042	3	2303851	4760.68	1.1376	1.17876	39	27	18		46.6816	32.3019	21.0164		2.88166	Back Stutter	9.97666	Forward Stutter	5.20928	97	0.111849	0.0575144	0.0384612		0.00438921	0.0028515	0.003037
2.8.0	3-2-1_38pg_Set 1 Amp 2_rep-979142	3	2604016	4506.3	0.598629	1.12018	39	28	18		46.3328	32.5715	21.0957		3.03927	Back Stutter	10.1015	Forward Stutter	5.04317	97	0.101557	0.0504247	0.0415022		0.00377249	0.00233112	0.00352513
2.8.0	3-2-1_38pg_Set 1 Amp 2_rep-993333	3	2050940	4361.49	1.32623	1.05426	41	29	19		46.1993	32.4682	21.3325		3.09001	Back Stutter	8.77832	Forward Stutter	6.01461	97	0.116841	0.0672446	0.037982		0.00425534	0.00323988	0.00272608
2.8.0	3-2-1_75pg_Set 1 Amp 1_rep-28075	3	3843626	6923.81	9.11534	1.02825	41	32	24		42.2947	33.1119	24.5935		2.31778	Back Stutter	9.02565	Forward Stutter	5.60067	97	0.0856419	0.0566201	0.0337161		0.00275251	0.00221506	0.00165777
2.8.0	3-2-1_75pg_Set 1 Amp 1_rep-60279	3	3601215	17261.8	6.75055	1.0688	41	31	23		43.111	33.0965	23.7925		2.34045	Back Stutter	9.85686	Forward Stutter	5.65032	97	0.0881051	0.047542	0.0383602		0.00288789	0.00186542	0.00215304
2.8.0	3-2-1_75pg_Set 1 Amp 1_rep-67655	3	3674002	9561.38	6.87023	1.12552	40	31	23		42.2098	33.1363	24.6539		2.35691	Back Stutter	9.56442	Forward Stutter	6.96565	97	0.0869629	0.0539284	0.0395332		0.00289076	0.00220911	0.00220143
2.8.0	3-2-1_75pg_Set 1 Amp 1_rep-213976	3	3733679	8305.04	6.85277	1.02717	40	31	23		42.2878	33.1818	24.5304		2.33911	Back Stutter	9.25465	Forward Stutter	6.00886	97	0.0763668	0.0576547	0.0350845		0.00248186	0.00233715	0.00185755
2.8.0	3-2-1_75pg_Set 1 Amp 1_rep-216810	3	3669493	11541.9	6.97482	1.08777	42	33	24		42.698	33.059	24.243		2.3017	Back Stutter	9.19778	Forward Stutter	7.25238	97	0.0998769	0.061185	0.0353233		0.0033221	0.00242861	0.00180146
2.8.0	3-2-1_75pg_Set 1 Amp 1_rep-723135	3	3855267	5923.36	8.55333	1.03605	41	33	24		42.309	33.1898	24.5012		2.36701	Back Stutter	7.95077	Forward Stutter	6.35537	97	0.0901551	0.0565245	0.0384623		0.00288183	0.00215898	0.00202465
2.8.0	3-2-1_75pg_Set 1 Amp 1_rep-848408	3	3634257	4941.41	8.19695	1.08934	41	32	24		42.2867	33.2329	24.4804		2.57337	Back Stutter	10.4144	Forward Stutter	7.15883	97	0.086279	0.0641481	0.0450328		0.00279927	0.0026642	0.00269992
2.8.0	3-2-1_75pg_Set 1 Amp 1_rep-858042	3	3775629	12095	7.20494	1.0859	40	31	23		42.4013	33.2358	24.3629		2.27104	Back Stutter	7.78625	Forward Stutter	6.65916	97	0.0842289	0.0473745	0.0389399		0.00277089	0.00182595	0.0022264
2.8.0	3-2-1_75pg_Set 1 Amp 1_rep-979142	3	4242945	11472.2	7.05538	1.18536	40	31	23		42.3361	33.1499	24.514		2.62667	Back Stutter	8.9526	Forward Stutter	6.38048	97	0.0836225	0.0550155	0.0387807		0.00277349	0.00223282	0.00218288
2.8.0	3-2-1_75pg_Set 1 Amp 1_rep-993333	3	3623531	5750.14	7.32128	1.1858	39	30	22		42.7451	32.8948	24.3601		2.27867	Back Stutter	9.51808	Forward Stutter	4.28838	97	0.0883007	0.0435435	0.0341853		0.00318029	0.0017498	0.00187519
2.8.0	3-2-1_75pg_Set 1 Amp 2_rep-28075	3	2929695	6402.45	3.24856	1.05107	43	31	21		45.6822	32.482	21.8358		2.82378	Back Stutter	12.4911	Forward Stutter	6.32472	85	0.0875719	0.0534945	0.0394307		0.00272283	0.00221516	0.00250377
2.8.0	3-2-1_75pg_Set 1 Amp 2_rep-60279	3	2859342	20650.5	3.99148	1.16909	43	30	20		45.7861	32.5949	21.619		2.80573	Back Stutter	6.90462	Forward Stutter	5.45384	85	0.0848425	0.0565527	0.0412168		0.00267467	0.00241618	0.00277017
2.8.0	3-2-1_75pg_Set 1 Amp 2_rep-67655	3	2970434	8542.05	4.73054	1.06857	44	32	21		45.7683	32.7135	21.5181		2.7861	Back Stutter	7.82004	Forward Stutter	5.51122	85	0.0889487	0.0617066	0.044834		0.00272564	0.00258738	0.00302316
2.8.0	3-2-1_75pg_Set 1 Amp 2_rep-213976	3	2551806	12444.7	3.96208	1.1648	43	30	20		46.0849	32.5277	21.3874		2.92158	Back Stutter	10.8573	Forward Stutter	7.48449	85	0.103488	0.0573508	0.0417206		0.00345003	0.00240563	0.00281194
2.8.0	3-2-1_75pg_Set 1 Amp 2_rep-216810	3	2767873	12757.6	3.50659	1.13024	44	31	21		45.8012	32.409	21.7898		2.89015	Back Stutter	9.16001	Forward Stutter	5.72932	85	0.099666	0.0633001	0.0421856		0.00307201	0.0027957	0.00279268
2.8.0	3-2-1_75pg_Set 1 Amp 2_rep-723135	3	2797370	6174.27	3.72071	1.08648	45	32	21		45.8689	32.4717	21.6594		3.0243	Back Stutter	8.12992	Forward Stutter	5.72537	85	0.104554	0.0511731	0.0453378		0.00321211	0.00198692	0.00288849
2.8.0	3-2-1_75pg_Set 1 Amp 2_rep-848408	3	3174853	19458.2	4.28207	1.08788	44	32	20		45.7549	32.918	21.3271		2.63223	Back Stutter	9.81914	Forward Stutter	6.89042	85	0.0932257	0.0449508	0.0496622		0.00295521	0.00174167	0.00346335
2.8.0	3-2-1_75pg_Set 1 Amp 2_rep-858042	3	2955069	8107.98	4.15814	1.19619	43	31	20		45.8611	32.7006	21.4383		2.92533	Back Stutter	8.1344	Forward Stutter	5.96894	85	0.0809518	0.0502628	0.0511082		0.00248329	0.00204772	0.00367095
2.8.0	3-2-1_75pg_Set 1 Amp 2_rep-979142	3	2552252	5759.54	3.55212	1.044	44	31	20		46.4327	32.6965	20.8707		3.16184	Back Stutter	8.39136	Forward Stutter	6.67921	85	0.0916022	0.0578494	0.0466696		0.0027033	0.00235315	0.00329995
2.8.0	3-2-1_75pg_Set 1 Amp 2_rep-993333	3	2772971	12018.2	4.14075	1.06373	43	31	21		45.4466	32.6339	21.9195		3.14611	Back Stutter	8.12579	Forward Stutter	4.90755	85	0.0887113	0.069323	0.0425165		0.0026951	0.00324103	0.00273121
2.8.0	3-2-1_150pg_Set 1 Amp 1_rep-28075	3	4976048	35852.6	14.1476	1.14619	83	60	36		46.4948	33.237	20.2682		2.92921	Back Stutter	9.27929	Forward Stutter	5.81792	90	0.158612	0.0804097	0.0619013		0.00242671	0.00164026	0.00220804
2.8.0	3-2-1_150pg_Set 1 Amp 1_rep-60279	3	5109907	15676.2	13.7555	1.06937	80	58	35		46.3646	33.566	20.0694		2.82222	Back Stutter	10.5262	Forward Stutter	8.03813	90	0.134471	0.0635569	0.0494204		0.0020443	0.00123611	0.00170488
2.8.0	3-2-1_150pg_Set 1 Amp 1_rep-67655	3	4996430	16463.3	13.8688	1.06338	81	58	36		46.1015	33.2642	20.6343		2.96411	Back Stutter	10.1228	Forward Stutter	6.19337	90	0.142703	0.0744443	0.0598137		0.00219257	0.00150176	0.00210519
2.8.0	3-2-1_150pg_Set 1 Amp 1_rep-213976	3	4782123	15521.6	15.1658	1.0768	84	61	37		45.9826	33.7814	20.236		3.16761	Back Stutter	7.48884	Forward Stutter	5.41723	90	0.15017	0.0791345	0.0620993		0.00223091	0.00150609	0.00217107
2.8.0	3-2-1_150pg_Set 1 Amp 1_rep-216810	3	4713559	15542.1	14.735	1.10878	83	58	34		47.4703	33.2007	19.3291		3.00579	Back Stutter	7.50026	Forward Stutter	4.56051	90	0.154572	0.0702254	0.0639336		0.00232103	0.001383	0.00270346
2.8.0	3-2-1_150pg_Set 1 Amp 1_rep-723135	3	5109748	10623.6	16.7698	1.05007	83	59	33		47.5	33.7667	18.7332		2.4974	Back Stutter	8.94245	Forward Stutter	6.38821	90	0.148892	0.0622034	0.0609112		0.00224124	0.00117932	0.00242941
2.8.0	3-2-1_150pg_Set 1 Amp 1_rep-848408	3	4837198	27292.1	16.4094	1.13951	78	57	36		45.655	33.2384	21.1066		2.98934	Back Stutter	8.43318	Forward Stutter	6.55242	90	0.13451	0.0698043	0.0562261		0.00213498	0.00140829	0.00193419
2.8.0	3-2-1_150pg_Set 1 Amp 1_rep-858042	3	5088460	23616.1	16.1747	1.08183	83	58	35		46.948	33.1984	19.8537		2.69076	Back Stutter	9.66696	Forward Stutter	6.88864	90	0.148427	0.0670707	0.0493272		0.00223036	0.00132975	0.00177622
2.8.0	3-2-1_150pg_Set 1 Amp 1_rep-979142	3	4972932	14894.3	14.2194	1.10839	84	60	36		46.772	33.2199	20.0081		3.1621	Back Stutter	7.44079	Forward Stutter	5.90437	90	0.14981	0.0687123	0.071992		0.00218588	0.00131472	0.00282427
2.8.0	3-2-1_150pg_Set 1 Amp 1_rep-993333	3	5009289	11558.4	14.8325	1.05394	83	58	34		47.2247	33.1591	19.6163		2.65124	Back Stutter	9.48585	Forward Stutter	7.13384	90	0.163716	0.069078	0.058786		0.00252899	0.00136138	0.00223976
2.8.0	3-2-1_150pg_Set 1 Amp 2_rep-28075	3	3152530	13484.7	11.3651	1.08142	58	43	30		44.1325	32.8566	23.0109		2.91105	Back Stutter	7.72657	Forward Stutter	5.32534	85	0.125629	0.0685611	0.0579315		0.0028349	0.00198491	0.00251098
2.8.0	3-2-1_150pg_Set 1 Amp 2_rep-60279	3	3279755	12140.8	8.26425	1.06085	60	46	33		43.0831	33.0092	23.9077		2.71985	Back Stutter	11.4535	Forward Stutter	6.42546	85	0.133546	0.0914546	0.0543349		0.00298488	0.0025766	0.00205746
2.8.0	3-2-1_150pg_Set 1 Amp 2_rep-67655	3	3375820	7857.32	8.34696	1.07258	57	43	31		43.2212	32.8661	23.9126		2.7003	Back Stutter	8.39741	Forward Stutter	5.4624	85	0.112868	0.0772233	0.044806		0.00254695	0.00228753	0.00173349
2.8.0	3-2-1_150pg_Set 1 Amp 2_rep-213976	3	3185278	10456.5	9.46802	1.13965	58	44	31		43.5263	33.0419	23.4318		2.86565	Back Stutter	7.83245	Forward Stutter	7.5212	85	0.120008	0.0783231	0.0564109		0.00266234	0.00225012	0.00230269
2.8.0	3-2-1_150pg_Set 1 Amp 2_rep-216810	3	3813139	16551	11.0046	1.18174	56	42	30		43.8808	32.8229	23.2963		2.95679	Back Stutter	10.1066	Forward Stutter	6.08086	85	0.119493	0.0717207	0.0408793		0.00280248	0.00214739	0.00164532
2.8.0	3-2-1_150pg_Set 1 Amp 2_rep-723135	3	2955545	5676.82	10.1178	1.13964	58	42	29		44.9542	32.5535	22.4923		2.67459	Back Stutter	14.3615	Forward Stutter	6.00796	85	0.143467	0.0651923	0.0542739		0.00353107	0.00188025	0.00244532
2.8.0	3-2-1_150pg_Set 1 Amp 2_rep-848408	3	3900562	16696.9	7.99643	1.13707	56	42	30		43.5851	32.8322	23.5827		2.91828	Back Stutter	9.65612	Forward Stutter	6.39069	85	0.116493	0.0607405	0.0542699		0.00282082	0.00173666	0.00236401
2.8.0	3-2-1_150pg_Set 1 Amp 2_rep-858042	3	3271766	14089.6	8.02717	1.12482	56	42	29		43.7122	33.1605	23.1273		2.50891	Back Stutter	9.5176	Forward Stutter	6.3059	85	0.107293	0.0646074	0.0559197		0.00244456	0.00185165	0.00248762
2.8.0	3-2-1_150pg_Set 1 Amp 2_rep-979142	3	3014552	10618.4	7.60422	1.13615	58	43	31		43.8803	32.7575	23.3623		2.76929	Back Stutter	6.30036	Forward Stutter	4.99471	85	0.133558	0.0805604	0.0530965		0.00314422	0.00243628	0.00215579
2.8.0	3-2-1_150pg_Set 1 Amp 2_rep-993333	3	3351248	8426.42	8.92018	1.10304	53	40	28		43.7344	32.8227	23.4429		2.61793	Back Stutter	8.84798	Forward Stutter	8.07114	85	0.110725	0.0508823	0.0490833		0.00272494	0.00147622	0.00243562
2.8.0	3-2-1_228pg_Set 1 Amp 1_rep-28075	3	11390393	17684.2	21.763	1.03843	116	85	62		44.0772	32.2768	23.646		2.63753	Back Stutter	7.74328	Forward Stutter	7.51591	90	0.29189	0.141246	0.0742454		0.00352504	0.00202796	0.00136556
2.8.0	3-2-1_228pg_Set 1 Amp 1_rep-60279	3	10551418	9892.21	22.4306	1.0446	115	83	60		44.7282	32.0956	23.1762		2.57576	Back Stutter	10.9152	Forward Stutter	6.65939	90	0.294563	0.134534	0.074496		0.00357245	0.00195845	0.00144146
2.8.0	3-2-1_228pg_Set 1 Amp 1_rep-67655	3	10071459	5544.05	22.747	1.05294	118	86	61		44.3895	32.4992	23.1113		2.70253	Back Stutter	10.4341	Forward Stutter	4.45897	90	0.307325	0.161099	0.0805413		0.00369767	0.00234406	0.00153223
2.8.0	3-2-1_228pg_Set 1 Amp 1_rep-213976	3	10060643	12355.4	21.5266	1.07043	117	84	61		44.6606	32.0119	23.3275		2.78295	Back Stutter	7.07423	Forward Stutter	6.2851	90	0.310321	0.142408	0.0899517		0.00376918	0.00208372	0.00173781
2.8.0	3-2-1_228pg_Set 1 Amp 1_rep-216810	3	11036654	14835.9	20.9101	1.09113	111	82	59		43.9367	32.4988	23.5646		2.68811	Back Stutter	9.20881	Forward Stutter	6.45836	90	0.257437	0.131887	0.0603986		0.00312794	0.00194351	0.00113769
2.8.0	3-2-1_228pg_Set 1 Amp 1_rep-723135	3	10601932	13043.9	23.6672	1.00964	115	84	61		44.3453	32.249	23.4057		2.51735	Back Stutter	6.87424	Forward Stutter	5.30794	90	0.290376	0.150765	0.0615424		0.00349294	0.0022349	0.00113781
2.8.0	3-2-1_228pg_Set 1 Amp 1_rep-848408	3	9884179	7187.41	23.6342	1.05454	108	80	58		43.9373	32.4732	23.5895		2.77737	Back Stutter	8.47676	Forward Stutter	5.25954	90	0.250777	0.12367	0.0772601		0.0031339	0.00188107	0.00155056
2.8.0	3-2-1_228pg_Set 1 Amp 1_rep-858042	3	10466656	18983.4	21.7186	1.0341	118	84	61		44.8296	31.8895	23.2809		2.4207	Back Stutter	8.77736	Forward Stutter	6.68566	90	0.325354	0.141325	0.0802303		0.00401569	0.00204344	0.00151381
2.8.0	3-2-1_228pg_Set 1 Amp 1_rep-979142	3	10577899	19775.7	21.275	1.10696	115	83	60		44.4511	32.1064	23.4425		2.42944	Back Stutter	10.3178	Forward Stutter	6.02039	90	0.304342	0.142719	0.0738227		0.00381609	0.00212901	0.00140558
2.8.0	3-2-1_228pg_Set 1 Amp 1_rep-993333	3	9747977	18325.1	20.6209	1.0718	121	85	61		45.1459	31.9272	22.9268		2.76685	Back Stutter	7.55076	Forward Stutter	6.193	90	0.341562	0.146344	0.0812223		0.00419846	0.00212612	0.00155712
2.8.0	3-2-1_228pg_Set 1 Amp 2_rep-28075	3	10692157	17057.1	21.441	1.13966	136	97	70		45.0145	31.9455	23.04		3.23261	Back Stutter	8.06468	Forward Stutter	6.34355	89	0.316076	0.191244	0.107203		0.00315419	0.00253827	0.00184412
2.8.0	3-2-1_228pg_Set 1 Amp 2_rep-60279	3	11261360	13792.3	21.8297	1.17603	131	94	67		44.9479	32.0799	22.9722		3.36801	Back Stutter	7.09289	Forward Stutter	5.93626	89	0.298147	0.16705	0.0948967		0.0030773	0.00221748	0.0016524
2.8.0	3-2-1_228pg_Set 1 Amp 2_rep-67655	3	10312932	10687.5	20.7876	1.11744	131	94	67		44.8147	32.3236	22.8617		3.65393	Back Stutter	8.74087	Forward Stutter	6.17815	89	0.295587	0.194033	0.0903036		0.00305194	0.00268823	0.00159616
2.8.0	3-2-1_228pg_Set 1 Amp 2_rep-213976	3	12610363	35492.1	24.7317	1.02113	133	96	68		44.6956	32.2714	23.033		2.89536	Back Stutter	5.5993	Forward Stutter	6.56483	89	0.261549	0.186556	0.0940749		0.00254317	0.00250297	0.00160958
2.8.0	3-2-1_228pg_Set 1 Amp 2_rep-216810	3	11044592	14137.2	22.071	1.19311	129	90	64		45.5542	31.7775	22.6683		3.21007	Back Stutter	6.60432	Forward Stutter	6.26918	89	0.282238	0.143887	0.084154		0.0028835	0.00193266	0.00151323
2.8.0	3-2-1_228pg_Set 1 Amp 2_rep-723135	3	13294512	16548.3	25.0578	1.46554	137	95	68		45.6166	31.7651	22.6183		3.30099	Back Stutter	6.83596	Forward Stutter	7.69161	89	0.336488	0.161676	0.0935386		0.00341507	0.00210188	0.00161972
2.8.0	3-2-1_228pg_Set 1 Amp 2_rep-848408	3	13713177	16496	22.7783	1.04045	132	93	67		45.384	31.7853	22.8307		2.84656	Back Stutter	9.77003	Forward Stutter	6.63539	89	0.287301	0.153923	0.0837316		0.00286751	0.00203805	0.00144972
2.8.0	3-2-1_228pg_Set 1 Amp 2_rep-858042	3	10344521	15750.9	20.9813	1.06788	135	93	66		45.8983	31.7373	22.3644		3.26858	Back Stutter	8.11648	Forward Stutter	6.95178	89	0.344462	0.170997	0.0895581		0.00356658	0.0022872	0.00159559
2.8.0	3-2-1_228pg_Set 1 Amp 2_rep-979142	3	11817245	14772.8	22.6512	1.06517	136	95	68		45.5379	31.7297	22.7324		3.11697	Back Stutter	8.45867	Forward Stutter	6.211	89	0.329035	0.163697	0.09483		0.0033287	0.00213522	0.00164885
2.8.0	3-2-1_228pg_Set 1 Amp 2_rep-993333	3	13029930	10781.4	23.0066	1.04518	134	97	69		44.644	32.3232	23.0328		3.05679	Back Stutter	8.81356	Forward Stutter	5.95428	89	0.276856	0.188155	0.0872555		0.00269998	0.00248269	0.00146335
2.8.0	3-2-1_300pg_Set 1 Amp 1_rep-28075	3	6625249	20228.2	19.1784	1.07559	115	78	50		47.3433	32.1704	20.4864		3.10293	Back Stutter	9.18519	Forward Stutter	7.31536	85	0.29371	0.140223	0.0953471		0.00362239	0.00221889	0.00248624
2.8.0	3-2-1_300pg_Set 1 Amp 1_rep-60279	3	7228094	13346.3	18.5926	1.11794	112	77	49		47.1421	32.473	20.3849		2.99765	Back Stutter	11.0204	Forward Stutter	6.16894	85	0.278155	0.118557	0.0955518		0.00343109	0.00183708	0.00252491
2.8.0	3-2-1_300pg_Set 1 Amp 1_rep-67655	3	7046025	14775.3	18.0307	1.04304	113	77	50		47.0376	32.1435	20.8188		3.06953	Back Stutter	11.4238	Forward Stutter	5.21197	85	0.284512	0.14018	0.0880614		0.00354193	0.0022908	0.00224996
2.8.0	3-2-1_300pg_Set 1 Amp 1_rep-213976	3	6803691	8740.63	18.5836	1.10448	107	74	48		46.4935	32.3813	21.1252		3.08379	Back Stutter	9.1149	Forward Stutter	5.87553	85	0.257314	0.13201	0.0797388		0.0033248	0.00224514	0.00204217
2.8.0	3-2-1_300pg_Set 1 Amp 1_rep-216810	3	7617629	13208.6	18.4838	1.10771	116	79	50		47.3491	32.3094	20.3415		2.894	Back Stutter	9.85435	Forward Stutter	6.44714	85	0.293769	0.126087	0.0930096		0.0035793	0.00192467	0.00239863
2.8.0	3-2-1_300pg_Set 1 Amp 1_rep-723135	3	8660616	7329.52	18.6367	1.39884	115	79	49		47.4181	32.4787	20.1031		2.99328	Back Stutter	8.07463	Forward Stutter	6.69359	85	0.298007	0.1448	0.0950764		0.00371975	0.00232203	0.00252624
2.8.0	3-2-1_300pg_Set 1 Amp 1_rep-848408	3	7396035	15550.5	18.8062	1.06602	115	79	48		47.3152	32.6807	20.0042		2.85695	Back Stutter	9.23091	Forward Stutter	6.33578	85	0.283149	0.15253	0.0984326		0.00343988	0.00246973	0.00281311
2.8.0	3-2-1_300pg_Set 1 Amp 1_rep-858042	3	7037870	16648.4	18.7054	1.12355	120	81	51		47.403	32.1254	20.4716		3.25461	Back Stutter	9.4108	Forward Stutter	6.50909	85	0.335339	0.160256	0.0770996		0.00410979	0.00253302	0.00181144
2.8.0	3-2-1_300pg_Set 1 Amp 1_rep-979142	3	7733027	10834.5	18.4041	1.08292	117	81	51		46.8718	32.6293	20.4989		2.89255	Back Stutter	9.18586	Forward Stutter	6.72335	85	0.301994	0.162098	0.095753		0.00366226	0.00256957	0.00245944
2.8.0	3-2-1_300pg_Set 1 Amp 1_rep-993333	3	7621094	15833.5	17.9795	1.07261	117	79	50		47.5181	32.0504	20.4316		2.85147	Back Stutter	9.72603	Forward Stutter	6.10376	85	0.313613	0.136743	0.0867655		0.00390531	0.00214407	0.00215582
2.8.0	3-2-1_300pg_Set 1 Amp 2_rep-28075	3	14184422	10430.5	26.686	1.14681	208	164	108		43.3397	34.1705	22.4898		3.98929	Back Stutter	6.80385	Forward Stutter	4.53432	85	0.354467	0.246492	0.260434		0.00218868	0.00182847	0.00331878
2.8.0	3-2-1_300pg_Set 1 Amp 2_rep-60279	3	13228694	12949.1	28.3533	1.04963	204	162	107		43.0928	34.184	22.7232		4.05304	Back Stutter	8.4809	Forward Stutter	6.57006	85	0.345583	0.245295	0.265404		0.00210125	0.00199549	0.00360622
2.8.0	3-2-1_300pg_Set 1 Amp 2_rep-67655	3	17847483	23525.5	28.3797	1.15805	203	160	109		43.0339	33.9244	23.0418		4.09158	Back Stutter	8.84035	Forward Stutter	6.54544	85	0.294566	0.246884	0.259283		0.00171259	0.00194475	0.00335619
2.8.0	3-2-1_300pg_Set 1 Amp 2_rep-213976	3	17142151	21684.5	28.3225	1.20448	198	157	102		43.3956	34.3328	22.2717		4.00754	Back Stutter	8.46206	Forward Stutter	6.39625	85	0.314965	0.221493	0.222933		0.001924	0.00173004	0.00297014
2.8.0	3-2-1_300pg_Set 1 Amp 2_rep-216810	3	14101674	18297.4	29.6391	1.21609	213	166	110		43.5171	34.0301	22.4528		4.07998	Back Stutter	6.94867	Forward Stutter	5.49285	85	0.465339	0.169835	0.263457		0.00304578	0.00114943	0.00335057
2.8.0	3-2-1_300pg_Set 1 Amp 2_rep-723135	3	15571955	12420.1	28.85	1.11362	203	159	102		43.8232	34.2425	21.9343		3.34809	Back Stutter	7.97972	Forward Stutter	5.37316	85	0.310901	0.222247	0.232652		0.00183979	0.00167368	0.00306545
2.8.0	3-2-1_300pg_Set 1 Amp 2_rep-848408	3	11265029	17485.9	27.8843	1.12799	212	164	108		43.8061	33.8198	22.3741		3.74476	Back Stutter	9.95059	Forward Stutter	6.31177	85	0.390811	0.240392	0.26543		0.00230565	0.00198541	0.00357306
2.8.0	3-2-1_300pg_Set 1 Amp 2_rep-858042	3	12492874	11004.5	27.6986	1.03374	207	160	104		43.857	34.0896	22.0534		3.76222	Back Stutter	11.8065	Forward Stutter	5.99479	85	0.366947	0.182367	0.254027		0.00223255	0.00133893	0.00342168
2.8.0	3-2-1_300pg_Set 1 Amp 2_rep-979142	3	14032198	16366.4	29.952	1.31733	203	161	108		43.0466	34.0527	22.9007		4.17855	Back Stutter	7.72697	Forward Stutter	5.80067	85	0.390435	0.222693	0.249036		0.00252302	0.00164742	0.0032187
2.8.0	3-2-1_300pg_Set 1 Amp 2_rep-993333	3	14508197	26149	30.3607	1.23872	210	161	106		44.0273	33.6783	22.2943		4.19865	Back Stutter	8.97881	Forward Stutter	6.0579	85	0.422197	0.259374	0.254572		0.0026247	0.00204462	0.00330147
2.8.0	3-2-1_450pg_Set 1 Amp 1_rep-28075	3	18545747	14815.7	30.8921	1.05406	211	161	104		44.395	33.8417	21.7633		3.97349	Back Stutter	7.14066	Forward Stutter	6.44376	85	0.477953	0.270784	0.159		0.00302182	0.00206463	0.00183796
2.8.0	3-2-1_450pg_Set 1 Amp 1_rep-60279	3	21230345	19850.2	35.1559	1.2203	222	164	100		45.5609	33.8367	20.6024		3.31407	Back Stutter	6.77863	Forward Stutter	5.59711	85	0.566673	0.280932	0.140513		0.00362865	0.00214247	0.00165036
2.8.0	3-2-1_450pg_Set 1 Amp 1_rep-67655	3	21444514	17065.2	32.8062	1.07492	222	167	100		45.4044	34.1087	20.4869		3.34052	Back Stutter	7.54988	Forward Stutter	5.96886	85	0.551485	0.284879	0.127889		0.00345582	0.00210226	0.0014961
2.8.0	3-2-1_450pg_Set 1 Amp 1_rep-213976	3	21676540	9955.73	33.2454	1.11735	218	166	100		44.9332	34.3267	20.7401		3.57938	Back Stutter	7.0686	Forward Stutter	4.61659	85	0.50393	0.266375	0.1348		0.00312603	0.00194879	0.00156569
2.8.0	3-2-1_450pg_Set 1 Amp 1_rep-216810	3	21076596	20246.3	32.7865	1.12226	220	164	100		45.3738	33.9391	20.687		3.23246	Back Stutter	7.45745	Forward Stutter	9.04766	85	0.526239	0.2522	0.146177		0.00328309	0.00183772	0.00172315
2.8.0	3-2-1_450pg_Set 1 Amp 1_rep-723135	3	21644250	13603.8	33.5925	1.16392	224	166	104		45.3465	33.6491	21.0044		3.56673	Back Stutter	7.35819	Forward Stutter	4.56307	85	0.557124	0.249825	0.165239		0.00346115	0.00179964	0.00193378
2.8.0	3-2-1_450pg_Set 1 Amp 1_rep-848408	3	21013264	17507.6	32.3033	1.20938	225	166	102		45.5642	33.6613	20.7746		3.50397	Back Stutter	7.06393	Forward Stutter	7.48645	85	0.610223	0.300491	0.155934		0.00396884	0.00228857	0.00182875
2.8.0	3-2-1_450pg_Set 1 Amp 1_rep-858042	3	23426657	12255.3	32.1747	1.23967	225	166	101		45.6239	33.7798	20.5963		3.71683	Back Stutter	10.2045	Forward Stutter	6.19747	85	0.592099	0.24504	0.145391		0.00373805	0.00175859	0.00169419
2.8.0	3-2-1_450pg_Set 1 Amp 1_rep-979142	3	22661332	17133.8	32.2876	1.26917	226	168	103		45.4705	33.9108	20.6187		3.58313	Back Stutter	7.94613	Forward Stutter	7.25657	85	0.58511	0.294435	0.137127		0.00367532	0.00217047	0.00156611
2.8.0	3-2-1_450pg_Set 1 Amp 1_rep-993333	3	19848521	19823.3	31.4298	1.07264	222	168	103		45.0189	34.1183	20.8628		3.49523	Back Stutter	6.56409	Forward Stutter	5.70104	85	0.554677	0.274697	0.147045		0.00347859	0.00199945	0.00169398
2.8.0	3-2-1_450pg_Set 1 Amp 2_rep-28075	3	18283283	9130.64	32.7737	1.07823	211	163	129		41.9914	32.375	25.6337		3.43015	Back Stutter	5.42315	Forward Stutter	6.43759	85	0.546317	0.274081	0.190144		0.0036815	0.00207559	0.00180085
2.8.0	3-2-1_450pg_Set 1 Amp 2_rep-60279	3	19409386	25339.2	32.9503	1.12316	210	163	128		41.9028	32.5095	25.5877		3.26069	Back Stutter	6.3174	Forward Stutter	5.1412	85	0.546159	0.245439	0.188261		0.00385161	0.00182428	0.00175672
2.8.0	3-2-1_450pg_Set 1 Amp 2_rep-67655	3	21012724	12873	32.6458	1.16166	218	168	134		41.923	32.3361	25.7409		3.00025	Back Stutter	6.36623	Forward Stutter	8.68566	85	0.610763	0.361342	0.158591		0.00423154	0.00286841	0.00139294
2.8.0	3-2-1_450pg_Set 1 Amp 2_rep-213976	3	23060843	11758.1	33.8062	1.05624	219	167	132		42.2131	32.192	25.5949		2.80559	Back Stutter	6.28055	Forward Stutter	5.31478	85	0.669236	0.238568	0.161067		0.0048299	0.00175358	0.00141138
2.8.0	3-2-1_450pg_Set 1 Amp 2_rep-216810	3	21232211	7670.29	33.499	1.06436	207	162	127		41.6833	32.632	25.6847		3.20192	Back Stutter	5.74119	Forward Stutter	5.46715	85	0.485103	0.270814	0.210986		0.00332831	0.00205556	0.00202483
2.8.0	3-2-1_450pg_Set 1 Amp 2_rep-723135	3	24881728	13436.3	33.7135	1.11929	214	166	130		41.971	32.5064	25.5226		3.2352	Back Stutter	7.56013	Forward Stutter	7.47009	85	0.582257	0.280182	0.174439		0.00400172	0.00212468	0.00157196
2.8.0	3-2-1_450pg_Set 1 Amp 2_rep-848408	3	21031616	16739.7	33.6753	1.10467	211	162	127		42.16	32.4294	25.4106		2.97205	Back Stutter	6.05168	Forward Stutter	6.07467	85	0.500186	0.311727	0.168341		0.0032718	0.0024983	0.0015749
2.8.0	3-2-1_450pg_Set 1 Amp 2_rep-858042	3	19766617	22334.5	33.2801	1.16344	213	167	131		41.6111	32.776	25.6129		3.49171	Back Stutter	6.49029	Forward Stutter	5.34836	85	0.547247	0.324114	0.181364		0.00365157	0.00250202	0.00166347
2.8.0	3-2-1_450pg_Set 1 Amp 2_rep-979142	3	25399774	11348.7	34.0708	1.12181	207	166	130		41.1243	32.942	25.9338		2.91097	Back Stutter	9.38385	Forward Stutter	6.3779	85	0.465073	0.324259	0.212784		0.00312148	0.00252266	0.00199416
2.8.0	3-2-1_450pg_Set 1 Amp 2_rep-993333	3	20949764	26686.5	32.8976	1.08838	217	168	130		42.1673	32.5515	25.2812		2.96335	Back Stutter	6.37971	Forward Stutter	6.47164	85	0.561875	0.326244	0.201528		0.00378586	0.00251685	0.00186849
2.8.0	3-2-1_522pg_Set 1 Amp 1_rep-28075	3	14029268	7403.65	37.3449	1.19666	293	213	151		44.6298	32.3993	22.9709		4.5945	Back Stutter	5.65238	Forward Stutter	6.04028	85	0.635115	0.355547	0.288908		0.00288876	0.0020415	0.00246589
2.8.0	3-2-1_522pg_Set 1 Amp 1_rep-60279	3	14109645	14179.9	35.144	1.30883	309	217	154		45.353	31.9829	22.6642		4.18654	Back Stutter	5.56898	Forward Stutter	5.84314	85	0.723074	0.324116	0.292534		0.00322614	0.00184933	0.00242685
2.8.0	3-2-1_522pg_Set 1 Amp 1_rep-67655	3	18213499	30480.7	35.2499	1.27379	301	215	156		44.7416	32.0655	23.1928		4.22317	Back Stutter	5.10542	Forward Stutter	6.83503	85	0.661902	0.390852	0.294528		0.00296845	0.00236695	0.00242365
2.8.0	3-2-1_522pg_Set 1 Amp 1_rep-213976	3	13969182	12804.8	35.4896	1.31743	301	223	161		43.9609	32.5881	23.4511		4.83568	Back Stutter	5.21499	Forward Stutter	5.85326	85	0.672664	0.369425	0.305478		0.00299464	0.00207107	0.00246007
2.8.0	3-2-1_522pg_Set 1 Amp 1_rep-216810	3	15653084	14988.5	32.9542	1.24321	293	218	160		43.7634	32.4418	23.7949		4.5802	Back Stutter	6.83369	Forward Stutter	5.83117	85	0.612376	0.391103	0.302154		0.00274478	0.00229661	0.00240505
2.8.0	3-2-1_522pg_Set 1 Amp 1_rep-723135	3	13149079	16852.3	35.1669	1.15551	299	217	159		44.2815	32.2003	23.5182		4.42027	Back Stutter	5.70531	Forward Stutter	5.38824	85	0.68007	0.402616	0.309676		0.00312964	0.00234913	0.00248055
2.8.0	3-2-1_522pg_Set 1 Amp 1_rep-848408	3	12551915	11817.3	34.5619	1.121	283	210	150		44.0214	32.58	23.3986		4.16402	Back Stutter	5.31946	Forward Stutter	5.31452	85	0.523978	0.366354	0.253125		0.00239775	0.00220865	0.00207471
2.8.0	3-2-1_522pg_Set 1 Amp 1_rep-858042	3	16933115	13091	37.615	1.11259	289	218	160		43.2986	32.6219	24.0794		4.20957	Back Stutter	5.71277	Forward Stutter	5.97516	85	0.518762	0.405979	0.339091		0.00225773	0.00242198	0.00277321
2.8.0	3-2-1_522pg_Set 1 Amp 1_rep-979142	3	14952198	10220.6	35.0861	1.29963	296	210	152		44.8787	31.9878	23.1335		4.20879	Back Stutter	6.16589	Forward Stutter	6.73422	85	0.554983	0.420482	0.267133		0.00240712	0.00263097	0.00220606
2.8.0	3-2-1_522pg_Set 1 Amp 1_rep-993333	3	11599418	19201.6	31.6014	1.08059	292	209	149		44.9173	32.1526	22.93		4.23107	Back Stutter	5.39285	Forward Stutter	4.94689	85	0.62154	0.335069	0.249676		0.00289858	0.00199762	0.00206936
2.8.0	3-2-1_522pg_Set 1 Amp 2_rep-28075	3	15895830	22018	34.9991	1.19531	240	180	142		42.6446	32.0971	25.2583		3.80352	Back Stutter	8.44876	Forward Stutter	5.877	85	0.61936	0.354514	0.215887		0.00377613	0.00256486	0.00183559
2.8.0	3-2-1_522pg_Set 1 Amp 2_rep-60279	3	12284294	16419	31.73	1.08722	242	184	146		42.2791	32.157	25.5638		3.22176	Back Stutter	9.01723	Forward Stutter	6.47396	85	0.681471	0.3625	0.189779		0.00430677	0.00258732	0.00155206
2.8.0	3-2-1_522pg_Set 1 Amp 2_rep-67655	3	11698881	18943.6	32.1175	1.08039	234	181	144		41.7679	32.458	25.7741		3.66228	Back Stutter	9.23593	Forward Stutter	6.22075	85	0.557772	0.383122	0.243127		0.00342965	0.00278795	0.00212797
2.8.0	3-2-1_522pg_Set 1 Amp 2_rep-213976	3	12907808	19073.6	30.6082	1.06016	228	179	141		41.5574	32.6212	25.8214		3.55652	Back Stutter	7.79777	Forward Stutter	6.3831	85	0.491622	0.376548	0.220666		0.00288391	0.00281206	0.00188843
2.8.0	3-2-1_522pg_Set 1 Amp 2_rep-216810	3	15092982	15039.5	30.5346	1.07705	232	179	142		41.9561	32.3741	25.6698		3.86137	Back Stutter	8.48023	Forward Stutter	5.30317	85	0.526259	0.405094	0.216978		0.00305895	0.0030561	0.00184466
2.8.0	3-2-1_522pg_Set 1 Amp 2_rep-723135	3	14560989	17756.1	32.3011	1.15712	240	185	145		42.0534	32.4562	25.4905		3.61317	Back Stutter	10.6297	Forward Stutter	6.33198	85	0.590942	0.414709	0.237998		0.00351564	0.00298362	0.00199262
2.8.0	3-2-1_522pg_Set 1 Amp 2_rep-848408	3	11575040	22830.2	32.0095	1.09472	233	179	143		41.9805	32.3114	25.7081		3.90699	Back Stutter	8.38515	Forward Stutter	6.6078	85	0.629588	0.313555	0.220196		0.00393959	0.00218769	0.00187137
2.8.0	3-2-1_522pg_Set 1 Amp 2_rep-858042	3	13734138	13391.8	32.439	1.3291	223	173	137		41.794	32.4575	25.7486		3.71069	Back Stutter	9.28532	Forward Stutter	7.55047	85	0.516685	0.335447	0.240483		0.00325739	0.00247066	0.00215425
2.8.0	3-2-1_522pg_Set 1 Amp 2_rep-979142	3	12321045	26476.5	30.417	1.16421	239	179	141		42.7444	32.0127	25.2429		3.7845	Back Stutter	8.89579	Forward Stutter	5.2688	85	0.680017	0.340886	0.192045		0.0043615	0.00250146	0.00161788
2.8.0	3-2-1_522pg_Set 1 Amp 2_rep-993333	3	13074937	11826.3	32.6223	1.10545	224	174	139		41.7869	32.4253	25.7878		3.45832	Back Stutter	9.1757	Forward Stutter	6.13694	85	0.425016	0.356091	0.210466		0.00244797	0.00272709	0.00184065
2.8.0	3-2-1_600pg_Set 1 Amp 1_rep-28075	3	23228759	11112.4	31.086	1.36081	233	174	116		44.4268	33.349	22.2242		3.83404	Back Stutter	10.4051	Forward Stutter	6.00997	85	0.484707	0.287261	0.155939		0.00273265	0.00200308	0.00156685
2.8.0	3-2-1_600pg_Set 1 Amp 1_rep-60279	3	20962083	11770.2	32.6334	1.23705	236	173	113		45.1926	33.2115	21.5959		3.46208	Back Stutter	11.8352	Forward Stutter	5.88564	85	0.51927	0.255811	0.161967		0.00291431	0.00181091	0.00169705
2.8.0	3-2-1_600pg_Set 1 Amp 1_rep-67655	3	16827372	17538.1	32.4495	1.11739	231	175	110		44.7194	33.9428	21.3377		3.39414	Back Stutter	8.46166	Forward Stutter	7.65258	85	0.490736	0.221372	0.151836		0.00280101	0.00146913	0.00163547
2.8.0	3-2-1_600pg_Set 1 Amp 1_rep-213976	3	17766345	15851.4	33.3257	1.33619	220	170	112		43.7514	33.8463	22.4023		3.81489	Back Stutter	9.26077	Forward Stutter	4.92108	85	0.408083	0.271547	0.152278		0.00233997	0.00197489	0.00159021
2.8.0	3-2-1_600pg_Set 1 Amp 1_rep-216810	3	17847056	12108.4	32.4339	1.14674	227	170	111		44.6346	33.4428	21.9225		3.6083	Back Stutter	10.1063	Forward Stutter	5.96063	85	0.460333	0.19474	0.149084		0.00262328	0.00130831	0.00156596
2.8.0	3-2-1_600pg_Set 1 Amp 1_rep-723135	3	14678272	17011.7	31.4369	1.19364	234	173	112		45.073	33.2751	21.6519		3.41942	Back Stutter	9.43432	Forward Stutter	5.46819	85	0.545345	0.238934	0.168586		0.00317407	0.00164305	0.00181423
2.8.0	3-2-1_600pg_Set 1 Amp 1_rep-848408	3	14148420	14659.2	33.8211	1.10832	224	168	110		44.5679	33.4729	21.9592		3.74428	Back Stutter	8.41713	Forward Stutter	6.44348	85	0.426154	0.247592	0.153791		0.00241644	0.00179132	0.00165564
2.8.0	3-2-1_600pg_Set 1 Amp 1_rep-858042	3	17423718	16455.3	30.2891	1.03782	228	169	114		44.5735	33.1848	22.2417		3.5664	Back Stutter	10.4341	Forward Stutter	6.23397	85	0.482477	0.235059	0.150096		0.00278429	0.00163231	0.00154576
2.8.0	3-2-1_600pg_Set 1 Amp 1_rep-979142	3	15840045	18120	31.5274	1.15608	217	165	108		44.2846	33.6511	22.0643		3.44676	Back Stutter	11.6123	Forward Stutter	5.17557	85	0.390509	0.210058	0.160221		0.00223344	0.00149359	0.00176016
2.8.0	3-2-1_600pg_Set 1 Amp 1_rep-993333	3	16931389	12479	32.9189	1.26642	230	172	113		44.6073	33.4586	21.9341		4.10198	Back Stutter	8.91212	Forward Stutter	5.59474	85	0.456175	0.241264	0.153661		0.00256611	0.00166338	0.00159687
2.8.0	3-2-1_600pg_Set 1 Amp 2_rep-28075	3	14030487	59474	38.4699	1.27473	389	201	150		52.5173	27.1895	20.2932		3.78211	Back Stutter	4.85812	Forward Stutter	4.8473	85	0.897575	0.371224	0.185624		0.00314066	0.00242558	0.00143442
2.8.0	3-2-1_600pg_Set 1 Amp 2_rep-60279	3	14176528	11054.9	36.8341	1.15417	388	194	148		53.0809	26.6027	20.3164		3.58345	Back Stutter	5.55028	Forward Stutter	5.85605	85	0.909883	0.31358	0.191311		0.00318132	0.00198015	0.00151027
2.8.0	3-2-1_600pg_Set 1 Amp 2_rep-67655	3	11209540	9784.19	38.7089	1.13058	396	205	158		52.1131	27.0453	20.8416		3.80776	Back Stutter	6.15829	Forward Stutter	6.16772	85	0.876531	0.365782	0.196295		0.00291758	0.00220916	0.00144268
2.8.0	3-2-1_600pg_Set 1 Amp 2_rep-213976	3	14947804	12813.2	37.4759	1.47904	372	196	148		51.906	27.441	20.653		4.29029	Back Stutter	4.28399	Forward Stutter	5.87993	85	0.87623	0.300107	0.2154		0.00323804	0.0018672	0.00174041
2.8.0	3-2-1_600pg_Set 1 Amp 2_rep-216810	3	12143984	8668.11	37.2587	1.25549	391	206	157		51.895	27.3061	20.7989		4.01541	Back Stutter	6.82062	Forward Stutter	7.3845	85	0.961863	0.376847	0.227844		0.0034008	0.00233613	0.00172918
2.8.0	3-2-1_600pg_Set 1 Amp 2_rep-723135	3	15289409	10129.7	38.418	1.151	400	197	153		53.3449	26.2999	20.3552		3.26956	Back Stutter	5.01282	Forward Stutter	5.41774	85	0.997732	0.344765	0.217329		0.00350865	0.0021999	0.00171444
2.8.0	3-2-1_600pg_Set 1 Amp 2_rep-848408	3	17058860	12528.9	37.481	1.20915	384	204	155		51.6915	27.4379	20.8706		3.97203	Back Stutter	5.06839	Forward Stutter	6.37375	85	0.904081	0.333352	0.214871		0.00319379	0.00202146	0.00162785
2.8.0	3-2-1_600pg_Set 1 Amp 2_rep-858042	3	12070131	9799.03	39.1714	1.10466	389	203	154		52.1364	27.253	20.6105		3.86425	Back Stutter	5.40699	Forward Stutter	5.52648	85	0.862072	0.319537	0.179614		0.00293561	0.00190627	0.00133423
2.8.0	3-2-1_600pg_Set 1 Amp 2_rep-979142	3	12046131	22425.2	38.1508	1.15686	391	205	155		52.1013	27.2807	20.618		3.94187	Back Stutter	4.64798	Forward Stutter	6.79481	85	0.920627	0.331597	0.21664		0.00318887	0.00196855	0.00165746
2.8.0	3-2-1_600pg_Set 1 Amp 2_rep-993333	3	16211676	11595.1	35.54	1.35782	385	204	157		51.54	27.3574	21.1026		4.43037	Back Stutter	4.48482	Forward Stutter	8.13895	85	0.926788	0.315171	0.223192		0.003276	0.00186188	0.0016684
2.8.0	3-2-1_1.2ng_Set 2 Amp 1_rep-35262	3	16229581	8003.64	41.4164	1.07504	546	448	152		47.6415	39.0981	13.2604		5.09011	Back Stutter	5.10813	Forward Stutter	5.26193	85	0.911148	0.613805	0.271505		0.00203338	0.00159953	0.00221134
2.8.0	3-2-1_1.2ng_Set 2 Amp 1_rep-104565	3	15458633	13639	40.4253	1.07804	536	442	159		47.181	38.8685	13.9505		5.09105	Back Stutter	5.57976	Forward Stutter	5.97364	85	0.819728	0.52657	0.314451		0.0018246	0.00136112	0.00251334
2.8.0	3-2-1_1.2ng_Set 2 Amp 1_rep-562810	3	14998969	11079.7	43.2196	1.13353	547	452	153		47.4766	39.2365	13.2869		5.45019	Back Stutter	5.13411	Forward Stutter	4.73591	85	0.964255	0.576592	0.279772		0.00218022	0.00147304	0.00227336
2.8.0	3-2-1_1.2ng_Set 2 Amp 1_rep-626603	3	13278269	21986.6	43.3339	1.09359	564	459	160		47.6735	38.8244	13.502		5.05912	Back Stutter	4.64715	Forward Stutter	5.07392	85	1.05534	0.72955	0.332432		0.00235152	0.00191733	0.00269503
2.8.0	3-2-1_1.2ng_Set 2 Amp 1_rep-655450	3	19276954	13307.4	43.6983	1.13361	549	447	154		47.7098	38.8733	13.4169		5.37597	Back Stutter	5.05373	Forward Stutter	6.70798	85	0.981256	0.536472	0.283165		0.0022184	0.00137226	0.002288
2.8.0	3-2-1_1.2ng_Set 2 Amp 1_rep-803747	3	15630922	16428.2	41.446	1.12478	530	440	150		47.3178	39.2757	13.4065		5.23878	Back Stutter	4.83646	Forward Stutter	6.36802	85	0.754809	0.504056	0.251157		0.00167795	0.00130149	0.00203561
2.8.0	3-2-1_1.2ng_Set 2 Amp 1_rep-874844	3	14938729	14368.2	41.2879	1.04885	535	443	155		47.2526	39.0717	13.6756		4.69721	Back Stutter	5.45262	Forward Stutter	6.50727	85	0.816532	0.607745	0.298977		0.00181544	0.00160115	0.00243514
2.8.0	3-2-1_1.2ng_Set 2 Amp 1_rep-887628	3	19645723	19095.2	42.9568	1.12488	562	462	159		47.5252	39.0224	13.4524		4.76103	Back Stutter	4.85365	Forward Stutter	5.73257	85	0.942304	0.58114	0.289751		0.0020508	0.00144953	0.00226461
2.8.0	3-2-1_1.2ng_Set 2 Amp 1_rep-952324	3	16963362	15728	42.2729	1.01891	546	450	157		47.3888	39.034	13.5772		4.8939	Back Stutter	4.9643	Forward Stutter	7.41832	85	0.895591	0.577768	0.299163		0.00199872	0.00148602	0.00240838
2.8.0	3-2-1_1.2ng_Set 2 Amp 1_rep-960932	3	14236132	11868.8	42.0547	1.08316	536	442	156		47.2613	38.9595	13.7792		5.06511	Back Stutter	4.84068	Forward Stutter	5.81013	85	0.834156	0.609659	0.309348		0.00186803	0.00161177	0.00251957
2.8.0	3-2-1_1.2ng_Set 2 Amp 2_rep-35262	3	14225242	15051.1	67.0621	1.05494	1086	755	307		50.5644	35.1371	14.2985		2.33929	Back Stutter	8.15637	Forward Stutter	4.19469	85	2.49086	0.694918	0.417966		0.00306488	0.00101639	0.00158697
2.8.0	3-2-1_1.2ng_Set 2 Amp 2_rep-104565	3	12058064	18173.7	66.4719	1.01583	1081	753	307		50.4796	35.1749	14.3455		2.25839	Back Stutter	7.74799	Forward Stutter	3.71656	85	2.45102	0.677129	0.415816		0.00302476	0.000992953	0.00158166
2.8.0	3-2-1_1.2ng_Set 2 Amp 2_rep-562810	3	18249341	17188.9	67.1535	1.04841	1077	754	307		50.3709	35.2832	14.3458		2.29478	Back Stutter	8.07388	Forward Stutter	6.91892	85	2.40686	0.641701	0.400206		0.00296012	0.000932704	0.00151115
2.8.0	3-2-1_1.2ng_Set 2 Amp 2_rep-626603	3	15956039	13748	66.8118	1.10553	1065	748	303		50.3166	35.3418	14.3415		2.37342	Back Stutter	7.711	Forward Stutter	4.9135	85	2.37649	0.624862	0.389832		0.00295051	0.000915857	0.00148442
2.8.0	3-2-1_1.2ng_Set 2 Amp 2_rep-655450	3	13078099	19956.2	66.6685	1.03612	1063	741	302		50.4495	35.2018	14.3488		2.34463	Back Stutter	7.92953	Forward Stutter	5.93298	85	2.4067	0.650847	0.405063		0.00300793	0.000964903	0.00155636
2.8.0	3-2-1_1.2ng_Set 2 Amp 2_rep-803747	3	13102629	17283.3	67.2014	1.01384	1090	756	308		50.5946	35.111	14.2944		2.23719	Back Stutter	7.99834	Forward Stutter	4.08773	85	2.47888	0.64925	0.403182		0.0030339	0.000938677	0.0015158
2.8.0	3-2-1_1.2ng_Set 2 Amp 2_rep-874844	3	19558062	11426.5	66.8145	1.04237	1066	741	302		50.5061	35.1562	14.3377		2.28856	Back Stutter	7.33504	Forward Stutter	5.21861	85	2.40884	0.617568	0.396613		0.00300441	0.000910841	0.001521
2.8.0	3-2-1_1.2ng_Set 2 Amp 2_rep-887628	3	15634621	14504	67.2235	1.01882	1060	748	305		50.1762	35.4065	14.4173		2.26185	Back Stutter	7.75539	Forward Stutter	5.77102	85	2.3598	0.683954	0.411968		0.00294084	0.00100965	0.0015749
2.8.0	3-2-1_1.2ng_Set 2 Amp 2_rep-952324	3	15765216	23741.5	66.9	1.03358	1078	753	307		50.43	35.2074	14.3625		2.32522	Back Stutter	7.55567	Forward Stutter	5.0588	85	2.45223	0.6549	0.415175		0.00303705	0.000958262	0.00157945
2.8.0	3-2-1_1.2ng_Set 2 Amp 2_rep-960932	3	12873955	17730	66.94	1.01773	1065	741	303		50.4886	35.1562	14.3552		2.26889	Back Stutter	7.37843	Forward Stutter	5.10151	85	2.37509	0.603369	0.391399		0.00295201	0.000888812	0.00149547
2.8.0	3-2-1_38pg_Set 2 Amp 1_rep-35262	3	1267533	284.914	-6.17269	1.10606	41	23	11		54.5807	30.5964	14.8229		4.02526	Back Stutter	9.08633	Forward Stutter	7.6159	152	0.127353	0.067962	0.0312018		0.00516097	0.00457593	0.00431324
2.8.0	3-2-1_38pg_Set 2 Amp 1_rep-104565	3	1281549	480.179	-6.10479	1.16885	38	22	11		54.071	30.8914	15.0376		3.98509	Back Stutter	10.3871	Forward Stutter	8.5786	152	0.110214	0.0621738	0.0283673		0.00457884	0.00441959	0.0040988
2.8.0	3-2-1_38pg_Set 2 Amp 1_rep-562810	3	1292103	522.108	-6.09766	1.08004	39	22	11		54.371	30.6185	15.0105		3.45874	Back Stutter	8.92686	Forward Stutter	5.6084	152	0.127647	0.0635665	0.0325246		0.0053593	0.00445863	0.00487154
2.8.0	3-2-1_38pg_Set 2 Amp 1_rep-626603	3	1248765	402.449	-5.86327	1.07672	41	23	11		53.9961	30.9575	15.0464		3.76225	Back Stutter	7.66741	Forward Stutter	5.80055	152	0.142703	0.0737898	0.0332326		0.00612001	0.00518109	0.00468853
2.8.0	3-2-1_38pg_Set 2 Amp 1_rep-655450	3	1238849	341.668	-5.91082	1.01516	42	23	11		54.6131	30.5855	14.8014		4.07429	Back Stutter	8.70972	Forward Stutter	5.94652	152	0.134006	0.0731572	0.0321336		0.00521955	0.0050864	0.00439049
2.8.0	3-2-1_38pg_Set 2 Amp 1_rep-803747	3	1271775	262.235	-5.87692	1.15516	39	22	10		54.3093	30.9253	14.7655		3.43277	Back Stutter	8.03825	Forward Stutter	6.41826	152	0.133756	0.0714496	0.0322712		0.00617964	0.00551478	0.00488922
2.8.0	3-2-1_38pg_Set 2 Amp 1_rep-874844	3	1285768	443.989	-5.81286	1.07332	40	23	11		53.7915	31.1953	15.0132		3.68682	Back Stutter	8.9058	Forward Stutter	5.6721	152	0.113326	0.0768311	0.0332769		0.00429693	0.00553924	0.0047012
2.8.0	3-2-1_38pg_Set 2 Amp 1_rep-887628	3	1164771	302.36	-6.17058	1.06737	43	24	12		54.7967	30.6326	14.5707		5.04155	Back Stutter	12.0833	Forward Stutter	6.3873	152	0.138436	0.0748073	0.0357428		0.00517026	0.00484532	0.00492583
2.8.0	3-2-1_38pg_Set 2 Amp 1_rep-952324	3	1286911	414.29	-6.07721	1.11891	38	21	10		54.4401	30.8161	14.7438		3.64001	Back Stutter	9.99383	Forward Stutter	6.10631	152	0.125218	0.0691778	0.0306202		0.00555261	0.00526637	0.00506234
2.8.0	3-2-1_38pg_Set 2 Amp 1_rep-960932	3	1256378	397.728	-6.04276	1.16706	41	23	11		54.6495	30.5683	14.7822		4.31765	Back Stutter	9.66866	Forward Stutter	5.94047	152	0.127955	0.0652177	0.0346633		0.0050154	0.00434772	0.00511425
2.8.0	3-2-1_38pg_Set 2 Amp 2_rep-35262	3	1742516	927.056	-3.33078	1.19172	41	26	15		49.9185	32.16	17.9214		3.08164	Back Stutter	8.23237	Forward Stutter	5.68722	106	0.12351	0.0717367	0.0391409		0.00480048	0.00406114	0.00402011
2.8.0	3-2-1_38pg_Set 2 Amp 2_rep-104565	3	1674924	1361.11	-3.45047	1.06287	40	26	14		50.1052	32.3132	17.5817		3.11482	Back Stutter	10.0777	Forward Stutter	5.91067	106	0.112007	0.0718854	0.0338035		0.00422634	0.00422292	0.00341397
2.8.0	3-2-1_38pg_Set 2 Amp 2_rep-562810	3	1741960	991.112	-3.35307	1.08254	44	28	15		50.0502	32.3153	17.6345		2.87563	Back Stutter	8.37073	Forward Stutter	7.25815	106	0.133012	0.0869666	0.0428047		0.00486734	0.00496796	0.00421424
2.8.0	3-2-1_38pg_Set 2 Amp 2_rep-626603	3	1903704	1225.81	-3.88606	1.15424	41	26	14		50.7329	32.0801	17.187		3.61221	Back Stutter	9.03739	Forward Stutter	9.26264	106	0.121647	0.0711759	0.0463034		0.0044207	0.00412015	0.00549722
2.8.0	3-2-1_38pg_Set 2 Amp 2_rep-655450	3	1679991	1061.49	-3.31694	1.13274	43	27	15		51.0072	31.6704	17.3224		3.66593	Back Stutter	7.47303	Forward Stutter	7.2883	106	0.131118	0.0682632	0.0400313		0.00475774	0.00366736	0.00417766
2.8.0	3-2-1_38pg_Set 2 Amp 2_rep-803747	3	1726519	1644.53	-3.25634	1.15383	41	26	14		50.056	32.4172	17.5268		3.05947	Back Stutter	7.1659	Forward Stutter	6.46331	106	0.108233	0.0769734	0.0404103		0.00382693	0.0045078	0.00440653
2.8.0	3-2-1_38pg_Set 2 Amp 2_rep-874844	3	1796152	1134.62	-3.04455	1.18038	40	26	14		50.125	32.3064	17.5686		3.46048	Back Stutter	7.02462	Forward Stutter	7.59513	106	0.106404	0.0714349	0.0345236		0.00378365	0.00406808	0.00338003
2.8.0	3-2-1_38pg_Set 2 Amp 2_rep-887628	3	1651978	1094.5	-3.43335	1.05769	44	29	16		49.846	32.2223	17.9317		3.47683	Back Stutter	9.05385	Forward Stutter	7.70858	106	0.142352	0.0819217	0.0489402		0.00519856	0.00439193	0.00480022
2.8.0	3-2-1_38pg_Set 2 Amp 2_rep-952324	3	1740270	1085.51	-3.34681	1.02264	44	28	16		50.2482	32.0493	17.7025		3.23639	Back Stutter	9.22196	Forward Stutter	5.31124	106	0.13915	0.0861051	0.0430582		0.00501085	0.00477342	0.00413973
2.8.0	3-2-1_38pg_Set 2 Amp 2_rep-960932	3	1988974	910.353	-3.21092	1.21936	43	27	15		50.8132	32.0113	17.1755		3.30068	Back Stutter	9.1634	Forward Stutter	5.49392	106	0.137608	0.0590727	0.0435818		0.00516205	0.00289123	0.00473659
2.8.0	3-2-1_150pg_Set 2 Amp 1_rep-35262	3	7060951	23808.5	17.6085	1.07834	103	77	54		44.0833	32.9293	22.9874		2.7277	Back Stutter	10.8537	Forward Stutter	6.40747	85	0.2735	0.184443	0.107536		0.00384906	0.0034073	0.00269297
2.8.0	3-2-1_150pg_Set 2 Amp 1_rep-104565	3	6962033	10934.6	18.3569	1.0716	103	75	52		44.6655	32.7052	22.6292		2.64299	Back Stutter	9.43104	Forward Stutter	5.77655	85	0.273757	0.159624	0.0920728		0.00384293	0.00286643	0.00225879
2.8.0	3-2-1_150pg_Set 2 Amp 1_rep-562810	3	7076395	20911.6	18.5951	1.07566	102	73	50		45.2991	32.3064	22.3945		2.79454	Back Stutter	11.183	Forward Stutter	6.0152	85	0.277712	0.145007	0.0938664		0.00395763	0.002626	0.0023669
2.8.0	3-2-1_150pg_Set 2 Amp 1_rep-626603	3	7196439	9098.15	21.7157	1.05521	101	74	51		44.6799	32.6434	22.6766		2.49129	Back Stutter	9.65403	Forward Stutter	6.36897	85	0.260286	0.167586	0.085617		0.00368162	0.0030891	0.00206595
2.8.0	3-2-1_150pg_Set 2 Amp 1_rep-655450	3	6449958	15588.3	18.4779	1.03013	100	73	50		44.6886	32.6758	22.6356		2.85638	Back Stutter	8.59329	Forward Stutter	8.09362	85	0.265907	0.148282	0.0882843		0.0038326	0.00266279	0.00219673
2.8.0	3-2-1_150pg_Set 2 Amp 1_rep-803747	3	6789084	11069.8	18.9726	1.11069	103	74	51		45.288	32.5197	22.1923		2.54026	Back Stutter	12.4098	Forward Stutter	7.89081	85	0.292457	0.151487	0.0930887		0.00421401	0.00266099	0.00229753
2.8.0	3-2-1_150pg_Set 2 Amp 1_rep-874844	3	7548307	29147.6	18.8546	1.10862	104	76	52		45.0248	32.6804	22.2948		2.59144	Back Stutter	8.92991	Forward Stutter	5.19464	85	0.285569	0.162426	0.0915113		0.00405073	0.00284787	0.00222206
2.8.0	3-2-1_150pg_Set 2 Amp 1_rep-887628	3	7037160	13680.9	17.6794	1.03637	104	75	51		45.3443	32.475	22.1807		2.71808	Back Stutter	8.07729	Forward Stutter	6.80321	85	0.281891	0.155834	0.0830685		0.00389717	0.00271967	0.00200732
2.8.0	3-2-1_150pg_Set 2 Amp 1_rep-952324	3	7003408	23640.8	18.0428	1.03695	98	73	50		44.4274	32.943	22.6295		2.78359	Back Stutter	7.79622	Forward Stutter	4.97477	85	0.248649	0.146984	0.0877404		0.00354284	0.00260201	0.00220551
2.8.0	3-2-1_150pg_Set 2 Amp 1_rep-960932	3	6947162	14465.3	18.7088	1.14376	98	72	50		44.6346	32.7264	22.6389		3.09874	Back Stutter	8.5576	Forward Stutter	4.58537	85	0.254932	0.136609	0.0794142		0.00366321	0.00241287	0.0019257
2.8.0	3-2-1_150pg_Set 2 Amp 2_rep-35262	3	8790176	11567.5	17.8813	1.01986	90	66	46		44.5431	32.5245	22.9324		2.46264	Back Stutter	10.7717	Forward Stutter	4.67979	85	0.221365	0.137588	0.0767044		0.00339621	0.00274845	0.00201785
2.8.0	3-2-1_150pg_Set 2 Amp 2_rep-104565	3	8869256	8244.44	19.2589	1.08856	93	66	46		45.1976	32.1284	22.674		2.5048	Back Stutter	8.29425	Forward Stutter	5.53192	85	0.248846	0.132204	0.0660919		0.00394255	0.00259409	0.00169099
2.8.0	3-2-1_150pg_Set 2 Amp 2_rep-562810	3	10350857	13369.2	20.3311	1.08424	93	66	47		44.9538	32.0481	22.9981		2.41523	Back Stutter	7.47897	Forward Stutter	5.27561	85	0.247278	0.118602	0.0662384		0.00389283	0.002254	0.00165654
2.8.0	3-2-1_150pg_Set 2 Amp 2_rep-626603	3	8248421	22075.3	19.0226	1.12473	92	65	47		45.0971	31.9549	22.948		2.58463	Back Stutter	8.95359	Forward Stutter	4.81142	85	0.254843	0.122832	0.0785914		0.00404496	0.00239694	0.00205759
2.8.0	3-2-1_150pg_Set 2 Amp 2_rep-655450	3	8570876	12417.2	17.9843	1.04168	93	66	46		45.2535	32.1405	22.606		2.67774	Back Stutter	9.7609	Forward Stutter	6.10758	85	0.242947	0.123392	0.0641494		0.00374526	0.00240037	0.00163007
2.8.0	3-2-1_150pg_Set 2 Amp 2_rep-803747	3	9348641	15546.6	18.0277	1.0866	91	67	47		44.3824	32.7058	22.9119		2.80685	Back Stutter	8.55537	Forward Stutter	7.27751	85	0.220447	0.145079	0.0666384		0.00332609	0.00285778	0.00167081
2.8.0	3-2-1_150pg_Set 2 Amp 2_rep-874844	3	8870570	10227.1	19.5472	1.03381	92	66	47		44.7505	32.2768	22.9727		2.57399	Back Stutter	8.1771	Forward Stutter	7.84974	85	0.254225	0.127277	0.0717366		0.0040398	0.00242718	0.0018337
2.8.0	3-2-1_150pg_Set 2 Amp 2_rep-887628	3	9585347	10415.1	19.163	1.05861	87	65	47		43.7112	32.8072	23.4816		2.49738	Back Stutter	7.4844	Forward Stutter	6.03469	85	0.20787	0.12552	0.0618308		0.00329761	0.0024924	0.00155006
2.8.0	3-2-1_150pg_Set 2 Amp 2_rep-952324	3	8739126	22034.2	18.6236	1.0265	93	65	45		45.5891	32.0249	22.386		2.58423	Back Stutter	10.6016	Forward Stutter	6.48129	85	0.251884	0.109869	0.0608831		0.00395457	0.00207172	0.00157633
2.8.0	3-2-1_150pg_Set 2 Amp 2_rep-960932	3	9328315	26396.5	18.105	1.1347	90	66	47		44.3153	32.4434	23.2413		2.68751	Back Stutter	10.4098	Forward Stutter	5.63554	85	0.218181	0.131296	0.0693221		0.00338959	0.00260249	0.00179435
2.8.0	3-2-1_300pg_Set 2 Amp 1_rep-35262	3	16881818	21415.8	27.2684	1.20385	211	149	94		46.5137	32.8885	20.5978		4.43674	Back Stutter	8.08901	Forward Stutter	5.94225	85	0.348298	0.191022	0.213178		0.00209054	0.00150892	0.00315644
2.8.0	3-2-1_300pg_Set 2 Amp 1_rep-104565	3	14234735	15201.7	28.9512	1.17491	213	148	93		46.958	32.5497	20.4922		3.89562	Back Stutter	8.53059	Forward Stutter	7.48546	85	0.311926	0.131034	0.269064		0.00175632	0.000980679	0.00432667
2.8.0	3-2-1_300pg_Set 2 Amp 1_rep-562810	3	12072240	12925.2	28.9413	1.11536	212	147	91		47.0869	32.7049	20.2082		4.24221	Back Stutter	10.9135	Forward Stutter	6.96261	85	0.323324	0.177814	0.239288		0.00183696	0.00144817	0.00386767
2.8.0	3-2-1_300pg_Set 2 Amp 1_rep-626603	3	14350194	22164.9	28.3839	1.16613	217	150	98		46.7444	32.1654	21.0902		4.22694	Back Stutter	6.42464	Forward Stutter	8.41861	85	0.339443	0.242833	0.23986		0.00188006	0.00232116	0.00364324
2.8.0	3-2-1_300pg_Set 2 Amp 1_rep-655450	3	12534199	16532.4	29.3596	1.16768	210	144	90		47.2846	32.5052	20.2102		3.60482	Back Stutter	7.05704	Forward Stutter	5.12048	85	0.290943	0.202391	0.207199		0.001637	0.00200894	0.00335747
2.8.0	3-2-1_300pg_Set 2 Amp 1_rep-803747	3	12188068	9341.65	29.7617	1.06984	207	145	90		46.9416	32.7866	20.2718		3.85883	Back Stutter	7.26374	Forward Stutter	8.16408	85	0.289662	0.177755	0.217338		0.00164137	0.00161417	0.0035299
2.8.0	3-2-1_300pg_Set 2 Amp 1_rep-874844	3	12966028	16508.1	28.5489	1.07999	213	147	88		47.5698	32.8076	19.6227		4.16886	Back Stutter	7.1533	Forward Stutter	6.314	85	0.328137	0.20409	0.192618		0.00187374	0.00179119	0.00304365
2.8.0	3-2-1_300pg_Set 2 Amp 1_rep-887628	3	14945089	18831.3	28.2546	1.11734	212	146	95		46.8185	32.3366	20.8449		4.04833	Back Stutter	7.89415	Forward Stutter	9.15693	85	0.290778	0.220062	0.219344		0.00159545	0.00204087	0.00328874
2.8.0	3-2-1_300pg_Set 2 Amp 1_rep-952324	3	12131065	11552.9	27.5999	1.16897	210	147	97		46.2503	32.4396	21.3101		3.7679	Back Stutter	7.23471	Forward Stutter	8.83053	85	0.279437	0.306431	0.183648		0.00154582	0.00327581	0.00276872
2.8.0	3-2-1_300pg_Set 2 Amp 1_rep-960932	3	13785774	13652.7	27.2972	1.15668	210	148	91		46.8586	33.0252	20.1162		4.08325	Back Stutter	8.24585	Forward Stutter	6.54968	85	0.290731	0.177322	0.237308		0.00162204	0.00137747	0.00373735
2.8.0	3-2-1_300pg_Set 2 Amp 2_rep-35262	3	9179192	5342.22	28.2597	1.11099	197	134	81		47.7094	32.5603	19.7303		3.61197	Back Stutter	6.32002	Forward Stutter	5.18553	85	0.431577	0.222799	0.0837076		0.00291995	0.00205494	0.00116069
2.8.0	3-2-1_300pg_Set 2 Amp 2_rep-104565	3	11623784	17190.5	28.5923	1.13163	192	135	79		47.3384	33.264	19.3976		3.1691	Back Stutter	7.35857	Forward Stutter	7.08286	85	0.41011	0.216344	0.0905159		0.00284044	0.00197583	0.00130952
2.8.0	3-2-1_300pg_Set 2 Amp 2_rep-562810	3	9414481	21115.8	26.8488	1.11512	199	132	82		48.0923	32.0395	19.8682		3.88786	Back Stutter	7.54149	Forward Stutter	8.66895	85	0.528135	0.233116	0.119069		0.00385205	0.00219771	0.00172833
2.8.0	3-2-1_300pg_Set 2 Amp 2_rep-626603	3	12670582	15768.5	26.4544	1.20759	208	138	82		48.5103	32.2065	19.2832		3.66887	Back Stutter	7.28168	Forward Stutter	5.96423	85	0.5196	0.245779	0.0910966		0.00349158	0.00222238	0.00124937
2.8.0	3-2-1_300pg_Set 2 Amp 2_rep-655450	3	8430260	10392.9	26.953	1.15678	201	140	85		47.1003	32.8831	20.0166		3.75198	Back Stutter	7.79715	Forward Stutter	5.21292	85	0.503471	0.272699	0.122013		0.00350911	0.00250237	0.00167581
2.8.0	3-2-1_300pg_Set 2 Amp 2_rep-803747	3	11639927	14565.6	27.5817	1.2286	199	137	85		47.3029	32.4744	20.2227		3.93183	Back Stutter	6.83844	Forward Stutter	5.3752	85	0.48407	0.228881	0.118785		0.00334813	0.00204808	0.00165821
2.8.0	3-2-1_300pg_Set 2 Amp 2_rep-874844	3	10820590	17491.8	24.6259	1.16814	191	132	82		47.1001	32.5644	20.3355		4.19448	Back Stutter	6.5975	Forward Stutter	7.6572	85	0.434214	0.231412	0.0994982		0.00304142	0.00215337	0.00138741
2.8.0	3-2-1_300pg_Set 2 Amp 2_rep-887628	3	8715379	14059	26.5313	1.1751	197	137	83		47.1532	32.8784	19.9684		3.7824	Back Stutter	7.33047	Forward Stutter	5.04703	85	0.43575	0.25276	0.0949392		0.00291954	0.00232392	0.00129554
2.8.0	3-2-1_300pg_Set 2 Amp 2_rep-952324	3	8828783	18011.6	27.7765	1.08027	199	135	81		47.9246	32.513	19.5624		3.50572	Back Stutter	5.87932	Forward Stutter	6.91357	85	0.453757	0.243093	0.0878049		0.00304988	0.00227253	0.0012085
2.8.0	3-2-1_300pg_Set 2 Amp 2_rep-960932	3	8588219	18728.7	25.4141	1.11973	203	133	85		48.11	31.6718	20.2182		4.12579	Back Stutter	5.66863	Forward Stutter	6.62149	85	0.511138	0.220535	0.119794		0.00353739	0.00202239	0.00166146
2.8.0	3-2-1_522pg_Set 2 Amp 1_rep-35262	3	23857794	13139.7	40.3614	1.06469	401	286	141		48.4752	34.5637	16.9611		3.23697	Back Stutter	6.7522	Forward Stutter	7.23303	85	0.554224	0.231393	0.37505		0.00161184	0.00088224	0.0037942
2.8.0	3-2-1_522pg_Set 2 Amp 1_rep-104565	3	16840242	21261.4	40.5744	1.05811	408	288	134		49.1212	34.7334	16.1454		3.45525	Back Stutter	6.92875	Forward Stutter	7.73046	85	0.616721	0.248636	0.335535		0.00179852	0.000946994	0.00345954
2.8.0	3-2-1_522pg_Set 2 Amp 1_rep-562810	3	20148584	9779.76	40.9022	1.03684	416	284	147		49.0966	33.6192	17.2842		3.43778	Back Stutter	5.82614	Forward Stutter	7.02457	85	0.643209	0.322008	0.316732		0.00184562	0.00162565	0.00314787
2.8.0	3-2-1_522pg_Set 2 Amp 1_rep-626603	3	23497044	19112.9	39.6938	1.21094	414	283	147		49.0423	33.6391	17.3186		3.58807	Back Stutter	5.69822	Forward Stutter	5.75228	85	0.678712	0.335419	0.327601		0.00197796	0.00174957	0.00330879
2.8.0	3-2-1_522pg_Set 2 Amp 1_rep-655450	3	19765551	28303	39.6683	1.0705	402	288	142		48.3299	34.6247	17.0454		3.71505	Back Stutter	5.27605	Forward Stutter	5.17011	85	0.57301	0.223757	0.378631		0.00167941	0.000846297	0.0038214
2.8.0	3-2-1_522pg_Set 2 Amp 1_rep-803747	3	16929740	14115.5	38.9519	1.07637	400	287	138		48.5134	34.7459	16.7407		3.51785	Back Stutter	6.66443	Forward Stutter	7.24569	85	0.586135	0.229809	0.36245		0.00173488	0.00087368	0.0037228
2.8.0	3-2-1_522pg_Set 2 Amp 1_rep-874844	3	17521437	18235.4	39.0741	1.11041	409	285	140		49.0099	34.2109	16.7791		3.52541	Back Stutter	5.28193	Forward Stutter	5.53763	85	0.601664	0.22351	0.369736		0.00174673	0.000853037	0.00375989
2.8.0	3-2-1_522pg_Set 2 Amp 1_rep-887628	3	18778798	15527.1	40.0524	1.12677	413	290	143		48.8486	34.3112	16.8402		3.54084	Back Stutter	5.5457	Forward Stutter	5.78368	85	0.665919	0.255184	0.388003		0.00194787	0.000967052	0.00392583
2.8.0	3-2-1_522pg_Set 2 Amp 1_rep-952324	3	21068913	10467.4	38.7478	1.04905	398	276	143		48.672	33.9322	17.3958		3.64034	Back Stutter	6.30001	Forward Stutter	6.53543	85	0.567183	0.316996	0.300569		0.00167317	0.00167612	0.00308906
2.8.0	3-2-1_522pg_Set 2 Amp 1_rep-960932	3	18527240	10088.6	39.5486	1.03518	397	287	133		48.5635	35.1888	16.2477		3.62855	Back Stutter	5.75595	Forward Stutter	4.99841	85	0.580452	0.256977	0.333132		0.00172548	0.000981508	0.00347316
2.8.0	3-2-1_522pg_Set 2 Amp 2_rep-35262	3	10068914	14611.1	28.3212	1.17266	212	152	79		47.851	34.2988	17.8502		4.00021	Back Stutter	7.76072	Forward Stutter	7.32344	85	0.503452	0.275072	0.121677		0.00321018	0.0022364	0.00187729
2.8.0	3-2-1_522pg_Set 2 Amp 2_rep-104565	3	12136965	19855.2	27.6532	1.3033	210	145	78		48.5152	33.5879	17.8969		3.84086	Back Stutter	7.02001	Forward Stutter	5.63857	85	0.480317	0.26307	0.120785		0.00306076	0.00226831	0.00186208
2.8.0	3-2-1_522pg_Set 2 Amp 2_rep-562810	3	12255382	15107.9	28.6287	1.27514	218	154	77		48.5258	34.2591	17.215		3.82034	Back Stutter	5.95622	Forward Stutter	4.97464	85	0.562188	0.232487	0.10162		0.00364462	0.00180739	0.00153196
2.8.0	3-2-1_522pg_Set 2 Amp 2_rep-626603	3	9743897	9815.61	28.0601	1.17209	211	151	80		47.74	34.2031	18.0569		3.84767	Back Stutter	8.80347	Forward Stutter	6.07792	85	0.478188	0.298373	0.132959		0.00302864	0.00252602	0.00204155
2.8.0	3-2-1_522pg_Set 2 Amp 2_rep-655450	3	11445668	21007.6	27.9719	1.18227	217	146	80		48.9461	33.0644	17.9896		4.22391	Back Stutter	7.73325	Forward Stutter	5.2186	85	0.54825	0.231396	0.120389		0.00357319	0.0019314	0.00181028
2.8.0	3-2-1_522pg_Set 2 Amp 2_rep-803747	3	9658407	12791.6	27.8993	1.18573	213	151	78		48.2079	34.0989	17.6932		3.85425	Back Stutter	6.11456	Forward Stutter	6.65552	85	0.509112	0.295457	0.116136		0.00324623	0.00248465	0.00176369
2.8.0	3-2-1_522pg_Set 2 Amp 2_rep-874844	3	9452806	13321.9	28.6389	1.17164	223	154	81		48.7385	33.6075	17.6539		3.99351	Back Stutter	6.57824	Forward Stutter	5.36545	85	0.559083	0.276914	0.125348		0.00352323	0.00223791	0.00187339
2.8.0	3-2-1_522pg_Set 2 Amp 2_rep-887628	3	11476271	34335	28.322	1.26209	222	156	81		48.3738	34.0079	17.6183		4.07852	Back Stutter	7.19077	Forward Stutter	6.47537	85	0.552541	0.303424	0.118003		0.00346594	0.00252988	0.00175273
2.8.0	3-2-1_522pg_Set 2 Amp 2_rep-952324	3	13746463	12532.6	27.9139	1.10871	214	153	76		48.3157	34.574	17.1104		3.40084	Back Stutter	6.75482	Forward Stutter	6.94941	85	0.498725	0.268012	0.103397		0.00316518	0.00216538	0.00159668
2.8.0	3-2-1_522pg_Set 2 Amp 2_rep-960932	3	12399654	18332.8	28.3047	1.30268	220	152	80		48.5441	33.7522	17.7037		3.82805	Back Stutter	7.40424	Forward Stutter	5.21595	85	0.517307	0.280506	0.124769		0.00318477	0.00232118	0.0018503
2.8.0	10-5-1_1.2ng_Set 1 Amp 1_rep-28075	3	20201325	20842.5	50.9325	1.16312	625	423	127		53.166	35.975	10.859		4.37414	Back Stutter	3.09319	Forward Stutter	6.15728	85	0.828457	0.68799	0.271212		0.00155427	0.00197016	0.0027727
2.8.0	10-5-1_1.2ng_Set 1 Amp 1_rep-60279	3	31407943	15257.1	52.3793	1.25867	623	412	127		53.6512	35.4444	10.9044		4.0266	Back Stutter	3.28618	Forward Stutter	6.30179	85	0.767747	0.628003	0.261947		0.00142617	0.00182082	0.00266588
2.8.0	10-5-1_1.2ng_Set 1 Amp 1_rep-67655	3	26590114	12436.2	51.3497	1.15688	614	410	125		53.4205	35.6971	10.8824		3.86725	Back Stutter	3.18579	Forward Stutter	5.14683	85	0.65839	0.629951	0.251948		0.00120461	0.00183483	0.00257086
2.8.0	10-5-1_1.2ng_Set 1 Amp 1_rep-213976	3	27061104	17232.7	51.118	1.09385	625	419	126		53.4224	35.8436	10.7339		4.07429	Back Stutter	3.1819	Forward Stutter	4.60577	85	0.801532	0.625145	0.24837		0.00149411	0.0017773	0.00251559
2.8.0	10-5-1_1.2ng_Set 1 Amp 1_rep-216810	3	27132675	13998.6	50.5727	1.25344	621	412	123		53.6878	35.6338	10.6784		4.22783	Back Stutter	3.17163	Forward Stutter	6.28758	85	0.802541	0.637015	0.248689		0.00150648	0.0018519	0.0025774
2.8.0	10-5-1_1.2ng_Set 1 Amp 1_rep-723135	3	29308198	15784.5	49.8993	1.22454	631	417	125		53.7754	35.5455	10.6791		4.21421	Back Stutter	3.19156	Forward Stutter	7.10125	85	0.828363	0.633262	0.251485		0.00152351	0.00181288	0.00256416
2.8.0	10-5-1_1.2ng_Set 1 Amp 1_rep-848408	3	19443007	16500.6	51.7626	1.04091	611	404	123		53.7006	35.5095	10.7899		3.85425	Back Stutter	3.121	Forward Stutter	5.87204	85	0.694565	0.609804	0.239936		0.00129239	0.00179802	0.00247891
2.8.0	10-5-1_1.2ng_Set 1 Amp 1_rep-858042	3	26288452	20427.4	51.1362	1.12132	631	423	126		53.4492	35.8454	10.7053		3.86296	Back Stutter	3.14019	Forward Stutter	5.46407	85	0.732872	0.697178	0.254661		0.00131946	0.00199718	0.00257991
2.8.0	10-5-1_1.2ng_Set 1 Amp 1_rep-979142	3	31284227	12054.8	50.3995	1.21193	633	421	128		53.5567	35.5857	10.8576		4.38939	Back Stutter	3.18808	Forward Stutter	6.30006	85	0.939628	0.597959	0.269164		0.00178603	0.00169007	0.00271695
2.8.0	10-5-1_1.2ng_Set 1 Amp 1_rep-993333	3	20155921	16220.7	50.6082	1.05523	614	407	122		53.7216	35.6088	10.6695		3.73135	Back Stutter	3.13672	Forward Stutter	6.8385	85	0.700938	0.639279	0.237291		0.00129457	0.00188411	0.00246152
2.8.0	10-5-1_1.2ng_Set 1 Amp 2_rep-28075	3	20450069	15126.2	54.8823	1.10796	782	468	109		57.5471	34.4103	8.04259		3.93606	Back Stutter	2.85424	Forward Stutter	5.63079	85	0.828357	0.63273	0.207735		0.0011843	0.00157063	0.00237804
2.8.0	10-5-1_1.2ng_Set 1 Amp 2_rep-60279	3	29916428	23326.2	56.4126	1.21556	774	479	111		56.7988	35.0734	8.12771		4.26419	Back Stutter	2.85467	Forward Stutter	4.90404	85	0.852169	0.60005	0.209127		0.00127029	0.00145226	0.00235655
2.8.0	10-5-1_1.2ng_Set 1 Amp 2_rep-67655	3	16914143	16507.5	54.1325	1.18399	798	486	112		57.1499	34.8179	8.03212		4.4212	Back Stutter	2.82972	Forward Stutter	5.61641	85	0.859819	0.684945	0.216217		0.00121132	0.00165418	0.00241994
2.8.0	10-5-1_1.2ng_Set 1 Amp 2_rep-213976	3	20334930	12805.5	55.8779	1.07938	792	479	113		57.2357	34.5973	8.16705		3.97705	Back Stutter	2.82345	Forward Stutter	5.90463	85	0.762477	0.627751	0.215416		0.00106357	0.00151367	0.00239038
2.8.0	10-5-1_1.2ng_Set 1 Amp 2_rep-216810	3	16161739	24223.2	56.3845	1.18213	782	483	110		56.8331	35.1457	8.02123		4.54788	Back Stutter	2.8177	Forward Stutter	4.52135	85	0.793252	0.69139	0.206769		0.00113743	0.00168644	0.00234407
2.8.0	10-5-1_1.2ng_Set 1 Amp 2_rep-723135	3	19649693	11090.4	55.0468	1.14517	791	478	110		57.362	34.669	7.96894		4.28276	Back Stutter	2.77374	Forward Stutter	4.99833	85	0.858475	0.650914	0.205935		0.00122613	0.00159077	0.00232642
2.8.0	10-5-1_1.2ng_Set 1 Amp 2_rep-848408	3	18489068	11707.1	56.5217	1.06896	782	473	109		57.3349	34.6477	8.0174		4.10348	Back Stutter	2.79558	Forward Stutter	5.00233	85	0.822513	0.658188	0.205911		0.0011814	0.00163031	0.00235398
2.8.0	10-5-1_1.2ng_Set 1 Amp 2_rep-858042	3	19386022	17357.6	56.6246	1.15721	792	478	110		57.3885	34.6547	7.95678		3.99528	Back Stutter	2.79206	Forward Stutter	5.79093	85	0.80755	0.647872	0.199436		0.00114483	0.00158334	0.00225484
2.8.0	10-5-1_1.2ng_Set 1 Amp 2_rep-979142	3	26799208	15358.2	57.1754	1.22582	791	480	115		57.1085	34.6173	8.27414		3.99008	Back Stutter	2.74242	Forward Stutter	6.44261	85	0.771503	0.638539	0.226231		0.00108176	0.00154124	0.00250208
2.8.0	10-5-1_1.2ng_Set 1 Amp 2_rep-993333	3	19810218	12623	56.59	1.11743	796	475	117		57.3547	34.2458	8.39949		4.0566	Back Stutter	2.7669	Forward Stutter	5.4842	85	0.830201	0.632383	0.241391		0.00117155	0.00154673	0.00266289
2.8.0	10-5-1_1.4ng_Set 1 Amp 1_rep-28075	3	19408124	20617.2	47.7636	1.20229	607	348	117		56.6118	32.466	10.9222		3.50004	Back Stutter	5.89851	Forward Stutter	5.38438	85	0.920269	0.35225	0.338431		0.00181147	0.00113053	0.00428518
2.8.0	10-5-1_1.4ng_Set 1 Amp 1_rep-60279	3	17095640	15094.6	48.0587	1.28686	573	324	105		57.1458	32.3489	10.5052		3.14581	Back Stutter	5.09908	Forward Stutter	5.65836	85	0.767492	0.273937	0.28017		0.00156861	0.000928428	0.00378459
2.8.0	10-5-1_1.4ng_Set 1 Amp 1_rep-67655	3	19899564	13530.9	48.4172	1.31936	586	338	106		56.9003	32.7874	10.3123		3.16578	Back Stutter	4.94922	Forward Stutter	6.10926	85	0.777588	0.321534	0.27546		0.00154362	0.00105698	0.00363955
2.8.0	10-5-1_1.4ng_Set 1 Amp 1_rep-213976	3	15184027	13243.1	48.0373	1.49925	598	348	116		56.3126	32.7417	10.9457		3.83387	Back Stutter	5.15708	Forward Stutter	6.05734	85	0.870713	0.356343	0.336736		0.00172841	0.00114494	0.00431324
2.8.0	10-5-1_1.4ng_Set 1 Amp 1_rep-216810	3	20067667	11370.5	47.9883	1.08049	576	335	105		56.6916	32.9598	10.3486		3.27792	Back Stutter	6.08685	Forward Stutter	5.34785	85	0.728294	0.304199	0.274978		0.00145731	0.00100473	0.00368306
2.8.0	10-5-1_1.4ng_Set 1 Amp 1_rep-723135	3	22016860	14856.1	48.1974	1.22019	615	347	118		56.9432	32.134	10.9227		3.31134	Back Stutter	5.05842	Forward Stutter	5.20289	85	0.941884	0.327685	0.340423		0.0018365	0.00104566	0.0042979
2.8.0	10-5-1_1.4ng_Set 1 Amp 1_rep-848408	3	20326675	9655.18	48.7404	1.04024	616	349	115		57.0107	32.3408	10.6485		3.02694	Back Stutter	4.78482	Forward Stutter	5.7045	85	0.829707	0.320389	0.314389		0.00156696	0.00101248	0.00395309
2.8.0	10-5-1_1.4ng_Set 1 Amp 1_rep-858042	3	16595963	11219.5	47.9762	1.11063	580	333	113		56.5424	32.4225	11.035		3.0103	Back Stutter	4.90814	Forward Stutter	7.95063	85	0.729369	0.285149	0.31624		0.00145208	0.000942945	0.00408755
2.8.0	10-5-1_1.4ng_Set 1 Amp 1_rep-979142	3	17829428	15359	47.7685	1.04886	583	334	110		56.7437	32.5077	10.7487		3.03828	Back Stutter	5.0125	Forward Stutter	6.0608	85	0.709672	0.275029	0.298353		0.00139459	0.000897328	0.00388345
2.8.0	10-5-1_1.4ng_Set 1 Amp 1_rep-993333	3	19256508	9667.93	48.1687	1.18386	610	350	119		56.5517	32.4328	11.0155		3.47542	Back Stutter	4.83057	Forward Stutter	5.00686	85	0.924254	0.339444	0.343674		0.00180853	0.00106974	0.00429514
2.8.0	10-5-1_1.4ng_Set 1 Amp 2_rep-28075	3	28296143	16584	58.0928	1.09827	793	493	149		55.2485	34.3414	10.4101		3.56898	Back Stutter	4.07778	Forward Stutter	4.2761	85	0.772226	0.765997	0.255561		0.0010819	0.00186328	0.0020932
2.8.0	10-5-1_1.4ng_Set 1 Amp 2_rep-60279	3	31118645	10602.7	58.1722	1.20342	794	492	148		55.4058	34.2883	10.306		3.92874	Back Stutter	4.09521	Forward Stutter	4.93324	85	0.770973	0.743743	0.240458		0.0010791	0.001801	0.00196659
2.8.0	10-5-1_1.4ng_Set 1 Amp 2_rep-67655	3	25644654	12648.5	57.6325	1.11374	805	504	146		55.298	34.6433	10.0587		3.77035	Back Stutter	4.10159	Forward Stutter	5.39088	85	0.885145	0.854113	0.244341		0.00124563	0.00207084	0.00203288
2.8.0	10-5-1_1.4ng_Set 1 Amp 2_rep-213976	3	25495492	19418.5	58.0511	1.19355	815	513	153		55.033	34.6163	10.3507		4.08269	Back Stutter	4.1662	Forward Stutter	4.26968	85	0.8565	0.864782	0.272178		0.0011802	0.00205895	0.0021989
2.8.0	10-5-1_1.4ng_Set 1 Amp 2_rep-216810	3	31176813	15158.2	58.7139	1.61133	781	496	147		54.8498	34.8151	10.3351		4.6935	Back Stutter	4.18168	Forward Stutter	4.73646	85	0.730379	0.766879	0.236412		0.00103572	0.00185107	0.00192883
2.8.0	10-5-1_1.4ng_Set 1 Amp 2_rep-723135	3	32399810	8654.95	57.3163	1.16745	784	491	143		55.2892	34.5972	10.1136		3.92148	Back Stutter	3.97946	Forward Stutter	5.4596	85	0.733645	0.744529	0.219066		0.00103649	0.00180825	0.00182017
2.8.0	10-5-1_1.4ng_Set 1 Amp 2_rep-848408	3	27087739	17599	58.5202	1.03264	805	513	150		54.8438	34.9578	10.1985		3.93406	Back Stutter	4.03836	Forward Stutter	5.42651	85	0.72897	0.823276	0.241335		0.00100053	0.00193741	0.00194966
2.8.0	10-5-1_1.4ng_Set 1 Amp 2_rep-858042	3	23664782	17329	58.2993	1.04352	780	487	144		55.2925	34.4929	10.2146		3.85419	Back Stutter	3.99847	Forward Stutter	5.13713	85	0.725405	0.750132	0.233051		0.00102885	0.00184118	0.00195722
2.8.0	10-5-1_1.4ng_Set 1 Amp 2_rep-979142	3	29394008	12408.8	57.5114	1.23973	811	510	144		55.3546	34.8284	9.81706		4.35235	Back Stutter	4.07675	Forward Stutter	6.21746	85	0.908427	0.853031	0.217022		0.00126946	0.0020351	0.00179347
2.8.0	10-5-1_1.4ng_Set 1 Amp 2_rep-993333	3	23890579	14009.8	57.7837	1.10168	801	497	144		55.55	34.4348	10.0152		3.44164	Back Stutter	4.28828	Forward Stutter	4.68965	85	0.822292	0.784182	0.221846		0.00115126	0.00189843	0.001829
2.8.0	10-5-1_1.6ng_Set 1 Amp 1_rep-28075	3	28700180	12516.6	62.1797	1.01542	1185	638	169		59.4512	32.0426	8.50626		4.05723	Back Stutter	4.89063	Forward Stutter	5.81508	85	1.26194	0.671587	0.344763		0.00119884	0.00118136	0.00261166
2.8.0	10-5-1_1.6ng_Set 1 Amp 1_rep-60279	3	34580720	16723.7	60.5713	1.18718	1221	659	173		59.4919	32.0888	8.41931		4.11775	Back Stutter	4.82951	Forward Stutter	7.9917	85	1.43498	0.755178	0.359308		0.00133925	0.00130073	0.00268933
2.8.0	10-5-1_1.6ng_Set 1 Amp 1_rep-67655	3	28488110	15567.8	62.4173	1.09003	1250	670	177		59.604	31.9545	8.4415		3.88206	Back Stutter	4.60807	Forward Stutter	7.23401	85	1.59547	0.815486	0.37679		0.00147243	0.00139482	0.00277156
2.8.0	10-5-1_1.6ng_Set 1 Amp 1_rep-213976	3	24599134	10279.8	60.6712	1.0809	1214	649	175		59.563	31.863	8.57394		3.80085	Back Stutter	4.99989	Forward Stutter	7.20567	85	1.56605	0.782269	0.38365		0.00149265	0.00138109	0.00289047
2.8.0	10-5-1_1.6ng_Set 1 Amp 1_rep-216810	3	24574296	27286.5	61.6086	1.10542	1219	659	171		59.4933	32.1589	8.34775		4.42627	Back Stutter	4.92317	Forward Stutter	5.51168	85	1.34431	0.728457	0.343688		0.00124433	0.00124894	0.00257
2.8.0	10-5-1_1.6ng_Set 1 Amp 1_rep-723135	3	28922348	15939.8	61.9852	1.2144	1205	652	171		59.4209	32.1643	8.41474		4.35942	Back Stutter	4.74153	Forward Stutter	7.63213	85	1.32945	0.716962	0.35181		0.00124613	0.00124135	0.00265071
2.8.0	10-5-1_1.6ng_Set 1 Amp 1_rep-848408	3	27032754	10170.3	62.5884	1.10261	1195	651	168		59.3399	32.3079	8.35219		4.1152	Back Stutter	4.8555	Forward Stutter	7.59801	85	1.26952	0.714008	0.331818		0.00119356	0.00123869	0.00250825
2.8.0	10-5-1_1.6ng_Set 1 Amp 1_rep-858042	3	25648321	28149.7	61.353	1.13105	1232	662	173		59.5898	32.0201	8.39015		4.199	Back Stutter	4.73225	Forward Stutter	7.64369	85	1.46405	0.75817	0.362253		0.00135565	0.00129964	0.00269539
2.8.0	10-5-1_1.6ng_Set 1 Amp 1_rep-979142	3	37347292	8940.08	64.4179	1.06593	1219	652	172		59.6579	31.9233	8.4188		3.74115	Back Stutter	4.67257	Forward Stutter	8.34388	85	1.34082	0.657423	0.336417		0.00124276	0.00112613	0.0024818
2.8.0	10-5-1_1.6ng_Set 1 Amp 1_rep-993333	3	23997180	11166.8	62.7283	1.04671	1240	668	177		59.4841	32.0438	8.47208		3.86975	Back Stutter	4.43279	Forward Stutter	9.57135	85	1.42502	0.741882	0.36859		0.00130221	0.00125307	0.00269337
2.8.0	10-5-1_1.6ng_Set 1 Amp 2_rep-28075	3	30781306	18056.3	56.3142	1.34003	942	636	115		55.6451	37.5907	6.76417		4.23745	Back Stutter	3.67109	Forward Stutter	5.52823	85	1.35595	1.16832	0.158943		0.00169965	0.00228956	0.00162293
2.8.0	10-5-1_1.6ng_Set 1 Amp 2_rep-60279	3	28858593	12926.6	56.4351	1.57407	951	639	113		55.8515	37.4943	6.65416		4.36087	Back Stutter	3.60381	Forward Stutter	5.2202	85	1.38778	1.14232	0.14072		0.00172826	0.0022092	0.00142787
2.8.0	10-5-1_1.6ng_Set 1 Amp 2_rep-67655	3	25837982	12843.3	55.3724	1.26813	964	650	113		55.8034	37.6354	6.56125		4.29664	Back Stutter	3.5673	Forward Stutter	5.3491	85	1.41888	1.17967	0.135714		0.00173905	0.00225476	0.00137128
2.8.0	10-5-1_1.6ng_Set 1 Amp 2_rep-213976	3	22163958	8587.18	55.5974	1.12178	952	636	111		56.023	37.4263	6.55066		4.18346	Back Stutter	3.55683	Forward Stutter	3.46064	85	1.35052	1.15649	0.129359		0.0016687	0.0022586	0.00132257
2.8.0	10-5-1_1.6ng_Set 1 Amp 2_rep-216810	3	25535683	11923.8	58.1496	1.28507	968	647	113		56.0093	37.4268	6.56385		4.27609	Back Stutter	3.52408	Forward Stutter	6.09236	85	1.50253	1.1645	0.136038		0.0018649	0.00222653	0.00137654
2.8.0	10-5-1_1.6ng_Set 1 Amp 2_rep-723135	3	29264845	9089.77	57.2478	1.04588	975	644	114		56.2472	37.1828	6.56998		3.51605	Back Stutter	3.70651	Forward Stutter	3.85456	85	1.38636	1.17999	0.127444		0.00167631	0.00228377	0.00126922
2.8.0	10-5-1_1.6ng_Set 1 Amp 2_rep-848408	3	24960363	15181.9	56.6844	1.14118	949	628	114		56.1125	37.1312	6.75628		4.18	Back Stutter	3.66445	Forward Stutter	4.8376	85	1.49819	1.15285	0.15984		0.00189012	0.00229093	0.00164485
2.8.0	10-5-1_1.6ng_Set 1 Amp 2_rep-858042	3	20672416	8232.32	56.9223	1.0864	922	629	113		55.3984	37.779	6.8226		3.99536	Back Stutter	3.4484	Forward Stutter	5.72347	85	1.22058	1.15519	0.146245		0.00153835	0.00228769	0.00149141
2.8.0	10-5-1_1.6ng_Set 1 Amp 2_rep-979142	3	24033088	7713.49	56.1056	1.19395	964	649	113		55.842	37.5998	6.55816		4.46098	Back Stutter	3.86277	Forward Stutter	6.16251	85	1.43503	1.20376	0.138077		0.00177377	0.00231914	0.00140173
2.8.0	10-5-1_1.6ng_Set 1 Amp 2_rep-993333	3	34667575	9077.34	57.3658	1.37166	966	657	115		55.6065	37.7584	6.63503		4.58747	Back Stutter	3.52188	Forward Stutter	4.20007	85	1.44135	1.24361	0.153979		0.00176871	0.00236185	0.0015462
2.8.0	10-5-1_3.2ng_Set 1 Amp 1_rep-28075	3	26372643	10451.5	67.7359	1.06834	1658	922	203		59.5788	33.1134	7.30779		3.65281	Back Stutter	8.99434	Forward Stutter	5.69638	85	2.28212	1.50447	0.212931		0.00161024	0.00197353	0.00117512
2.8.0	10-5-1_3.2ng_Set 1 Amp 1_rep-60279	3	21011428	18314.6	69.5317	1.17236	1666	917	203		59.8115	32.9148	7.2737		3.44761	Back Stutter	9.36115	Forward Stutter	5.77659	85	2.44812	1.49489	0.21648		0.00174418	0.00197831	0.00120524
2.8.0	10-5-1_3.2ng_Set 1 Amp 1_rep-67655	3	23138065	12907	69.2419	1.04601	1655	905	203		59.9065	32.7471	7.34636		3.12951	Back Stutter	8.90727	Forward Stutter	5.14989	85	2.33711	1.41388	0.202848		0.00165493	0.00186774	0.00111156
2.8.0	10-5-1_3.2ng_Set 1 Amp 1_rep-213976	3	21953948	9205.57	67.6919	1.07821	1679	916	200		60.0553	32.7722	7.17256		3.63106	Back Stutter	8.84091	Forward Stutter	5.294	85	2.58419	1.53103	0.214762		0.00184133	0.00203255	0.001205
2.8.0	10-5-1_3.2ng_Set 1 Amp 1_rep-216810	3	28823646	11446.6	68.8978	1.09506	1689	930	204		59.8329	32.9448	7.22225		3.20693	Back Stutter	9.15516	Forward Stutter	6.15174	85	2.37949	1.49743	0.190683		0.00166046	0.0019489	0.00103934
2.8.0	10-5-1_3.2ng_Set 1 Amp 1_rep-723135	3	24405447	11731.3	68.2185	1.15868	1663	910	202		59.9493	32.7866	7.26406		3.64004	Back Stutter	9.1881	Forward Stutter	4.7979	85	2.51671	1.50296	0.220819		0.00180376	0.00200418	0.00123826
2.8.0	10-5-1_3.2ng_Set 1 Amp 1_rep-848408	3	22074775	14866.7	67.4077	1.09178	1668	928	205		59.5491	33.1185	7.33239		3.53343	Back Stutter	9.53731	Forward Stutter	4.70769	85	2.29867	1.53956	0.213421		0.00161355	0.0020223	0.00116662
2.8.0	10-5-1_3.2ng_Set 1 Amp 1_rep-858042	3	27049501	17268.1	69.5013	1.11949	1686	925	204		59.8867	32.8622	7.25113		3.10255	Back Stutter	8.7209	Forward Stutter	5.9928	85	2.4577	1.53777	0.206845		0.00172622	0.00202231	0.0011335
2.8.0	10-5-1_3.2ng_Set 1 Amp 1_rep-979142	3	27454932	11021.5	69.849	1.16755	1689	932	204		59.7934	32.9753	7.23123		3.52464	Back Stutter	9.12976	Forward Stutter	4.88391	85	2.45625	1.55102	0.210881		0.00171817	0.00202481	0.00115434
2.8.0	10-5-1_3.2ng_Set 1 Amp 1_rep-993333	3	23148534	10354.6	68.8581	1.02723	1699	945	208		59.564	33.1439	7.29214		3.21939	Back Stutter	8.76284	Forward Stutter	8.2201	85	2.53436	1.68198	0.236756		0.00177602	0.00220684	0.0012955
2.8.0	10-5-1_3.2ng_Set 1 Amp 2_rep-28075	3	24925756	11028.9	70.0433	1.27879	2042	1147	262		59.1052	33.2977	7.59712		6.23531	Back Stutter	8.87536	Forward Stutter	5.38392	85	3.03557	1.19875	0.467831		0.00176725	0.00117637	0.00220896
2.8.0	10-5-1_3.2ng_Set 1 Amp 2_rep-60279	3	22392684	13293.2	71.006	1.9142	1966	1128	259		58.6393	33.638	7.72272		6.17729	Back Stutter	8.91714	Forward Stutter	6.93102	85	2.61147	1.2747	0.479246		0.0015432	0.00128468	0.00232138
2.8.0	10-5-1_3.2ng_Set 1 Amp 2_rep-67655	3	16597251	28789.7	68.8144	1.19747	1992	1132	257		58.9103	33.488	7.60175		6.15428	Back Stutter	8.98561	Forward Stutter	5.35382	85	2.85364	1.32198	0.467784		0.00169604	0.0013388	0.00226737
2.8.0	10-5-1_3.2ng_Set 1 Amp 2_rep-213976	3	24289015	16398.8	69.0242	1.04348	1957	1120	267		58.5276	33.5027	7.96979		5.32772	Back Stutter	8.88601	Forward Stutter	4.69684	85	2.49911	1.16173	0.486093		0.00146844	0.00115736	0.00225637
2.8.0	10-5-1_3.2ng_Set 1 Amp 2_rep-216810	3	23591860	13332.9	69.8318	1.17653	1999	1137	268		58.7211	33.4108	7.86812		5.83932	Back Stutter	8.85376	Forward Stutter	3.95808	85	2.71766	1.24816	0.512795		0.00158571	0.00123868	0.0024057
2.8.0	10-5-1_3.2ng_Set 1 Amp 2_rep-723135	3	23822383	18802.2	68.9447	1.13722	1996	1134	269		58.7193	33.3812	7.89948		5.10944	Back Stutter	8.8838	Forward Stutter	4.7036	85	2.78119	1.27305	0.490421		0.00163794	0.00127709	0.00227032
2.8.0	10-5-1_3.2ng_Set 1 Amp 2_rep-848408	3	20962586	13904.5	69.4827	1.12515	2008	1136	274		58.7437	33.2352	8.02105		5.29463	Back Stutter	9.05506	Forward Stutter	5.22588	85	2.91434	1.29799	0.541045		0.00172032	0.00130065	0.00250419
2.8.0	10-5-1_3.2ng_Set 1 Amp 2_rep-858042	3	20356178	15706.7	70.7469	1.19321	1938	1111	273		58.3594	33.4362	8.2044		5.30491	Back Stutter	8.78042	Forward Stutter	4.35331	85	2.48183	1.15962	0.519384		0.00147934	0.00116904	0.00239084
2.8.0	10-5-1_3.2ng_Set 1 Amp 2_rep-979142	3	19330081	11567.3	70.1336	1.0958	1994	1126	267		58.8889	33.2406	7.87052		5.28097	Back Stutter	9.04454	Forward Stutter	5.60655	85	2.74323	1.1551	0.471003		0.00160946	0.00115037	0.00217116
2.8.0	10-5-1_3.2ng_Set 1 Amp 2_rep-993333	3	20029641	8978.92	70.0967	1.06005	1973	1114	265		58.8607	33.2245	7.91487		5.43175	Back Stutter	8.84049	Forward Stutter	4.58158	85	2.7697	1.16947	0.487804		0.00165247	0.00118148	0.00229566
2.8.0	10-5-1_100pg_Set 1 Amp 1_rep-28075	3	3435986	6341.47	4.32828	1.07957	58	38	22		49.4655	32.0171	18.5173		2.76912	Back Stutter	8.12086	Forward Stutter	5.81015	90	0.152111	0.105942	0.0540938		0.00379285	0.00420528	0.00355824
2.8.0	10-5-1_100pg_Set 1 Amp 1_rep-60279	3	3147831	5195.32	4.66211	1.10108	56	35	21		49.605	31.4769	18.918		2.82015	Back Stutter	7.83725	Forward Stutter	6.66638	90	0.157125	0.0913085	0.0492971		0.00423317	0.00378967	0.00343142
2.8.0	10-5-1_100pg_Set 1 Amp 1_rep-67655	3	4018686	9854.51	4.51421	1.20485	57	38	23		48.7833	32.0289	19.1878		2.74098	Back Stutter	12.3871	Forward Stutter	7.24437	90	0.167721	0.0954436	0.0588094		0.00442644	0.0035724	0.00378619
2.8.0	10-5-1_100pg_Set 1 Amp 1_rep-213976	3	4170882	7865.86	4.55915	1.18822	58	38	23		48.8699	31.8856	19.2445		2.90627	Back Stutter	7.69656	Forward Stutter	6.08351	90	0.167255	0.103682	0.0536604		0.00440484	0.00410496	0.00324551
2.8.0	10-5-1_100pg_Set 1 Amp 1_rep-216810	3	3440440	30634.9	4.46459	1.04975	58	38	22		49.3357	31.8834	18.7809		2.76178	Back Stutter	8.60111	Forward Stutter	7.56062	90	0.171392	0.0841451	0.0579401		0.00452387	0.00306639	0.00392938
2.8.0	10-5-1_100pg_Set 1 Amp 1_rep-723135	3	3780045	10209	4.7456	1.06188	57	38	22		48.6295	32.4007	18.9698		2.88069	Back Stutter	8.25746	Forward Stutter	7.97149	90	0.150222	0.101333	0.0618564		0.00379184	0.00395341	0.00426247
2.8.0	10-5-1_100pg_Set 1 Amp 1_rep-848408	3	3472611	11688.4	4.41406	1.02989	56	37	23		48.3177	32.117	19.5653		2.73823	Back Stutter	8.19169	Forward Stutter	6.95906	90	0.152852	0.104892	0.0565341		0.00399507	0.00422078	0.00371341
2.8.0	10-5-1_100pg_Set 1 Amp 1_rep-858042	3	3622557	11337.7	4.79829	1.03756	57	37	23		48.9518	31.8083	19.2399		2.69151	Back Stutter	7.82888	Forward Stutter	6.93576	90	0.168584	0.0790415	0.0600819		0.00449676	0.0028672	0.0039772
2.8.0	10-5-1_100pg_Set 1 Amp 1_rep-979142	3	3336882	8739.09	3.58445	1.10975	58	38	23		48.8683	31.8718	19.2599		2.82776	Back Stutter	8.33676	Forward Stutter	6.87533	90	0.174046	0.0902761	0.0603721		0.0046894	0.00330285	0.00387716
2.8.0	10-5-1_100pg_Set 1 Amp 1_rep-993333	3	3393534	6687.5	5.48474	1.06514	57	37	22		49.1418	32.0646	18.7937		2.74767	Back Stutter	10.2962	Forward Stutter	5.53167	90	0.177162	0.0815557	0.0630534		0.00484243	0.0029356	0.00461246
2.8.0	10-5-1_100pg_Set 1 Amp 2_rep-28075	3	3206962	16759.1	7.15739	1.41588	54	39	27		45.1715	32.3458	22.4827		2.97428	Back Stutter	9.33288	Forward Stutter	6.67811	90	0.153148	0.0640202	0.0463396		0.00421242	0.00205584	0.00214623
2.8.0	10-5-1_100pg_Set 1 Amp 2_rep-60279	3	3199431	7417.95	7.85946	1.18297	55	40	29		44.3393	32.5624	23.0983		2.90694	Back Stutter	9.56425	Forward Stutter	5.20603	90	0.12148	0.0604634	0.0519181		0.00300186	0.00180679	0.00228207
2.8.0	10-5-1_100pg_Set 1 Amp 2_rep-67655	3	3495175	10075.3	7.84444	1.0198	54	40	28		44.4306	32.9078	22.6615		2.75508	Back Stutter	10.0933	Forward Stutter	5.19587	90	0.0955865	0.0541694	0.0532249		0.00224473	0.00160158	0.00270422
2.8.0	10-5-1_100pg_Set 1 Amp 2_rep-213976	3	3358864	8502.7	8.44094	1.14949	54	40	28		44.253	32.5884	23.1586		2.53425	Back Stutter	8.61617	Forward Stutter	5.89286	90	0.116576	0.0557209	0.0497304		0.00285917	0.0016719	0.00223618
2.8.0	10-5-1_100pg_Set 1 Amp 2_rep-216810	3	3292540	14362.4	7.77691	1.10067	53	40	29		43.4271	32.6804	23.8925		2.6037	Back Stutter	10.9137	Forward Stutter	6.35988	90	0.104869	0.0678264	0.0406336		0.00254864	0.00219405	0.00165223
2.8.0	10-5-1_100pg_Set 1 Amp 2_rep-723135	3	2883817	9745.55	7.726	1.07132	57	42	30		44.434	32.2327	23.3333		2.80688	Back Stutter	10.0107	Forward Stutter	4.91382	90	0.155684	0.0750093	0.046073		0.00406394	0.00230906	0.0018927
2.8.0	10-5-1_100pg_Set 1 Amp 2_rep-848408	3	3430501	17215.2	9.73662	1.07414	54	41	29		43.8903	32.9897	23.12		2.69144	Back Stutter	9.66538	Forward Stutter	5.31304	90	0.104113	0.0590986	0.0475463		0.00243473	0.0017407	0.00206379
2.8.0	10-5-1_100pg_Set 1 Amp 2_rep-858042	3	3276791	8106.21	7.96564	1.03621	57	43	30		44.2179	32.8216	22.9605		2.76072	Back Stutter	10.1936	Forward Stutter	7.31291	90	0.127957	0.0655147	0.0584206		0.0029766	0.00188685	0.0027477
2.8.0	10-5-1_100pg_Set 1 Amp 2_rep-979142	3	3193660	3145.01	8.19415	1.1845	55	40	29		44.2666	32.5168	23.2166		2.65889	Back Stutter	7.77718	Forward Stutter	7.33963	90	0.128252	0.0650704	0.0376764		0.0032196	0.00197204	0.00155624
2.8.0	10-5-1_100pg_Set 1 Amp 2_rep-993333	3	3329625	11770.7	8.31621	1.08027	57	42	30		44.4871	32.5217	22.9912		2.66408	Back Stutter	7.7879	Forward Stutter	5.98017	90	0.128225	0.0671541	0.0467885		0.00303057	0.00195908	0.00198863
2.8.0	10-5-1_200pg_Set 1 Amp 1_rep-28075	3	4610487	24074.8	11.4547	1.06294	64	48	27		46.2234	34.3331	19.4435		2.47141	Back Stutter	7.28429	Forward Stutter	5.28811	89	0.128771	0.0698509	0.0521745		0.00257335	0.00176568	0.00257351
2.8.0	10-5-1_200pg_Set 1 Amp 1_rep-60279	3	4796150	11710.8	11.9538	1.08893	67	49	27		46.7892	34.1347	19.0761		2.5032	Back Stutter	10.7567	Forward Stutter	6.33918	89	0.149608	0.0642503	0.0555636		0.00297556	0.00152884	0.00273905
2.8.0	10-5-1_200pg_Set 1 Amp 1_rep-67655	3	5101954	11193.2	10.8106	1.07186	64	47	29		45.635	33.8509	20.5141		2.66493	Back Stutter	10.2755	Forward Stutter	6.46428	89	0.128874	0.070626	0.0494851		0.00260174	0.00178524	0.00229083
2.8.0	10-5-1_200pg_Set 1 Amp 1_rep-213976	3	4849311	16033.3	11.9814	1.09021	65	48	27		46.4684	34.282	19.2496		2.54521	Back Stutter	9.25747	Forward Stutter	6.97916	89	0.133039	0.0608038	0.0595835		0.00265097	0.00147144	0.00315473
2.8.0	10-5-1_200pg_Set 1 Amp 1_rep-216810	3	4813114	18460	11.369	1.02999	63	46	26		46.3575	34.3952	19.2473		2.43209	Back Stutter	8.06389	Forward Stutter	5.37305	89	0.12263	0.064563	0.0449412		0.00249943	0.00164551	0.00243902
2.8.0	10-5-1_200pg_Set 1 Amp 1_rep-723135	3	5056158	10458.4	11.6063	1.07306	66	49	28		46.1124	34.4122	19.4755		2.46401	Back Stutter	8.90126	Forward Stutter	7.09533	89	0.141771	0.0714768	0.058132		0.0028182	0.00175407	0.00295508
2.8.0	10-5-1_200pg_Set 1 Amp 1_rep-848408	3	5241819	9671.33	11.6191	1.24695	64	47	27		46.292	34.4438	19.2642		2.75115	Back Stutter	8.58918	Forward Stutter	6.80442	89	0.140736	0.0670968	0.0588173		0.00298261	0.00169669	0.00308382
2.8.0	10-5-1_200pg_Set 1 Amp 1_rep-858042	3	4369752	9811.98	13.1829	1.10404	65	48	27		46.4582	34.4575	19.0842		2.5071	Back Stutter	9.17809	Forward Stutter	7.51252	89	0.140247	0.071942	0.0584652		0.00287249	0.00182159	0.00313693
2.8.0	10-5-1_200pg_Set 1 Amp 1_rep-979142	3	4342506	8342.88	11.2832	1.18498	66	48	26		46.9385	34.3543	18.7072		2.59702	Back Stutter	7.65969	Forward Stutter	6.65235	89	0.145967	0.0666434	0.0651975		0.00297243	0.00165144	0.00373978
2.8.0	10-5-1_200pg_Set 1 Amp 1_rep-993333	3	5159179	25537	11.6964	1.04093	66	49	29		45.9751	34.1207	19.9042		2.62855	Back Stutter	10.8346	Forward Stutter	5.42275	89	0.139763	0.0773872	0.0483347		0.00277904	0.0019685	0.00244952
2.8.0	10-5-1_200pg_Set 1 Amp 2_rep-28075	3	11286721	11817.3	21.2934	1.0846	144	105	41		49.7314	36.1864	14.0822		2.77662	Back Stutter	8.75115	Forward Stutter	6.50373	85	0.37832	0.167493	0.0818545		0.00373704	0.00192593	0.00266127
2.8.0	10-5-1_200pg_Set 1 Amp 2_rep-60279	3	10977519	18199.8	21.1366	1.10356	140	102	40		49.578	36.2095	14.2126		2.759	Back Stutter	6.58998	Forward Stutter	6.16097	85	0.353135	0.168424	0.0782021		0.00350784	0.00203351	0.00254653
2.8.0	10-5-1_200pg_Set 1 Amp 2_rep-67655	3	10577772	12310.4	23.2872	1.11181	135	102	37		49.3112	37.1476	13.5411		2.5966	Back Stutter	8.33403	Forward Stutter	6.33484	85	0.316994	0.150818	0.067968		0.00319515	0.00178509	0.00232817
2.8.0	10-5-1_200pg_Set 1 Amp 2_rep-213976	3	10709150	13248.2	23.811	1.1458	139	103	38		49.4643	36.8278	13.7079		2.68034	Back Stutter	7.17447	Forward Stutter	6.55776	85	0.330954	0.147678	0.0809967		0.00324426	0.00169134	0.00286288
2.8.0	10-5-1_200pg_Set 1 Amp 2_rep-216810	3	10903722	15058.4	22.7148	1.12964	142	105	43		48.8698	36.2197	14.9106		2.90809	Back Stutter	7.03146	Forward Stutter	8.19018	85	0.341062	0.166272	0.11119		0.00329876	0.00191017	0.00370589
2.8.0	10-5-1_200pg_Set 1 Amp 2_rep-723135	3	10872523	10627	22.346	1.04468	141	105	42		48.8989	36.513	14.5881		2.94604	Back Stutter	7.10846	Forward Stutter	6.16738	85	0.361297	0.169182	0.0948812		0.00361389	0.00195319	0.00319882
2.8.0	10-5-1_200pg_Set 1 Amp 2_rep-848408	3	10430522	13995.5	22.703	1.09446	138	104	41		48.7769	36.676	14.5472		2.84137	Back Stutter	11.4546	Forward Stutter	8.17964	85	0.32878	0.157108	0.0976003		0.00324358	0.00182352	0.00334322
2.8.0	10-5-1_200pg_Set 1 Amp 2_rep-858042	3	11178170	12525	22.8314	1.12708	138	104	41		48.7243	36.6492	14.6264		2.85486	Back Stutter	9.10841	Forward Stutter	6.20318	85	0.323945	0.170478	0.0896294		0.00323976	0.00204933	0.00288688
2.8.0	10-5-1_200pg_Set 1 Amp 2_rep-979142	3	9340052	8214.04	23.705	1.03989	140	103	38		49.8584	36.6516	13.49		2.67573	Back Stutter	7.90772	Forward Stutter	4.71838	85	0.371352	0.161187	0.0832069		0.00380477	0.00188737	0.0029538
2.8.0	10-5-1_200pg_Set 1 Amp 2_rep-993333	3	10183706	6654.61	23.8449	1.14407	137	104	42		48.456	36.6206	14.9234		3.16234	Back Stutter	6.48915	Forward Stutter	8.84706	85	0.320412	0.180175	0.0860976		0.00317942	0.00220963	0.0027624
2.8.0	10-5-1_400pg_Set 1 Amp 1_rep-28075	3	10770402	7845.59	24.6739	1.0846	186	109	45		54.6398	32.0796	13.2806		3.58621	Back Stutter	6.86781	Forward Stutter	6.8172	85	0.268625	0.159277	0.112452		0.00171397	0.00191955	0.00390682
2.8.0	10-5-1_400pg_Set 1 Amp 1_rep-60279	3	11807342	9401.83	25.2456	1.10477	176	105	38		55.081	32.8933	12.0257		3.19585	Back Stutter	8.02933	Forward Stutter	6.28192	85	0.21555	0.128351	0.125989		0.00141067	0.00140545	0.00545992
2.8.0	10-5-1_400pg_Set 1 Amp 1_rep-67655	3	10295935	7624.74	24.326	1.08905	177	105	39		55.2719	32.6261	12.102		3.08711	Back Stutter	6.62154	Forward Stutter	5.64319	85	0.222602	0.113458	0.12488		0.00149296	0.00122239	0.00535757
2.8.0	10-5-1_400pg_Set 1 Amp 1_rep-213976	3	12630968	7896.7	25.0638	1.24933	185	110	40		55.1545	32.8323	12.0133		3.69744	Back Stutter	8.4523	Forward Stutter	7.19778	85	0.251543	0.109245	0.11732		0.00161294	0.00110501	0.00449924
2.8.0	10-5-1_400pg_Set 1 Amp 1_rep-216810	3	10503909	10205.5	25.6894	1.10963	187	108	39		55.987	32.2685	11.7445		3.16572	Back Stutter	6.33315	Forward Stutter	7.34913	85	0.264407	0.119137	0.123387		0.00167237	0.00125433	0.00516779
2.8.0	10-5-1_400pg_Set 1 Amp 1_rep-723135	3	9342817	15502.9	25.3502	1.05951	184	107	40		55.4691	32.3929	12.138		3.33082	Back Stutter	7.18882	Forward Stutter	5.67569	85	0.250906	0.108444	0.123747		0.00162299	0.00113183	0.00492843
2.8.0	10-5-1_400pg_Set 1 Amp 1_rep-848408	3	12948124	13859.9	24.387	1.22297	180	105	42		55.0108	32.1813	12.8079		3.54769	Back Stutter	8.31369	Forward Stutter	7.74008	85	0.286627	0.112725	0.127915		0.00195208	0.00120422	0.0050414
2.8.0	10-5-1_400pg_Set 1 Amp 1_rep-858042	3	12561555	15259.6	24.7753	1.19136	184	110	41		55.1339	32.7117	12.1544		3.46286	Back Stutter	7.68341	Forward Stutter	6.79483	85	0.239594	0.118778	0.120994		0.0015192	0.00122304	0.00467606
2.8.0	10-5-1_400pg_Set 1 Amp 1_rep-979142	3	9989371	11080.5	26.3445	1.27462	175	107	40		54.4303	33.1506	12.4191		4.38486	Back Stutter	8.3492	Forward Stutter	6.23987	85	0.245652	0.109483	0.11653		0.00165399	0.00114496	0.00458017
2.8.0	10-5-1_400pg_Set 1 Amp 1_rep-993333	3	10515521	8953.4	27.3762	1.21166	184	109	41		55.2397	32.5458	12.2145		3.6234	Back Stutter	8.33787	Forward Stutter	6.94442	85	0.225838	0.117362	0.137003		0.00141752	0.00121757	0.00580348
2.8.0	10-5-1_400pg_Set 1 Amp 2_rep-28075	3	8046861	9880.65	23.2636	1.04187	169	118	31		53.0284	37.2064	9.76519		2.83613	Back Stutter	9.46782	Forward Stutter	6.86125	90	0.364375	0.152815	0.0850727		0.00281819	0.00151065	0.00405602
2.8.0	10-5-1_400pg_Set 1 Amp 2_rep-60279	3	8836579	25405.6	21.7687	1.03668	157	115	32		51.6532	37.9308	10.416		2.94455	Back Stutter	7.57065	Forward Stutter	5.38977	90	0.282736	0.14099	0.0959309		0.00224681	0.0014104	0.00474273
2.8.0	10-5-1_400pg_Set 1 Amp 2_rep-67655	3	10462960	11564.1	22.5183	1.21184	166	118	33		52.4655	37.2131	10.3213		3.22966	Back Stutter	7.46929	Forward Stutter	5.60095	90	0.341261	0.144756	0.100953		0.00264384	0.00141521	0.004778
2.8.0	10-5-1_400pg_Set 1 Amp 2_rep-213976	3	9469614	21349.7	22.0657	1.1548	162	116	33		51.9959	37.2333	10.7708		3.41759	Back Stutter	11.2962	Forward Stutter	7.65064	90	0.325404	0.146221	0.105606		0.00256284	0.00145325	0.00502534
2.8.0	10-5-1_400pg_Set 1 Amp 2_rep-216810	3	8250620	9509.02	21.6191	1.08808	159	116	33		51.5148	37.7733	10.7119		3.12493	Back Stutter	8.63411	Forward Stutter	7.14228	90	0.303164	0.157885	0.10555		0.00240052	0.00157861	0.00515505
2.8.0	10-5-1_400pg_Set 1 Amp 2_rep-723135	3	9634507	11992.3	22.5533	1.06603	163	116	32		52.2857	37.3009	10.4135		2.71004	Back Stutter	8.94921	Forward Stutter	5.2697	90	0.336902	0.144534	0.102629		0.00268297	0.00143405	0.0050706
2.8.0	10-5-1_400pg_Set 1 Amp 2_rep-848408	3	9164240	18882.9	21.5399	1.08971	156	115	31		51.6127	38.104	10.2833		2.95802	Back Stutter	7.58151	Forward Stutter	5.98854	90	0.261978	0.135306	0.0910367		0.00204076	0.00134133	0.00442631
2.8.0	10-5-1_400pg_Set 1 Amp 2_rep-858042	3	9519651	12730.1	22.5884	1.01941	166	121	34		51.8895	37.6339	10.4767		2.99142	Back Stutter	6.61547	Forward Stutter	7.88437	90	0.328639	0.151648	0.10514		0.00251038	0.00144752	0.00489792
2.8.0	10-5-1_400pg_Set 1 Amp 2_rep-979142	3	8630959	11219.2	21.4542	1.14576	163	116	34		52.1047	37.1625	10.7328		2.99614	Back Stutter	8.03353	Forward Stutter	6.97886	90	0.327938	0.175902	0.0865925		0.0025843	0.00189897	0.00392683
2.8.0	10-5-1_400pg_Set 1 Amp 2_rep-993333	3	9335050	12129.9	21.2262	1.03855	163	116	33		52.2436	37.1595	10.5968		2.9696	Back Stutter	7.02789	Forward Stutter	8.97419	90	0.348344	0.130928	0.101016		0.00279131	0.001278	0.004662
2.8.0	10-5-1_608pg_Set 1 Amp 1_rep-28075	3	14412780	9620.58	37.6131	1.06293	341	255	73		50.9416	38.0942	10.9642		3.24478	Back Stutter	4.87452	Forward Stutter	6.22153	85	0.595426	0.378506	0.231661		0.00220569	0.00181385	0.00498624
2.8.0	10-5-1_608pg_Set 1 Amp 1_rep-60279	3	13408823	20090.7	37.5524	1.06631	343	253	67		51.8263	38.129	10.0447		3.17038	Back Stutter	4.38962	Forward Stutter	5.9548	85	0.538132	0.42021	0.180933		0.00190076	0.00202916	0.0039001
2.8.0	10-5-1_608pg_Set 1 Amp 1_rep-67655	3	11156931	16829.3	39.421	1.15308	333	247	68		51.4503	38.1295	10.4202		3.34984	Back Stutter	5.01782	Forward Stutter	6.38294	85	0.495823	0.383969	0.19151		0.00179957	0.00186738	0.00419235
2.8.0	10-5-1_608pg_Set 1 Amp 1_rep-213976	3	14843923	12524.8	37.2484	1.06819	344	249	69		51.9466	37.6028	10.4506		3.25308	Back Stutter	4.65512	Forward Stutter	8.26037	85	0.533554	0.432049	0.206611		0.00186194	0.00213428	0.00454472
2.8.0	10-5-1_608pg_Set 1 Amp 1_rep-216810	3	14101575	10310.2	36.9785	1.13189	349	254	69		51.904	37.8135	10.2825		3.56519	Back Stutter	4.39554	Forward Stutter	5.38308	85	0.598821	0.380182	0.200913		0.0021612	0.00181588	0.00435818
2.8.0	10-5-1_608pg_Set 1 Amp 1_rep-723135	3	14534084	15596.8	38.2486	1.14633	334	248	68		51.4292	38.113	10.4578		3.1054	Back Stutter	4.28057	Forward Stutter	8.74508	85	0.440058	0.396579	0.192317		0.00156663	0.00197041	0.00417653
2.8.0	10-5-1_608pg_Set 1 Amp 1_rep-848408	3	13900280	14828.3	37.9386	1.35675	345	254	65		51.911	38.2711	9.81791		3.85404	Back Stutter	4.48197	Forward Stutter	7.39596	85	0.596064	0.422876	0.177924		0.00216959	0.00204243	0.00393343
2.8.0	10-5-1_608pg_Set 1 Amp 1_rep-858042	3	16013249	12603.6	38.2678	1.07767	345	255	67		51.7712	38.2206	10.0081		3.19529	Back Stutter	4.47356	Forward Stutter	4.73258	85	0.585332	0.372337	0.178987		0.00210412	0.00175541	0.00383474
2.8.0	10-5-1_608pg_Set 1 Amp 1_rep-979142	3	14213618	11113.7	38.0968	1.14546	341	252	66		51.7184	38.2202	10.0613		3.47333	Back Stutter	4.50765	Forward Stutter	6.82983	85	0.50604	0.367876	0.173525		0.0017892	0.00175109	0.00374295
2.8.0	10-5-1_608pg_Set 1 Amp 1_rep-993333	3	14390437	12799.9	37.6915	1.13553	342	256	70		51.2423	38.3429	10.4148		3.34303	Back Stutter	4.27214	Forward Stutter	5.57284	85	0.496425	0.456169	0.205086		0.00172896	0.00221074	0.0044557
2.8.0	10-5-1_608pg_Set 1 Amp 2_rep-28075	3	10517240	12944.2	36.1255	1.05926	289	225	64		50.0651	38.9012	11.0338		3.58135	Back Stutter	5.0477	Forward Stutter	5.96909	85	0.490427	0.360218	0.187057		0.00210366	0.00194349	0.00448581
2.8.0	10-5-1_608pg_Set 1 Amp 2_rep-60279	3	9545756	9095.01	31.7486	1.02913	287	224	64		49.9333	38.9219	11.1448		3.54337	Back Stutter	4.16101	Forward Stutter	6.83802	85	0.592013	0.309602	0.189058		0.00269678	0.00163107	0.00454181
2.8.0	10-5-1_608pg_Set 1 Amp 2_rep-67655	3	12420535	14722.1	31.3947	1.17662	294	227	65		50.1817	38.7384	11.0799		3.63151	Back Stutter	4.78862	Forward Stutter	5.86589	85	0.542035	0.348563	0.198161		0.00234343	0.00187106	0.00477388
2.8.0	10-5-1_608pg_Set 1 Amp 2_rep-213976	3	10538365	23259.3	32.6883	1.15843	284	224	66		49.3998	39.093	11.5072		3.65228	Back Stutter	5.06455	Forward Stutter	4.79788	85	0.390153	0.405785	0.216872		0.00161706	0.00226338	0.00538509
2.8.0	10-5-1_608pg_Set 1 Amp 2_rep-216810	3	12651110	14255.7	30.9594	1.06773	288	223	65		49.907	38.7113	11.3817		3.55795	Back Stutter	4.97095	Forward Stutter	6.22262	85	0.515941	0.333694	0.2065		0.00225495	0.0018086	0.00511973
2.8.0	10-5-1_608pg_Set 1 Amp 2_rep-723135	3	13570513	19737.4	31.9429	1.22871	287	223	64		50.0203	38.9251	11.0546		3.87732	Back Stutter	6.58599	Forward Stutter	6.42379	85	0.544805	0.326208	0.191628		0.00241312	0.00175237	0.00465221
2.8.0	10-5-1_608pg_Set 1 Amp 2_rep-848408	3	11392048	21488.9	32.4282	1.10203	304	232	65		50.5046	38.7082	10.7872		3.6539	Back Stutter	7.13439	Forward Stutter	6.72	85	0.632372	0.341542	0.187968		0.00277412	0.00177489	0.00436112
2.8.0	10-5-1_608pg_Set 1 Amp 2_rep-858042	3	13059463	12305.6	32.6301	1.1557	289	227	65		49.7294	39.0371	11.2335		3.72214	Back Stutter	6.2229	Forward Stutter	5.91015	85	0.537729	0.330668	0.204567		0.00236214	0.00175278	0.00494799
2.8.0	10-5-1_608pg_Set 1 Amp 2_rep-979142	3	11206348	15316.1	31.6465	1.10074	300	233	69		49.8966	38.6801	11.4233		3.94837	Back Stutter	5.5543	Forward Stutter	9.14672	85	0.70627	0.257651	0.228812		0.00322034	0.00130816	0.00557822
2.8.0	10-5-1_608pg_Set 1 Amp 2_rep-993333	3	14137807	14532.3	32.2378	1.22744	296	229	67		50.0141	38.6122	11.3737		3.7223	Back Stutter	4.72467	Forward Stutter	7.39081	85	0.641145	0.301822	0.217639		0.00287434	0.00155463	0.00523895
2.8.0	10-5-1_800pg_Set 1 Amp 1_rep-28075	3	12773259	26681.2	29.0523	1.14919	333	246	52		52.7957	38.9473	8.25709		4.96828	Back Stutter	7.23127	Forward Stutter	5.75429	85	0.742439	0.356648	0.0824495		0.00295408	0.00172221	0.00190118
2.8.0	10-5-1_800pg_Set 1 Amp 1_rep-60279	3	12227958	13689.4	30.076	1.12434	325	245	54		52.1488	39.2366	8.61459		4.42795	Back Stutter	4.88369	Forward Stutter	10.0651	85	0.730704	0.370325	0.0957262		0.00299266	0.00183134	0.00220785
2.8.0	10-5-1_800pg_Set 1 Amp 1_rep-67655	3	13299285	11676.1	29.1088	1.14812	345	247	55		53.32	38.2423	8.43773		4.65805	Back Stutter	6.11532	Forward Stutter	8.04096	85	0.859571	0.361865	0.0973271		0.00348344	0.0017354	0.00218455
2.8.0	10-5-1_800pg_Set 1 Amp 1_rep-213976	3	11311599	9535.93	29.5402	1.16294	335	249	54		52.4882	39.0008	8.51099		4.57495	Back Stutter	8.35436	Forward Stutter	5.24983	85	0.761031	0.41995	0.102372		0.00306452	0.00205802	0.00234856
2.8.0	10-5-1_800pg_Set 1 Amp 1_rep-216810	3	13182556	16054.1	29.1573	1.15682	319	240	54		52.0248	39.1467	8.82851		4.75696	Back Stutter	6.06174	Forward Stutter	5.4044	85	0.668396	0.374864	0.106338		0.00274486	0.00188547	0.00249684
2.8.0	10-5-1_800pg_Set 1 Amp 1_rep-723135	3	11236546	9554.44	29.4637	1.02109	328	245	57		52.0486	38.9016	9.04977		4.50768	Back Stutter	5.53193	Forward Stutter	7.09999	85	0.66557	0.39074	0.119588		0.00260607	0.00193394	0.00271584
2.8.0	10-5-1_800pg_Set 1 Amp 1_rep-848408	3	12035616	9443.17	30.9397	1.09338	344	246	53		53.3679	38.3643	8.26777		4.37718	Back Stutter	5.05389	Forward Stutter	5.61705	85	0.817586	0.333249	0.0894855		0.00323437	0.00159384	0.00202663
2.8.0	10-5-1_800pg_Set 1 Amp 1_rep-858042	3	14215896	17479.6	29.7495	1.18115	327	241	52		52.7765	38.8997	8.32378		4.38245	Back Stutter	5.53725	Forward Stutter	6.78656	85	0.673895	0.38467	0.0858885		0.00267839	0.00192429	0.00201902
2.8.0	10-5-1_800pg_Set 1 Amp 1_rep-979142	3	14845693	17120.7	31.2526	1.13699	323	242	53		52.3135	39.1516	8.53483		3.99422	Back Stutter	6.40226	Forward Stutter	6.69363	85	0.584903	0.412798	0.0949636		0.00224794	0.00208755	0.00219082
2.8.0	10-5-1_800pg_Set 1 Amp 1_rep-993333	3	12977409	25544	29.7376	1.08736	336	242	52		53.3162	38.4632	8.22058		4.07954	Back Stutter	5.28506	Forward Stutter	7.60075	85	0.729991	0.350507	0.0794442		0.00287636	0.00172377	0.00182793
2.8.0	10-5-1_800pg_Set 1 Amp 2_rep-28075	3	12001585	9927.66	34.0189	1.08546	387	249	67		55.0128	35.4518	9.53541		4.15272	Back Stutter	4.11151	Forward Stutter	5.03857	85	0.646362	0.276875	0.153073		0.00205192	0.00125748	0.00304483
2.8.0	10-5-1_800pg_Set 1 Amp 2_rep-60279	3	12461195	46523.6	35.8057	1.16583	403	253	70		55.579	34.8348	9.58614		3.98221	Back Stutter	4.32532	Forward Stutter	5.00818	85	0.784901	0.24025	0.168441		0.00249702	0.00105598	0.00329909
2.8.0	10-5-1_800pg_Set 1 Amp 2_rep-67655	3	12497664	22143.9	36.5834	1.08548	400	251	73		55.2532	34.6801	10.0667		3.90026	Back Stutter	3.95384	Forward Stutter	6.21806	85	0.691936	0.269445	0.190451		0.00213425	0.00121166	0.00370769
2.8.0	10-5-1_800pg_Set 1 Amp 2_rep-213976	3	11520753	12713.4	39.3383	1.18168	383	244	68		55.0998	35.151	9.74918		4.31738	Back Stutter	3.97037	Forward Stutter	5.45399	85	0.649128	0.25461	0.166384		0.00208857	0.00117321	0.00338726
2.8.0	10-5-1_800pg_Set 1 Amp 2_rep-216810	3	13525214	22968.7	34.9557	1.17224	393	255	72		54.5644	35.4636	9.97205		4.19579	Back Stutter	3.99947	Forward Stutter	5.10856	85	0.66287	0.293089	0.181684		0.00205438	0.00130191	0.00347948
2.8.0	10-5-1_800pg_Set 1 Amp 2_rep-723135	3	11524100	11343.3	33.8392	1.14477	380	244	67		54.8832	35.3464	9.77031		4.13068	Back Stutter	4.34425	Forward Stutter	7.17368	85	0.6257	0.28654	0.163143		0.00201735	0.00134232	0.00331543
2.8.0	10-5-1_800pg_Set 1 Amp 2_rep-848408	3	12863701	17818.3	34.2978	1.06998	403	251	69		55.7454	34.6945	9.56002		4.14535	Back Stutter	4.28673	Forward Stutter	5.25259	85	0.759915	0.255739	0.167917		0.00237869	0.00114396	0.00330369
2.8.0	10-5-1_800pg_Set 1 Amp 2_rep-858042	3	13706154	12384.2	35.1363	1.17808	407	258	75		55.0447	34.835	10.1203		4.55782	Back Stutter	4.29022	Forward Stutter	4.71313	85	0.804536	0.248931	0.202738		0.00251484	0.00108297	0.00389895
2.8.0	10-5-1_800pg_Set 1 Amp 2_rep-979142	3	12382711	10581.8	36.2457	1.13561	398	250	72		55.1998	34.7867	10.0135		4.335	Back Stutter	5.99613	Forward Stutter	6.17688	85	0.791221	0.26225	0.187915		0.00256014	0.0011792	0.00369864
2.8.0	10-5-1_800pg_Set 1 Amp 2_rep-993333	3	13054640	15651.5	34.4642	1.17552	382	244	64		55.2882	35.4171	9.29469		4.2332	Back Stutter	4.14707	Forward Stutter	5.59283	85	0.623395	0.245887	0.137597		0.00199428	0.00112538	0.00278913
2.8.0	10-5-1_1.4ng_Set 2 Amp 1_rep-35262	3	31735213	16922	63.42	1.02643	1090	692	137		56.7741	36.0654	7.16045		2.98121	Back Stutter	7.03816	Forward Stutter	5.31972	85	1.74029	0.690539	0.27974		0.00192381	0.0011133	0.00261418
2.8.0	10-5-1_1.4ng_Set 2 Amp 1_rep-104565	3	24926804	15249.6	63.9474	1.16482	1107	699	145		56.7595	35.8214	7.41914		3.24231	Back Stutter	7.35891	Forward Stutter	4.06317	85	1.89242	0.747345	0.338592		0.00209609	0.00120598	0.00316632
2.8.0	10-5-1_1.4ng_Set 2 Amp 1_rep-562810	3	26785172	12622.8	63.8131	1.05996	1090	685	135		57.041	35.891	7.06805		3.09073	Back Stutter	6.7305	Forward Stutter	5.45597	85	1.79519	0.678895	0.272058		0.00199799	0.00110385	0.00257924
2.8.0	10-5-1_1.4ng_Set 2 Amp 1_rep-626603	3	32741484	18523.1	63.1993	1.16353	1069	677	138		56.7705	35.922	7.3075		3.16832	Back Stutter	6.59853	Forward Stutter	5.28298	85	1.64826	0.60051	0.29038		0.00184174	0.000975262	0.00274082
2.8.0	10-5-1_1.4ng_Set 2 Amp 1_rep-655450	3	27667518	17090.6	63.2182	1.03313	1079	684	138		56.7663	35.9918	7.24189		3.1062	Back Stutter	6.46361	Forward Stutter	4.74785	85	1.63535	0.594666	0.280146		0.00180283	0.000953161	0.0026092
2.8.0	10-5-1_1.4ng_Set 2 Amp 1_rep-803747	3	28245160	14301.5	64.6885	1.07667	1097	688	137		57.0795	35.7841	7.13642		3.01034	Back Stutter	6.6759	Forward Stutter	5.18991	85	1.73023	0.610842	0.26979		0.00189512	0.000977186	0.00250371
2.8.0	10-5-1_1.4ng_Set 2 Amp 1_rep-874844	3	30640937	15864.2	64.6231	1.10911	1047	660	134		56.8718	35.8581	7.27013		3.09302	Back Stutter	6.62607	Forward Stutter	5.19455	85	1.56592	0.54662	0.27522		0.001777	0.000904442	0.00264267
2.8.0	10-5-1_1.4ng_Set 2 Amp 1_rep-887628	3	30627503	17248.3	65.2059	1.1344	1101	696	139		56.865	35.9631	7.17193		3.28892	Back Stutter	6.40979	Forward Stutter	4.45823	85	1.83921	0.713933	0.298024		0.00203333	0.00114599	0.00279964
2.8.0	10-5-1_1.4ng_Set 2 Amp 1_rep-952324	3	30018543	13780.7	64.0327	1.04757	1063	670	134		56.9634	35.8859	7.1507		3.01312	Back Stutter	6.82349	Forward Stutter	4.59088	85	1.64517	0.592521	0.264769		0.0018496	0.000970944	0.00252249
2.8.0	10-5-1_1.4ng_Set 2 Amp 1_rep-960932	3	24411253	15568.8	63.9303	1.07776	1105	694	141		56.9523	35.7806	7.26707		3.14819	Back Stutter	6.55495	Forward Stutter	4.81562	85	1.81696	0.679922	0.306746		0.00199174	0.00108845	0.00285305
2.8.0	10-5-1_1.4ng_Set 2 Amp 2_rep-35262	3	12114542	20651	60.1024	1.02016	1192	720	157		57.5939	34.8138	7.59232		3.5595	Back Stutter	5.31632	Forward Stutter	6.9644	85	2.32733	0.733911	0.485023		0.00247129	0.00113643	0.00479567
2.8.0	10-5-1_1.4ng_Set 2 Amp 2_rep-104565	3	12845963	19076.4	60.194	1.00956	1166	709	156		57.3916	34.9276	7.68077		3.70404	Back Stutter	5.29223	Forward Stutter	5.39072	85	2.19205	0.669096	0.482154		0.00235997	0.00104738	0.00481674
2.8.0	10-5-1_1.4ng_Set 2 Amp 2_rep-562810	3	12352424	16747.4	59.0501	1.04017	1165	704	152		57.6415	34.8658	7.49271		3.58322	Back Stutter	5.54702	Forward Stutter	6.40831	85	2.27878	0.717679	0.461528		0.00248055	0.00113908	0.00469297
2.8.0	10-5-1_1.4ng_Set 2 Amp 2_rep-626603	3	15975246	18650.9	58.0234	1.07653	1144	693	148		57.6281	34.9015	7.47042		3.58493	Back Stutter	5.35114	Forward Stutter	5.98935	85	2.13984	0.635282	0.440687		0.00234413	0.00101511	0.004511
2.8.0	10-5-1_1.4ng_Set 2 Amp 2_rep-655450	3	16485467	15214.2	60.5587	1.39434	1147	702	149		57.3605	35.1734	7.46607		3.85666	Back Stutter	5.59825	Forward Stutter	5.57433	85	2.22236	0.712181	0.450546		0.00245002	0.0011352	0.00460998
2.8.0	10-5-1_1.4ng_Set 2 Amp 2_rep-803747	3	11095942	17360.8	60.3474	1.07891	1181	726	155		57.2618	35.2083	7.52989		3.91881	Back Stutter	5.32838	Forward Stutter	4.35945	85	2.22463	0.702363	0.467716		0.00237134	0.00108102	0.00462389
2.8.0	10-5-1_1.4ng_Set 2 Amp 2_rep-874844	3	13702711	20740.8	59.3875	1.09866	1166	704	153		57.647	34.8158	7.53729		3.4331	Back Stutter	5.2854	Forward Stutter	3.90131	85	2.25094	0.694517	0.463101		0.00244688	0.00110592	0.00467416
2.8.0	10-5-1_1.4ng_Set 2 Amp 2_rep-887628	3	12844565	14055.6	59.5734	1.02884	1194	718	158		57.6696	34.6777	7.65267		3.32413	Back Stutter	5.21726	Forward Stutter	8.0133	85	2.30651	0.705852	0.491198		0.00244024	0.00109403	0.00483758
2.8.0	10-5-1_1.4ng_Set 2 Amp 2_rep-952324	3	14372227	18974.1	59.9728	1.02858	1196	719	156		57.7439	34.7128	7.54335		3.26504	Back Stutter	5.47228	Forward Stutter	4.99132	85	2.29657	0.713381	0.473512		0.00242482	0.00110838	0.00465761
2.8.0	10-5-1_1.4ng_Set 2 Amp 2_rep-960932	3	14150529	15760.9	59.364	1.03985	1136	700	151		57.1635	35.2253	7.61114		3.65907	Back Stutter	5.77142	Forward Stutter	7.02065	85	1.95143	0.568567	0.4501		0.00210669	0.000887716	0.00452082
2.8.0	10-5-1_3.2ng_Set 2 Amp 1_rep-35262	3	20586742	9718.99	81.9904	1.05094	3069	1754	354		59.281	33.8833	6.83572		4.92277	Back Stutter	14.608	Forward Stutter	2.77621	81	4.07718	1.276	0.607505		0.00154352	0.00078549	0.00209529
2.8.0	10-5-1_3.2ng_Set 2 Amp 1_rep-104565	3	28734249	16622.1	82.2315	1.51853	3198	1826	378		59.1995	33.7989	7.00167		5.3167	Back Stutter	14.8207	Forward Stutter	2.63428	81	4.68971	1.59811	0.76886		0.0017336	0.000961221	0.00264611
2.8.0	10-5-1_3.2ng_Set 2 Amp 1_rep-562810	3	28037976	14156.4	82.5285	1.11648	3094	1767	358		59.2787	33.8553	6.86598		4.75604	Back Stutter	15.1288	Forward Stutter	3.23141	81	4.14122	1.30386	0.614163		0.00155783	0.000798766	0.00209587
2.8.0	10-5-1_3.2ng_Set 2 Amp 1_rep-626603	3	26944546	11286.3	82.4106	1.0304	3059	1740	364		59.2512	33.7	7.04879		4.60736	Back Stutter	15.9604	Forward Stutter	2.55806	81	4.11206	1.25016	0.660004		0.00156598	0.000776377	0.00224931
2.8.0	10-5-1_3.2ng_Set 2 Amp 1_rep-655450	3	25731034	15098.1	82.8877	1.07044	3115	1769	366		59.3367	33.7022	6.96108		4.68393	Back Stutter	15.7204	Forward Stutter	3.4054	81	4.36482	1.37371	0.658133		0.00164462	0.00084462	0.00222962
2.8.0	10-5-1_3.2ng_Set 2 Amp 1_rep-803747	3	27609209	9561.31	83.3917	1.10952	3059	1746	357		59.2598	33.8158	6.92436		4.85857	Back Stutter	15.817	Forward Stutter	2.64237	81	3.97724	1.19138	0.614207		0.00150573	0.000733271	0.00210711
2.8.0	10-5-1_3.2ng_Set 2 Amp 1_rep-874844	3	27444151	17267	82.1274	1.09757	3093	1760	365		59.2632	33.7313	7.0055		4.70998	Back Stutter	15.1015	Forward Stutter	3.27844	81	4.27469	1.34836	0.672618		0.00161728	0.000831281	0.00229441
2.8.0	10-5-1_3.2ng_Set 2 Amp 1_rep-887628	3	26865688	17175.6	83.9121	2.99017	3038	1739	360		59.1449	33.8562	6.99888		5.8699	Back Stutter	14.7658	Forward Stutter	3.64962	81	4.14088	1.29068	0.760724		0.00159286	0.000803821	0.00285208
2.8.0	10-5-1_3.2ng_Set 2 Amp 1_rep-952324	3	25844769	10892.9	82.5249	2.85616	3062	1757	356		59.1676	33.9682	6.86421		5.84011	Back Stutter	15.0317	Forward Stutter	3.06103	81	4.21158	1.37176	0.657408		0.00160917	0.000847883	0.00231414
2.8.0	10-5-1_3.2ng_Set 2 Amp 1_rep-960932	3	26011670	14420.2	81.2041	1.03914	3122	1775	367		59.3128	33.7123	6.97491		4.71997	Back Stutter	15.2495	Forward Stutter	3.31068	81	4.67277	1.58134	0.697486		0.00177988	0.000982795	0.00239006
2.8.0	10-5-1_3.2ng_Set 2 Amp 2_rep-35262	3	43085270	12682.6	88.3814	1.02644	2668	1498	270		60.1579	33.7639	6.07818		2.41199	Back Stutter	12.8582	Forward Stutter	2.88019	81	3.79203	0.982829	0.424348		0.00167105	0.000703091	0.00188931
2.8.0	10-5-1_3.2ng_Set 2 Amp 2_rep-104565	3	44527328	15124.9	88.2047	1.02709	2686	1507	271		60.1661	33.7519	6.08203		2.44156	Back Stutter	13.0423	Forward Stutter	3.16721	81	4.08193	1.16687	0.46035		0.00181105	0.000840403	0.00207105
2.8.0	10-5-1_3.2ng_Set 2 Amp 2_rep-562810	3	39801328	17247.2	88.2873	1.01993	2726	1525	279		60.1771	33.6668	6.1561		2.45916	Back Stutter	13.1105	Forward Stutter	2.97781	81	4.37577	1.32981	0.51642		0.0019357	0.000957865	0.00231526
2.8.0	10-5-1_3.2ng_Set 2 Amp 2_rep-626603	3	45486735	14077.5	88.008	1.0228	2700	1510	274		60.2107	33.6799	6.10934		2.38056	Back Stutter	12.7444	Forward Stutter	4.0147	81	3.94882	1.03861	0.452861		0.00173019	0.000740159	0.00200731
2.8.0	10-5-1_3.2ng_Set 2 Amp 2_rep-655450	3	42217751	16532.6	87.7407	3.35039	2702	1503	271		60.3602	33.576	6.06385		3.36135	Back Stutter	12.9673	Forward Stutter	3.12221	81	4.16241	1.13195	0.480885		0.00184373	0.000816605	0.00220132
2.8.0	10-5-1_3.2ng_Set 2 Amp 2_rep-803747	3	37240638	14615.2	88.0018	1.07957	2701	1514	275		60.1559	33.7129	6.13113		2.44365	Back Stutter	13.0535	Forward Stutter	3.19814	81	4.22793	1.25088	0.488015		0.00187724	0.000903192	0.00218966
2.8.0	10-5-1_3.2ng_Set 2 Amp 2_rep-874844	3	44842009	13893.4	88.2148	3.43871	2677	1502	271		60.1473	33.7549	6.09777		3.63852	Back Stutter	12.5207	Forward Stutter	3.03074	81	4.25379	1.24527	0.52631		0.00191228	0.000903681	0.00251773
2.8.0	10-5-1_3.2ng_Set 2 Amp 2_rep-887628	3	36830798	9881.97	87.9081	1.02725	2610	1460	265		60.2035	33.6848	6.11173		2.54209	Back Stutter	12.9226	Forward Stutter	2.61815	81	4.05089	1.16872	0.469004		0.00185417	0.000868905	0.00217323
2.8.0	10-5-1_3.2ng_Set 2 Amp 2_rep-952324	3	31974597	12321	87.4361	1.04816	2645	1482	269		60.1667	33.7111	6.12222		2.60948	Back Stutter	13.4964	Forward Stutter	3.76267	81	3.96554	1.10526	0.463635		0.00178236	0.000807633	0.0021119
2.8.0	10-5-1_3.2ng_Set 2 Amp 2_rep-960932	3	43090267	8294.22	88.5888	1.06937	2691	1509	271		60.1953	33.753	6.05169		2.60233	Back Stutter	12.7118	Forward Stutter	2.76216	81	4.1548	1.213	0.462486		0.00184399	0.000873732	0.00208654
2.8.0	10-5-1_100pg_Set 2 Amp 1_rep-35262	3	3487106	8296.04	8.64379	1.01701	65	45	30		46.3854	32.1813	21.4333		2.46449	Back Stutter	9.56892	Forward Stutter	4.84959	85	0.181033	0.081915	0.0485429		0.00413181	0.00229253	0.00201493
2.8.0	10-5-1_100pg_Set 2 Amp 1_rep-104565	3	3577480	10589.6	8.6188	1.15765	66	47	29		46.8004	33.1341	20.0655		2.6323	Back Stutter	9.10027	Forward Stutter	6.7891	85	0.184951	0.109123	0.0576892		0.00411813	0.0031691	0.00293883
2.8.0	10-5-1_100pg_Set 2 Amp 1_rep-562810	3	3326068	9093.91	7.67449	1.03261	65	46	30		46.1888	32.7592	21.052		2.44912	Back Stutter	9.2355	Forward Stutter	5.60628	85	0.179412	0.093086	0.0581115		0.00400367	0.00263827	0.00258654
2.8.0	10-5-1_100pg_Set 2 Amp 1_rep-626603	3	3145755	12098.7	8.19028	1.08795	66	47	28		46.9533	33.2468	19.7999		2.58078	Back Stutter	9.73593	Forward Stutter	4.86528	85	0.189372	0.103017	0.0481588		0.0042146	0.00291559	0.00236664
2.8.0	10-5-1_100pg_Set 2 Amp 1_rep-655450	3	3495131	19963.3	9.90905	1.11732	66	46	31		46.0627	32.3967	21.5406		2.42544	Back Stutter	8.7329	Forward Stutter	5.12375	85	0.187423	0.094418	0.0489096		0.0042291	0.00264312	0.00196473
2.8.0	10-5-1_100pg_Set 2 Amp 1_rep-803747	3	3186925	11587.4	9.312	1.03507	65	45	28		46.8522	32.8005	20.3473		2.43434	Back Stutter	8.44331	Forward Stutter	7.99019	85	0.177901	0.0913056	0.0567552		0.00400374	0.00261754	0.00276581
2.8.0	10-5-1_100pg_Set 2 Amp 1_rep-874844	3	3250167	8035.62	8.75568	1.06574	64	44	27		47.219	32.5796	20.2015		2.41934	Back Stutter	9.74218	Forward Stutter	8.00552	85	0.176697	0.0743157	0.0486338		0.00404865	0.00208708	0.00243124
2.8.0	10-5-1_100pg_Set 2 Amp 1_rep-887628	3	3293756	15939.3	9.11447	1.10266	65	47	31		45.6272	32.7678	21.605		2.81845	Back Stutter	9.62319	Forward Stutter	6.14231	85	0.170481	0.100039	0.0620167		0.00374826	0.00289474	0.00266002
2.8.0	10-5-1_100pg_Set 2 Amp 1_rep-952324	3	3297352	17713.3	8.5513	1.03138	68	46	30		47.1201	32.0794	20.8006		2.53847	Back Stutter	9.65097	Forward Stutter	8.65189	85	0.197082	0.0863842	0.0600586		0.00439312	0.00235529	0.00266934
2.8.0	10-5-1_100pg_Set 2 Amp 1_rep-960932	3	3286236	17668.7	8.61602	1.06724	67	46	29		46.7981	32.4652	20.7367		2.75409	Back Stutter	8.5617	Forward Stutter	6.21232	85	0.183535	0.099863	0.0502498		0.00398786	0.00289102	0.00214751
2.8.0	10-5-1_100pg_Set 2 Amp 2_rep-35262	3	4532241	15580.6	12.1343	1.05087	85	61	40		45.6477	32.843	21.5093		3.20463	Back Stutter	10.6537	Forward Stutter	5.70477	85	0.19946	0.10758	0.0631237		0.00319514	0.00220664	0.00203562
2.8.0	10-5-1_100pg_Set 2 Amp 2_rep-104565	3	4315527	12341	13.6448	1.17382	82	59	39		45.4981	32.8444	21.6575		2.84448	Back Stutter	10.3521	Forward Stutter	8.60795	85	0.179331	0.101923	0.0632207		0.00291218	0.00211869	0.00200446
2.8.0	10-5-1_100pg_Set 2 Amp 2_rep-562810	3	4200984	9929.11	12.2734	1.12753	83	59	40		45.4434	32.5128	22.0438		3.30061	Back Stutter	7.27937	Forward Stutter	5.41113	85	0.187335	0.109655	0.0529074		0.00302836	0.00240605	0.0015408
2.8.0	10-5-1_100pg_Set 2 Amp 2_rep-626603	3	4761452	19120.7	12.6749	1.17745	82	60	37		45.9938	33.3771	20.6291		3.28675	Back Stutter	9.05488	Forward Stutter	7.03881	85	0.177345	0.112631	0.0624949		0.00285731	0.00236981	0.0022966
2.8.0	10-5-1_100pg_Set 2 Amp 2_rep-655450	3	4429670	16019	12.7021	1.15558	84	61	41		45.1319	32.6348	22.2333		3.53871	Back Stutter	8.30036	Forward Stutter	7.75275	85	0.206156	0.108986	0.0458611		0.00339024	0.00224284	0.0012646
2.8.0	10-5-1_100pg_Set 2 Amp 2_rep-803747	3	5450961	14335	11.7786	1.24485	87	63	41		45.6192	32.8745	21.5063		3.47099	Back Stutter	7.72316	Forward Stutter	7.6565	85	0.213647	0.115111	0.0598087		0.00338731	0.00230221	0.00173703
2.8.0	10-5-1_100pg_Set 2 Amp 2_rep-874844	3	5174935	17361.2	12.0591	1.21569	82	59	39		45.5359	32.8249	21.6392		3.46749	Back Stutter	8.98827	Forward Stutter	4.47008	85	0.186114	0.101965	0.0687517		0.00305455	0.00213946	0.00230468
2.8.0	10-5-1_100pg_Set 2 Amp 2_rep-887628	3	4518899	8730.5	14.5685	1.02399	85	62	42		44.9431	32.9948	22.0621		3.11112	Back Stutter	8.90176	Forward Stutter	5.64949	85	0.188709	0.117951	0.0643436		0.00295084	0.00239342	0.00191531
2.8.0	10-5-1_100pg_Set 2 Amp 2_rep-952324	3	4471552	14286.8	14.06	1.05292	84	61	41		45.1515	32.8916	21.9569		2.81633	Back Stutter	9.21548	Forward Stutter	6.0976	85	0.194762	0.113362	0.0618958		0.00311969	0.00231356	0.00181907
2.8.0	10-5-1_100pg_Set 2 Amp 2_rep-960932	3	5408236	23738.1	11.8078	1.15339	83	59	40		45.4862	32.5556	21.9583		3.15482	Back Stutter	8.43996	Forward Stutter	6.35731	85	0.196731	0.0934375	0.0553018		0.00321723	0.00188869	0.00163308
2.8.0	10-5-1_400pg_Set 2 Amp 1_rep-35262	3	21318594	10979.4	32.2081	1.20587	312	197	80		52.8616	33.4723	13.6661		3.49592	Back Stutter	11.0612	Forward Stutter	5.9048	85	0.631769	0.218444	0.159145		0.00258656	0.00125912	0.00258896
2.8.0	10-5-1_400pg_Set 2 Amp 1_rep-104565	3	17526888	16899.1	31.6953	1.172	294	200	80		51.1634	34.8454	13.9913		4.22236	Back Stutter	9.25901	Forward Stutter	7.23137	85	0.573311	0.214388	0.16388		0.00246965	0.00120157	0.00262088
2.8.0	10-5-1_400pg_Set 2 Amp 1_rep-562810	3	17717168	17138.8	32.8497	1.22586	294	199	81		51.1752	34.7121	14.1128		4.15996	Back Stutter	12.4168	Forward Stutter	6.73284	85	0.57747	0.23118	0.152035		0.00250053	0.00132787	0.00237918
2.8.0	10-5-1_400pg_Set 2 Amp 1_rep-626603	3	17038714	23689.9	33.789	1.11047	300	201	78		51.8128	34.784	13.4032		3.58091	Back Stutter	12.071	Forward Stutter	6.41807	85	0.610455	0.23946	0.133442		0.00263043	0.00136759	0.00211488
2.8.0	10-5-1_400pg_Set 2 Amp 1_rep-655450	3	16164454	22565	30.5451	1.22129	284	197	80		50.6113	35.1045	14.2842		4.20391	Back Stutter	10.9245	Forward Stutter	6.25458	85	0.508312	0.220061	0.159866		0.00221045	0.00127101	0.00257072
2.8.0	10-5-1_400pg_Set 2 Amp 1_rep-803747	3	18054363	14107.5	32.2716	1.30357	298	201	82		51.2122	34.6786	14.1092		4.23137	Back Stutter	10.3691	Forward Stutter	6.02706	85	0.582073	0.234907	0.154058		0.00245882	0.00134111	0.00240367
2.8.0	10-5-1_400pg_Set 2 Amp 1_rep-874844	3	14904617	20913.4	32.2243	1.1382	286	200	81		50.5204	35.2655	14.2141		3.7478	Back Stutter	11.8976	Forward Stutter	6.16104	85	0.530177	0.238743	0.157668		0.00231289	0.00137178	0.0025141
2.8.0	10-5-1_400pg_Set 2 Amp 1_rep-887628	3	13755380	24482.6	29.9476	1.11669	295	201	83		50.9227	34.7673	14.31		3.63733	Back Stutter	9.64256	Forward Stutter	6.85049	85	0.587077	0.24403	0.190004		0.00253472	0.00139266	0.00307517
2.8.0	10-5-1_400pg_Set 2 Amp 1_rep-952324	3	13534255	10346.7	32.489	1.15504	302	198	82		51.7734	34.1074	14.1192		3.8603	Back Stutter	11.1022	Forward Stutter	6.38378	85	0.602703	0.208109	0.145288		0.00257782	0.00117668	0.00223045
2.8.0	10-5-1_400pg_Set 2 Amp 1_rep-960932	3	12676111	9690.12	33.407	1.07413	304	201	80		51.9667	34.3265	13.7068		3.73596	Back Stutter	12.545	Forward Stutter	5.22904	85	0.635329	0.272146	0.159564		0.00269783	0.00158513	0.00257306
2.8.0	10-5-1_400pg_Set 2 Amp 2_rep-35262	3	8826077	13742.6	26.3349	1.0751	236	184	55		49.6767	38.7716	11.5517		3.91819	Back Stutter	8.56444	Forward Stutter	6.14201	85	0.370805	0.221696	0.189559		0.00188455	0.0013789	0.00582568
2.8.0	10-5-1_400pg_Set 2 Amp 2_rep-104565	3	9522325	5822.05	31.1665	1.08624	246	188	49		50.9104	38.8715	10.2181		3.53602	Back Stutter	6.5043	Forward Stutter	5.62527	85	0.436252	0.223928	0.131877		0.00219134	0.00135938	0.00386685
2.8.0	10-5-1_400pg_Set 2 Amp 2_rep-562810	3	9202498	17684.6	28.0141	1.04585	248	192	49		50.6838	39.2754	10.0407		3.74432	Back Stutter	8.43546	Forward Stutter	6.55357	85	0.429087	0.224301	0.142165		0.00213315	0.001327	0.00433148
2.8.0	10-5-1_400pg_Set 2 Amp 2_rep-626603	3	7657330	14640.8	27.1471	1.06327	238	186	45		50.722	39.6745	9.60349		3.88297	Back Stutter	7.87471	Forward Stutter	6.30924	85	0.39938	0.234145	0.129764		0.00204463	0.00144169	0.00426716
2.8.0	10-5-1_400pg_Set 2 Amp 2_rep-655450	3	7914266	21777.4	27.5747	1.06842	254	189	46		51.8806	38.6952	9.42425		3.9756	Back Stutter	8.8425	Forward Stutter	6.82166	85	0.540308	0.25091	0.119281		0.00278667	0.00154427	0.00369291
2.8.0	10-5-1_400pg_Set 2 Amp 2_rep-803747	3	8218775	14569	27.9369	1.08471	240	186	49		50.5178	39.2243	10.2579		3.95191	Back Stutter	7.01289	Forward Stutter	5.36613	85	0.383646	0.226484	0.152293		0.00193676	0.00139724	0.00491932
2.8.0	10-5-1_400pg_Set 2 Amp 2_rep-874844	3	9063542	10187	27.6066	1.17726	242	186	61		49.6015	38.0145	12.384		3.89293	Back Stutter	7.69336	Forward Stutter	6.53891	85	0.414144	0.296913	0.150369		0.00209132	0.0022607	0.00415394
2.8.0	10-5-1_400pg_Set 2 Amp 2_rep-887628	3	10465597	17125.8	25.4753	1.05796	238	186	52		50.1418	39.0723	10.7859		3.76974	Back Stutter	6.73518	Forward Stutter	6.22643	85	0.450505	0.201064	0.118288		0.00250147	0.00122142	0.00333037
2.8.0	10-5-1_400pg_Set 2 Amp 2_rep-952324	3	13291246	11165.7	27.7758	1.1677	241	187	54		50.1043	38.7862	11.1095		3.6766	Back Stutter	6.86789	Forward Stutter	5.36138	85	0.413789	0.215269	0.141581		0.00212023	0.00131169	0.0040038
2.8.0	10-5-1_400pg_Set 2 Amp 2_rep-960932	3	7214705	8628.43	27.3365	1.07033	249	190	48		51.1109	39.0189	9.8702		4.05823	Back Stutter	7.86131	Forward Stutter	4.57137	85	0.47064	0.257821	0.137514		0.00237998	0.0015808	0.00425244
2.8.0	10-5-1_800pg_Set 2 Amp 1_rep-35262	3	9064198	24703.1	38.4726	1.30673	547	393	78		53.7649	38.617	7.61805		5.15806	Back Stutter	8.87613	Forward Stutter	7.40577	85	0.822511	0.517629	0.18242		0.00178051	0.00153186	0.00316742
2.8.0	10-5-1_800pg_Set 2 Amp 1_rep-104565	3	11508664	22614	38.0045	1.18289	553	392	79		54.0169	38.3012	7.68195		5.02029	Back Stutter	10.304	Forward Stutter	6.50032	85	0.863498	0.528551	0.187293		0.00187699	0.00157018	0.00321106
2.8.0	10-5-1_800pg_Set 2 Amp 1_rep-562810	3	9822618	13117.9	39.5329	1.47041	543	390	79		53.7094	38.5178	7.7728		5.37769	Back Stutter	9.6193	Forward Stutter	6.15895	85	0.845257	0.5112	0.196488		0.00187799	0.00152354	0.00349492
2.8.0	10-5-1_800pg_Set 2 Amp 1_rep-626603	3	11818262	6094.85	39.1858	1.49261	554	397	76		53.9356	38.6695	7.39493		5.3152	Back Stutter	9.38049	Forward Stutter	10.1695	85	0.82525	0.482168	0.158351		0.00177581	0.00139776	0.00269019
2.8.0	10-5-1_800pg_Set 2 Amp 1_rep-655450	3	7639102	13181.1	37.1393	1.10754	547	401	78		53.3225	39.055	7.62254		5.62262	Back Stutter	8.01836	Forward Stutter	4.87479	85	0.854414	0.552627	0.186684		0.00187767	0.00160934	0.00326579
2.8.0	10-5-1_800pg_Set 2 Amp 1_rep-803747	3	10313518	18024	38.2988	1.19466	562	394	76		54.4523	38.1619	7.38581		4.75046	Back Stutter	9.62677	Forward Stutter	5.21368	85	0.870961	0.543203	0.16643		0.00186177	0.00161278	0.00287839
2.8.0	10-5-1_800pg_Set 2 Amp 1_rep-874844	3	9467485	10200.7	36.9039	1.2534	539	398	73		53.3316	39.4129	7.25544		5.81534	Back Stutter	8.07675	Forward Stutter	4.86555	85	0.797569	0.526308	0.163429		0.00176777	0.00153258	0.00296196
2.8.0	10-5-1_800pg_Set 2 Amp 1_rep-887628	3	8151702	11629.9	39.1382	1.1335	549	387	77		54.1915	38.2047	7.60383		4.73232	Back Stutter	8.83036	Forward Stutter	6.02884	85	0.771461	0.493703	0.174252		0.00165161	0.0014805	0.00302174
2.8.0	10-5-1_800pg_Set 2 Amp 1_rep-952324	3	9698353	27594.6	38.8035	1.34068	547	383	71		54.6134	38.3042	7.08241		4.75111	Back Stutter	8.36234	Forward Stutter	6.18168	85	0.828898	0.510036	0.13461		0.00181032	0.00155991	0.00239704
2.8.0	10-5-1_800pg_Set 2 Amp 1_rep-960932	3	9456770	17660.6	37.7896	1.11184	560	396	77		54.1844	38.3968	7.41883		4.87633	Back Stutter	8.42028	Forward Stutter	5.48001	85	0.824378	0.500492	0.164439		0.00173641	0.00145616	0.00281074
2.8.0	10-5-1_800pg_Set 2 Amp 2_rep-35262	3	16678870	18013.7	46.6047	1.15438	534	389	94		52.4813	38.259	9.25973		3.50745	Back Stutter	3.34062	Forward Stutter	6.78095	85	0.633797	0.475165	0.24861		0.00135547	0.00139617	0.00375686
2.8.0	10-5-1_800pg_Set 2 Amp 2_rep-104565	3	14569623	14424.1	48.0341	1.27508	541	412	98		51.4285	39.1881	9.38338		4.53841	Back Stutter	3.19175	Forward Stutter	5.40184	85	0.813027	0.567123	0.285866		0.00180209	0.00160433	0.00435445
2.8.0	10-5-1_800pg_Set 2 Amp 2_rep-562810	3	15159844	13378.4	45.3498	1.25175	549	421	95		51.5653	39.5055	8.92921		4.42999	Back Stutter	3.67897	Forward Stutter	6.8711	85	0.804185	0.592323	0.252104		0.00173468	0.00166203	0.00377454
2.8.0	10-5-1_800pg_Set 2 Amp 2_rep-626603	3	13812963	18893.3	44.7174	1.08606	558	416	101		51.8734	38.7001	9.42653		4.15544	Back Stutter	3.28028	Forward Stutter	7.73177	85	0.779313	0.569507	0.293219		0.00163495	0.00160044	0.00434132
2.8.0	10-5-1_800pg_Set 2 Amp 2_rep-655450	3	17564521	13032.1	46.4532	1.15008	546	407	95		52.1408	38.8179	9.04131		4.06287	Back Stutter	3.24601	Forward Stutter	5.67231	85	0.727376	0.52711	0.25248		0.00154923	0.00150259	0.0037934
2.8.0	10-5-1_800pg_Set 2 Amp 2_rep-803747	3	13854789	15165.8	44.7607	1.15792	546	419	96		51.4251	39.5271	9.0478		4.67257	Back Stutter	3.25092	Forward Stutter	5.73537	85	0.760413	0.540666	0.258685		0.00163625	0.00149624	0.00386936
2.8.0	10-5-1_800pg_Set 2 Amp 2_rep-874844	3	14544449	18409.3	46.1049	1.43614	552	410	97		52.1023	38.7599	9.13784		4.05784	Back Stutter	3.31611	Forward Stutter	6.31204	85	0.846668	0.594614	0.27179		0.00184645	0.00172165	0.00411758
2.8.0	10-5-1_800pg_Set 2 Amp 2_rep-887628	3	13474418	17996.7	44.0943	1.07879	546	408	93		52.1199	38.9897	8.8904		4.3512	Back Stutter	3.3116	Forward Stutter	6.03588	85	0.791431	0.535352	0.245338		0.00171749	0.00152417	0.0037396
2.8.0	10-5-1_800pg_Set 2 Amp 2_rep-952324	3	14323227	9859.13	45.4027	1.11769	551	412	96		52.041	38.8974	9.06167		3.809	Back Stutter	3.1528	Forward Stutter	5.92415	85	0.764148	0.606348	0.259992		0.00162161	0.0017509	0.00391449
2.8.0	10-5-1_800pg_Set 2 Amp 2_rep-960932	3	13547447	14942.8	45.8131	1.33453	534	404	90		51.9506	39.2475	8.80189		4.61275	Back Stutter	3.30203	Forward Stutter	5.80266	85	0.733083	0.487223	0.227417		0.00161281	0.00137788	0.00349127
2.8.0	100-100-4_1.28ng_Set 1 Amp 1	3	4546570	14924.7	41.071	1.06269	478	413	30		51.8934	44.8542	3.25239		3.58168	Back Stutter	4.63089	Forward Stutter	5.76037	90	0.886037	0.555227	0.0807918		0.0023176	0.00157109	0.00394898
2.8.0	100-100-4_1.28ng_Set 1 Amp 1_rep-142025	3	4597854	18372.9	38.6939	1.01636	470	409	33		51.597	44.8386	3.56442		3.53488	Back Stutter	4.61133	Forward Stutter	6.59489	90	0.859944	0.5455	0.101718		0.00227986	0.00155555	0.00494202
2.8.0	100-100-4_1.28ng_Set 1 Amp 1_rep-352888	3	5007389	13131.5	39.4184	1.07771	471	408	31		51.783	44.8414	3.3756		3.35828	Back Stutter	4.34949	Forward Stutter	7.19593	90	0.813537	0.522355	0.0853127		0.00211838	0.00147807	0.00410955
2.8.0	100-100-4_1.28ng_Set 1 Amp 1_rep-427489	3	4513668	19821.8	39.9437	1.04341	484	418	30		51.9049	44.8868	3.20827		3.3115	Back Stutter	4.38362	Forward Stutter	7.07007	90	0.962163	0.63002	0.0807902		0.00254437	0.00180185	0.00394745
2.8.0	100-100-4_1.28ng_Set 1 Amp 1_rep-461405	3	3922160	21179.6	38.4251	1.03387	489	419	30		52.0871	44.6693	3.24363		3.2783	Back Stutter	4.49864	Forward Stutter	7.11561	90	0.935492	0.590599	0.0870726		0.00240737	0.00164854	0.00442271
2.8.0	100-100-4_1.28ng_Set 1 Amp 1_rep-490152	3	5681645	15706.5	38.115	1.03406	481	416	29		51.9531	44.8599	3.18704		3.14795	Back Stutter	4.33754	Forward Stutter	5.71657	90	0.904348	0.576589	0.0804376		0.00236239	0.00162766	0.00409366
2.8.0	100-100-4_1.28ng_Set 1 Amp 1_rep-615760	3	4929314	14221.7	39.1475	1.03281	471	407	30		51.8729	44.8309	3.29623		3.35211	Back Stutter	5.12039	Forward Stutter	5.64795	90	0.819067	0.510386	0.0797914		0.00214051	0.00144857	0.00383431
2.8.0	100-100-4_1.28ng_Set 1 Amp 1_rep-635225	3	4570045	16320.4	37.7935	1.07209	486	419	31		51.8636	44.7887	3.34769		3.45923	Back Stutter	4.50674	Forward Stutter	5.76962	90	0.888754	0.547643	0.0870098		0.00229117	0.00152534	0.00411196
2.8.0	100-100-4_1.28ng_Set 1 Amp 1_rep-758494	3	5349815	15533.1	39.3799	1.04245	483	418	32		51.7955	44.8158	3.38872		3.45326	Back Stutter	4.36774	Forward Stutter	6.8231	90	0.84312	0.520144	0.0909034		0.00214621	0.00143435	0.00428301
2.8.0	100-100-4_1.28ng_Set 1 Amp 1_rep-827018	3	4677886	9441.76	39.156	1.12369	472	412	30		51.6661	45.0482	3.28574		3.3968	Back Stutter	4.80643	Forward Stutter	5.20502	90	0.856454	0.559186	0.0793171		0.00224841	0.00157908	0.00385914
2.8.0	100-100-4_1.28ng_Set 1 Amp 1_rep-856697	3	4751983	18067.7	37.8583	1.0857	485	417	32		51.8891	44.693	3.41785		3.30134	Back Stutter	4.02764	Forward Stutter	5.57119	90	0.920114	0.556756	0.0908496		0.00238958	0.00155213	0.00423106
2.8.0	100-100-4_1.28ng_Set 1 Amp 2_rep-142025	3	9769443	16755	48.3416	1.09155	593	525	38		51.3376	45.3893	3.27313		3.27704	Back Stutter	3.002	Forward Stutter	5.82504	85	0.746224	0.555286	0.0839967		0.0014602	0.00118866	0.0029129
2.8.0	100-100-4_1.28ng_Set 1 Amp 2_rep-352888	3	8987902	18824.3	48.5083	1.09749	596	525	40		51.314	45.2103	3.47569		3.41471	Back Stutter	2.99625	Forward Stutter	5.68612	85	0.766946	0.590449	0.100197		0.00149389	0.00127489	0.00340898
2.8.0	100-100-4_1.28ng_Set 1 Amp 2_rep-427489	3	10240850	12769.5	47.0176	1.02999	594	527	38		51.2249	45.4765	3.29858		3.2501	Back Stutter	3.20308	Forward Stutter	5.67166	85	0.73956	0.527137	0.086063		0.00143603	0.00111887	0.00296667
2.8.0	100-100-4_1.28ng_Set 1 Amp 2_rep-461405	3	10178753	22039.4	48.8599	1.04233	602	534	36		51.3607	45.5325	3.1068		3.47968	Back Stutter	3.31301	Forward Stutter	5.58226	85	0.827269	0.555417	0.0756911		0.00161371	0.0011689	0.00268257
2.8.0	100-100-4_1.28ng_Set 1 Amp 2_rep-490152	3	9851616	12091.2	48.4182	1.06443	587	518	39		51.3096	45.3016	3.38887		3.27888	Back Stutter	3.49734	Forward Stutter	5.95394	85	0.825581	0.528697	0.0945949		0.00165676	0.00114446	0.00330502
2.8.0	100-100-4_1.28ng_Set 1 Amp 2_rep-615760	3	9896323	15567.7	47.1872	1.09036	597	529	38		51.3148	45.4199	3.26533		3.57682	Back Stutter	3.42557	Forward Stutter	5.25822	85	0.827953	0.579769	0.088874		0.00162509	0.00124047	0.00312734
2.8.0	100-100-4_1.28ng_Set 1 Amp 2_rep-635225	3	8850936	19329.5	46.9605	1.12633	584	515	39		51.3059	45.2858	3.40825		3.59903	Back Stutter	3.35539	Forward Stutter	5.98197	85	0.824859	0.516614	0.0957247		0.0016687	0.00112691	0.00337067
2.8.0	100-100-4_1.28ng_Set 1 Amp 2_rep-758494	3	9318259	18724.6	47.0476	1.12467	589	523	38		51.2613	45.4746	3.2641		3.67038	Back Stutter	3.28262	Forward Stutter	6.55484	85	0.740261	0.534565	0.0851933		0.00145006	0.00114497	0.0029997
2.8.0	100-100-4_1.28ng_Set 1 Amp 2_rep-827018	3	8775175	11417.8	47.5162	1.04625	603	534	39		51.2763	45.4103	3.31339		3.48227	Back Stutter	3.41314	Forward Stutter	4.6184	85	0.797015	0.542238	0.0914612		0.00153886	0.00113861	0.003164
2.8.0	100-100-4_1.28ng_Set 1 Amp 2_rep-856697	3	9474257	13560.2	47.5946	1.03134	587	520	37		51.312	45.4796	3.20838		3.4914	Back Stutter	3.33381	Forward Stutter	6.56058	85	0.750699	0.529034	0.0801832		0.00147751	0.00114007	0.00285964
2.8.0	100-100-4_325ng_Set 1 Amp 1_rep-142025	3	7305511	13118.8	21.071	1.05965	152	118	28		50.9962	39.716	9.28778		2.96202	Back Stutter	8.79008	Forward Stutter	5.30099	90	0.328883	0.199731	0.0625996		0.00281697	0.00214586	0.00396751
2.8.0	100-100-4_325ng_Set 1 Amp 1_rep-352888	3	8101629	15960.9	22.1163	1.15727	150	117	29		50.7559	39.4365	9.80759		2.85254	Back Stutter	8.37956	Forward Stutter	6.52848	90	0.328389	0.17217	0.0665325		0.00291989	0.00178474	0.00370809
2.8.0	100-100-4_325ng_Set 1 Amp 1_rep-427489	3	8231101	8915	23.0426	1.04485	151	118	25		51.4247	40.1201	8.45528		2.67797	Back Stutter	8.08224	Forward Stutter	5.44756	90	0.315555	0.16284	0.0755919		0.00275214	0.00162628	0.00597536
2.8.0	100-100-4_325ng_Set 1 Amp 1_rep-461405	3	7766176	12056.2	21.7459	1.08722	152	121	23		51.3677	40.9793	7.65299		2.77192	Back Stutter	7.83731	Forward Stutter	6.37062	90	0.314005	0.174208	0.0680156		0.00266976	0.0016961	0.00482032
2.8.0	100-100-4_325ng_Set 1 Amp 1_rep-490152	3	8006306	11778.4	21.6263	1.11253	149	115	27		51.2472	39.6515	9.1013		2.70365	Back Stutter	9.13123	Forward Stutter	5.92019	90	0.335599	0.182287	0.0692899		0.00302585	0.00192012	0.00410075
2.8.0	100-100-4_325ng_Set 1 Amp 1_rep-615760	3	7467403	20300.2	22.1072	1.13995	150	117	27		51.0318	39.957	9.01123		2.55687	Back Stutter	10.0743	Forward Stutter	6.24449	90	0.339894	0.194153	0.0755599		0.0030464	0.00204585	0.00472767
2.8.0	100-100-4_325ng_Set 1 Amp 1_rep-635225	3	8629262	12893.6	20.9959	1.15101	149	117	29		50.5934	39.6274	9.77914		2.91524	Back Stutter	11.3843	Forward Stutter	6.59388	90	0.324975	0.180463	0.0603141		0.00288819	0.0018787	0.00327037
2.8.0	100-100-4_325ng_Set 1 Amp 1_rep-758494	3	7521357	11551.5	20.0689	1.16047	150	117	22		51.8553	40.5666	7.57815		2.84357	Back Stutter	8.82725	Forward Stutter	6.8432	90	0.341254	0.189671	0.0547445		0.00311314	0.00199952	0.00415667
2.8.0	100-100-4_325ng_Set 1 Amp 1_rep-827018	3	7394252	15688.9	20.9031	1.06831	148	115	22		51.7388	40.5094	7.75182		2.68968	Back Stutter	7.58542	Forward Stutter	6.45123	90	0.306882	0.151541	0.0660682		0.00270618	0.00152894	0.00505747
2.8.0	100-100-4_325ng_Set 1 Amp 1_rep-856697	3	8755599	14552.2	20.2524	1.03778	150	117	29		50.5846	39.5294	9.88591		3.03167	Back Stutter	8.31639	Forward Stutter	5.12708	90	0.331765	0.175182	0.0667043		0.00298014	0.00180874	0.00392563
2.8.0	100-100-4_325ng_Set 1 Amp 2_rep-142025	3	10325941	16074.5	23.7682	1.05027	159	128	24		51.1774	41.2437	7.5789		2.41528	Back Stutter	6.53157	Forward Stutter	7.25691	90	0.297709	0.161373	0.0664768		0.00235506	0.00144822	0.00426912
2.8.0	100-100-4_325ng_Set 1 Amp 2_rep-352888	3	11676451	20421.9	24.5701	1.03614	166	132	27		51.1034	40.6731	8.2235		2.43933	Back Stutter	6.73664	Forward Stutter	8.39115	90	0.360853	0.184461	0.0805534		0.00284795	0.00163097	0.00482983
2.8.0	100-100-4_325ng_Set 1 Amp 2_rep-427489	3	10083336	18880.8	24.6513	1.04065	162	129	26		51.03	40.7705	8.19954		2.35357	Back Stutter	7.92493	Forward Stutter	5.68023	90	0.328953	0.167445	0.0861429		0.00260267	0.00149464	0.0055129
2.8.0	100-100-4_325ng_Set 1 Amp 2_rep-461405	3	9375774	8215.84	25.6827	1.07106	162	129	23		51.4166	41.1597	7.42372		2.4639	Back Stutter	6.23672	Forward Stutter	5.60658	90	0.326166	0.179852	0.0702361		0.00259149	0.00163037	0.00480924
2.8.0	100-100-4_325ng_Set 1 Amp 2_rep-490152	3	8291901	15144.9	24.6697	1.06428	161	129	22		51.6169	41.2884	7.09471		2.66738	Back Stutter	6.43003	Forward Stutter	4.93544	90	0.333938	0.184541	0.0626554		0.00268223	0.00169077	0.00435086
2.8.0	100-100-4_325ng_Set 1 Amp 2_rep-615760	3	12972254	22982	24.1081	1.00981	162	128	27		51.0959	40.3572	8.54689		2.45499	Back Stutter	8.40643	Forward Stutter	5.20919	90	0.343125	0.176111	0.0821226		0.00275001	0.00160726	0.00465041
2.8.0	100-100-4_325ng_Set 1 Amp 2_rep-635225	3	12383598	16444	25.0083	1.0992	165	129	26		51.5021	40.4733	8.02463		2.55583	Back Stutter	9.96821	Forward Stutter	6.02205	90	0.366147	0.17436	0.0746994		0.00295626	0.00157967	0.00452179
2.8.0	100-100-4_325ng_Set 1 Amp 2_rep-758494	3	9496634	14175.9	24.8198	1.04403	166	131	24		51.6172	40.8419	7.54088		2.44554	Back Stutter	10.0706	Forward Stutter	6.21923	90	0.374036	0.187826	0.0658029		0.00298986	0.00168733	0.00393075
2.8.0	100-100-4_325ng_Set 1 Amp 2_rep-827018	3	12819725	10815	24.1007	1.08013	163	129	26		51.2518	40.6623	8.08593		2.55995	Back Stutter	7.57996	Forward Stutter	5.13922	90	0.331011	0.160563	0.0843849		0.00260985	0.00143004	0.0055203
2.8.0	100-100-4_325ng_Set 1 Amp 2_rep-856697	3	8422757	12427	24.9743	1.1615	159	126	24		51.3286	40.7807	7.89073		2.64426	Back Stutter	9.81256	Forward Stutter	7.21164	90	0.33646	0.171976	0.0713429		0.00275149	0.00158784	0.00457983
2.8.0	100-100-4_625ng_Set 1 Amp 1_rep-142025	3	6541985	19071	28.9033	1.04692	236	194	24		52.0284	42.6663	5.30529		2.65504	Back Stutter	9.20205	Forward Stutter	6.47692	89	0.398219	0.234466	0.0760899		0.00205435	0.00138394	0.00507465
2.8.0	100-100-4_625ng_Set 1 Amp 1_rep-352888	3	7567701	18133.4	29.0995	1.05143	234	191	25		51.983	42.5507	5.46636		2.64148	Back Stutter	7.10229	Forward Stutter	6.15593	89	0.395641	0.235546	0.0743066		0.00207097	0.00141983	0.00468606
2.8.0	100-100-4_625ng_Set 1 Amp 1_rep-427489	3	5078866	15344.1	28.3513	1.07462	234	193	24		51.8871	42.8259	5.28695		2.99556	Back Stutter	9.52998	Forward Stutter	6.98643	89	0.361814	0.212911	0.0824115		0.00185409	0.00124706	0.00593581
2.8.0	100-100-4_625ng_Set 1 Amp 1_rep-461405	3	6907815	8101.65	28.3912	1.0468	233	193	25		51.695	42.7838	5.52121		2.8288	Back Stutter	8.70965	Forward Stutter	4.48542	89	0.384896	0.228195	0.081142		0.00200928	0.0013574	0.00538542
2.8.0	100-100-4_625ng_Set 1 Amp 1_rep-490152	3	6341350	12319.4	29.297	1.03791	235	194	23		52.0049	42.8265	5.1686		2.84914	Back Stutter	10.8015	Forward Stutter	8.12512	89	0.402639	0.234884	0.0727762		0.00209876	0.00139062	0.00488797
2.8.0	100-100-4_625ng_Set 1 Amp 1_rep-615760	3	5878297	17505.7	29.2611	1.06498	236	197	24		51.5914	43.1306	5.278		2.7849	Back Stutter	10.4157	Forward Stutter	5.0673	89	0.367715	0.247845	0.0749506		0.00186652	0.0014477	0.00486123
2.8.0	100-100-4_625ng_Set 1 Amp 1_rep-635225	3	5006546	12101.6	29.1256	1.04256	243	199	27		51.767	42.4417	5.79134		2.74	Back Stutter	7.31538	Forward Stutter	5.91136	89	0.44942	0.270106	0.094176		0.00231639	0.00158805	0.00592223
2.8.0	100-100-4_625ng_Set 1 Amp 1_rep-758494	3	6760769	17100.4	29.4451	1.06204	232	191	25		51.7437	42.616	5.64024		2.81169	Back Stutter	7.45477	Forward Stutter	5.67308	89	0.392657	0.231969	0.0886593		0.00206892	0.00139914	0.00608157
2.8.0	100-100-4_625ng_Set 1 Amp 1_rep-827018	3	6232828	23613.1	29.1287	1.04029	235	193	24		51.8877	42.709	5.40334		2.64233	Back Stutter	7.75232	Forward Stutter	5.62404	89	0.39837	0.245098	0.0762836		0.0020731	0.0014625	0.00498772
2.8.0	100-100-4_625ng_Set 1 Amp 1_rep-856697	3	6660696	11437.9	29.6011	1.02597	235	193	27		51.6764	42.4727	5.85089		2.57949	Back Stutter	7.43519	Forward Stutter	5.71479	89	0.381908	0.236455	0.0914312		0.00196964	0.00140932	0.00589661
2.8.0	100-100-4_625ng_Set 1 Amp 2_rep-142025	3	6930484	13982.3	30.5429	1.06772	306	205	40		55.5493	37.1973	7.25336		3.73787	Back Stutter	5.61644	Forward Stutter	6.26777	90	0.59064	0.221377	0.149435		0.00244439	0.00121779	0.00696048
2.8.0	100-100-4_625ng_Set 1 Amp 2_rep-352888	3	7772275	12998.3	27.9325	1.08992	302	197	35		56.5385	36.9228	6.53872		3.83421	Back Stutter	5.40783	Forward Stutter	7.41225	90	0.63823	0.213957	0.114567		0.00275343	0.0012146	0.00543848
2.8.0	100-100-4_625ng_Set 1 Amp 2_rep-427489	3	6501275	29169.5	28.6376	1.13813	307	200	37		56.4483	36.722	6.82973		3.54792	Back Stutter	5.86579	Forward Stutter	5.45184	90	0.585554	0.196678	0.129829		0.00240356	0.00109437	0.00597519
2.8.0	100-100-4_625ng_Set 1 Amp 2_rep-461405	3	8918911	11992.5	28.5194	1.16436	299	196	37		56.1769	36.8337	6.98942		3.66194	Back Stutter	5.1322	Forward Stutter	7.83786	90	0.554014	0.200319	0.131678		0.00231202	0.00114085	0.00623484
2.8.0	100-100-4_625ng_Set 1 Amp 2_rep-490152	3	8263865	16990	28.6793	1.04091	310	203	40		56.1214	36.6663	7.21234		3.77715	Back Stutter	6.01971	Forward Stutter	5.48285	90	0.637806	0.20518	0.145307		0.00264875	0.00113512	0.00658828
2.8.0	100-100-4_625ng_Set 1 Amp 2_rep-615760	3	7032003	12154.7	28.7669	1.16006	298	196	35		56.2792	37.0965	6.62428		3.84272	Back Stutter	5.34099	Forward Stutter	6.91269	90	0.615407	0.224485	0.11942		0.00266565	0.00130033	0.00575989
2.8.0	100-100-4_625ng_Set 1 Amp 2_rep-635225	3	6766887	16743.7	29.092	1.09039	303	200	39		55.8714	36.8614	7.26717		3.5193	Back Stutter	5.70503	Forward Stutter	5.67707	90	0.624467	0.240749	0.144427		0.00266412	0.00137695	0.00660664
2.8.0	100-100-4_625ng_Set 1 Amp 2_rep-758494	3	7608218	16452.1	29.4133	1.06338	297	199	36		55.8427	37.329	6.82823		3.80558	Back Stutter	5.1611	Forward Stutter	6.38193	90	0.543306	0.210229	0.124922		0.00227901	0.00118941	0.00587215
2.8.0	100-100-4_625ng_Set 1 Amp 2_rep-827018	3	8848273	11140.5	29.0864	1.02995	305	197	41		56.233	36.264	7.5029		3.46424	Back Stutter	5.40227	Forward Stutter	5.7518	90	0.595209	0.201107	0.152147		0.00246236	0.00114471	0.00697614
2.8.0	100-100-4_625ng_Set 1 Amp 2_rep-856697	3	5847162	17192.7	27.8183	1.0308	295	194	36		56.1203	36.9617	6.91798		3.62792	Back Stutter	8.64635	Forward Stutter	7.20052	90	0.554575	0.196707	0.125696		0.0023651	0.00113962	0.00599967
2.8.0	100-100-4_1.28ng_Set 2 Amp 1_rep-35262	3	4204539	17535	46.4909	1.03752	498	446	14		52.0377	46.5196	1.44274		2.7277	Back Stutter	4.33789	Forward Stutter	5.52456	85	0.726873	0.515621	0.0423433		0.00172935	0.00131935	0.00476677
2.8.0	100-100-4_1.28ng_Set 2 Amp 1_rep-104565	3	3633069	11707.5	45.9305	1.08176	524	467	16		52.0043	46.4264	1.56931		2.73418	Back Stutter	4.43371	Forward Stutter	6.21521	85	0.889213	0.569031	0.0563408		0.00208094	0.00140103	0.00629208
2.8.0	100-100-4_1.28ng_Set 2 Amp 1_rep-562810	3	3882336	14065.8	45.7334	1.08604	505	452	14		52.0417	46.524	1.43434		2.62571	Back Stutter	4.78154	Forward Stutter	5.09818	85	0.743127	0.597544	0.0439594		0.00173656	0.001541	0.00501402
2.8.0	100-100-4_1.28ng_Set 2 Amp 1_rep-626603	3	4059311	17871.6	45.3383	1.06063	509	453	13		52.1817	46.463	1.3553		2.78674	Back Stutter	5.54731	Forward Stutter	5.24981	85	0.766016	0.538989	0.0377181		0.00180065	0.00135793	0.00427353
2.8.0	100-100-4_1.28ng_Set 2 Amp 1_rep-655450	3	3719521	13088.7	46.7701	1.02074	517	462	15		52.0393	46.4728	1.48793		2.74761	Back Stutter	4.6687	Forward Stutter	5.46882	85	0.842498	0.616236	0.0480879		0.0019633	0.00154238	0.00526542
2.8.0	100-100-4_1.28ng_Set 2 Amp 1_rep-803747	3	4249513	15201.1	46.3924	1.04982	507	452	14		52.0819	46.4541	1.46401		2.69649	Back Stutter	4.39066	Forward Stutter	6.7514	85	0.750362	0.592321	0.044497		0.00175562	0.00152357	0.0048604
2.8.0	100-100-4_1.28ng_Set 2 Amp 1_rep-874844	3	3566605	19948.1	46.2365	1.12707	510	454	14		52.1507	46.4136	1.43575		2.92939	Back Stutter	4.92259	Forward Stutter	7.00428	85	0.814875	0.59039	0.0442235		0.00194067	0.00150932	0.00503021
2.8.0	100-100-4_1.28ng_Set 2 Amp 1_rep-887628	3	3616240	15499.3	46.0837	1.07159	503	448	13		52.1794	46.4513	1.36934		2.78009	Back Stutter	4.94865	Forward Stutter	5.93467	85	0.739456	0.555959	0.0382248		0.00174798	0.0014346	0.00437011
2.8.0	100-100-4_1.28ng_Set 2 Amp 1_rep-952324	3	4171983	20245.8	46.2398	1.09018	508	454	14		52.0507	46.5301	1.41916		2.89394	Back Stutter	4.83566	Forward Stutter	5.61017	85	0.754138	0.528693	0.0436369		0.00175687	0.00132909	0.00492299
2.8.0	100-100-4_1.28ng_Set 2 Amp 1_rep-960932	3	3957418	19979.2	46.6567	1.05248	523	467	15		52.0735	46.4687	1.45776		2.7892	Back Stutter	4.45511	Forward Stutter	5.4088	85	0.820793	0.626439	0.0451901		0.00188864	0.0015659	0.00479096
2.8.0	100-100-4_1.28ng_Set 2 Amp 2_rep-35262	3	7439157	12931.1	53.3468	1.05892	842	753	37		51.5927	46.1426	2.26467		4.04607	Back Stutter	6.65355	Forward Stutter	4.2936	85	1.04209	0.760492	0.108613		0.00142276	0.001135	0.00572892
2.8.0	100-100-4_1.28ng_Set 2 Amp 2_rep-104565	3	9983315	21979	54.764	1.20065	828	726	80		50.662	44.4688	4.8692		3.47708	Back Stutter	7.01636	Forward Stutter	4.56456	85	0.846995	0.804034	0.19341		0.00114587	0.00126475	0.00507998
2.8.0	100-100-4_1.28ng_Set 2 Amp 2_rep-562810	3	8014951	8626.39	54.0747	1.05827	838	752	31		51.6804	46.4031	1.91652		3.70088	Back Stutter	6.67351	Forward Stutter	4.88099	85	1.05019	0.715679	0.103209		0.00144769	0.0010633	0.00564759
2.8.0	100-100-4_1.28ng_Set 2 Amp 2_rep-626603	3	8161577	15756.9	54.7992	1.10389	853	771	23		51.7906	46.8448	1.36464		3.7404	Back Stutter	6.85218	Forward Stutter	7.06411	85	1.10825	0.808867	0.0766949		0.00151347	0.00117484	0.00574919
2.8.0	100-100-4_1.28ng_Set 2 Amp 2_rep-655450	3	8399057	15851.5	55.0333	1.02927	834	740	60		51.0721	45.3683	3.55968		3.4855	Back Stutter	6.55207	Forward Stutter	5.01868	85	1.04319	0.888165	0.13309		0.0014373	0.00138183	0.00478978
2.8.0	100-100-4_1.28ng_Set 2 Amp 2_rep-803747	3	8194008	10767.3	53.2816	1.17792	844	735	64		51.4123	44.757	3.8307		3.84494	Back Stutter	6.50487	Forward Stutter	4.36321	85	1.10299	0.692263	0.109483		0.00151546	0.00107632	0.0045239
2.8.0	100-100-4_1.28ng_Set 2 Amp 2_rep-874844	3	8187414	21005.1	54.0795	1.03619	850	764	27		51.7841	46.5758	1.64013		3.68337	Back Stutter	6.39752	Forward Stutter	4.20117	85	1.13363	0.772648	0.0935343		0.00155419	0.00112733	0.00612389
2.8.0	100-100-4_1.28ng_Set 2 Amp 2_rep-887628	3	7760154	28401.4	53.6023	1.14896	827	744	22		51.8916	46.712	1.39639		3.97283	Back Stutter	6.56005	Forward Stutter	5.39324	85	0.97201	0.72787	0.0776641		0.00133825	0.00108604	0.00602896
2.8.0	100-100-4_1.28ng_Set 2 Amp 2_rep-952324	3	7316202	9328.54	51.653	1.08001	852	769	22		51.8461	46.8366	1.31723		4.20809	Back Stutter	6.44399	Forward Stutter	7.57519	85	1.19753	0.731192	0.0703085		0.00165426	0.00106039	0.00525356
2.8.0	100-100-4_1.28ng_Set 2 Amp 2_rep-960932	3	8123466	18676.9	53.1055	1.08557	847	763	20		51.9711	46.7766	1.25222		4.11374	Back Stutter	6.78828	Forward Stutter	5.83728	85	1.17494	0.702319	0.063847		0.00162898	0.00101912	0.00493425
2.8.0	100-100-4_325ng_Set 2 Amp 1_rep-35262	3	6742711	12476.3	28.4887	1.05677	212	180	18		51.7109	43.9491	4.33996		2.4456	Back Stutter	9.30308	Forward Stutter	7.06089	85	0.328608	0.187926	0.0592257		0.00185975	0.00117528	0.00564347
2.8.0	100-100-4_325ng_Set 2 Amp 1_rep-104565	3	7797598	10214	28.3164	1.02849	212	180	17		51.7277	44.0374	4.23492		2.41245	Back Stutter	8.8244	Forward Stutter	5.80659	85	0.319364	0.180676	0.0561005		0.00179228	0.0011159	0.0053018
2.8.0	100-100-4_325ng_Set 2 Amp 1_rep-562810	3	5219799	21388.8	27.0536	1.06326	212	180	17		51.851	43.9908	4.15826		2.46079	Back Stutter	8.59173	Forward Stutter	5.78311	85	0.333827	0.191394	0.0601388		0.00188607	0.00119193	0.00630317
2.8.0	100-100-4_325ng_Set 2 Amp 1_rep-626603	3	6731600	11382	28.4371	1.08469	205	176	17		51.5609	44.1849	4.25424		2.37632	Back Stutter	7.57048	Forward Stutter	4.3129	85	0.282231	0.162375	0.0542843		0.00161787	0.00102575	0.0052487
2.8.0	100-100-4_325ng_Set 2 Amp 1_rep-655450	3	6204273	12884.1	27.9037	1.02302	211	181	17		51.6325	44.274	4.09343		2.3776	Back Stutter	6.76987	Forward Stutter	6.65299	85	0.320465	0.189954	0.0533688		0.00181256	0.0011788	0.00522089
2.8.0	100-100-4_325ng_Set 2 Amp 1_rep-803747	3	7119345	19028.3	27.8962	1.08816	210	178	17		51.8694	44.0214	4.10924		2.3791	Back Stutter	13.1448	Forward Stutter	6.87315	85	0.30279	0.164478	0.0452603		0.00170365	0.00102158	0.0039924
2.8.0	100-100-4_325ng_Set 2 Amp 1_rep-874844	3	6313099	3931.14	29.2921	1.03756	212	181	17		51.6783	44.2102	4.11149		2.42035	Back Stutter	5.98164	Forward Stutter	6.24981	85	0.313878	0.185221	0.0529072		0.00176044	0.00114504	0.00511008
2.8.0	100-100-4_325ng_Set 2 Amp 1_rep-887628	3	6043510	8148.5	28.7495	1.0267	207	176	16		51.7646	44.2477	3.98772		2.41809	Back Stutter	9.53712	Forward Stutter	7.47694	85	0.292145	0.160579	0.0484916		0.00165986	0.00100349	0.00485305
2.8.0	100-100-4_325ng_Set 2 Amp 1_rep-952324	3	5880259	14964.1	28.0518	1.02164	211	180	17		51.7816	44.1423	4.07608		2.35647	Back Stutter	6.06572	Forward Stutter	6.24463	85	0.329758	0.193365	0.0517057		0.00187015	0.00121142	0.00495658
2.8.0	100-100-4_325ng_Set 2 Amp 1_rep-960932	3	6872838	17174.9	28.7321	1.05276	211	179	17		51.8269	43.9942	4.17889		2.3734	Back Stutter	6.37889	Forward Stutter	6.26039	85	0.312681	0.171239	0.0471593		0.00176025	0.00106239	0.00424135
2.8.0	100-100-4_325ng_Set 2 Amp 2_rep-35262	3	7250551	10800.8	36.51	1.09335	349	284	26		52.9877	43.1059	3.90647		3.02535	Back Stutter	7.50087	Forward Stutter	4.57827	85	0.434375	0.398789	0.0714719		0.00153857	0.00169154	0.00403329
2.8.0	100-100-4_325ng_Set 2 Amp 2_rep-104565	3	6297965	7586.37	37.8103	1.08732	342	278	25		53.0298	43.0266	3.9436		2.61577	Back Stutter	6.79269	Forward Stutter	6.70536	85	0.370465	0.453621	0.0704482		0.00128763	0.00202431	0.00408801
2.8.0	100-100-4_325ng_Set 2 Amp 2_rep-562810	3	5824432	13255.7	35.3344	1.10903	351	288	29		52.593	43.1135	4.29357		2.8689	Back Stutter	5.93301	Forward Stutter	5.17778	85	0.540951	0.424828	0.0886849		0.00198019	0.00181058	0.00480531
2.8.0	100-100-4_325ng_Set 2 Amp 2_rep-626603	3	7441949	12247.7	37.4458	1.12853	347	281	26		53.0062	42.9855	4.00832		2.64301	Back Stutter	7.6624	Forward Stutter	5.89054	85	0.344427	0.449928	0.0728735		0.00112741	0.0019636	0.00408026
2.8.0	100-100-4_325ng_Set 2 Amp 2_rep-655450	3	6814073	15370.7	36.6244	1.09134	356	296	28		52.3872	43.5053	4.10748		2.91081	Back Stutter	6.286	Forward Stutter	6.4031	85	0.62569	0.366512	0.0815846		0.00231629	0.00147666	0.00443282
2.8.0	100-100-4_325ng_Set 2 Amp 2_rep-803747	3	7407098	9833.6	35.7152	1.02196	368	310	27		52.2275	43.9383	3.8342		2.90886	Back Stutter	8.45147	Forward Stutter	5.72646	85	0.762441	0.295943	0.0756263		0.0027439	0.00111549	0.00401315
2.8.0	100-100-4_325ng_Set 2 Amp 2_rep-874844	3	6624101	10505.7	36.2127	1.11441	351	287	28		52.681	43.085	4.23396		3.01424	Back Stutter	7.26378	Forward Stutter	5.94266	85	0.547423	0.350319	0.0868109		0.00193773	0.00145138	0.00481598
2.8.0	100-100-4_325ng_Set 2 Amp 2_rep-887628	3	7712008	8409.34	35.6327	1.11018	352	284	26		53.2072	42.8954	3.89732		2.84527	Back Stutter	8.29559	Forward Stutter	5.7017	85	0.332597	0.447127	0.0702725		0.00106881	0.0019194	0.00396908
2.8.0	100-100-4_325ng_Set 2 Amp 2_rep-952324	3	7317664	17448.4	36.4736	1.07786	347	282	27		52.8354	42.9948	4.16976		2.54885	Back Stutter	6.74957	Forward Stutter	4.41938	85	0.293162	0.493161	0.0777116		0.000944176	0.00215207	0.00418556
2.8.0	100-100-4_325ng_Set 2 Amp 2_rep-960932	3	6224670	13896	36.7044	1.16695	349	287	28		52.578	43.1813	4.24073		3.13435	Back Stutter	6.3825	Forward Stutter	6.11255	85	0.434934	0.390697	0.085622		0.0014966	0.00165306	0.00465011
2.8.0	100-100-4_625ng_Set 2 Amp 1_rep-35262	3	6839918	12074	38.0963	1.02939	433	384	11		52.2954	46.3216	1.38297		2.98549	Back Stutter	5.94106	Forward Stutter	5.23673	85	0.680615	0.424148	0.0385546		0.00188541	0.00124956	0.00565304
2.8.0	100-100-4_625ng_Set 2 Amp 1_rep-104565	3	6481430	11317.1	39.6235	1.04115	421	373	12		52.2228	46.2601	1.51706		2.82717	Back Stutter	5.09681	Forward Stutter	5.04609	85	0.623058	0.380771	0.0452912		0.00175666	0.00114493	0.00682037
2.8.0	100-100-4_625ng_Set 2 Amp 1_rep-562810	3	6144014	11314	39.1856	1.04399	433	383	11		52.3694	46.3149	1.31572		2.95404	Back Stutter	7.21162	Forward Stutter	6.24474	85	0.703359	0.446523	0.0352206		0.00196636	0.00132822	0.0052605
2.8.0	100-100-4_625ng_Set 2 Amp 1_rep-626603	3	6283453	11464.6	39.6125	1.07679	428	381	11		52.1958	46.4454	1.35874		2.88869	Back Stutter	6.50914	Forward Stutter	5.60894	85	0.675081	0.440501	0.0354157		0.00189853	0.00131691	0.00508502
2.8.0	100-100-4_625ng_Set 2 Amp 1_rep-655450	3	6753073	16303.9	38.4943	1.02266	443	392	11		52.363	46.3339	1.30313		2.84169	Back Stutter	5.83263	Forward Stutter	4.99238	85	0.722307	0.465026	0.0348032		0.00197572	0.00135676	0.00505332
2.8.0	100-100-4_625ng_Set 2 Amp 1_rep-803747	3	7095572	12314.6	38.6117	1.00979	438	386	12		52.3869	46.2316	1.38157		2.69048	Back Stutter	6.29317	Forward Stutter	5.7234	85	0.71666	0.409477	0.0387404		0.00198345	0.00119058	0.00564298
2.8.0	100-100-4_625ng_Set 2 Amp 1_rep-874844	3	6583888	12922.9	39.1905	1.05142	436	385	12		52.3111	46.2858	1.40312		2.91557	Back Stutter	5.63541	Forward Stutter	6.47812	85	0.704329	0.407689	0.0396851		0.00195001	0.00119094	0.0058188
2.8.0	100-100-4_625ng_Set 2 Amp 1_rep-887628	3	7002198	19643.3	38.886	1.0382	427	376	11		52.4097	46.2533	1.33698		2.99157	Back Stutter	5.48543	Forward Stutter	6.81535	85	0.656213	0.373561	0.034574		0.00183722	0.00110496	0.00510249
2.8.0	100-100-4_625ng_Set 2 Amp 1_rep-952324	3	6466968	11288.8	39.9644	1.05434	421	373	11		52.3194	46.3367	1.34388		2.84596	Back Stutter	6.67189	Forward Stutter	6.78729	85	0.605053	0.352798	0.0343711		0.00169972	0.00105181	0.0052584
2.8.0	100-100-4_625ng_Set 2 Amp 1_rep-960932	3	6858562	14161.9	39.5623	1.05148	429	379	11		52.3104	46.3359	1.35369		2.94524	Back Stutter	5.59015	Forward Stutter	6.54593	85	0.64743	0.382996	0.0338618		0.00179625	0.00112478	0.00484974
2.8.0	100-100-4_625ng_Set 2 Amp 2_rep-35262	3	5044526	15149.6	33.1728	1.10194	405	327	11		54.4646	44.0059	1.52949		3.45307	Back Stutter	4.92395	Forward Stutter	5.6865	85	0.833984	0.290839	0.0365379		0.00266802	0.000989469	0.00519939
2.8.0	100-100-4_625ng_Set 2 Amp 2_rep-104565	3	4431793	12599.2	34.2932	1.06812	411	333	11		54.4118	44.1111	1.47711		3.35167	Back Stutter	4.48847	Forward Stutter	7.30066	85	0.905274	0.35639	0.0318134		0.00291472	0.00121657	0.00430319
2.8.0	100-100-4_625ng_Set 2 Amp 2_rep-562810	3	4623284	13972.3	32.0551	1.06065	404	329	12		54.2109	44.1575	1.63156		3.35585	Back Stutter	5.08872	Forward Stutter	6.57815	85	0.873294	0.346157	0.0428228		0.00284168	0.00118725	0.00611868
2.8.0	100-100-4_625ng_Set 2 Amp 2_rep-626603	3	4651753	13567.9	32.5954	1.06364	405	334	12		53.8884	44.4903	1.62136		3.62033	Back Stutter	4.97542	Forward Stutter	6.33075	85	0.809451	0.354136	0.0427143		0.00255347	0.0011913	0.00618106
2.8.0	100-100-4_625ng_Set 2 Amp 2_rep-655450	3	4476240	18309.2	32.3472	1.09749	418	336	12		54.5972	43.8732	1.52963		3.64127	Back Stutter	4.49445	Forward Stutter	5.76618	85	0.910977	0.324414	0.0388881		0.00286787	0.00107503	0.00554804
2.8.0	100-100-4_625ng_Set 2 Amp 2_rep-803747	3	4472070	11259.8	34.9787	1.12494	414	340	12		54.01	44.4052	1.58488		3.59425	Back Stutter	5.15241	Forward Stutter	5.66027	85	0.862657	0.34549	0.0418282		0.00269488	0.00113489	0.00605476
2.8.0	100-100-4_625ng_Set 2 Amp 2_rep-874844	3	4829298	16131	33.8999	1.08781	412	334	12		54.3476	44.0511	1.60126		3.4449	Back Stutter	6.60481	Forward Stutter	5.50256	85	0.865813	0.305813	0.0417351		0.0027448	0.00101354	0.00588555
2.8.0	100-100-4_625ng_Set 2 Amp 2_rep-887628	3	4546490	16673.1	32.7028	1.0335	415	339	12		54.1532	44.2933	1.55345		3.27615	Back Stutter	4.78559	Forward Stutter	7.29886	85	0.866567	0.388046	0.0397544		0.00269725	0.00130261	0.00557942
2.8.0	100-100-4_625ng_Set 2 Amp 2_rep-952324	3	5411134	17367.7	34.4028	1.09524	404	330	12		54.1873	44.2234	1.58931		3.20691	Back Stutter	4.85835	Forward Stutter	4.56624	85	0.813952	0.32274	0.0399748		0.0025862	0.00108866	0.0056393
2.8.0	100-100-4_625ng_Set 2 Amp 2_rep-960932	3	4358444	19828.5	34.2849	1.04495	403	327	11		54.3513	44.1044	1.54428		3.28274	Back Stutter	5.26801	Forward Stutter	5.87517	85	0.822815	0.318889	0.0367455		0.00263979	0.00109334	0.00516841
2.8.0	M2_1ng	1	2095804	6287.42	41.6287	1.19662	1125				100				3.22182	Back Stutter	5.37639	Forward Stutter	6.45145	86	1.05007				0.00103258
2.8.0	M2_1ng	1	1503144	6047.34	46.8045	1.07963	1145				100				2.59947	Back Stutter	3.87422	Forward Stutter	4.26543	85	0.786545				0.000737663
2.8.0	M2_2ng	1	2547326	5645.6	62.0573	1.05971	2270				100				2.64652	Back Stutter	5.27187	Forward Stutter	4.17887	85	1.52004				0.00071875
2.8.0	M2_2ng	1	2585720	6359.24	59.6413	1.05406	2391				100				2.55359	Back Stutter	7.65903	Forward Stutter	3.65406	85	1.56024				0.000700299
2.8.0	M2_4ng	1	3947809	5294.73	69.6568	1.17132	5858				100				3.54558	Back Stutter	9.95394	Forward Stutter	2.1857	86	3.08955				0.000556996
2.8.0	M2_4ng	1	3124011	8198.6	65.9945	1.08013	6687				100				4.26143	Back Stutter	10.879	Forward Stutter	1.96114	86	7.06587				0.00118892
2.8.0	M2_8ng	1	4052819	6020.16	70.6651	1.06756	9964				100				4.49107	Back Stutter	11.0038	Forward Stutter	3.24452	86	12.221				0.00141005
2.8.0	M2_8ng	1	5383981	5351.51	73.6698	1.05671	9638				100				2.71132	Back Stutter	10.0264	Forward Stutter	3.32773	86	11.7602				0.00139843
2.8.0	M2_63pg	1	1299879	448.6	-5.85831	1.18633	69				100				4.00611	Back Stutter	12.5788	Forward Stutter	5.23473	159	0.235105				0.00577491
2.8.0	M2_63pg	1	1759128	1057.27	-3.06967	1.13091	37				100				3.26255	Back Stutter	11.5592	Forward Stutter	6.68776	98	0.0358982				0.00113254
2.8.0	M2_63pg	1	2255286	1629.3	0.648331	1.18525	50				100				3.10958	Back Stutter	8.7163	Forward Stutter	4.95382	90	0.084806				0.00208768
2.8.0	M2_63pg	1	1704720	617.356	-4.03711	1.16616	66				100				3.74893	Back Stutter	9.3764	Forward Stutter	5.90362	97	0.0999855				0.00184283
2.8.0	M2_125pg	1	2772230	1306.93	5.57574	1.09474	71				100				3.12237	Back Stutter	6.90094	Forward Stutter	7.66244	97	0.0902251				0.00146446
2.8.0	M2_125pg	1	2996687	1775.59	5.26967	1.18175	64				100				2.48641	Back Stutter	9.72411	Forward Stutter	5.17089	90	0.0631869				0.00111579
2.8.0	M2_125pg	1	2454983	1753.41	4.15261	1.12412	69				100				2.63504	Back Stutter	8.11344	Forward Stutter	5.03762	90	0.0682362				0.0010916
2.8.0	M2_125pg	1	2887637	1758.96	4.85104	1.09362	79				100				2.78536	Back Stutter	7.65319	Forward Stutter	4.75709	90	0.0742736				0.00104049
2.8.0	M2_250pg	1	1499686	2063.64	13.6273	1.03869	189				100				2.59249	Back Stutter	8.85126	Forward Stutter	4.49891	90	0.239049				0.00145264
2.8.0	M2_250pg	1	2302233	1807.06	11.4668	1.05839	166				100				3.01686	Back Stutter	7.50828	Forward Stutter	6.45868	90	0.192863				0.00131887
2.8.0	M2_500pg	1	1651385	2529.31	18.697	1.16013	456				100				5.24094	Back Stutter	7.38686	Forward Stutter	4.91681	90	0.292866				0.000690319
2.8.0	M2_500pg	1	1690643	2060.41	19.9083	1.06667	487				100				3.98191	Back Stutter	9.38163	Forward Stutter	5.09784	90	0.372429				0.000829691
2.8.0	F2_1ng	1	1940962	3801.44	40.4374	1.17026	1418				100				4.79778	Back Stutter	6.25333	Forward Stutter	4.04465	81	1.05635				0.000810997
2.8.0	F2_1ng	1	2625207	6001.4	50.0847	1.05831	1505				100				3.15594	Back Stutter	5.20048	Forward Stutter	3.85272	81	1.30682				0.000955561
2.8.0	F2_2ng	1	2246289	6711	56.6583	1.02796	2993				100				2.48617	Back Stutter	6.8544	Forward Stutter	2.71703	81	3.00383				0.00111863
2.8.0	F2_2ng	1	2569277	9133.05	52.9267	1.07275	3040				100				2.67878	Back Stutter	10.2124	Forward Stutter	4.19458	81	3.38347				0.00125691
2.8.0	F2_4ng	1	3043308	5677.46	60.5798	1.04395	8123				100				4.75364	Back Stutter	12.2408	Forward Stutter	1.67855	81	8.82018				0.00122933
2.8.0	F2_4ng	1	3516478	5160.66	60.0737	1.06827	8298				100				5.21192	Back Stutter	21.2253	Forward Stutter	1.96438	81	6.69313				0.000879012
2.8.0	F2_8ng	1	4831389	6443.95	69.8285	1.13214	14121				100				4.9238	Back Stutter	17.2501	Forward Stutter	1.66758	81	16.7184				0.00134993
2.8.0	F2_63pg	1	1468035	212.552	-4.68039	1.09904	43				100				4.02006	Back Stutter	8.32769	Forward Stutter	5.90577	144	0.129763				0.00461499
2.8.0	F2_63pg	1	1792944	415.774	-3.43347	1.15101	46				100				3.67873	Back Stutter	7.97792	Forward Stutter	5.87583	112	0.0991177				0.0028277
2.8.0	F2_63pg	1	1761977	1933.02	-0.266252	1.12851	46				100				4.1404	Back Stutter	8.70565	Forward Stutter	6.36262	86	0.057852				0.00143168
2.8.0	F2_63pg	1	2094249	1823.14	-1.90152	1.23933	41				100				3.26596	Back Stutter	10.4172	Forward Stutter	5.70027	86	0.0727385				0.0021939
2.8.0	F2_125pg	1	3176872	2272.06	8.75033	1.14764	99				100				2.58143	Back Stutter	8.02638	Forward Stutter	6.43955	85	0.109128				0.00125835
2.8.0	F2_125pg	1	3563712	1250.24	6.68594	1.21918	87				100				3.22303	Back Stutter	10.5412	Forward Stutter	6.75686	85	0.0709825				0.000910865
2.8.0	F2_125pg	1	2786125	1658.12	8.1619	1.06692	93				100				2.47759	Back Stutter	10.4525	Forward Stutter	5.0595	86	0.0972415				0.00117944
2.8.0	F2_125pg	1	2808597	1469.26	4.37367	1.19253	91				100				4.28905	Back Stutter	8.75778	Forward Stutter	6.82939	86	0.0710665				0.000844779
2.8.0	F2_250pg	1	2823522	1607.67	14.9096	1.06203	185				100				2.66427	Back Stutter	9.06443	Forward Stutter	9.67121	85	0.153418				0.000908482
2.8.0	F2_250pg	1	2072603	1433.42	10.7891	1.04885	196				100				3.66345	Back Stutter	10.3956	Forward Stutter	5.26728	86	0.216361				0.0012449
2.8.0	F2_500pg	1	1991040	3813.69	26.1129	1.07678	609				100				3.74938	Back Stutter	3.91679	Forward Stutter	5.1967	86	0.595561				0.00109041
2.8.0	F2_500pg	1	1779836	5347.56	29.0235	1.23691	631				100				3.25236	Back Stutter	2.99957	Forward Stutter	7.64074	85	0.669478				0.00119695
2.8.0	F11_V_rep-37555	1	1188036	3272.96	39.0222	1.10529	1526				100				2.3286	Back Stutter	9.04183	Forward Stutter	4.89904	81	2.13261				0.00161301
2.8.0	F11_V_rep-145692	1	1412172	5491.46	39.2973	1.19114	1498				100				2.3515	Back Stutter	9.42542	Forward Stutter	5.78325	81	2.1191				0.00168632
2.8.0	F11_V_rep-230475	1	1424207	6436.5	39.3039	1.1714	1559				100				2.34044	Back Stutter	9.28348	Forward Stutter	4.31824	81	1.96903				0.00144575
2.8.0	F11_V_rep-253453	1	1221327	7320.12	39.0927	1.0559	1503				100				2.24955	Back Stutter	9.60067	Forward Stutter	6.034	81	1.69709				0.00127545
2.8.0	F11_V_rep-371121	1	1188261	5591	39.2143	1.0475	1529				100				2.31495	Back Stutter	9.10635	Forward Stutter	4.7042	81	1.86825				0.00141667
2.8.0	F11_V_rep-646333	1	1176379	5591.9	39.173	1.06427	1500				100				2.31564	Back Stutter	10.0563	Forward Stutter	4.22728	81	2.09352				0.00165177
2.8.0	F11_V_rep-807468	1	1178191	6854.88	39.2149	1.15413	1567				100				2.28502	Back Stutter	9.19135	Forward Stutter	4.89092	81	2.25695				0.00170902
2.8.0	F11_V_rep-847878	1	1191312	7264.34	39.2449	1.05197	1579				100				2.31651	Back Stutter	10.6096	Forward Stutter	4.71132	81	1.93728				0.00137641
2.8.0	F11_V_rep-854597	1	1204536	7612.63	39.2812	1.0788	1530				100				2.27467	Back Stutter	9.25056	Forward Stutter	4.54619	81	1.94386				0.00145479
2.8.0	F11_V_rep-867334	1	1218049	7785.54	39.2186	1.0263	1511				100				2.21075	Back Stutter	10.0396	Forward Stutter	4.06241	81	1.81349				0.0013802
2.8.0	M9_V_rep-37555	1	901999	4950.8	33.0188	1.15644	1360				100				3.29496	Back Stutter	14.8243	Forward Stutter	4.84245	86	1.84945				0.00162127
2.8.0	M9_V_rep-145692	1	922431	3398.63	32.4762	1.18026	1377				100				3.00257	Back Stutter	15.5545	Forward Stutter	4.54261	86	1.95534				0.00166844
2.8.0	M9_V_rep-230475	1	1086030	7859.06	32.218	1.23044	1299				100				3.2434	Back Stutter	14.2722	Forward Stutter	4.6615	86	1.60725				0.00141711
2.8.0	M9_V_rep-253453	1	946008	2979.64	32.9863	1.02853	1259				100				2.99931	Back Stutter	15.1786	Forward Stutter	4.98393	86	1.23353				0.00109163
2.8.0	M9_V_rep-371121	1	933444	5162.78	32.4904	1.09859	1393				100				3.10081	Back Stutter	15.3469	Forward Stutter	6.18123	86	1.71921				0.00141074
2.8.0	M9_V_rep-646333	1	908006	7011.43	32.4332	1.07328	1302				100				3.26363	Back Stutter	14.2463	Forward Stutter	4.81821	86	1.56343				0.00137126
2.8.0	M9_V_rep-807468	1	1066189	3986.51	32.5924	1.23641	1328				100				3.46323	Back Stutter	14.1526	Forward Stutter	5.03678	86	1.89467				0.00170694
2.8.0	M9_V_rep-847878	1	942709	3205.13	32.6796	1.12185	1303				100				3.17182	Back Stutter	13.9277	Forward Stutter	5.22936	86	1.34599				0.00115097
2.8.0	M9_V_rep-854597	1	1079853	7336.85	32.6898	1.15217	1325				100				3.37855	Back Stutter	14.9907	Forward Stutter	4.6434	86	1.7498				0.00153217
2.8.0	M9_V_rep-867334	1	923969	4795.4	32.8039	1.12724	1287				100				3.22778	Back Stutter	15.0452	Forward Stutter	4.18268	86	1.41361				0.00123306
2.8.0	F12_V_rep-37555	1	867347	4904.49	32.4531	1.11011	1072				100				3.35582	Back Stutter	4.51822	Forward Stutter	4.63289	85	1.55545				0.00172535
2.8.0	F12_V_rep-145692	1	878512	4566.5	32.1756	1.06117	1050				100				3.77412	Back Stutter	4.27988	Forward Stutter	7.34908	85	1.29855				0.00141688
2.8.0	F12_V_rep-230475	1	852216	3615.73	31.9035	1.12677	1029				100				3.84159	Back Stutter	4.41749	Forward Stutter	5.3567	85	1.38161				0.00156683
2.8.0	F12_V_rep-253453	1	860297	3634.98	32.0631	1.07512	1016				100				3.74361	Back Stutter	4.30837	Forward Stutter	4.04587	85	1.31315				0.00149916
2.8.0	F12_V_rep-371121	1	870387	4163.17	32.5184	1.12203	1048				100				3.64767	Back Stutter	4.45557	Forward Stutter	4.84646	85	1.37926				0.00152735
2.8.0	F12_V_rep-646333	1	843682	2969.12	32.2927	1.09063	1023				100				3.58178	Back Stutter	4.54842	Forward Stutter	4.99361	85	1.43353				0.00165171
2.8.0	F12_V_rep-807468	1	874103	2858.11	32.6691	1.06668	1055				100				3.26187	Back Stutter	4.51993	Forward Stutter	5.03811	85	1.49999				0.00167723
2.8.0	F12_V_rep-847878	1	883230	3569.66	32.5116	1.09374	1082				100				3.53451	Back Stutter	4.46562	Forward Stutter	6.42411	85	1.47909				0.00159123
2.8.0	F12_V_rep-854597	1	885825	5135.53	32.1725	1.03377	1025				100				3.33356	Back Stutter	4.59401	Forward Stutter	5.09189	85	1.25685				0.00140372
2.8.0	F12_V_rep-867334	1	885727	4192.33	32.5262	1.06674	1079				100				3.30964	Back Stutter	4.61182	Forward Stutter	5.00763	85	1.49654				0.00163128
2.8.0	F13_v_rep-37555	1	869361	2645.7	36.037	1.09303	1155				100				4.78455	Back Stutter	4.88203	Forward Stutter	5.5854	81	1.1229				0.00108033
2.8.0	F13_v_rep-145692	1	896039	4519.35	36.0454	1.1415	1131				100				4.39446	Back Stutter	4.90749	Forward Stutter	5.29448	81	0.922545				0.00089038
2.8.0	F13_v_rep-230475	1	1077909	3558.9	36.4377	1.2974	1114				100				4.08867	Back Stutter	4.84092	Forward Stutter	3.87493	81	0.909244				0.000892532
2.8.0	F13_v_rep-253453	1	928715	3591.62	35.7521	1.02782	1221				100				3.85934	Back Stutter	4.87624	Forward Stutter	4.88684	81	1.19714				0.00108539
2.8.0	F13_v_rep-371121	1	910980	4028.17	35.7811	1.03429	1191				100				4.135	Back Stutter	4.9282	Forward Stutter	4.90452	81	1.12626				0.00103845
2.8.0	F13_v_rep-646333	1	892722	3619.01	36.1213	1.06299	1157				100				4.21354	Back Stutter	5.054	Forward Stutter	4.95336	81	1.08668				0.00104072
2.8.0	F13_v_rep-807468	1	895891	4088.06	35.687	1.10634	1153				100				4.25648	Back Stutter	5.11065	Forward Stutter	3.94317	81	1.04729				0.00100604
2.8.0	F13_v_rep-847878	1	891976	3775.75	35.7072	1.1676	1162				100				4.48401	Back Stutter	4.91672	Forward Stutter	7.34562	81	1.06594				0.00101403
2.8.0	F13_v_rep-854597	1	901410	2634.88	36.1105	1.14741	1184				100				4.17452	Back Stutter	4.86489	Forward Stutter	4.77784	81	1.16932				0.00109726
2.8.0	F13_v_rep-867334	1	852990	3403.15	36.2666	1.18771	1110				100				4.3424	Back Stutter	4.92728	Forward Stutter	5.41768	81	1.15616				0.00117972
2.8.0	F14_v_rep-37555	1	1022671	6373.05	40.6557	1.16852	1521				100				2.52385	Back Stutter	8.25401	Forward Stutter	5.70419	86	1.96331				0.00148227
2.8.0	F14_v_rep-145692	1	1055482	4332.31	40.1421	1.08372	1452				100				2.56468	Back Stutter	7.62783	Forward Stutter	4.04828	86	1.42946				0.00109132
2.8.0	F14_v_rep-230475	1	1063585	7746.58	40.4368	1.08638	1591				100				2.43385	Back Stutter	8.04993	Forward Stutter	4.34379	86	1.7808				0.00127472
2.8.0	F14_v_rep-253453	1	1080752	4232.61	40.3642	1.12012	1512				100				2.50303	Back Stutter	8.33794	Forward Stutter	4.97681	86	1.4519				0.00106049
2.8.0	F14_v_rep-371121	1	1058307	5574.98	40.2915	1.08299	1550				100				2.53714	Back Stutter	8.11961	Forward Stutter	5.17976	86	1.66994				0.00120097
2.8.0	F14_v_rep-646333	1	1045958	6186.91	40.471	1.06822	1562				100				2.67961	Back Stutter	8.44671	Forward Stutter	3.94065	86	1.61732				0.00116577
2.8.0	F14_v_rep-807468	1	1034181	3597.35	39.9766	1.09492	1565				100				2.52938	Back Stutter	8.11183	Forward Stutter	5.46433	86	1.87425				0.00137686
2.8.0	F14_v_rep-847878	1	1008764	6614.73	39.952	1.09434	1598				100				2.716	Back Stutter	7.97923	Forward Stutter	4.52728	86	2.15705				0.001575
2.8.0	F14_v_rep-854597	1	1048433	5739.05	40.3878	1.06356	1551				100				2.5284	Back Stutter	7.7505	Forward Stutter	3.70143	86	1.77679				0.00129545
2.8.0	F14_v_rep-867334	1	1063646	8094.28	40.4163	1.08684	1591				100				2.54311	Back Stutter	7.87822	Forward Stutter	5.72871	86	1.69733				0.00120033
2.8.0	F15_v_rep-37555	1	1034829	4701.33	36.905	1.06088	1365				100				2.69372	Back Stutter	12.3237	Forward Stutter	5.62003	81	1.26893				0.00102854
2.8.0	F15_v_rep-145692	1	1009341	5503.6	37.0476	1.06761	1386				100				2.7422	Back Stutter	12.7946	Forward Stutter	5.64991	81	1.45119				0.00117524
2.8.0	F15_v_rep-230475	1	990494	6542.89	37.0137	1.12807	1406				100				2.87084	Back Stutter	12.1796	Forward Stutter	6.66788	81	1.58575				0.0012943
2.8.0	F15_v_rep-253453	1	1017423	4109.49	37.1487	1.05464	1396				100				2.75781	Back Stutter	13.0122	Forward Stutter	6.71416	81	1.43867				0.00115595
2.8.0	F15_v_rep-371121	1	974673	5222.11	36.7007	1.09768	1379				100				2.72145	Back Stutter	12.1919	Forward Stutter	4.41367	81	1.71723				0.00143505
2.8.0	F15_v_rep-646333	1	993223	4653.82	37.3072	1.11988	1371				100				3.07352	Back Stutter	12.6271	Forward Stutter	4.12454	81	1.31873				0.00105662
2.8.0	F15_v_rep-807468	1	1023295	4109	36.9049	1.0898	1394				100				2.91386	Back Stutter	13.7347	Forward Stutter	4.93975	81	1.28294				0.00101773
2.8.0	F15_v_rep-847878	1	1029787	5427.89	36.9603	1.05094	1357				100				2.64257	Back Stutter	13.2955	Forward Stutter	6.22521	81	1.23204				0.0010002
2.8.0	F15_v_rep-854597	1	987311	4728.25	36.5708	1.10825	1362				100				2.97419	Back Stutter	12.2633	Forward Stutter	4.40332	81	1.4325				0.0011812
2.8.0	F15_v_rep-867334	1	999226	5928.69	36.5395	1.06031	1336				100				2.88803	Back Stutter	13.1159	Forward Stutter	4.36338	81	1.2404				0.00102966
2.8.0	F16_V_rep-37555	1	994022	7223.39	33.3746	1.10248	1420				100				3.14032	Back Stutter	10.2653	Forward Stutter	10.719	85	1.65685				0.00132976
2.8.0	F16_V_rep-145692	1	990014	7755.24	33.6496	1.08624	1426				100				3.00104	Back Stutter	10.1909	Forward Stutter	9.75368	85	1.84791				0.00148829
2.8.0	F16_V_rep-230475	1	974215	5065.58	33.3015	1.08903	1457				100				3.33592	Back Stutter	10.0915	Forward Stutter	8.62029	85	1.92965				0.00153121
2.8.0	F16_V_rep-253453	1	966671	4396.45	33.3152	1.19	1466				100				3.05565	Back Stutter	9.88005	Forward Stutter	10.8016	85	2.20241				0.00179648
2.8.0	F16_V_rep-371121	1	1024008	4177.74	33.8922	1.07248	1389				100				2.79566	Back Stutter	10.6059	Forward Stutter	9.57763	85	1.5873				0.00130198
2.8.0	F16_V_rep-646333	1	986987	5628.1	33.837	1.14242	1377				100				3.06622	Back Stutter	9.97142	Forward Stutter	10.2321	85	1.76099				0.00145786
2.8.0	F16_V_rep-807468	1	966429	2818.85	33.1828	1.0798	1419				100				3.02086	Back Stutter	9.90644	Forward Stutter	8.95952	85	2.01045				0.00167161
2.8.0	F16_V_rep-847878	1	1162557	5901.14	33.4712	1.31855	1360				100				3.50243	Back Stutter	10.3566	Forward Stutter	8.45873	85	1.66682				0.00139825
2.8.0	F16_V_rep-854597	1	995962	4748.07	33.3832	1.08628	1371				100				2.98518	Back Stutter	10.5302	Forward Stutter	9.36839	85	1.61876				0.00134312
2.8.0	F16_V_rep-867334	1	979919	3949.57	33.291	1.10353	1473				100				3.18566	Back Stutter	10.8785	Forward Stutter	10.3176	85	2.04463				0.00161269
2.8.0	F17_v_rep-37555	1	1320182	6858.63	40.6854	1.0652	1389				100				2.78855	Back Stutter	5.1269	Forward Stutter	5.29478	78	1.26178				0.00100212
2.8.0	F17_v_rep-145692	1	1343717	6800.34	41.1005	1.02512	1354				100				2.86798	Back Stutter	5.05434	Forward Stutter	6.17769	78	1.01392				0.000809655
2.8.0	F17_v_rep-230475	1	1277265	4351.04	40.8041	1.07589	1365				100				2.78777	Back Stutter	5.14597	Forward Stutter	5.61784	78	1.44759				0.00119385
2.8.0	F17_v_rep-253453	1	1318377	4544.52	41.3676	1.06067	1395				100				2.7133	Back Stutter	5.08533	Forward Stutter	7.34055	78	1.40379				0.00112103
2.8.0	F17_v_rep-371121	1	1305859	6103.67	41.2647	1.13033	1377				100				2.84413	Back Stutter	5.25736	Forward Stutter	4.76632	78	1.29647				0.00103471
2.8.0	F17_v_rep-646333	1	1281371	5278.31	41.0736	1.12191	1355				100				2.86323	Back Stutter	5.29768	Forward Stutter	5.30187	78	1.50411				0.00128881
2.8.0	F17_v_rep-807468	1	1260671	5641.08	41.1103	1.13442	1356				100				2.95399	Back Stutter	5.24658	Forward Stutter	4.7511	78	1.40034				0.00116228
2.8.0	F17_v_rep-847878	1	1309456	4325.37	41.2842	1.06401	1390				100				2.80527	Back Stutter	5.13948	Forward Stutter	4.67108	78	1.35082				0.00107688
2.8.0	F17_v_rep-854597	1	1318735	4355.13	41.115	1.10885	1393				100				2.72747	Back Stutter	5.28291	Forward Stutter	5.28209	78	1.38386				0.00110724
2.8.0	F17_v_rep-867334	1	1553979	8856.74	41.2808	1.28664	1342				100				2.80466	Back Stutter	5.08146	Forward Stutter	4.35297	78	1.30565				0.00109243
2.8.0	F18_V_rep-37555	1	1088587	5466.68	33.3719	1.13892	903				100				2.44327	Back Stutter	5.32323	Forward Stutter	5.80242	98	1.23437				0.00159923
2.8.0	F18_V_rep-145692	1	1107098	5793.24	33.7167	1.08981	882				100				2.30814	Back Stutter	4.75271	Forward Stutter	6.00567	98	1.26084				0.00169202
2.8.0	F18_V_rep-230475	1	1068507	7702.68	32.8143	1.03208	882				100				2.51388	Back Stutter	5.06368	Forward Stutter	5.54772	98	1.26285				0.00169186
2.8.0	F18_V_rep-253453	1	1094545	5871.47	33.5185	1.08271	878				100				2.40473	Back Stutter	4.86876	Forward Stutter	6.5412	98	1.19565				0.00159431
2.8.0	F18_V_rep-371121	1	1055085	4478.43	33.5798	1.07666	947				100				2.45351	Back Stutter	4.77451	Forward Stutter	6.45643	98	1.61221				0.00206169
2.8.0	F18_V_rep-646333	1	1080189	5613.77	33.3637	1.07441	899				100				2.44681	Back Stutter	5.02977	Forward Stutter	4.76199	98	1.24949				0.00162411
2.8.0	F18_V_rep-807468	1	1075800	4621.96	33.3044	1.03489	919				100				2.26136	Back Stutter	4.78397	Forward Stutter	5.94409	98	1.58173				0.0021034
2.8.0	F18_V_rep-847878	1	1069525	5408.33	33.1583	1.09975	901				100				2.47971	Back Stutter	4.875	Forward Stutter	4.25126	98	1.47919				0.00200494
2.8.0	F18_V_rep-854597	1	1049560	6145.24	33.4261	1.06472	942				100				2.36651	Back Stutter	4.89768	Forward Stutter	5.49885	98	1.7324				0.00231206
2.8.0	F18_V_rep-867334	1	1067204	3384.83	33.321	1.05206	880				100				2.45455	Back Stutter	5.05006	Forward Stutter	5.23179	98	1.3613				0.00186569
2.8.0	F19_V_rep-37555	1	917444	6090.01	44.3376	1.06865	1584				100				2.56475	Back Stutter	8.25904	Forward Stutter	5.9633	81	1.9037				0.00138487
2.8.0	F19_V_rep-145692	1	924625	6682.73	44.2479	1.07087	1568				100				2.58677	Back Stutter	8.12702	Forward Stutter	4.64258	81	1.80469				0.00127221
2.8.0	F19_V_rep-230475	1	922601	6393.22	43.8383	1.07424	1520				100				2.51552	Back Stutter	7.6571	Forward Stutter	5.43974	81	1.6794				0.00124643
2.8.0	F19_V_rep-253453	1	925070	5475.73	43.99	1.07187	1501				100				2.58183	Back Stutter	7.98186	Forward Stutter	6.70181	81	1.59921				0.00118481
2.8.0	F19_V_rep-371121	1	940462	5227.74	44.4625	1.11881	1454				100				2.50983	Back Stutter	7.96654	Forward Stutter	5.07369	81	1.49701				0.00113103
2.8.0	F19_V_rep-646333	1	920069	6493.38	44.2123	1.04974	1569				100				2.52452	Back Stutter	8.09434	Forward Stutter	6.5657	81	2.07945				0.00152062
2.8.0	F19_V_rep-807468	1	924104	6647.87	43.8406	1.093	1481				100				2.66585	Back Stutter	8.03777	Forward Stutter	8.11993	81	1.48037				0.00108997
2.8.0	F19_V_rep-847878	1	916480	5226.59	44.4463	1.10957	1471				100				2.60106	Back Stutter	7.9434	Forward Stutter	4.3577	81	1.63331				0.0012458
2.8.0	F19_V_rep-854597	1	927715	5413.23	44.2676	1.18881	1475				100				2.46503	Back Stutter	7.75151	Forward Stutter	4.58957	81	1.68939				0.00130881
2.8.0	F19_V_rep-867334	1	918773	9041.98	44.1058	1.07869	1481				100				2.60748	Back Stutter	7.94376	Forward Stutter	4.56507	81	1.653				0.00126792
2.8.0	1-1-1-1_1.6ng_Set 2_rep-35262	4	349093151	188287	77.4623	1.01018	647	596	557	508	28.0457	25.8338	24.125	21.9954	2.56665	Back Stutter	4.50667	Forward Stutter	6.24964	85	1.59889	1.27556	1.13586	0.967231	0.00340882	0.00279131	0.00262203	0.00240393
2.8.0	1-1-1-1_1.6ng_Set 2_rep-104565	4	412494643	224157	77.0428	1.00212	653	601	561	511	28.0699	25.8278	24.1062	21.9962	2.59926	Back Stutter	4.43631	Forward Stutter	6.06731	85	1.62313	1.31606	1.13368	0.972052	0.00343941	0.00288372	0.00259253	0.00239136
2.8.0	1-1-1-1_1.6ng_Set 2_rep-562810	4	286905662	200093	77.835	1.00397	651	600	560	512	28.0061	25.8343	24.1233	22.0362	2.55209	Back Stutter	4.46874	Forward Stutter	6.34732	85	1.59392	1.33438	1.18917	0.993488	0.00337017	0.0029417	0.00276232	0.00245875
2.8.0	1-1-1-1_1.6ng_Set 2_rep-626603	4	388468053	184838	77.6094	1.00074	644	594	555	506	28.0203	25.8352	24.131	22.0134	2.56268	Back Stutter	4.50524	Forward Stutter	6.5381	85	1.54681	1.30262	1.10133	0.97653	0.00327119	0.00288862	0.00253108	0.00243766
2.8.0	1-1-1-1_1.6ng_Set 2_rep-655450	4	379578256	191553	77.0738	1.00049	650	599	560	511	28.0233	25.8224	24.1292	22.0252	2.59563	Back Stutter	4.4789	Forward Stutter	7.153	85	1.6017	1.31866	1.13443	0.991031	0.00339138	0.00289966	0.00259728	0.00245252
2.8.0	1-1-1-1_1.6ng_Set 2_rep-803747	4	310875478	185015	77.1159	1.00368	654	603	563	514	28.0318	25.8297	24.1172	22.0214	2.57198	Back Stutter	4.4164	Forward Stutter	6.61504	85	1.6374	1.38874	1.16728	1.01594	0.00347313	0.00309322	0.00268187	0.00251617
2.8.0	1-1-1-1_1.6ng_Set 2_rep-874844	4	304345587	302068	77.6077	1.00311	654	603	563	513	28.0494	25.8266	24.117	22.007	2.57922	Back Stutter	4.44081	Forward Stutter	6.3969	85	1.62638	1.31151	1.16248	0.997842	0.0034369	0.00285924	0.00266616	0.00246104
2.8.0	1-1-1-1_1.6ng_Set 2_rep-887628	4	350845688	270318	76.8912	1.00163	651	600	560	510	28.06	25.8348	24.1151	21.99	2.56249	Back Stutter	4.46967	Forward Stutter	6.57761	85	1.62796	1.33275	1.12451	1.00049	0.00346838	0.00294127	0.00257047	0.00248973
2.8.0	1-1-1-1_1.6ng_Set 2_rep-952324	4	316765815	195588	77.5417	1.00336	650	599	559	510	28.0468	25.8279	24.118	22.0073	2.56772	Back Stutter	4.45431	Forward Stutter	7.26431	85	1.62027	1.29067	1.14874	1.00625	0.00345022	0.00282022	0.00264503	0.00250754
2.8.0	1-1-1-1_1.6ng_Set 2_rep-960932	4	351602099	207260	77.4367	1.00926	651	599	559	511	28.0767	25.817	24.0957	22.0105	2.57418	Back Stutter	4.44317	Forward Stutter	6.4472	85	1.63163	1.31708	1.13972	0.93629	0.00348014	0.00289891	0.00262259	0.00229331
2.8.0	1-1-1-1_50pg_Set 2_rep-35262	4	55125961	58566.4	2.19987	1.02203	38	29	23	15	36.568	27.8475	21.5548	14.0297	2.80635	Back Stutter	10.3925	Forward Stutter	8.92769	89	0.0967789	0.068995	0.0497028	0.0351164	0.00355303	0.00322008	0.00292162	0.00329109
2.8.0	1-1-1-1_50pg_Set 2_rep-104565	4	54045706	56953.6	2.07276	1.00984	39	29	23	15	36.6834	27.7675	21.4073	14.1417	2.76978	Back Stutter	10.9713	Forward Stutter	7.06204	89	0.103512	0.0709358	0.0523538	0.0348023	0.0038288	0.00332361	0.00312134	0.0031407
2.8.0	1-1-1-1_50pg_Set 2_rep-562810	4	55173127	59485.5	2.01555	1.0141	39	29	23	15	36.5666	27.781	21.5246	14.1278	2.71539	Back Stutter	10.8097	Forward Stutter	7.40945	89	0.103317	0.0713913	0.051411	0.0350436	0.00383429	0.0033424	0.00302179	0.00320292
2.8.0	1-1-1-1_50pg_Set 2_rep-626603	4	54710809	67643.5	2.45936	1.00941	39	29	23	15	36.5947	27.828	21.5079	14.0694	2.6935	Back Stutter	12.3067	Forward Stutter	7.14219	89	0.102206	0.0693442	0.0501146	0.035168	0.00376326	0.00319482	0.00291689	0.00321851
2.8.0	1-1-1-1_50pg_Set 2_rep-655450	4	54835767	44496.6	2.05027	1.00611	39	30	23	15	36.715	27.8468	21.4626	13.9755	2.78476	Back Stutter	10.6769	Forward Stutter	7.47574	89	0.103247	0.0667672	0.0501165	0.0378606	0.00378492	0.00301292	0.00289823	0.00358455
2.8.0	1-1-1-1_50pg_Set 2_rep-803747	4	54400215	63230	1.92061	1.0154	39	29	23	15	36.6525	27.8456	21.5059	13.9959	2.70791	Back Stutter	10.2054	Forward Stutter	7.72451	89	0.101626	0.0671638	0.0520406	0.0371175	0.00374345	0.00306484	0.00307627	0.00352195
2.8.0	1-1-1-1_50pg_Set 2_rep-874844	4	54377328	58896.8	2.1469	1.00987	39	30	23	15	36.64	27.8029	21.5042	14.0529	2.70462	Back Stutter	10.6591	Forward Stutter	7.65982	89	0.103941	0.0702239	0.0524843	0.0379639	0.0038027	0.00322165	0.00307513	0.00354731
2.8.0	1-1-1-1_50pg_Set 2_rep-887628	4	54778047	69923.6	2.06527	1.02041	39	29	23	15	36.5599	27.8142	21.5231	14.1027	2.72464	Back Stutter	12.1236	Forward Stutter	6.99443	89	0.103229	0.0733983	0.0500262	0.0354594	0.0038272	0.00346139	0.00289933	0.00324046
2.8.0	1-1-1-1_50pg_Set 2_rep-952324	4	52346851	61946.1	2.01979	1.00898	39	30	23	15	36.9339	27.9016	21.417	13.7475	2.77116	Back Stutter	10.9858	Forward Stutter	7.33386	89	0.105848	0.0677014	0.0521953	0.0368105	0.00388602	0.00305611	0.00309106	0.00352966
2.8.0	1-1-1-1_50pg_Set 2_rep-960932	4	54968415	68813	1.98163	1.00337	39	29	23	15	36.6274	27.7751	21.4796	14.1179	2.73635	Back Stutter	11.5465	Forward Stutter	7.84416	89	0.102183	0.0703339	0.0485648	0.035313	0.00374821	0.00325637	0.00279269	0.00320526
2.8.0	1-1-1-1_100pg_Set 2_rep-35262	4	54474755	186329	8.19389	1.0093	60	41	31	22	38.6643	26.5149	20.3104	14.5104	2.70733	Back Stutter	11.4395	Forward Stutter	8.58768	89	0.198783	0.114374	0.0726392	0.045345	0.00549135	0.00410751	0.00312031	0.00262038
2.8.0	1-1-1-1_100pg_Set 2_rep-104565	4	58695473	160462	8.04282	1.00443	61	42	33	24	38.0558	26.285	20.5017	15.1575	2.67313	Back Stutter	9.99558	Forward Stutter	8.29139	89	0.199924	0.108256	0.0735806	0.0441759	0.00536092	0.00362986	0.00298648	0.00226839
2.8.0	1-1-1-1_100pg_Set 2_rep-562810	4	56539457	124406	8.00182	1.03171	58	40	31	22	38.4283	26.4744	20.4324	14.6649	2.69528	Back Stutter	10.9205	Forward Stutter	7.26938	89	0.189066	0.109106	0.0692918	0.0448966	0.00527509	0.00395428	0.00299212	0.00264851
2.8.0	1-1-1-1_100pg_Set 2_rep-626603	4	56748763	161509	7.26216	1.01408	60	42	33	24	37.9908	26.3645	20.5151	15.1296	2.69558	Back Stutter	11.7863	Forward Stutter	7.34842	89	0.197593	0.113694	0.074378	0.0461269	0.00531929	0.0039152	0.00304841	0.00242283
2.8.0	1-1-1-1_100pg_Set 2_rep-655450	4	57903109	171554	7.9646	1.0235	59	41	32	23	38.2643	26.3766	20.3576	15.0015	2.69181	Back Stutter	10.1494	Forward Stutter	7.66686	89	0.196238	0.114303	0.06899	0.0435737	0.00544719	0.00411973	0.00288165	0.00236226
2.8.0	1-1-1-1_100pg_Set 2_rep-803747	4	55989694	119736	7.99385	1.01264	61	42	32	24	38.3363	26.3846	20.3934	14.8858	2.68727	Back Stutter	11.0442	Forward Stutter	7.32537	89	0.202493	0.115755	0.0741788	0.0452927	0.0055005	0.00404091	0.00307575	0.00242729
2.8.0	1-1-1-1_100pg_Set 2_rep-874844	4	57236310	121666	7.24683	1.06292	59	41	32	23	38.234	26.3866	20.4358	14.9437	2.71577	Back Stutter	10.3396	Forward Stutter	7.10095	89	0.195661	0.112168	0.0737472	0.0438748	0.00548011	0.00404423	0.00318262	0.00242392
2.8.0	1-1-1-1_100pg_Set 2_rep-887628	4	57200892	143349	7.92227	1.01321	60	42	32	24	38.2025	26.336	20.4278	15.0337	2.64401	Back Stutter	10.9178	Forward Stutter	7.30425	89	0.197821	0.112259	0.0737039	0.0471076	0.00533459	0.00389346	0.00305934	0.00252738
2.8.0	1-1-1-1_100pg_Set 2_rep-952324	4	57569199	154554	7.52599	1.02069	60	42	32	24	38.0646	26.4134	20.4279	15.0941	2.67501	Back Stutter	11.0408	Forward Stutter	7.70987	89	0.195247	0.115334	0.0738113	0.044095	0.00525495	0.00403992	0.00306866	0.00231813
2.8.0	1-1-1-1_100pg_Set 2_rep-960932	4	56454842	232291	7.46117	1.01252	60	41	32	23	38.2505	26.3126	20.4544	14.9824	2.67956	Back Stutter	10.5539	Forward Stutter	6.9112	89	0.197838	0.110725	0.0739256	0.0468576	0.00540167	0.00386496	0.00309763	0.00255779
2.8.0	1-1-1-1_200pg_Set 2_rep-35262	4	76716569	193154	11.063	1.00636	66	48	37	27	36.951	26.8622	20.9605	15.2262	2.43767	Back Stutter	10.9757	Forward Stutter	7.37401	89	0.217142	0.132622	0.0867966	0.0531782	0.00536141	0.00402551	0.00312101	0.00248564
2.8.0	1-1-1-1_200pg_Set 2_rep-104565	4	78175938	180315	12.0417	1.00743	66	48	37	27	36.8928	26.8081	20.9939	15.3052	2.38272	Back Stutter	11.3328	Forward Stutter	7.01059	89	0.214268	0.129862	0.0848039	0.0535925	0.00527318	0.00392267	0.00302576	0.00249711
2.8.0	1-1-1-1_200pg_Set 2_rep-562810	4	78288352	247342	11.2407	1.02703	67	48	38	28	36.9977	26.7662	20.9487	15.2874	2.43579	Back Stutter	12.2802	Forward Stutter	7.58559	89	0.219165	0.132854	0.0878462	0.0529141	0.00536675	0.00401725	0.0031392	0.00243134
2.8.0	1-1-1-1_200pg_Set 2_rep-626603	4	76604944	163385	11.6229	1.00986	66	48	37	27	36.9843	26.9649	21.0104	15.0404	2.38796	Back Stutter	11.1694	Forward Stutter	7.56472	89	0.212186	0.131678	0.0858344	0.0531603	0.00519372	0.00399211	0.00308307	0.00254151
2.8.0	1-1-1-1_200pg_Set 2_rep-655450	4	77715532	171438	12.0813	1.00688	66	48	37	27	36.9405	26.8237	21.0214	15.2145	2.41674	Back Stutter	11.1591	Forward Stutter	7.45202	89	0.211934	0.126404	0.0865093	0.0536518	0.00516894	0.00376594	0.00310533	0.00253438
2.8.0	1-1-1-1_200pg_Set 2_rep-803747	4	80646609	142523	11.3285	1.00615	66	49	38	28	36.6186	26.9059	21.0928	15.3826	2.40906	Back Stutter	10.6791	Forward Stutter	6.94887	89	0.21069	0.134905	0.0854895	0.0548472	0.00504022	0.00403192	0.00296699	0.00250269
2.8.0	1-1-1-1_200pg_Set 2_rep-874844	4	78266284	226049	11.7525	1.01644	66	48	38	28	36.956	26.7653	20.9312	15.3476	2.38803	Back Stutter	12.6049	Forward Stutter	7.48157	89	0.2158	0.13047	0.0853658	0.0535988	0.00527394	0.0039269	0.00303786	0.00247425
2.8.0	1-1-1-1_200pg_Set 2_rep-887628	4	80953111	175877	11.1321	1.0115	66	48	38	28	36.9022	26.8096	20.9825	15.3058	2.39762	Back Stutter	11.9455	Forward Stutter	7.5697	89	0.21187	0.12687	0.0844661	0.0537109	0.00509	0.00373885	0.0029692	0.00247986
2.8.0	1-1-1-1_200pg_Set 2_rep-952324	4	79833781	158074	11.6143	1.01378	66	48	38	27	36.8958	26.8778	20.9873	15.2391	2.41287	Back Stutter	11.3509	Forward Stutter	7.64319	89	0.210427	0.129117	0.0844287	0.0515174	0.00507248	0.00385372	0.00299316	0.00237984
2.8.0	1-1-1-1_200pg_Set 2_rep-960932	4	81502095	287936	11.4698	1.00593	66	48	38	28	36.6191	26.8173	21.094	15.4696	2.39783	Back Stutter	11.4313	Forward Stutter	7.86642	89	0.208396	0.130018	0.0870729	0.0522371	0.00500761	0.0038788	0.00307213	0.00235596
2.8.0	1-1-1-1_400pg_Set 2_rep-35262	4	428402943	139197	36.7145	1.00569	170	111	88	68	38.9587	25.3603	20.1066	15.5744	2.41939	Back Stutter	8.29982	Forward Stutter	7.01764	89	0.536927	0.254374	0.162624	0.0874127	0.00500313	0.00308267	0.00233026	0.001489
2.8.0	1-1-1-1_400pg_Set 2_rep-104565	4	442781973	148095	35.7698	1.00404	168	111	88	68	38.6506	25.4421	20.2392	15.6681	2.40953	Back Stutter	8.30555	Forward Stutter	7.72826	89	0.52696	0.253629	0.166587	0.0842925	0.0049271	0.00306636	0.00238792	0.00142103
2.8.0	1-1-1-1_400pg_Set 2_rep-562810	4	422079000	293096	34.3188	1.00205	165	110	87	67	38.4187	25.5922	20.3023	15.6869	2.43879	Back Stutter	9.6178	Forward Stutter	7.15668	89	0.514679	0.252513	0.162323	0.0846559	0.00487584	0.00307485	0.00232971	0.00144568
2.8.0	1-1-1-1_400pg_Set 2_rep-626603	4	397639077	168155	36.3689	1.00287	169	111	88	68	38.8397	25.435	20.121	15.6043	2.42979	Back Stutter	8.79847	Forward Stutter	7.1914	89	0.540498	0.257704	0.15575	0.0887071	0.00508993	0.00312831	0.00219481	0.0015126
2.8.0	1-1-1-1_400pg_Set 2_rep-655450	4	445442925	281500	34.3258	1.00296	168	111	88	68	38.6073	25.55	20.245	15.5977	2.48221	Back Stutter	9.3772	Forward Stutter	7.60191	89	0.531556	0.260262	0.160914	0.0859327	0.00502551	0.00316679	0.00228051	0.00146334
2.8.0	1-1-1-1_400pg_Set 2_rep-803747	4	425525087	255740	37.2534	1.00214	172	112	88	68	39.0776	25.341	20.0732	15.5082	2.41788	Back Stutter	8.18424	Forward Stutter	6.80121	89	0.555384	0.260384	0.160958	0.0876455	0.00518719	0.00314575	0.00226639	0.00148438
2.8.0	1-1-1-1_400pg_Set 2_rep-874844	4	436089915	255753	34.745	1.00227	172	111	88	68	39.2086	25.3234	20.0045	15.4634	2.46734	Back Stutter	9.54803	Forward Stutter	6.88913	89	0.555003	0.261137	0.160481	0.0871539	0.00519746	0.0031835	0.00228172	0.00148821
2.8.0	1-1-1-1_400pg_Set 2_rep-887628	4	474090580	246152	34.4252	1.00568	169	111	88	68	38.6549	25.4753	20.2141	15.6556	2.43088	Back Stutter	9.26347	Forward Stutter	7.5481	89	0.535936	0.255794	0.159392	0.0862814	0.00505126	0.00308538	0.00224444	0.00145674
2.8.0	1-1-1-1_400pg_Set 2_rep-952324	4	435349875	282366	34.0352	1.00389	171	111	88	68	39.0478	25.4102	20.0426	15.4993	2.42756	Back Stutter	8.74914	Forward Stutter	7.62702	89	0.549286	0.266647	0.153218	0.0857877	0.00515811	0.00327305	0.0021512	0.00146
2.8.0	1-1-1-1_400pg_Set 2_rep-960932	4	448892336	270314	34.041	1.00263	169	109	87	67	39.0262	25.2974	20.1242	15.5522	2.41403	Back Stutter	8.82887	Forward Stutter	7.98315	89	0.537556	0.249176	0.155839	0.0865386	0.00506399	0.00303752	0.00221511	0.00148865
2.8.0	1-1-1-1_800pg_Set 2_rep-35262	4	443025584	183308	53.0257	1.00182	369	272	219	174	35.6799	26.3164	21.1585	16.8452	2.83066	Back Stutter	7.42757	Forward Stutter	6.87359	85	1.12902	0.671994	0.430161	0.247475	0.0047367	0.00340703	0.00249953	0.00167214
2.8.0	1-1-1-1_800pg_Set 2_rep-104565	4	471084270	101067	54.1608	1.00242	371	273	219	174	35.7672	26.3175	21.1214	16.7938	2.78164	Back Stutter	7.358	Forward Stutter	7.07387	85	1.13983	0.673477	0.427216	0.248913	0.00476325	0.00339972	0.00247055	0.00168197
2.8.0	1-1-1-1_800pg_Set 2_rep-562810	4	579359601	227578	52.2988	1.00483	369	273	220	175	35.5976	26.3055	21.2351	16.8618	2.84304	Back Stutter	7.72313	Forward Stutter	6.99536	85	1.12761	0.672662	0.437405	0.247185	0.00471499	0.00339544	0.00252921	0.00166018
2.8.0	1-1-1-1_800pg_Set 2_rep-626603	4	542016922	170999	53.8931	1.00499	370	273	220	176	35.6569	26.2632	21.177	16.9029	2.79221	Back Stutter	7.69373	Forward Stutter	7.9362	85	1.13721	0.665629	0.430362	0.25431	0.00476016	0.00334753	0.00248208	0.00171046
2.8.0	1-1-1-1_800pg_Set 2_rep-655450	4	466491385	306565	52.9099	1.0009	368	271	218	174	35.6835	26.2907	21.155	16.8708	2.84576	Back Stutter	7.42107	Forward Stutter	7.00984	85	1.13244	0.66591	0.4263	0.247272	0.00476859	0.00337329	0.00247487	0.0016699
2.8.0	1-1-1-1_800pg_Set 2_rep-803747	4	382764007	87523.5	53.7779	1.00427	372	274	219	175	35.7444	26.2952	21.0962	16.8642	2.80898	Back Stutter	7.77656	Forward Stutter	7.08231	85	1.14901	0.678711	0.430541	0.253262	0.00481144	0.00342769	0.00249114	0.00170347
2.8.0	1-1-1-1_800pg_Set 2_rep-874844	4	527685017	151638	54.7243	1.00307	371	274	219	174	35.7159	26.3515	21.1337	16.7989	2.86537	Back Stutter	7.48541	Forward Stutter	6.0488	85	1.13985	0.67458	0.428855	0.245509	0.00476662	0.00339585	0.00247817	0.00165267
2.8.0	1-1-1-1_800pg_Set 2_rep-887628	4	470844413	199733	52.1263	1.0069	373	274	220	175	35.812	26.2832	21.1198	16.785	2.82614	Back Stutter	8.3439	Forward Stutter	7.41103	85	1.1542	0.680389	0.431699	0.248517	0.00481747	0.00343307	0.00248958	0.00167112
2.8.0	1-1-1-1_800pg_Set 2_rep-952324	4	518837003	181326	53.2481	1.00591	370	272	219	175	35.6897	26.2482	21.165	16.8971	2.79861	Back Stutter	8.26617	Forward Stutter	7.1843	85	1.12704	0.661413	0.423183	0.248066	0.00470685	0.00333437	0.00244099	0.00166718
2.8.0	1-1-1-1_800pg_Set 2_rep-960932	4	545199179	230765	52.6305	1.00181	370	272	219	175	35.731	26.2336	21.1656	16.8698	2.85486	Back Stutter	7.79858	Forward Stutter	7.74095	85	1.14084	0.665619	0.430402	0.248041	0.00478501	0.00336209	0.00249053	0.00166829
2.8.0	4:3:2:1_1ng_Set 1 Amp 1_rep-53278	4	825735186	115309	52.3399	1.01533	537	431	305	139	38.0344	30.4947	21.6209	9.85009	5.20816	Back Stutter	4.5595	Forward Stutter	5.65964	85	1.27095	0.969062	0.793032	0.272537	0.00360951	0.00339821	0.00370958	0.00249409
2.8.0	4:3:2:1_1ng_Set 1 Amp 1_rep-274872	4	685628671	106593	51.8815	1.00916	536	432	321	140	37.543	30.2094	22.4087	9.8389	5.23293	Back Stutter	4.56972	Forward Stutter	5.87682	85	1.30623	1.14524	0.6977	0.283471	0.00363121	0.0041472	0.00322307	0.00258846
2.8.0	4:3:2:1_1ng_Set 1 Amp 1_rep-371049	4	851780578	66120.6	55.9111	1.01415	537	432	306	138	37.9961	30.5457	21.6776	9.78054	5.20334	Back Stutter	4.61352	Forward Stutter	5.50287	85	1.30082	0.913531	0.82528	0.268332	0.0036274	0.00306159	0.00391129	0.00246063
2.8.0	4:3:2:1_1ng_Set 1 Amp 1_rep-405610	4	723723393	121020	54.2665	1.0173	530	423	303	136	38.0652	30.3804	21.7784	9.77598	4.92033	Back Stutter	5.12231	Forward Stutter	5.26179	85	0.972565	1.12504	0.793105	0.26106	0.00252636	0.00410912	0.00372189	0.00242125
2.8.0	4:3:2:1_1ng_Set 1 Amp 1_rep-408958	4	995884164	103295	53.6284	1.01222	538	431	305	138	38.0847	30.4906	21.6362	9.78858	5.03713	Back Stutter	4.44261	Forward Stutter	6.21616	85	1.31582	0.990385	0.771829	0.272437	0.00360311	0.00331602	0.00362891	0.00251075
2.8.0	4:3:2:1_1ng_Set 1 Amp 1_rep-578239	4	873986834	74891	52.0622	1.02062	534	426	305	138	38.0761	30.3554	21.7372	9.83122	5.04952	Back Stutter	4.46621	Forward Stutter	5.90254	85	1.0796	1.21527	0.71509	0.273953	0.0027829	0.00452728	0.00322722	0.00253541
2.8.0	4:3:2:1_1ng_Set 1 Amp 1_rep-745758	4	814452262	98293.9	52.6229	1.03177	532	422	305	138	38.0735	30.215	21.8298	9.88181	5.24521	Back Stutter	4.5147	Forward Stutter	5.29026	85	1.04291	1.22205	0.700935	0.26894	0.00266351	0.00459465	0.00321738	0.00247299
2.8.0	4:3:2:1_1ng_Set 1 Amp 1_rep-748540	4	596571190	129489	55.5527	1.04643	526	420	302	136	37.9829	30.3813	21.8136	9.82232	4.80078	Back Stutter	4.36751	Forward Stutter	6.06105	85	1.00294	0.977902	0.845277	0.264716	0.00266298	0.00341124	0.00414415	0.00247141
2.8.0	4:3:2:1_1ng_Set 1 Amp 1_rep-882942	4	717951652	88803.1	55.0552	1.04106	531	423	304	139	38.0158	30.2711	21.7638	9.94932	5.03051	Back Stutter	4.37826	Forward Stutter	6.27759	85	1.02412	1.1015	0.796908	0.281918	0.00266928	0.00399578	0.00373712	0.00260181
2.8.0	4:3:2:1_1ng_Set 1 Amp 1_rep-907150	4	965299501	83374.3	53.5729	1.01645	534	429	306	136	37.9764	30.5005	21.8175	9.70561	4.85917	Back Stutter	4.35616	Forward Stutter	7.36349	85	1.14179	1.16193	0.739226	0.267426	0.00297139	0.00406421	0.00344913	0.00248882
2.8.0	4:3:2:1_1ng_Set 1 Amp 2_rep-53278	4	469159647	149231	51.2826	1.07187	465	375	278	153	36.5703	29.5404	21.9153	11.974	3.75245	Back Stutter	8.93745	Forward Stutter	5.72341	85	1.18768	0.868762	0.527119	0.418901	0.00425076	0.0038261	0.00317894	0.00451762
2.8.0	4:3:2:1_1ng_Set 1 Amp 2_rep-274872	4	585880014	218446	48.3616	1.013	451	364	262	142	37.0168	29.8491	21.5066	11.6275	3.98172	Back Stutter	9.13944	Forward Stutter	6.18601	85	0.823851	0.844323	0.724471	0.431913	0.00234538	0.00346841	0.00436706	0.0047089
2.8.0	4:3:2:1_1ng_Set 1 Amp 2_rep-371049	4	595163241	149409	47.949	1.03237	449	361	264	141	36.9956	29.6801	21.6861	11.6382	4.00684	Back Stutter	8.85085	Forward Stutter	5.3982	85	0.811906	0.758396	0.715142	0.430179	0.00227675	0.00315348	0.00452401	0.00469171
2.8.0	4:3:2:1_1ng_Set 1 Amp 2_rep-405610	4	722157704	120932	49.2894	1.04322	449	364	271	140	36.6683	29.7106	22.159	11.4621	3.88878	Back Stutter	8.6945	Forward Stutter	5.67786	85	0.961965	0.820719	0.652945	0.426636	0.00294976	0.00340276	0.00379598	0.00469402
2.8.0	4:3:2:1_1ng_Set 1 Amp 2_rep-408958	4	620535718	176596	49.2821	1.0404	452	365	269	143	36.792	29.6969	21.8912	11.6198	3.88545	Back Stutter	8.38368	Forward Stutter	6.59581	85	1.20826	0.528016	0.689935	0.440976	0.00424171	0.001731	0.00409778	0.00481583
2.8.0	4:3:2:1_1ng_Set 1 Amp 2_rep-578239	4	475481582	175565	50.1226	1.03779	455	368	277	145	36.5444	29.5595	22.249	11.647	3.77549	Back Stutter	8.92422	Forward Stutter	6.60182	85	0.885055	0.991273	0.561773	0.455601	0.00276075	0.00439469	0.00304824	0.00495688
2.8.0	4:3:2:1_1ng_Set 1 Amp 2_rep-745758	4	443822626	143829	48.2272	1.09159	457	367	272	145	36.8582	29.5811	21.8394	11.7212	3.85686	Back Stutter	8.75971	Forward Stutter	7.29102	85	1.20138	0.531744	0.663365	0.456282	0.00436418	0.00175905	0.00405311	0.00494019
2.8.0	4:3:2:1_1ng_Set 1 Amp 2_rep-748540	4	411371157	103553	50.3848	1.05724	457	369	272	149	36.649	29.6144	21.8114	11.9252	3.771	Back Stutter	8.48269	Forward Stutter	5.53621	85	1.02085	0.82281	0.673978	0.421107	0.00343036	0.00334414	0.00402764	0.00451722
2.8.0	4:3:2:1_1ng_Set 1 Amp 2_rep-882942	4	474473777	138868	48.1661	1.04819	450	362	264	142	36.9261	29.7184	21.6872	11.6683	3.92223	Back Stutter	8.41477	Forward Stutter	6.81409	85	0.951667	0.669778	0.711927	0.436772	0.00303508	0.00255322	0.00445248	0.00477271
2.8.0	4:3:2:1_1ng_Set 1 Amp 2_rep-907150	4	677520321	92204.2	47.7969	1.03397	453	367	275	145	36.5459	29.6143	22.1368	11.703	3.74469	Back Stutter	8.60594	Forward Stutter	6.04344	85	1.086	0.760702	0.623241	0.459653	0.00374099	0.00304261	0.00344589	0.00502619
2.8.0	4:3:2:1_2ng_Set 1 Amp 1_rep-53278	4	1685937146	130964	75.7246	1.00971	1102	912	638	353	36.669	30.3567	21.2168	11.7575	3.73838	Back Stutter	9.1582	Forward Stutter	6.0934	81	2.17228	1.38252	1.83722	0.735515	0.00250785	0.00185261	0.00433512	0.00269234
2.8.0	4:3:2:1_2ng_Set 1 Amp 1_rep-274872	4	1632454206	89899.3	76.2512	1.04548	1102	908	643	352	36.6681	30.2205	21.3857	11.7257	3.77987	Back Stutter	9.34089	Forward Stutter	6.86	81	2.15766	1.54594	1.64811	0.728867	0.00248641	0.00232043	0.00383763	0.00266935
2.8.0	4:3:2:1_2ng_Set 1 Amp 1_rep-371049	4	1466108755	108200	76.8216	1.01996	1114	914	666	357	36.5247	29.9778	21.784	11.7135	3.90221	Back Stutter	9.43805	Forward Stutter	6.51485	81	2.28822	1.77171	1.5687	0.747914	0.00265048	0.00283954	0.0036033	0.00270979
2.8.0	4:3:2:1_2ng_Set 1 Amp 1_rep-405610	4	1440989231	142244	76.6136	1.05234	1112	917	647	356	36.6858	30.2618	21.3229	11.7295	3.74199	Back Stutter	9.31136	Forward Stutter	5.8599	81	2.17913	1.54623	1.71111	0.734262	0.0024866	0.00228433	0.00402468	0.00266413
2.8.0	4:3:2:1_2ng_Set 1 Amp 1_rep-408958	4	1649429315	85339.4	76.5358	1.05456	1095	908	628	353	36.699	30.4165	21.0578	11.8267	3.72981	Back Stutter	9.08512	Forward Stutter	6.57464	81	2.09991	1.30023	1.7848	0.724867	0.00242123	0.00169276	0.00421173	0.00264563
2.8.0	4:3:2:1_2ng_Set 1 Amp 1_rep-578239	4	1487765118	127879	76.4635	1.01615	1109	919	637	353	36.7451	30.4487	21.1195	11.6867	3.79939	Back Stutter	9.11129	Forward Stutter	5.9962	81	2.54301	1.25055	1.733	0.730274	0.00316904	0.00158933	0.00404039	0.00267413
2.8.0	4:3:2:1_2ng_Set 1 Amp 1_rep-745758	4	1655654230	127679	75.5385	1.02508	1108	918	635	357	36.7061	30.4305	21.0475	11.8159	3.75293	Back Stutter	9.25518	Forward Stutter	6.89724	81	2.1857	1.25858	1.88709	0.742444	0.00251446	0.00160203	0.00450865	0.00269323
2.8.0	4:3:2:1_2ng_Set 1 Amp 1_rep-748540	4	2129697383	144471	76.8654	1.03787	1115	921	636	354	36.8407	30.4444	21.0108	11.7041	3.95415	Back Stutter	9.24757	Forward Stutter	6.17383	81	2.41863	1.41132	1.74146	0.738504	0.00286685	0.00184255	0.0040347	0.00269645
2.8.0	4:3:2:1_2ng_Set 1 Amp 1_rep-882942	4	1836199835	111619	75.1762	1.05445	1116	916	665	356	36.5531	30.0234	21.7535	11.67	4.16838	Back Stutter	9.05304	Forward Stutter	6.14897	81	2.28533	1.79803	1.56537	0.756639	0.00263787	0.00292257	0.003577	0.00276527
2.8.0	4:3:2:1_2ng_Set 1 Amp 1_rep-907150	4	1613630945	144978	75.8451	1.01828	1106	913	645	352	36.6864	30.2869	21.358	11.6688	3.83151	Back Stutter	9.03446	Forward Stutter	5.92088	81	2.18375	1.55635	1.72129	0.726558	0.00251206	0.00221363	0.00398802	0.00266222
2.8.0	4:3:2:1_2ng_Set 1 Amp 2_rep-274872	4	1401303165	115360	74.9627	1.0797	1230	1086	914	301	34.8326	30.7793	25.8695	8.51856	4.28781	Back Stutter	11.6411	Forward Stutter	4.80753	81	2.48462	1.98233	2.10147	0.484976	0.00282817	0.00271847	0.00364502	0.001947
2.8.0	4:3:2:1_2ng_Set 1 Amp 2_rep-371049	4	1573993856	80989.4	75.4235	1.08065	1243	1093	934	296	34.8532	30.6629	26.1749	8.30902	4.50748	Back Stutter	10.9945	Forward Stutter	5.06053	81	2.57114	2.53475	1.82438	0.469911	0.00290396	0.00368684	0.00296111	0.0019045
2.8.0	4:3:2:1_2ng_Set 1 Amp 2_rep-405610	4	1601996354	123672	75.3823	1.09952	1230	1087	913	298	34.8719	30.8271	25.8464	8.45471	4.27517	Back Stutter	11.4848	Forward Stutter	4.78029	81	2.4802	1.99216	2.09852	0.474243	0.00283101	0.00273419	0.00363139	0.00191277
2.8.0	4:3:2:1_2ng_Set 1 Amp 2_rep-408958	4	1158675461	154553	76.1195	1.11551	1254	1104	936	304	34.8539	30.686	26.0178	8.44239	4.71066	Back Stutter	11.5009	Forward Stutter	5.12732	81	3.60126	1.81425	1.61234	0.496131	0.00496276	0.00223031	0.00259466	0.00197469
2.8.0	4:3:2:1_2ng_Set 1 Amp 2_rep-578239	4	1643886420	148231	75.2533	1.12628	1248	1097	935	301	34.8426	30.6552	26.1062	8.39602	4.66026	Back Stutter	11.275	Forward Stutter	5.27546	81	3.25253	2.08984	1.60144	0.480516	0.00426854	0.00284062	0.00256931	0.00192314
2.8.0	4:3:2:1_2ng_Set 1 Amp 2_rep-745758	4	1707442169	110797	76.1726	1.12565	1244	1094	930	300	34.8697	30.6687	26.0595	8.40209	4.67886	Back Stutter	11.1389	Forward Stutter	5.04624	81	3.2308	2.07396	1.62812	0.487054	0.0042543	0.002794	0.00261502	0.00195927
2.8.0	4:3:2:1_2ng_Set 1 Amp 2_rep-748540	4	1616753515	129769	76.1617	1.12444	1235	1090	925	301	34.799	30.7137	26.0174	8.46987	4.37756	Back Stutter	11.4584	Forward Stutter	5.33393	81	2.92476	1.99858	1.82283	0.48307	0.00361572	0.00274256	0.00303442	0.00193621
2.8.0	4:3:2:1_2ng_Set 1 Amp 2_rep-882942	4	1807802908	58930.8	76.677	1.08666	1226	1084	904	293	34.9728	30.9203	25.7557	8.35122	4.48257	Back Stutter	10.947	Forward Stutter	4.84879	81	2.64739	1.65408	2.28975	0.45359	0.00309064	0.00206102	0.00399798	0.00185427
2.8.0	4:3:2:1_2ng_Set 1 Amp 2_rep-907150	4	1706853852	132568	75.6439	1.07255	1222	1079	903	296	34.9165	30.8413	25.7848	8.45747	4.21898	Back Stutter	11.2858	Forward Stutter	5.34946	81	2.45725	1.94967	2.05452	0.467806	0.00280213	0.00266852	0.00359235	0.00189721
2.8.0	4:3:2:1_63pg_Set 1 Amp 1_rep-274872	4	33507677	3063.31	-5.83538	1.02121	44	28	18	9	44.1541	28.3483	18.2368	9.26086	4.18622	Back Stutter	10.1994	Forward Stutter	7.26461	112	0.150202	0.0907561	0.0575496	0.0287174	0.00575131	0.00516389	0.00503102	0.00487774
2.8.0	4:3:2:1_63pg_Set 1 Amp 1_rep-371049	4	34887250	3927.27	-5.87203	1.01504	43	28	18	9	44.0022	28.3697	18.2937	9.33431	3.85993	Back Stutter	11.6917	Forward Stutter	7.94272	112	0.145263	0.0876302	0.0541697	0.0285349	0.0056918	0.00504869	0.00470053	0.00495853
2.8.0	4:3:2:1_63pg_Set 1 Amp 1_rep-405610	4	35186844	3921.53	-5.74546	1.0207	44	28	18	9	43.7532	28.4544	18.4027	9.38966	3.65392	Back Stutter	10.7368	Forward Stutter	7.01068	112	0.15088	0.0928247	0.0588936	0.0282343	0.00591626	0.00534225	0.00517548	0.00465973
2.8.0	4:3:2:1_63pg_Set 1 Amp 1_rep-408958	4	34195684	5002.76	-5.99013	1.00456	43	28	18	9	43.9512	28.4374	18.2966	9.31474	3.90103	Back Stutter	11.4442	Forward Stutter	8.18827	112	0.143312	0.0911305	0.0556829	0.0285397	0.00555776	0.00538715	0.00491264	0.00496823
2.8.0	4:3:2:1_63pg_Set 1 Amp 1_rep-578239	4	33531158	3489.42	-5.81442	1.01977	44	28	18	9	44.0693	28.3708	18.2685	9.29138	3.80377	Back Stutter	9.56437	Forward Stutter	7.82755	112	0.149262	0.0910222	0.0569344	0.0291048	0.0057184	0.00518666	0.00494471	0.00496971
2.8.0	4:3:2:1_63pg_Set 1 Amp 1_rep-745758	4	33191514	2975.43	-5.8611	1.04756	44	28	18	9	44.1807	28.4116	18.1971	9.2106	3.86899	Back Stutter	11.356	Forward Stutter	8.25016	112	0.149753	0.0886979	0.0571685	0.0280459	0.00580927	0.00501664	0.00507827	0.0048059
2.8.0	4:3:2:1_63pg_Set 1 Amp 1_rep-748540	4	33161376	3573.96	-5.76432	1.0099	43	28	18	9	44.2123	28.3951	18.1803	9.21233	3.77124	Back Stutter	10.3439	Forward Stutter	8.07063	112	0.151299	0.089544	0.0553128	0.0275242	0.00599005	0.00515322	0.0048504	0.0047061
2.8.0	4:3:2:1_63pg_Set 1 Amp 1_rep-882942	4	34087143	3348.78	-5.811	1.02036	43	28	18	9	43.9577	28.4641	18.2948	9.28339	3.73391	Back Stutter	10.8573	Forward Stutter	6.66044	112	0.147432	0.090994	0.0570685	0.0281623	0.00571793	0.00524252	0.00502563	0.00479962
2.8.0	4:3:2:1_63pg_Set 1 Amp 1_rep-907150	4	33334769	3375.57	-5.91829	1.02662	43	28	18	9	44.2784	28.4094	18.1485	9.16365	3.71423	Back Stutter	10.7963	Forward Stutter	8.17081	112	0.148913	0.0889722	0.0566271	0.028186	0.00587556	0.00516315	0.00512235	0.00500645
2.8.0	4:3:2:1_63pg_Set 1 Amp 2_rep-274872	4	39494388	14058.5	-2.67855	1.02385	32	23	17	10	39.4363	28.161	20.3936	12.0092	3.24439	Back Stutter	10.3438	Forward Stutter	8.10613	106	0.0980617	0.0627581	0.0437272	0.0270852	0.00471553	0.00397719	0.00375325	0.00403483
2.8.0	4:3:2:1_63pg_Set 1 Amp 2_rep-371049	4	39861897	13989.5	-2.34269	1.00858	33	23	17	10	39.3257	28.197	20.4508	12.0265	3.12773	Back Stutter	10.2339	Forward Stutter	7.46334	106	0.0977147	0.0623119	0.0446313	0.0281213	0.00458845	0.00381828	0.00375088	0.00417073
2.8.0	4:3:2:1_63pg_Set 1 Amp 2_rep-405610	4	39619246	20909.2	-2.60836	1.01921	32	23	17	10	39.4182	28.1535	20.4089	12.0195	3.26847	Back Stutter	9.45927	Forward Stutter	7.16891	106	0.0959712	0.0621729	0.0451659	0.0269923	0.00454811	0.00390719	0.00392389	0.00400963
2.8.0	4:3:2:1_63pg_Set 1 Amp 2_rep-408958	4	39342167	17742.5	-2.56468	1.00747	32	23	17	10	39.3618	28.1822	20.4299	12.0261	3.19849	Back Stutter	10.016	Forward Stutter	6.87135	106	0.0959687	0.0630726	0.0435474	0.026789	0.00456088	0.00397278	0.00369614	0.00395763
2.8.0	4:3:2:1_63pg_Set 1 Amp 2_rep-578239	4	39484832	15904	-2.66202	1.02771	32	23	16	10	39.5667	28.1463	20.3606	11.9265	3.16227	Back Stutter	13.079	Forward Stutter	7.12341	106	0.0957326	0.0609464	0.0435466	0.0268955	0.00462354	0.00388763	0.00380416	0.00412982
2.8.0	4:3:2:1_63pg_Set 1 Amp 2_rep-745758	4	40440032	19737	-2.47402	1.04309	32	23	17	10	39.3898	28.1281	20.4157	12.0663	3.22086	Back Stutter	11.0651	Forward Stutter	8.11727	106	0.0961952	0.062463	0.043966	0.0277944	0.00458309	0.00395005	0.00375574	0.00416734
2.8.0	4:3:2:1_63pg_Set 1 Amp 2_rep-748540	4	38897289	18501.4	-2.5903	1.00708	32	23	17	10	39.4806	28.21	20.3925	11.9169	3.34113	Back Stutter	9.49174	Forward Stutter	6.73868	106	0.0957594	0.0628778	0.0441089	0.0279197	0.00447292	0.00392754	0.00376024	0.00424842
2.8.0	4:3:2:1_63pg_Set 1 Amp 2_rep-882942	4	38666546	15922.1	-2.50917	1.01854	33	24	17	10	39.3543	28.1895	20.4175	12.0387	3.1815	Back Stutter	10.4396	Forward Stutter	6.86107	106	0.0989976	0.0658509	0.0471233	0.0279552	0.00463076	0.00410262	0.0040378	0.00406775
2.8.0	4:3:2:1_63pg_Set 1 Amp 2_rep-907150	4	38928812	23769.3	-2.52109	1.02327	32	23	17	10	39.455	28.1809	20.3875	11.9766	3.186	Back Stutter	10.7091	Forward Stutter	7.73795	106	0.0981746	0.0632451	0.0457625	0.027083	0.00470206	0.00399656	0.00399795	0.00402925
2.8.0	4:3:2:1_125pg_Set 1 Amp 1_rep-274872	4	47449925	43795.8	0.210425	1.0486	43	31	23	15	38.6037	27.7763	20.6207	12.9993	3.16725	Back Stutter	10.9065	Forward Stutter	8.23123	89	0.133488	0.0885201	0.0622029	0.0400507	0.00479313	0.00419245	0.00385291	0.00398506
2.8.0	4:3:2:1_125pg_Set 1 Amp 1_rep-371049	4	46080715	55712.1	0.166685	1.00567	44	32	23	15	38.8173	27.7085	20.565	12.9092	3.1391	Back Stutter	10.4021	Forward Stutter	8.01332	89	0.138031	0.0854982	0.0620204	0.0384377	0.0048985	0.00390769	0.00377814	0.00371701
2.8.0	4:3:2:1_125pg_Set 1 Amp 1_rep-405610	4	47078700	42865.5	0.132405	1.00624	44	31	23	15	38.7849	27.692	20.5567	12.9664	3.24016	Back Stutter	11.7931	Forward Stutter	7.83464	89	0.137148	0.0827653	0.0612898	0.0399031	0.00492111	0.00376778	0.00375072	0.0039362
2.8.0	4:3:2:1_125pg_Set 1 Amp 1_rep-408958	4	46862108	44575.8	0.366369	1.00992	44	32	24	15	38.6873	27.6779	20.5747	13.0602	3.09349	Back Stutter	11.877	Forward Stutter	6.92277	89	0.138589	0.0871135	0.0598982	0.0382036	0.00493357	0.00400558	0.00357856	0.00359681
2.8.0	4:3:2:1_125pg_Set 1 Amp 1_rep-578239	4	48046678	46439.3	0.395565	1.02119	45	32	24	15	38.6241	27.6776	20.6067	13.0916	3.10397	Back Stutter	12.6446	Forward Stutter	7.62087	89	0.138434	0.0865108	0.0614033	0.0405973	0.00483873	0.00390008	0.00362819	0.00385434
2.8.0	4:3:2:1_125pg_Set 1 Amp 1_rep-745758	4	47147799	43935.2	0.280117	1.00551	45	32	24	15	38.7301	27.7703	20.5724	12.9271	3.19868	Back Stutter	11.2328	Forward Stutter	6.9283	89	0.138217	0.0896565	0.0608857	0.0418782	0.00480763	0.00408907	0.0035962	0.00411252
2.8.0	4:3:2:1_125pg_Set 1 Amp 1_rep-748540	4	47550194	85948.1	0.113332	1.01254	45	32	24	15	38.7652	27.6842	20.5498	13.0008	3.14771	Back Stutter	10.5808	Forward Stutter	7.01675	89	0.14063	0.087707	0.0634335	0.0392634	0.00495693	0.00398203	0.0038235	0.00370411
2.8.0	4:3:2:1_125pg_Set 1 Amp 1_rep-882942	4	47615386	36404.2	0.42663	1.03644	45	32	24	15	38.5185	27.6514	20.6221	13.208	3.02802	Back Stutter	10.6335	Forward Stutter	8.45212	89	0.141408	0.0906653	0.0602984	0.0376929	0.00505655	0.004197	0.00353188	0.00342915
2.8.0	4:3:2:1_125pg_Set 1 Amp 1_rep-907150	4	46392523	74349.6	0.357479	1.00295	45	32	24	15	38.7903	27.7456	20.592	12.8721	3.15625	Back Stutter	10.8387	Forward Stutter	7.01786	89	0.140588	0.0894445	0.0604627	0.0401383	0.00494105	0.00408811	0.00355181	0.00388762
2.8.0	4:3:2:1_125pg_Set 1 Amp 2_rep-274872	4	76169682	121342	7.7605	1.00263	66	46	34	22	39.0153	27.5873	20.2519	13.1455	2.55402	Back Stutter	9.89498	Forward Stutter	6.77545	85	0.227636	0.143843	0.0934439	0.0560132	0.0059226	0.00484308	0.00397976	0.00355238
2.8.0	4:3:2:1_125pg_Set 1 Amp 2_rep-371049	4	76983277	112188	9.43596	1.00642	66	46	34	22	38.9927	27.4438	20.2355	13.328	2.52773	Back Stutter	10.9891	Forward Stutter	7.38965	85	0.229264	0.142443	0.0936558	0.0551066	0.00600097	0.00480152	0.00399658	0.0033856
2.8.0	4:3:2:1_125pg_Set 1 Amp 2_rep-405610	4	76313810	120100	7.99765	1.00622	66	46	34	22	39.3151	27.4644	20.1236	13.097	2.54433	Back Stutter	10.0797	Forward Stutter	7.87042	85	0.230697	0.138774	0.0907297	0.0555552	0.00599746	0.00460289	0.00385178	0.00352458
2.8.0	4:3:2:1_125pg_Set 1 Amp 2_rep-408958	4	77200701	101690	8.01001	1.00986	65	46	34	22	38.9613	27.5508	20.2338	13.2541	2.49477	Back Stutter	10.3296	Forward Stutter	7.40556	85	0.22631	0.143435	0.0908465	0.0542793	0.00591833	0.00486163	0.00386053	0.00337481
2.8.0	4:3:2:1_125pg_Set 1 Amp 2_rep-578239	4	74524862	170246	7.98059	1.0047	65	46	34	22	38.7971	27.5135	20.3533	13.336	2.52164	Back Stutter	11.5102	Forward Stutter	7.48621	85	0.223057	0.139884	0.0961019	0.0579486	0.00586375	0.00471971	0.00419252	0.00370241
2.8.0	4:3:2:1_125pg_Set 1 Amp 2_rep-745758	4	78185621	159930	7.97257	1.00543	65	46	34	22	38.9767	27.4812	20.2241	13.318	2.52615	Back Stutter	10.8003	Forward Stutter	7.27385	85	0.221869	0.136741	0.0890912	0.0558737	0.00579593	0.00457906	0.00379226	0.0035232
2.8.0	4:3:2:1_125pg_Set 1 Amp 2_rep-748540	4	77421688	129244	7.85689	1.01385	65	46	34	22	38.9447	27.4644	20.2729	13.318	2.49089	Back Stutter	10.2473	Forward Stutter	6.8507	85	0.225856	0.140179	0.0927402	0.0532322	0.00591601	0.00471674	0.00396389	0.00325716
2.8.0	4:3:2:1_125pg_Set 1 Amp 2_rep-882942	4	78294353	95149.6	7.81721	1.00795	65	46	34	22	38.9105	27.6168	20.2804	13.1923	2.47321	Back Stutter	9.26857	Forward Stutter	6.40606	85	0.224771	0.143173	0.0906387	0.0536104	0.00584562	0.0048276	0.00381259	0.00335521
2.8.0	4:3:2:1_125pg_Set 1 Amp 2_rep-907150	4	77039778	137360	7.87556	1.00455	66	46	34	22	39.0467	27.5066	20.1866	13.2601	2.56529	Back Stutter	10.4904	Forward Stutter	7.36922	85	0.227998	0.142159	0.0893026	0.0568642	0.00594942	0.00478726	0.00375365	0.00358609
2.8.0	4:3:2:1_250pg_Set 1 Amp 1_rep-274872	4	174964541	168117	22.4576	1.0277	104	78	61	43	36.2893	27.2961	21.5154	14.8993	2.69661	Back Stutter	11.1256	Forward Stutter	7.38144	85	0.311587	0.200536	0.134563	0.089086	0.00460705	0.0036426	0.00288974	0.00273098
2.8.0	4:3:2:1_250pg_Set 1 Amp 1_rep-371049	4	175885749	286209	22.6267	1.01256	107	80	63	43	36.4559	27.3527	21.4277	14.7637	2.69707	Back Stutter	10.5822	Forward Stutter	7.51173	85	0.325457	0.191711	0.139586	0.0884888	0.00469493	0.00325667	0.00295276	0.00264421
2.8.0	4:3:2:1_250pg_Set 1 Amp 1_rep-405610	4	175004575	204265	21.8324	1.00267	105	78	62	43	36.5156	27.1839	21.3843	14.9162	2.69279	Back Stutter	10.7595	Forward Stutter	7.25621	85	0.324131	0.180876	0.147235	0.0837891	0.00480136	0.00310281	0.00325274	0.00246817
2.8.0	4:3:2:1_250pg_Set 1 Amp 1_rep-408958	4	167881093	193967	22.8679	1.01129	106	79	62	43	36.5081	27.2348	21.415	14.8422	2.69938	Back Stutter	12.4524	Forward Stutter	7.08496	85	0.322592	0.188772	0.136775	0.0859601	0.00467955	0.00324276	0.00291505	0.0025445
2.8.0	4:3:2:1_250pg_Set 1 Amp 1_rep-578239	4	174730046	262047	21.3772	1.0028	106	80	63	43	36.4327	27.3929	21.5253	14.6491	2.67461	Back Stutter	11.0499	Forward Stutter	6.80458	85	0.316976	0.210418	0.125923	0.0930636	0.00453496	0.00376472	0.00256534	0.00287941
2.8.0	4:3:2:1_250pg_Set 1 Amp 1_rep-745758	4	173219933	185100	21.5116	1.0161	106	79	62	43	36.4689	27.1974	21.4087	14.925	2.77273	Back Stutter	10.2375	Forward Stutter	7.43431	85	0.326343	0.194714	0.136852	0.0854811	0.00479815	0.00340782	0.00291726	0.00251628
2.8.0	4:3:2:1_250pg_Set 1 Amp 1_rep-748540	4	170434986	175318	22.3003	1.00564	106	79	62	44	36.3982	27.2132	21.3717	15.0169	2.70614	Back Stutter	10.8138	Forward Stutter	6.98446	85	0.319145	0.199154	0.133676	0.0865454	0.00461562	0.00350952	0.00284038	0.0025272
2.8.0	4:3:2:1_250pg_Set 1 Amp 1_rep-882942	4	156556946	251313	21.7291	1.01169	107	80	62	42	36.7067	27.333	21.4056	14.5547	2.6962	Back Stutter	10.8688	Forward Stutter	6.88261	85	0.326281	0.202393	0.133531	0.0899713	0.0047009	0.00355907	0.00279874	0.00276778
2.8.0	4:3:2:1_250pg_Set 1 Amp 1_rep-907150	4	169963982	285244	22.6265	1.01171	108	80	63	44	36.5381	27.2669	21.4391	14.7559	2.70329	Back Stutter	10.9058	Forward Stutter	8.38384	85	0.329893	0.19584	0.141769	0.0870919	0.00475598	0.0033518	0.00307104	0.00257098
2.8.0	4:3:2:1_250pg_Set 1 Amp 2_rep-274872	4	333575006	119416	29.2148	1.00654	145	102	74	49	39.286	27.4297	19.9181	13.3663	2.97051	Back Stutter	10.0019	Forward Stutter	8.21788	85	0.369793	0.220426	0.153063	0.104161	0.00355314	0.00285399	0.00268676	0.00273582
2.8.0	4:3:2:1_250pg_Set 1 Amp 2_rep-371049	4	346435428	225434	27.5945	1.01191	147	102	74	50	39.5067	27.2952	19.8479	13.3502	3.00228	Back Stutter	9.79635	Forward Stutter	7.91773	85	0.406192	0.209117	0.158167	0.0980986	0.00400886	0.00264549	0.00279699	0.0025172
2.8.0	4:3:2:1_250pg_Set 1 Amp 2_rep-405610	4	321445943	195128	28.0369	1.00905	148	102	74	50	39.642	27.277	19.7608	13.3201	2.96924	Back Stutter	11.0459	Forward Stutter	7.56635	85	0.405365	0.221725	0.14933	0.0994502	0.00396641	0.00285418	0.00259543	0.00255274
2.8.0	4:3:2:1_250pg_Set 1 Amp 2_rep-408958	4	329542720	146961	28.0271	1.00554	147	102	74	50	39.3817	27.4146	19.9109	13.2929	2.99868	Back Stutter	10.0831	Forward Stutter	7.88219	85	0.395112	0.222007	0.147377	0.101412	0.00387609	0.00289014	0.00254689	0.00268525
2.8.0	4:3:2:1_250pg_Set 1 Amp 2_rep-578239	4	327060168	161867	27.9963	1.0094	148	102	74	49	39.7211	27.3439	19.839	13.0959	2.99698	Back Stutter	9.89781	Forward Stutter	6.60027	85	0.388992	0.215959	0.139498	0.101217	0.00374966	0.00281116	0.00238372	0.0027309
2.8.0	4:3:2:1_250pg_Set 1 Amp 2_rep-745758	4	345858659	118960	27.9789	1.00362	145	101	73	49	39.3402	27.3815	19.8798	13.3985	3.08001	Back Stutter	9.36819	Forward Stutter	7.27247	85	0.385349	0.212992	0.152996	0.100012	0.00378645	0.00273926	0.00270471	0.00259578
2.8.0	4:3:2:1_250pg_Set 1 Amp 2_rep-748540	4	324153608	186548	29.8764	1.00513	147	102	75	50	39.4139	27.3442	19.9391	13.3029	2.9948	Back Stutter	9.92051	Forward Stutter	9.03809	85	0.401986	0.214387	0.149377	0.103747	0.00395008	0.0027297	0.00256511	0.00272088
2.8.0	4:3:2:1_250pg_Set 1 Amp 2_rep-882942	4	353901968	189238	28.786	1.00909	147	102	75	51	39.1976	27.2966	20.0004	13.5054	2.93053	Back Stutter	9.17364	Forward Stutter	7.37424	85	0.38698	0.226299	0.154657	0.104909	0.00376225	0.00295139	0.00267789	0.00269074
2.8.0	4:3:2:1_250pg_Set 1 Amp 2_rep-907150	4	344866760	296369	27.6662	1.00336	148	102	74	50	39.4982	27.3497	19.8548	13.2972	2.92185	Back Stutter	10.402	Forward Stutter	7.02899	85	0.398923	0.215741	0.149028	0.101761	0.00389616	0.00274763	0.00257	0.00264677
2.8.0	4:3:2:1_380pg_Set 1 Amp 1_rep-274872	4	413948422	173199	31.4125	1.019	216	166	118	31	40.6329	31.2301	22.2708	5.86623	3.53197	Back Stutter	9.99354	Forward Stutter	9.17311	85	0.655175	0.365341	0.255963	0.0764245	0.00473066	0.00293415	0.00285284	0.00337745
2.8.0	4:3:2:1_380pg_Set 1 Amp 1_rep-371049	4	365680330	132161	32.1668	1.0367	212	164	114	30	40.7141	31.5812	21.9301	5.77459	3.50895	Back Stutter	11.7678	Forward Stutter	7.09828	85	0.550638	0.379505	0.268791	0.0800385	0.00385121	0.00321344	0.0031929	0.00386075
2.8.0	4:3:2:1_380pg_Set 1 Amp 1_rep-405610	4	431105972	220452	31.4502	1.04307	217	167	118	31	40.6289	31.4037	22.0575	5.90984	3.74116	Back Stutter	11.0581	Forward Stutter	6.53855	85	0.661644	0.360767	0.264619	0.0776632	0.00473472	0.00286746	0.0030126	0.00340847
2.8.0	4:3:2:1_380pg_Set 1 Amp 1_rep-408958	4	433411206	163647	30.804	1.02042	214	165	115	32	40.7507	31.3201	21.8365	6.09279	3.72316	Back Stutter	10.719	Forward Stutter	7.08415	85	0.583288	0.383753	0.266847	0.082493	0.00402668	0.00320851	0.00313333	0.00364586
2.8.0	4:3:2:1_380pg_Set 1 Amp 1_rep-578239	4	389350550	169307	30.3962	1.01036	214	165	118	30	40.6381	31.3231	22.2679	5.77092	3.55319	Back Stutter	10.6788	Forward Stutter	6.83223	85	0.622734	0.367381	0.260011	0.0798283	0.00443593	0.00301873	0.00295771	0.0037532
2.8.0	4:3:2:1_380pg_Set 1 Amp 1_rep-745758	4	386064652	182646	32.6321	1.01072	214	166	117	30	40.6726	31.4903	22.1613	5.67586	3.47367	Back Stutter	12.0116	Forward Stutter	6.63151	85	0.587638	0.389359	0.257937	0.0748186	0.00407301	0.00329118	0.00295259	0.00348694
2.8.0	4:3:2:1_380pg_Set 1 Amp 1_rep-748540	4	428162058	184523	31.3889	1.0339	218	168	117	30	40.9262	31.5452	21.8964	5.63214	3.51793	Back Stutter	11.7475	Forward Stutter	7.13265	85	0.634166	0.348398	0.279714	0.0765666	0.00442205	0.00278376	0.00328501	0.00372482
2.8.0	4:3:2:1_380pg_Set 1 Amp 1_rep-882942	4	422322742	160241	31.1623	1.0118	214	167	120	29	40.4358	31.4528	22.6515	5.45995	3.38355	Back Stutter	10.628	Forward Stutter	7.18301	85	0.596203	0.416669	0.25224	0.077722	0.00409153	0.00349932	0.00277471	0.00393285
2.8.0	4:3:2:1_380pg_Set 1 Amp 1_rep-907150	4	381661790	136450	30.0289	1.00476	215	166	117	31	40.6392	31.3114	22.1231	5.9263	3.75892	Back Stutter	11.1467	Forward Stutter	6.66692	85	0.612893	0.407822	0.264869	0.078237	0.00425413	0.00342377	0.00303742	0.00345486
2.8.0	4:3:2:1_380pg_Set 1 Amp 2_rep-274872	4	432867675	245607	31.623	1.01252	191	146	110	71	36.8385	28.2259	21.2392	13.6965	3.45259	Back Stutter	12.425	Forward Stutter	6.11212	85	0.508234	0.392374	0.293867	0.152434	0.00393951	0.00396068	0.00382864	0.00280999
2.8.0	4:3:2:1_380pg_Set 1 Amp 2_rep-371049	4	378328030	162166	33.5144	1.0158	192	147	111	71	36.8034	28.248	21.2924	13.6562	3.44732	Back Stutter	12.626	Forward Stutter	7.52831	85	0.572371	0.367902	0.262695	0.162261	0.00472881	0.00368045	0.00335226	0.00304228
2.8.0	4:3:2:1_380pg_Set 1 Amp 2_rep-405610	4	397736180	166589	32.5261	1.0125	192	147	109	70	37.0772	28.2896	21.0434	13.5898	3.38581	Back Stutter	12.5693	Forward Stutter	7.13506	85	0.502801	0.385659	0.286923	0.153127	0.00389179	0.00393117	0.00375225	0.00285786
2.8.0	4:3:2:1_380pg_Set 1 Amp 2_rep-408958	4	393486168	198411	33.012	1.0061	192	147	109	70	37.0435	28.371	21.067	13.5185	3.26143	Back Stutter	12.5	Forward Stutter	6.81678	85	0.532918	0.331397	0.302426	0.155441	0.00420954	0.00318201	0.00405803	0.00294269
2.8.0	4:3:2:1_380pg_Set 1 Amp 2_rep-578239	4	396704343	154366	32.8676	1.02667	190	145	109	71	36.9168	28.1281	21.1887	13.7665	3.49709	Back Stutter	12.7677	Forward Stutter	8.50713	85	0.46666	0.406453	0.290634	0.156421	0.00345829	0.00417291	0.00382992	0.00291815
2.8.0	4:3:2:1_380pg_Set 1 Amp 2_rep-745758	4	407570634	178913	32.6942	1.00446	194	149	113	72	36.674	28.2855	21.397	13.6434	3.31042	Back Stutter	12.3367	Forward Stutter	7.95483	85	0.595254	0.395282	0.27187	0.155898	0.00483288	0.00382221	0.00340904	0.0028324
2.8.0	4:3:2:1_380pg_Set 1 Amp 2_rep-748540	4	385905530	180866	32.6421	1.00652	193	148	110	71	37.0526	28.346	21.0092	13.5921	3.22264	Back Stutter	13.5125	Forward Stutter	7.42902	85	0.565243	0.329342	0.305809	0.156724	0.00454858	0.00312233	0.00409397	0.00292076
2.8.0	4:3:2:1_380pg_Set 1 Amp 2_rep-882942	4	379438403	176329	33.2051	1.00701	191	147	109	71	36.837	28.3375	21.1242	13.7012	3.29884	Back Stutter	12.4637	Forward Stutter	7.17374	85	0.522164	0.370323	0.290754	0.151731	0.00415476	0.00373906	0.00382568	0.00279077
2.8.0	4:3:2:1_380pg_Set 1 Amp 2_rep-907150	4	440752523	132667	33.6469	1.01185	193	148	110	71	36.9558	28.3311	21.1348	13.5783	3.58152	Back Stutter	13.0898	Forward Stutter	6.62192	85	0.567142	0.365784	0.300161	0.149198	0.00447938	0.0034738	0.00394175	0.00273797
2.8.0	4:3:2:1_500pg_Set 1 Amp 1_rep-274872	4	374336066	127246	32.2213	1.00531	233	180	127	65	38.5426	29.7776	20.9389	10.741	3.76867	Back Stutter	11.603	Forward Stutter	6.97901	85	0.73768	0.432379	0.314671	0.148267	0.00503125	0.00334028	0.00343867	0.00304761
2.8.0	4:3:2:1_500pg_Set 1 Amp 1_rep-371049	4	376835462	142887	32.7437	1.01513	234	181	127	65	38.6477	29.7971	20.8978	10.6573	3.79579	Back Stutter	12.3384	Forward Stutter	6.80531	85	0.714623	0.468599	0.310525	0.138681	0.00479062	0.00372701	0.00337104	0.00281734
2.8.0	4:3:2:1_500pg_Set 1 Amp 1_rep-405610	4	411119742	156143	32.6991	1.01219	232	178	125	65	38.6775	29.6697	20.8247	10.8281	3.96048	Back Stutter	11.701	Forward Stutter	6.70939	85	0.724368	0.447702	0.308119	0.135459	0.00490895	0.00352077	0.00340403	0.00269919
2.8.0	4:3:2:1_500pg_Set 1 Amp 1_rep-408958	4	363491821	182785	33.0167	1.01407	233	179	125	64	38.7713	29.7147	20.8037	10.7102	3.83062	Back Stutter	12.256	Forward Stutter	7.65531	85	0.668044	0.496319	0.307744	0.136575	0.00432218	0.00408894	0.00341149	0.00276729
2.8.0	4:3:2:1_500pg_Set 1 Amp 1_rep-578239	4	348446128	140282	34.063	1.01829	236	181	127	65	38.7777	29.7191	20.7931	10.7101	3.82834	Back Stutter	13.0999	Forward Stutter	7.19918	85	0.693022	0.480167	0.316392	0.150919	0.00450131	0.00385498	0.00348501	0.00313187
2.8.0	4:3:2:1_500pg_Set 1 Amp 1_rep-745758	4	402115730	113697	33.4536	1.00526	235	180	127	63	38.8285	29.7704	21.0011	10.4	3.79948	Back Stutter	11.2052	Forward Stutter	7.1152	85	0.721977	0.469196	0.3131	0.131155	0.00478107	0.00368488	0.00339684	0.00275673
2.8.0	4:3:2:1_500pg_Set 1 Amp 1_rep-748540	4	416449805	125992	33.5794	1.00893	235	182	128	63	38.6572	29.8922	21.0533	10.3972	3.48465	Back Stutter	11.8288	Forward Stutter	7.04617	85	0.686951	0.477251	0.32171	0.136141	0.00443573	0.00375901	0.00349987	0.00285844
2.8.0	4:3:2:1_500pg_Set 1 Amp 1_rep-882942	4	357208459	142010	32.3588	1.00716	234	180	128	64	38.6019	29.7082	21.0625	10.6273	3.70908	Back Stutter	11.6385	Forward Stutter	7.32938	85	0.717955	0.480961	0.298568	0.132319	0.00477854	0.00387328	0.0031879	0.00265098
2.8.0	4:3:2:1_500pg_Set 1 Amp 1_rep-907150	4	374135048	217820	32.6766	1.01921	237	182	128	66	38.6355	29.696	20.9567	10.7118	3.72053	Back Stutter	12.0103	Forward Stutter	6.75918	85	0.781745	0.451249	0.306595	0.138994	0.00541513	0.00345115	0.00326154	0.00275855
2.8.0	4:3:2:1_500pg_Set 1 Amp 2_rep-274872	4	483601650	124266	42.4583	1.03283	318	243	166	66	40.1246	30.6541	20.8548	8.36651	3.93801	Back Stutter	6.84961	Forward Stutter	7.15525	85	0.781835	0.504309	0.367066	0.132617	0.003467	0.00275603	0.00294744	0.0025544
2.8.0	4:3:2:1_500pg_Set 1 Amp 2_rep-371049	4	484586287	105452	42.0121	1.01588	316	245	173	65	39.6181	30.6176	21.5698	8.19444	3.77869	Back Stutter	6.11117	Forward Stutter	7.32004	85	0.840862	0.516503	0.33788	0.127214	0.00392724	0.00280008	0.00265781	0.00246899
2.8.0	4:3:2:1_500pg_Set 1 Amp 2_rep-405610	4	516829805	126684	41.4444	1.03376	319	246	173	67	39.6268	30.5526	21.505	8.31567	4.04921	Back Stutter	6.8828	Forward Stutter	6.66619	85	0.833483	0.561656	0.335049	0.13279	0.00378826	0.00306808	0.00257801	0.00253335
2.8.0	4:3:2:1_500pg_Set 1 Amp 2_rep-408958	4	525467956	168926	42.5367	1.04472	314	242	170	65	39.741	30.5529	21.4868	8.21929	3.7393	Back Stutter	6.30088	Forward Stutter	7.89889	85	0.758142	0.506261	0.379108	0.120443	0.00340225	0.00281604	0.00300911	0.00231784
2.8.0	4:3:2:1_500pg_Set 1 Amp 2_rep-578239	4	410884181	160097	42.4312	1.04284	310	238	166	66	39.8094	30.4837	21.2912	8.41564	3.89352	Back Stutter	6.71369	Forward Stutter	6.56118	85	0.591128	0.590238	0.363918	0.127119	0.00241392	0.00350165	0.00293878	0.00245094
2.8.0	4:3:2:1_500pg_Set 1 Amp 2_rep-745758	4	505125493	98366.8	42.7654	1.03909	316	241	159	66	40.3939	30.7964	20.4174	8.39224	3.97569	Back Stutter	7.45824	Forward Stutter	6.57108	85	0.684355	0.517252	0.369853	0.122382	0.00289047	0.00286385	0.00314815	0.00234217
2.8.0	4:3:2:1_500pg_Set 1 Amp 2_rep-748540	4	517947729	120194	43.2885	1.02253	321	247	176	66	39.6241	30.5694	21.7044	8.10212	3.68535	Back Stutter	6.12937	Forward Stutter	7.13098	85	0.864574	0.527438	0.345954	0.127002	0.00395472	0.00286941	0.00262659	0.00245765
2.8.0	4:3:2:1_500pg_Set 1 Amp 2_rep-882942	4	567773918	122234	42.6714	1.01178	315	242	167	65	39.9441	30.6186	21.1411	8.2962	3.80366	Back Stutter	6.56373	Forward Stutter	6.28185	85	0.79802	0.497133	0.368581	0.125181	0.00356501	0.00267658	0.00291824	0.00241187
2.8.0	4:3:2:1_500pg_Set 1 Amp 2_rep-907150	4	513810564	165672	43.5658	1.03223	319	245	171	65	39.8487	30.6884	21.3297	8.13318	3.65765	Back Stutter	6.62814	Forward Stutter	7.37803	85	0.880687	0.418097	0.381473	0.122286	0.00406554	0.00215434	0.00298331	0.00236367
2.8.0	4:3:2:1_750pg_Set 1 Amp 1_rep-274872	4	1139548018	248968	46.8644	1.00866	326	274	227	82	35.8604	30.1861	24.9626	8.99093	2.6587	Back Stutter	10.3853	Forward Stutter	7.9792	85	0.701908	0.693114	0.450148	0.196871	0.00301297	0.00426353	0.00298229	0.00328951
2.8.0	4:3:2:1_750pg_Set 1 Amp 1_rep-371049	4	1033138067	148496	47.2589	1.01318	326	274	220	82	36.1403	30.3846	24.3845	9.09068	2.68162	Back Stutter	10.4467	Forward Stutter	8.45876	85	0.675451	0.427078	0.682852	0.194521	0.00289063	0.00195911	0.00520477	0.00321854
2.8.0	4:3:2:1_750pg_Set 1 Amp 1_rep-405610	4	1117125587	220177	46.6416	1.00489	321	270	216	81	36.1857	30.4152	24.2748	9.12424	2.72045	Back Stutter	10.541	Forward Stutter	7.01043	85	0.653247	0.444916	0.670595	0.187965	0.00264684	0.00213762	0.00505792	0.00311765
2.8.0	4:3:2:1_750pg_Set 1 Amp 1_rep-408958	4	971156527	182351	46.2006	1.00419	323	272	217	81	36.1828	30.4424	24.2633	9.11152	2.72077	Back Stutter	10.5634	Forward Stutter	8.63674	85	0.713902	0.41069	0.610148	0.191446	0.0032702	0.00192374	0.00465446	0.00318732
2.8.0	4:3:2:1_750pg_Set 1 Amp 1_rep-578239	4	1138636138	190271	46.9369	1.00633	325	274	222	83	35.9748	30.266	24.5964	9.1628	2.75223	Back Stutter	11.0384	Forward Stutter	7.27529	85	0.749593	0.551723	0.527427	0.204717	0.00346303	0.00293007	0.00363184	0.00340855
2.8.0	4:3:2:1_750pg_Set 1 Amp 1_rep-745758	4	1095515065	151627	46.1632	1.00705	326	273	222	82	36.0761	30.25	24.5765	9.09742	2.72315	Back Stutter	10.9252	Forward Stutter	6.92411	85	0.67312	0.597264	0.553416	0.199782	0.00273506	0.00335417	0.00398119	0.00332893
2.8.0	4:3:2:1_750pg_Set 1 Amp 1_rep-748540	4	1412784619	187468	48.8145	1.00698	324	272	217	83	36.176	30.3582	24.2325	9.23332	2.72015	Back Stutter	10.7195	Forward Stutter	8.96874	85	0.716895	0.464177	0.627471	0.202737	0.00315265	0.00212481	0.00458679	0.00337068
2.8.0	4:3:2:1_750pg_Set 1 Amp 1_rep-882942	4	1306460818	132991	46.3221	1.01252	328	276	225	82	35.9712	30.2748	24.7259	9.02818	2.76089	Back Stutter	9.84994	Forward Stutter	7.20168	85	0.820212	0.565244	0.51267	0.19733	0.00380284	0.00298857	0.00339126	0.00327174
2.8.0	4:3:2:1_750pg_Set 1 Amp 1_rep-907150	4	1332072541	254019	46.1686	1.01048	324	273	218	80	36.199	30.4639	24.3553	8.9817	2.71719	Back Stutter	10.9371	Forward Stutter	8.23891	85	0.830722	0.412993	0.578939	0.192449	0.00393577	0.00187875	0.00401355	0.00325946
2.8.0	4:3:2:1_750pg_Set 1 Amp 2_rep-274872	4	581041003	219285	42.9365	1.00531	354	264	186	111	38.678	28.8168	20.3397	12.1655	4.54239	Back Stutter	9.61732	Forward Stutter	7.26734	85	0.66725	0.56478	0.479143	0.274876	0.00240773	0.00293234	0.00367435	0.0034245
2.8.0	4:3:2:1_750pg_Set 1 Amp 2_rep-371049	4	638812301	86481.6	41.9254	1.01555	357	265	188	110	38.7785	28.8112	20.4363	11.9739	4.3805	Back Stutter	9.33308	Forward Stutter	7.18311	85	0.674793	0.603044	0.430302	0.275123	0.00241245	0.0031596	0.00314779	0.0034701
2.8.0	4:3:2:1_750pg_Set 1 Amp 2_rep-405610	4	636545771	68367.3	44.0342	1.01197	359	269	189	113	38.5838	28.9158	20.333	12.1674	4.4741	Back Stutter	9.48707	Forward Stutter	6.49701	85	0.752719	0.547537	0.49383	0.277051	0.00275039	0.00274898	0.00372139	0.00338051
2.8.0	4:3:2:1_750pg_Set 1 Amp 2_rep-408958	4	558018613	95984.3	41.3916	1.03075	354	265	186	111	38.6563	28.9817	20.2878	12.0742	4.49335	Back Stutter	9.36512	Forward Stutter	7.77413	85	0.687009	0.530895	0.466054	0.283316	0.0025017	0.00263229	0.00349509	0.00359252
2.8.0	4:3:2:1_750pg_Set 1 Amp 2_rep-578239	4	728656599	108327	43.457	1.01749	354	264	188	109	38.7033	28.8443	20.5801	11.8722	4.6207	Back Stutter	9.35669	Forward Stutter	6.49498	85	0.667279	0.660354	0.42711	0.264701	0.00239695	0.00351471	0.00306699	0.00334352
2.8.0	4:3:2:1_750pg_Set 1 Amp 2_rep-745758	4	645134152	138232	40.9501	1.02469	359	268	191	113	38.5273	28.8175	20.4859	12.1692	4.57723	Back Stutter	9.74733	Forward Stutter	6.85874	85	0.77389	0.574994	0.447834	0.292217	0.00292779	0.00302661	0.00330204	0.0036302
2.8.0	4:3:2:1_750pg_Set 1 Amp 2_rep-748540	4	612497646	183913	43.8361	1.03468	357	265	189	111	38.697	28.7928	20.4465	12.0636	4.68371	Back Stutter	9.5365	Forward Stutter	7.08385	85	0.707004	0.60599	0.450912	0.269592	0.00256926	0.00312298	0.00329356	0.00335069
2.8.0	4:3:2:1_750pg_Set 1 Amp 2_rep-882942	4	726244174	104390	41.7387	1.0049	356	267	189	110	38.6114	28.9487	20.5381	11.9019	4.71404	Back Stutter	9.43221	Forward Stutter	6.93139	85	0.754627	0.604025	0.425688	0.277986	0.00279398	0.00309897	0.00301687	0.00354266
2.8.0	4:3:2:1_750pg_Set 1 Amp 2_rep-907150	4	684695643	140696	41.7772	1.02676	354	264	189	109	38.6142	28.837	20.6728	11.876	4.52378	Back Stutter	9.68064	Forward Stutter	7.98336	85	0.683096	0.639598	0.424118	0.270971	0.00247993	0.00332789	0.00306997	0.00346277
2.8.0	4:3:2:1_870pg_Set 1 Amp 1_rep-274872	4	619141433	110496	47.56	1.01599	429	319	185	124	40.5475	30.1745	17.5122	11.7657	3.91693	Back Stutter	6.27849	Forward Stutter	6.94841	85	1.13555	0.603072	0.564567	0.286756	0.00414123	0.00277833	0.00472267	0.00309583
2.8.0	4:3:2:1_870pg_Set 1 Amp 1_rep-371049	4	659893655	136897	45.9224	1.00894	426	312	189	127	40.405	29.6253	17.9444	12.0253	3.86012	Back Stutter	6.23053	Forward Stutter	7.52984	85	0.865489	0.810429	0.576736	0.288167	0.00279855	0.00397742	0.00473231	0.00304516
2.8.0	4:3:2:1_870pg_Set 1 Amp 1_rep-405610	4	479580875	189968	46.1272	1.00965	446	337	188	125	40.6878	30.6966	17.1675	11.4481	3.67937	Back Stutter	6.17575	Forward Stutter	7.26311	85	1.45885	0.412629	0.605769	0.296128	0.00562547	0.00159613	0.00517358	0.00319797
2.8.0	4:3:2:1_870pg_Set 1 Amp 1_rep-408958	4	674587890	160023	46.9482	1.00583	417	303	187	126	40.3638	29.3241	18.1308	12.1813	3.94546	Back Stutter	6.37629	Forward Stutter	7.1732	85	0.795998	0.800247	0.545118	0.29268	0.0025406	0.00396087	0.00442841	0.00313626
2.8.0	4:3:2:1_870pg_Set 1 Amp 1_rep-578239	4	600334579	110741	46.2097	1.00392	438	326	190	127	40.5613	30.1201	17.5662	11.7524	3.70872	Back Stutter	6.29128	Forward Stutter	6.67273	85	1.23478	0.601759	0.59858	0.298745	0.00449636	0.00264904	0.00501087	0.00318763
2.8.0	4:3:2:1_870pg_Set 1 Amp 1_rep-745758	4	481225656	130053	46.1093	1.00447	419	310	181	121	40.625	30.0656	17.5506	11.7587	3.83924	Back Stutter	6.15646	Forward Stutter	7.5591	85	0.971824	0.675463	0.553016	0.271847	0.00341788	0.00321854	0.00473749	0.00297758
2.8.0	4:3:2:1_870pg_Set 1 Amp 1_rep-748540	4	564789134	168961	46.5577	1.01176	430	320	185	123	40.6146	30.2263	17.4811	11.6779	3.80095	Back Stutter	6.36681	Forward Stutter	7.28601	85	1.18615	0.572658	0.575437	0.283487	0.00440237	0.00259231	0.00488523	0.00307663
2.8.0	4:3:2:1_870pg_Set 1 Amp 1_rep-882942	4	575285528	150892	46.451	1.03368	426	317	187	124	40.4304	30.0242	17.7293	11.8162	3.73833	Back Stutter	6.30152	Forward Stutter	7.93862	85	1.01166	0.677981	0.586982	0.286838	0.00353974	0.00316759	0.00497382	0.00309654
2.8.0	4:3:2:1_870pg_Set 1 Amp 1_rep-907150	4	644535884	176835	47.4571	1.01497	424	310	188	126	40.4429	29.575	17.9771	12.005	3.86018	Back Stutter	6.12962	Forward Stutter	7.21982	85	0.909476	0.754504	0.589093	0.287007	0.00301157	0.00357772	0.00492447	0.00305131
2.8.0	4:3:2:1_870pg_Set 1 Amp 2_rep-53278	4	538407827	107172	48.3688	1.06617	436	319	248	138	38.2283	27.9296	21.7367	12.1054	4.86406	Back Stutter	7.99556	Forward Stutter	8.25452	85	1.18186	0.643476	0.503377	0.21182	0.00419688	0.002709	0.00269546	0.00182919
2.8.0	4:3:2:1_870pg_Set 1 Amp 2_rep-274872	4	636092192	87485	48.2609	1.00744	433	315	242	136	38.4728	27.9678	21.4775	12.082	4.88782	Back Stutter	8.04038	Forward Stutter	7.00342	85	1.04407	0.710579	0.513074	0.20412	0.00336704	0.00310176	0.00277657	0.00178088
2.8.0	4:3:2:1_870pg_Set 1 Amp 2_rep-371049	4	501612641	86887.7	47.4168	1.06874	437	317	242	136	38.6402	27.974	21.4107	11.9751	4.94975	Back Stutter	8.35944	Forward Stutter	7.74709	85	1.21526	0.635628	0.509365	0.203197	0.004174	0.00264839	0.00284226	0.00178445
2.8.0	4:3:2:1_870pg_Set 1 Amp 2_rep-405610	4	507597092	65518.9	48.7215	1.04844	434	315	242	136	38.4573	27.9458	21.4947	12.1022	4.84795	Back Stutter	7.94285	Forward Stutter	6.95575	85	1.03654	0.738894	0.490922	0.201188	0.00333694	0.00327193	0.00261383	0.00174469
2.8.0	4:3:2:1_870pg_Set 1 Amp 2_rep-408958	4	759945299	93302.1	48.5878	1.02126	437	321	248	139	38.1891	27.9974	21.664	12.1496	5.00124	Back Stutter	8.95153	Forward Stutter	7.99786	85	1.28688	0.663676	0.519358	0.216139	0.00448097	0.00270561	0.00272125	0.00186009
2.8.0	4:3:2:1_870pg_Set 1 Amp 2_rep-578239	4	675058700	80955.6	48.5041	1.02491	430	314	242	137	38.3067	27.9338	21.5921	12.1674	4.91074	Back Stutter	8.29131	Forward Stutter	7.10332	85	1.00224	0.768748	0.482911	0.207853	0.00319265	0.00345879	0.00257394	0.00181339
2.8.0	4:3:2:1_870pg_Set 1 Amp 2_rep-745758	4	717689147	119664	48.04	1.05503	437	320	247	139	38.2895	27.99	21.5846	12.1359	4.85811	Back Stutter	8.22031	Forward Stutter	7.05325	85	1.30491	0.56357	0.493669	0.2151	0.00462915	0.00229107	0.00258282	0.00185704
2.8.0	4:3:2:1_870pg_Set 1 Amp 2_rep-748540	4	558637329	117736	48.3507	1.00711	431	311	240	132	38.6964	27.9133	21.5137	11.8766	4.89959	Back Stutter	7.59118	Forward Stutter	6.48887	85	1.07296	0.675304	0.525409	0.200707	0.0035409	0.00289737	0.00290648	0.00181029
2.8.0	4:3:2:1_870pg_Set 1 Amp 2_rep-882942	4	552316138	117217	47.9019	1.0269	435	317	243	139	38.3615	27.9516	21.4632	12.2237	4.57293	Back Stutter	8.58372	Forward Stutter	7.44328	85	1.2181	0.436566	0.602528	0.21927	0.00417906	0.00164872	0.00343019	0.00189888
2.8.0	4:3:2:1_870pg_Set 1 Amp 2_rep-907150	4	450517369	81045.7	50.0344	1.04207	437	315	242	137	38.6215	27.8584	21.3668	12.1534	4.67385	Back Stutter	8.18026	Forward Stutter	7.89807	85	1.14216	0.530591	0.563367	0.212992	0.00382722	0.00211362	0.00317375	0.00185569
2.8.0	4-3-2-1_2ng_Set 2 Amp 1_rep-35262	4	578138839	181727	63.952	1.02492	1000	708	464	318	40.1529	28.4446	18.6396	12.7629	5.677	Back Stutter	4.677	Forward Stutter	7.80756	85	2.9551	1.4742	1.29754	0.619869	0.00447654	0.0026962	0.00410983	0.0024796
2.8.0	4-3-2-1_2ng_Set 2 Amp 1_rep-104565	4	607228153	131388	66.2092	1.01224	991	704	458	311	40.2114	28.5818	18.5996	12.6072	5.5837	Back Stutter	4.6327	Forward Stutter	6.83231	85	2.95247	1.50902	1.08558	0.663695	0.00453308	0.00280233	0.00326106	0.0027941
2.8.0	4-3-2-1_2ng_Set 2 Amp 1_rep-562810	4	568519988	161555	64.9461	1.01454	1001	711	466	319	40.0948	28.4685	18.6507	12.7861	5.66918	Back Stutter	4.67273	Forward Stutter	8.69207	85	2.97338	1.57385	1.18658	0.666426	0.00450711	0.00292848	0.00360087	0.00271255
2.8.0	4-3-2-1_2ng_Set 2 Amp 1_rep-626603	4	605258343	142948	64.7159	1.01717	990	705	461	316	40.0545	28.5247	18.6469	12.7739	5.91805	Back Stutter	4.66899	Forward Stutter	8.08819	85	2.89863	1.49169	1.16217	0.648243	0.00440967	0.00275377	0.00353264	0.0026573
2.8.0	4-3-2-1_2ng_Set 2 Amp 1_rep-655450	4	548656673	147569	63.7981	1.01457	997	710	459	313	40.2322	28.6288	18.5169	12.6221	5.71731	Back Stutter	4.69088	Forward Stutter	6.84553	85	2.96206	1.48674	1.20232	0.61249	0.00451002	0.00271583	0.00373894	0.0025075
2.8.0	4-3-2-1_2ng_Set 2 Amp 1_rep-803747	4	594260777	143635	65.2451	1.01825	1020	724	467	321	40.2903	28.5866	18.4521	12.6711	5.70388	Back Stutter	4.71568	Forward Stutter	7.78021	85	3.09576	1.59511	1.29173	0.601468	0.00466966	0.00290591	0.00412034	0.00241291
2.8.0	4-3-2-1_2ng_Set 2 Amp 1_rep-874844	4	608366696	154242	65.2131	1.02011	1006	714	465	321	40.1638	28.4815	18.5396	12.8151	5.67677	Back Stutter	4.6679	Forward Stutter	9.30273	85	3.02855	1.57923	1.23243	0.62626	0.00460682	0.00292991	0.00388571	0.00252064
2.8.0	4-3-2-1_2ng_Set 2 Amp 1_rep-887628	4	521166953	126810	65.0152	1.01323	990	708	456	316	40.0671	28.6698	18.4733	12.7898	5.5126	Back Stutter	4.68415	Forward Stutter	9.3784	85	2.91212	1.47993	1.23117	0.639891	0.00443877	0.00270601	0.00388091	0.00260094
2.8.0	4-3-2-1_2ng_Set 2 Amp 1_rep-952324	4	472246478	103684	63.6208	1.00375	989	711	460	315	39.9527	28.7123	18.5917	12.7433	5.74993	Back Stutter	4.70936	Forward Stutter	7.627	85	2.8775	1.4805	1.23725	0.640757	0.00436577	0.00269739	0.00386646	0.00260856
2.8.0	4-3-2-1_2ng_Set 2 Amp 1_rep-960932	4	624040465	153962	65.2583	1.00417	991	704	462	314	40.1097	28.4915	18.678	12.7209	5.77935	Back Stutter	4.68742	Forward Stutter	7.84723	85	2.92567	1.58337	1.15538	0.654419	0.0044621	0.00299678	0.00350851	0.00270025
2.8.0	4-3-2-1_2ng_Set 2 Amp 2_rep-35262	4	766729642	153001	81.4395	1.02917	1366	1059	537	331	41.4834	32.1563	16.3038	10.0565	4.00876	Back Stutter	6.49055	Forward Stutter	6.85231	85	4.15378	2.59915	1.32095	0.588263	0.00468398	0.00337573	0.00341594	0.00221614
2.8.0	4-3-2-1_2ng_Set 2 Amp 2_rep-104565	4	916935951	120592	80.5618	1.02484	1354	1041	536	328	41.5391	31.9452	16.4473	10.0683	3.85055	Back Stutter	6.35018	Forward Stutter	7.15762	85	4.05437	2.52307	1.20918	0.610069	0.00456807	0.00331636	0.00304281	0.00234158
2.8.0	4-3-2-1_2ng_Set 2 Amp 2_rep-562810	4	765206902	98449.9	81.3982	1.04816	1349	1045	533	329	41.4312	32.0999	16.3677	10.1012	3.91294	Back Stutter	6.50717	Forward Stutter	7.35094	85	4.029	2.51912	1.24602	0.617784	0.00455184	0.00329084	0.00317211	0.00236655
2.8.0	4-3-2-1_2ng_Set 2 Amp 2_rep-626603	4	897025410	112855	81.1974	1.01447	1364	1059	547	331	41.323	32.0907	16.5693	10.017	3.92534	Back Stutter	6.5004	Forward Stutter	6.72953	85	4.10511	2.56563	1.33435	0.595628	0.00460649	0.00331275	0.00337598	0.0022563
2.8.0	4-3-2-1_2ng_Set 2 Amp 2_rep-655450	4	641740758	86436.1	81.7008	1.01424	1368	1060	539	332	41.4682	32.1239	16.3336	10.0743	4.0413	Back Stutter	6.42433	Forward Stutter	6.94758	85	4.16862	2.63534	1.33716	0.593929	0.00470204	0.00344085	0.00346729	0.00224245
2.8.0	4-3-2-1_2ng_Set 2 Amp 2_rep-803747	4	716375678	85333.9	80.7977	1.01715	1365	1058	536	331	41.5032	32.1455	16.2966	10.0547	3.84105	Back Stutter	6.48261	Forward Stutter	7.13176	85	4.14834	2.58918	1.26228	0.631061	0.00467737	0.00336287	0.00320392	0.00241553
2.8.0	4-3-2-1_2ng_Set 2 Amp 2_rep-874844	4	712747464	104099	80.4103	1.01333	1360	1054	541	331	41.3779	32.0775	16.4651	10.0796	4.02679	Back Stutter	6.45313	Forward Stutter	6.88341	85	4.13703	2.59206	1.34509	0.613243	0.00468798	0.00338403	0.00344013	0.00231318
2.8.0	4-3-2-1_2ng_Set 2 Amp 2_rep-887628	4	933773972	86824.6	82.8705	1.01903	1381	1069	544	334	41.5068	32.1241	16.3361	10.0329	3.99947	Back Stutter	6.41075	Forward Stutter	8.01432	85	4.23232	2.65301	1.35381	0.594086	0.00474798	0.00343129	0.00348283	0.00223125
2.8.0	4-3-2-1_2ng_Set 2 Amp 2_rep-952324	4	816839428	111179	80.6589	1.02651	1365	1055	529	332	41.6102	32.1558	16.1124	10.1216	3.9363	Back Stutter	6.39525	Forward Stutter	6.45068	85	4.16241	2.59032	1.19627	0.653149	0.00470556	0.00337784	0.00302837	0.00250905
2.8.0	4-3-2-1_2ng_Set 2 Amp 2_rep-960932	4	695289186	132416	81.9272	1.06667	1369	1057	544	331	41.4743	32.0281	16.477	10.0205	4.0213	Back Stutter	6.48252	Forward Stutter	6.68717	85	4.20889	2.62686	1.41682	0.563485	0.00477429	0.00343772	0.00374827	0.0021175
2.8.0	4-3-2-1_63pg_Set 2 Amp 1_rep-35262	4	51447594	101789	0.411274	1.00457	44	31	23	15	38.9777	27.5943	20.4605	12.9675	3.07524	Back Stutter	11.5238	Forward Stutter	7.64895	89	0.125636	0.0799664	0.0551535	0.0386302	0.00419999	0.00360046	0.00322986	0.00375184
2.8.0	4-3-2-1_63pg_Set 2 Amp 1_rep-104565	4	51282218	81918.4	0.245873	1.04564	43	30	23	15	39.1135	27.4426	20.3717	13.0722	3.02601	Back Stutter	11.3248	Forward Stutter	7.45111	89	0.132793	0.0783049	0.0571236	0.0352533	0.00476305	0.00363912	0.00353729	0.00338645
2.8.0	4-3-2-1_63pg_Set 2 Amp 1_rep-562810	4	50672918	122050	0.364011	1.01709	44	31	23	15	39.0689	27.4696	20.3591	13.1024	3.00249	Back Stutter	11.2259	Forward Stutter	6.70602	89	0.132835	0.0829147	0.0542646	0.0367992	0.00457647	0.00380422	0.00319481	0.00344514
2.8.0	4-3-2-1_63pg_Set 2 Amp 1_rep-626603	4	52728228	69414.7	0.80698	1.00968	44	31	23	15	38.7739	27.5214	20.5033	13.2014	2.99043	Back Stutter	10.5585	Forward Stutter	7.48297	89	0.123712	0.0789351	0.0548007	0.0380448	0.00419696	0.00357748	0.00323801	0.00360637
2.8.0	4-3-2-1_63pg_Set 2 Amp 1_rep-655450	4	51827481	66582.1	0.277099	1.03434	44	31	23	15	38.8363	27.4313	20.4165	13.3159	3.01951	Back Stutter	11.755	Forward Stutter	7.18476	89	0.130673	0.0832007	0.0558041	0.0353105	0.00454727	0.00386481	0.0033379	0.0031864
2.8.0	4-3-2-1_63pg_Set 2 Amp 1_rep-803747	4	51588462	153262	0.289516	1.0186	44	31	23	15	39.0735	27.4058	20.3674	13.1533	3.1649	Back Stutter	12.7051	Forward Stutter	8.43999	89	0.130876	0.0758536	0.0531366	0.03607	0.00461151	0.00344797	0.00315884	0.00341204
2.8.0	4-3-2-1_63pg_Set 2 Amp 1_rep-874844	4	51502460	77765.5	0.433908	1.01421	45	32	23	15	38.9891	27.4272	20.4373	13.1464	2.89164	Back Stutter	12.2076	Forward Stutter	7.2865	89	0.13414	0.0816424	0.054854	0.0385016	0.00457134	0.0036746	0.00315741	0.00357122
2.8.0	4-3-2-1_63pg_Set 2 Amp 1_rep-887628	4	52434410	111769	0.402157	1.02163	44	31	23	15	38.7167	27.4476	20.5373	13.2984	3.03209	Back Stutter	11.6908	Forward Stutter	7.75332	89	0.127562	0.0827685	0.0545834	0.0385003	0.0043185	0.00376863	0.00313941	0.0035472
2.8.0	4-3-2-1_63pg_Set 2 Amp 1_rep-952324	4	51814063	88511.8	0.478089	1.00813	44	31	23	15	39.0707	27.4037	20.392	13.1336	3.02538	Back Stutter	12.1368	Forward Stutter	7.23659	89	0.133805	0.0766653	0.0554195	0.0367284	0.00469189	0.00344682	0.00331882	0.0034506
2.8.0	4-3-2-1_63pg_Set 2 Amp 1_rep-960932	4	51894968	69716.5	0.311552	1.01055	44	31	23	15	38.97	27.4399	20.4079	13.1822	3.04823	Back Stutter	11.8606	Forward Stutter	7.50487	89	0.131009	0.0776402	0.0568629	0.0382078	0.00458575	0.00352395	0.00343353	0.00365696
2.8.0	4-3-2-1_63pg_Set 2 Amp 2_rep-35262	4	61370693	74879.1	4.684	1.00768	42	31	24	17	36.7057	27.3405	21.2488	14.705	2.43196	Back Stutter	10.8685	Forward Stutter	7.12893	89	0.129086	0.0836993	0.059163	0.0389397	0.00479041	0.0038486	0.00335121	0.00313004
2.8.0	4-3-2-1_63pg_Set 2 Amp 2_rep-104565	4	62535237	91119.3	4.92473	1.00608	42	31	24	17	36.8463	27.3657	21.1879	14.6001	2.38753	Back Stutter	10.7407	Forward Stutter	7.75254	89	0.128674	0.0821739	0.059249	0.0380954	0.00471662	0.00372779	0.0033597	0.00304659
2.8.0	4-3-2-1_63pg_Set 2 Amp 2_rep-562810	4	60109092	54554.5	4.61205	1.00866	42	31	24	17	36.9225	27.341	21.1451	14.5914	2.44338	Back Stutter	11.3213	Forward Stutter	7.61756	89	0.133118	0.0839578	0.0579756	0.0400425	0.00494072	0.00383227	0.00324941	0.00325162
2.8.0	4-3-2-1_63pg_Set 2 Amp 2_rep-626603	4	61371760	60972.9	4.8056	1.00733	42	31	24	17	36.8834	27.2922	21.1541	14.6703	2.403	Back Stutter	11.0326	Forward Stutter	7.56357	89	0.132049	0.0816189	0.0578562	0.0386815	0.00491138	0.00370325	0.00325051	0.00310253
2.8.0	4-3-2-1_63pg_Set 2 Amp 2_rep-655450	4	63068124	84039.8	4.71036	1.01048	42	31	24	17	36.7139	27.2959	21.2507	14.7395	2.39084	Back Stutter	11.1323	Forward Stutter	6.76361	89	0.127899	0.0820189	0.0599781	0.0398511	0.00471171	0.00374166	0.0034144	0.0032083
2.8.0	4-3-2-1_63pg_Set 2 Amp 2_rep-803747	4	61935814	144536	4.87159	1.01055	42	31	24	17	36.7786	27.3359	21.2219	14.6635	2.3937	Back Stutter	13.6798	Forward Stutter	7.26205	89	0.131523	0.0833365	0.0605566	0.041634	0.00486488	0.00378026	0.00343095	0.0034063
2.8.0	4-3-2-1_63pg_Set 2 Amp 2_rep-874844	4	61445732	118605	4.9091	1.00225	42	32	24	17	36.8245	27.3489	21.2184	14.6082	2.4212	Back Stutter	10.3865	Forward Stutter	7.40436	89	0.130977	0.0831631	0.0603804	0.0402315	0.00480341	0.00375335	0.00341191	0.00326744
2.8.0	4-3-2-1_63pg_Set 2 Amp 2_rep-887628	4	63756087	65611.3	4.73084	1.01159	42	31	24	17	36.7144	27.3074	21.252	14.7262	2.40845	Back Stutter	10.6386	Forward Stutter	8.51683	89	0.128459	0.0805071	0.0576131	0.0382777	0.00474152	0.00362998	0.00321622	0.00303842
2.8.0	4-3-2-1_63pg_Set 2 Amp 2_rep-952324	4	60635436	98134.6	4.73311	1.02258	42	31	24	17	36.846	27.3265	21.1879	14.6395	2.41202	Back Stutter	10.7473	Forward Stutter	7.8143	89	0.13333	0.0845928	0.0593129	0.0402207	0.0049751	0.00387543	0.00334933	0.00326936
2.8.0	4-3-2-1_63pg_Set 2 Amp 2_rep-960932	4	61739100	98091	4.94215	1.01811	42	32	24	17	36.7575	27.3536	21.2411	14.6478	2.41284	Back Stutter	10.5649	Forward Stutter	7.54331	89	0.131395	0.0863075	0.0585154	0.0396275	0.00484865	0.00396972	0.00325696	0.00317424
2.8.0	4-3-2-1_250pg_Set 2 Amp 1_rep-35262	4	165583666	324413	20.6299	1.00713	107	68	52	38	40.4002	25.6261	19.5787	14.395	2.6043	Back Stutter	10.4269	Forward Stutter	7.60638	89	0.340342	0.146457	0.0955106	0.0567081	0.00507768	0.00283704	0.00231057	0.00177305
2.8.0	4-3-2-1_250pg_Set 2 Amp 1_rep-104565	4	164072168	144505	21.3952	1.00526	104	68	52	38	39.5433	25.9437	19.8803	14.6328	2.69223	Back Stutter	10.734	Forward Stutter	7.58805	89	0.314269	0.151056	0.0973939	0.0592924	0.00465889	0.00294708	0.00235019	0.00185169
2.8.0	4-3-2-1_250pg_Set 2 Amp 1_rep-562810	4	171937665	226489	20.5283	1.00902	105	68	52	38	39.9477	25.8048	19.7209	14.5265	2.58215	Back Stutter	11.4123	Forward Stutter	8.33941	89	0.322868	0.156858	0.0900394	0.0605378	0.00474831	0.00309417	0.00212616	0.00190007
2.8.0	4-3-2-1_250pg_Set 2 Amp 1_rep-626603	4	167389433	289322	20.9454	1.00412	107	69	52	38	40.3542	25.7697	19.5908	14.2853	2.6407	Back Stutter	10.4967	Forward Stutter	7.88739	89	0.34011	0.152951	0.090795	0.0606582	0.00502116	0.00295751	0.00214322	0.00192689
2.8.0	4-3-2-1_250pg_Set 2 Amp 1_rep-655450	4	172184071	255953	20.8206	1.01182	107	69	52	39	40.1076	25.7986	19.6474	14.4463	2.66549	Back Stutter	11.5107	Forward Stutter	7.10961	89	0.339948	0.160458	0.0952149	0.0574653	0.00504067	0.00314243	0.0022689	0.00177153
2.8.0	4-3-2-1_250pg_Set 2 Amp 1_rep-803747	4	174622951	256770	21.3174	1.00498	106	68	52	38	40.0049	25.8076	19.7254	14.4621	2.63874	Back Stutter	10.2662	Forward Stutter	7.7197	89	0.325545	0.146126	0.0900353	0.0607965	0.00477722	0.00279994	0.00211845	0.00191505
2.8.0	4-3-2-1_250pg_Set 2 Amp 1_rep-874844	4	162220722	204125	20.3439	1.00392	107	68	52	38	40.3782	25.7743	19.5925	14.255	2.6111	Back Stutter	10.5245	Forward Stutter	7.08453	89	0.33386	0.149355	0.0924884	0.0605868	0.00490985	0.00288709	0.0022128	0.00194452
2.8.0	4-3-2-1_250pg_Set 2 Amp 1_rep-887628	4	166017644	285319	20.6548	1.00665	106	68	52	38	40.2105	25.8143	19.6394	14.3358	2.65122	Back Stutter	10.4589	Forward Stutter	8.22889	89	0.324083	0.152554	0.0925681	0.0589546	0.00476258	0.00298865	0.00222499	0.00188012
2.8.0	4-3-2-1_250pg_Set 2 Amp 1_rep-952324	4	167899205	325054	20.7796	1.0066	109	69	53	39	40.4188	25.6467	19.5908	14.3437	2.62332	Back Stutter	10.8287	Forward Stutter	7.39942	89	0.34729	0.154483	0.0950109	0.0595606	0.00508467	0.00296543	0.00223567	0.00184252
2.8.0	4-3-2-1_250pg_Set 2 Amp 1_rep-960932	4	159920472	256791	24.6857	1.01211	107	69	52	38	40.2579	25.8265	19.6434	14.2721	2.68384	Back Stutter	10.5505	Forward Stutter	7.70831	89	0.335706	0.155846	0.0934362	0.0582678	0.00494316	0.00302772	0.00221639	0.00183536
2.8.0	4-3-2-1_250pg_Set 2 Amp 2_rep-35262	4	167080619	234229	24.055	1.00231	130	86	62	42	40.664	26.9975	19.3289	13.0096	2.68559	Back Stutter	8.71844	Forward Stutter	7.87076	89	0.423271	0.221475	0.122899	0.0683652	0.00527532	0.00360738	0.00254221	0.00200161
2.8.0	4-3-2-1_250pg_Set 2 Amp 2_rep-104565	4	158500775	259510	23.6453	1.00257	130	86	61	41	40.8601	26.9429	19.2461	12.9509	2.79063	Back Stutter	9.89392	Forward Stutter	7.53886	89	0.433988	0.213806	0.125859	0.0717408	0.0054787	0.00344283	0.00263829	0.00213207
2.8.0	4-3-2-1_250pg_Set 2 Amp 2_rep-562810	4	162734510	211278	24.7592	1.00365	130	87	62	41	40.6287	27.0721	19.3767	12.9225	2.68601	Back Stutter	9.61448	Forward Stutter	7.25754	89	0.429305	0.215695	0.127518	0.072822	0.00539518	0.00344269	0.00265759	0.00218102
2.8.0	4-3-2-1_250pg_Set 2 Amp 2_rep-626603	4	164539040	243343	23.6138	1.00604	129	86	62	42	40.4145	27.0589	19.4045	13.122	2.6614	Back Stutter	9.16144	Forward Stutter	7.63198	89	0.41881	0.213005	0.132481	0.0710334	0.00527458	0.00341976	0.00281888	0.00208859
2.8.0	4-3-2-1_250pg_Set 2 Amp 2_rep-655450	4	163587092	168765	26.5787	1.00675	131	86	62	42	40.8189	26.8037	19.2837	13.0937	2.71105	Back Stutter	9.35823	Forward Stutter	7.57992	89	0.427214	0.210661	0.130543	0.0691938	0.00531768	0.00338864	0.00276614	0.00201175
2.8.0	4-3-2-1_250pg_Set 2 Amp 2_rep-803747	4	160926321	188113	25.5381	1.00823	131	86	62	41	40.8867	26.8366	19.3739	12.9028	2.67445	Back Stutter	9.55746	Forward Stutter	8.27315	89	0.43356	0.21559	0.130747	0.0718085	0.00539871	0.003472	0.00273512	0.00214332
2.8.0	4-3-2-1_250pg_Set 2 Amp 2_rep-874844	4	162498811	149585	23.79	1.01011	130	87	62	42	40.5322	27.0756	19.3717	13.0205	2.73214	Back Stutter	9.54111	Forward Stutter	6.41604	89	0.424592	0.22183	0.121624	0.0717014	0.00530364	0.00358155	0.00248651	0.0021085
2.8.0	4-3-2-1_250pg_Set 2 Amp 2_rep-887628	4	157724737	276839	24.6041	1.00275	131	87	61	42	40.8837	26.9892	19.1497	12.9774	2.65278	Back Stutter	8.69062	Forward Stutter	7.20315	89	0.434134	0.216744	0.129145	0.0727217	0.00542975	0.00347699	0.00274094	0.00215369
2.8.0	4-3-2-1_250pg_Set 2 Amp 2_rep-952324	4	158613484	218298	23.5788	1.01227	130	87	62	42	40.5262	27.0465	19.4001	13.0272	2.69757	Back Stutter	8.62679	Forward Stutter	7.25972	89	0.423027	0.224036	0.128947	0.0737348	0.00527179	0.00364016	0.00268146	0.00218782
2.8.0	4-3-2-1_250pg_Set 2 Amp 2_rep-960932	4	164042338	285124	23.9407	1.008	131	87	62	42	40.6955	26.9116	19.3077	13.0853	2.75226	Back Stutter	8.98524	Forward Stutter	8.48959	89	0.433017	0.224044	0.127498	0.0730163	0.00540822	0.0036412	0.00264376	0.00213092
2.8.0	4-3-2-1_500pg_Set 2 Amp 1_rep-35262	4	639390539	165137	44.7655	1.00404	368	234	134	90	44.5778	28.3693	16.1809	10.872	3.35307	Back Stutter	5.76863	Forward Stutter	7.09244	85	1.14456	0.521268	0.325356	0.165152	0.00486265	0.00295034	0.00333853	0.00229405
2.8.0	4-3-2-1_500pg_Set 2 Amp 1_rep-104565	4	464065107	196830	45.5794	1.01634	365	234	131	88	44.6443	28.5816	16.005	10.7691	3.25272	Back Stutter	6.92256	Forward Stutter	7.52545	85	1.1246	0.495835	0.329858	0.155979	0.00477957	0.00275991	0.00351124	0.00218503
2.8.0	4-3-2-1_500pg_Set 2 Amp 1_rep-562810	4	552195300	181281	44.7807	1.01304	365	235	131	88	44.5335	28.7019	15.9728	10.7917	3.2821	Back Stutter	6.03306	Forward Stutter	7.51162	85	1.11944	0.495369	0.31787	0.161844	0.00475716	0.00274123	0.00334278	0.00229159
2.8.0	4-3-2-1_500pg_Set 2 Amp 1_rep-626603	4	528617740	84937.7	45.9394	1.00923	364	236	131	89	44.4172	28.7442	15.9835	10.8551	3.18649	Back Stutter	6.15309	Forward Stutter	7.42071	85	1.11946	0.507539	0.32179	0.168026	0.00477338	0.00282345	0.00338978	0.0023766
2.8.0	4-3-2-1_500pg_Set 2 Amp 1_rep-655450	4	594745654	148009	45.1347	1.00581	364	235	131	89	44.479	28.6598	16.0209	10.8403	3.33953	Back Stutter	6.91381	Forward Stutter	7.63269	85	1.11974	0.520225	0.317159	0.160863	0.0047777	0.00293608	0.0033156	0.00225258
2.8.0	4-3-2-1_500pg_Set 2 Amp 1_rep-803747	4	548718811	152512	45.2721	1.01394	366	236	131	89	44.5468	28.6948	15.9381	10.8203	3.29463	Back Stutter	6.34824	Forward Stutter	7.05147	85	1.14084	0.504506	0.323073	0.164858	0.00487963	0.00279472	0.00340137	0.00231695
2.8.0	4-3-2-1_500pg_Set 2 Amp 1_rep-874844	4	592808209	176391	45.4912	1.02179	362	234	134	91	44.1378	28.5079	16.2634	11.091	3.40347	Back Stutter	6.22313	Forward Stutter	7.78708	85	1.11693	0.518752	0.33222	0.171602	0.00479145	0.00293056	0.00344223	0.00236464
2.8.0	4-3-2-1_500pg_Set 2 Amp 1_rep-887628	4	592001353	134853	46.1447	1.00535	370	235	133	91	44.6218	28.3481	16.0418	10.9883	3.46261	Back Stutter	6.59391	Forward Stutter	6.79455	85	1.15387	0.532053	0.327816	0.164773	0.00489354	0.0030249	0.00340799	0.0022687
2.8.0	4-3-2-1_500pg_Set 2 Amp 1_rep-952324	4	423540054	237486	45.305	1.01989	366	237	132	89	44.437	28.7547	15.9928	10.8155	3.27505	Back Stutter	6.46463	Forward Stutter	6.72775	85	1.13595	0.520937	0.318771	0.173402	0.00484283	0.00290994	0.00333465	0.00247059
2.8.0	4-3-2-1_500pg_Set 2 Amp 1_rep-960932	4	670341175	151959	45.9666	1.01816	365	236	133	90	44.2965	28.6001	16.137	10.9663	3.34121	Back Stutter	5.75273	Forward Stutter	6.34688	85	1.13627	0.525397	0.328929	0.172031	0.00487166	0.00296107	0.00341024	0.00239532
2.8.0	4-3-2-1_500pg_Set 2 Amp 2_rep-35262	4	508061354	144223	45.7873	1.00973	364	200	151	115	43.8852	24.0867	18.1675	13.8606	3.13137	Back Stutter	6.18382	Forward Stutter	6.8345	85	1.16696	0.482061	0.337007	0.195838	0.00513451	0.00332927	0.00297052	0.00208588
2.8.0	4-3-2-1_500pg_Set 2 Amp 2_rep-104565	4	552681895	106276	48.6132	1.01267	370	200	152	116	44.1916	23.8462	18.1466	13.8156	3.20312	Back Stutter	6.51405	Forward Stutter	6.79195	85	1.21193	0.4935	0.340723	0.191876	0.00533829	0.00343392	0.00298362	0.00201381
2.8.0	4-3-2-1_500pg_Set 2 Amp 2_rep-562810	4	656895964	175698	46.277	1.00317	370	199	152	116	44.2343	23.7927	18.1096	13.8634	3.18056	Back Stutter	6.33092	Forward Stutter	7.08519	85	1.20854	0.517344	0.343126	0.191658	0.0052861	0.00367707	0.00301921	0.00200476
2.8.0	4-3-2-1_500pg_Set 2 Amp 2_rep-626603	4	567676456	153455	45.5767	1.01034	364	198	150	115	44.0247	23.9129	18.1696	13.8928	3.23737	Back Stutter	7.22987	Forward Stutter	6.79977	85	1.16576	0.517324	0.324275	0.191877	0.00511717	0.00371036	0.00282649	0.00203522
2.8.0	4-3-2-1_500pg_Set 2 Amp 2_rep-655450	4	544276737	147258	46.2243	1.00509	368	198	151	116	44.12	23.824	18.176	13.88	3.15427	Back Stutter	6.69729	Forward Stutter	7.37368	85	1.17997	0.534018	0.335998	0.198498	0.00513661	0.00387068	0.0029347	0.00210291
2.8.0	4-3-2-1_500pg_Set 2 Amp 2_rep-803747	4	538288823	167020	46.6446	1.00967	365	201	153	116	43.7428	24.0533	18.27	13.9339	3.21436	Back Stutter	6.33064	Forward Stutter	7.57193	85	1.17194	0.523534	0.341479	0.20247	0.00513902	0.00370632	0.00297085	0.00214314
2.8.0	4-3-2-1_500pg_Set 2 Amp 2_rep-874844	4	652338245	201670	46.8931	1.00247	366	200	152	116	43.8883	24.0176	18.1926	13.9015	3.16693	Back Stutter	5.90789	Forward Stutter	6.93654	85	1.16215	0.523566	0.32435	0.196845	0.00504762	0.00371081	0.00279401	0.00207714
2.8.0	4-3-2-1_500pg_Set 2 Amp 2_rep-887628	4	577689004	170277	46.6819	1.02243	362	198	150	115	43.823	24.0428	18.2332	13.901	3.19892	Back Stutter	6.37104	Forward Stutter	7.68394	85	1.14315	0.531358	0.3282	0.189865	0.00500515	0.00384513	0.00286761	0.00201158
2.8.0	4-3-2-1_500pg_Set 2 Amp 2_rep-952324	4	603593441	145193	51.3271	1.01432	368	199	152	115	44.101	23.9032	18.1604	13.8354	3.20826	Back Stutter	6.45613	Forward Stutter	7.02107	85	1.18242	0.544767	0.308684	0.193015	0.00514702	0.00396694	0.00263218	0.0020359
2.8.0	4-3-2-1_500pg_Set 2 Amp 2_rep-960932	4	538647066	169512	48.5238	1.0084	364	200	151	116	43.7897	24.0489	18.2226	13.9387	3.08206	Back Stutter	6.10478	Forward Stutter	6.84139	85	1.14961	0.543853	0.33663	0.189037	0.00500334	0.00395564	0.00295241	0.00197986
2.8.0	4-3-2-1_870pg_Set 2 Amp 1_rep-35262	4	591831397	125397	47.9232	1.01847	447	264	167	110	45.2602	26.7244	16.8808	11.1347	3.83419	Back Stutter	5.83816	Forward Stutter	6.7223	85	1.49816	0.692862	0.322527	0.187284	0.00554435	0.00372475	0.00245067	0.00208181
2.8.0	4-3-2-1_870pg_Set 2 Amp 1_rep-104565	4	595915344	99712.1	49.2795	1.00688	446	263	166	108	45.3414	26.748	16.8962	11.0143	3.77022	Back Stutter	5.91264	Forward Stutter	7.33767	85	1.50937	0.665262	0.3141	0.178493	0.00564546	0.00353656	0.00238624	0.00200245
2.8.0	4-3-2-1_870pg_Set 2 Amp 1_rep-562810	4	611384793	121000	48.6657	1.03124	449	271	168	110	44.9783	27.1691	16.8653	10.9873	3.88546	Back Stutter	5.57594	Forward Stutter	8.21431	85	1.5392	0.748305	0.293993	0.18289	0.00579078	0.0040295	0.00216911	0.00203195
2.8.0	4-3-2-1_870pg_Set 2 Amp 1_rep-626603	4	631551770	84883.7	48.9565	1.0144	450	266	167	109	45.3399	26.8202	16.8408	10.9991	3.79776	Back Stutter	5.9266	Forward Stutter	7.46905	85	1.51812	0.712269	0.29831	0.184639	0.00562732	0.00383809	0.00221416	0.0020737
2.8.0	4-3-2-1_870pg_Set 2 Amp 1_rep-655450	4	596637386	141349	48.3374	1.02745	449	266	167	109	45.3054	26.8141	16.8361	11.0444	3.90122	Back Stutter	6.14701	Forward Stutter	6.92616	85	1.53847	0.688935	0.315545	0.17749	0.005785	0.00366481	0.00237623	0.00196349
2.8.0	4-3-2-1_870pg_Set 2 Amp 1_rep-803747	4	713267797	164077	48.5588	1.00462	452	264	168	110	45.4446	26.5616	16.8882	11.1056	3.90069	Back Stutter	5.84616	Forward Stutter	7.36417	85	1.54986	0.661275	0.317005	0.184088	0.0057942	0.00348699	0.00237767	0.00202756
2.8.0	4-3-2-1_870pg_Set 2 Amp 1_rep-874844	4	512937085	136579	48.5029	1.03852	444	263	168	109	45.1232	26.7638	17.0287	11.0844	3.9249	Back Stutter	5.90531	Forward Stutter	8.05905	85	1.51477	0.677006	0.292035	0.187103	0.0057369	0.00361389	0.00214948	0.0021067
2.8.0	4-3-2-1_870pg_Set 2 Amp 1_rep-887628	4	636155569	66016.2	48.5623	1.00942	451	270	167	110	45.2032	27.0136	16.7577	11.0255	3.84227	Back Stutter	5.69491	Forward Stutter	6.72246	85	1.53413	0.739263	0.31986	0.17964	0.00569721	0.00397681	0.00241482	0.00197832
2.8.0	4-3-2-1_870pg_Set 2 Amp 1_rep-952324	4	754060386	102806	49.0162	1.00824	444	266	167	110	44.9938	26.9465	16.9481	11.1116	3.90696	Back Stutter	5.31768	Forward Stutter	7.70173	85	1.49816	0.693102	0.308959	0.176606	0.00562573	0.00368888	0.0023105	0.00194516
2.8.0	4-3-2-1_870pg_Set 2 Amp 1_rep-960932	4	650261076	114136	48.1342	1.01018	443	262	166	109	45.2486	26.7189	16.9303	11.1022	3.82279	Back Stutter	6.08128	Forward Stutter	7.98459	85	1.50373	0.677866	0.299019	0.183333	0.00567118	0.00364762	0.00223899	0.00205997
2.8.0	4-3-2-1_870pg_Set 2 Amp 2_rep-35262	4	693271799	93135.6	54.4495	1.00665	550	377	255	158	41.0128	28.1607	19.0452	11.7814	4.18621	Back Stutter	6.36034	Forward Stutter	8.32168	85	1.68375	0.893457	0.592357	0.262616	0.00481448	0.00330314	0.00316539	0.00202405
2.8.0	4-3-2-1_870pg_Set 2 Amp 2_rep-104565	4	565630213	169403	53.8229	1.02256	563	380	259	161	41.2847	27.9124	19.0062	11.7966	4.12091	Back Stutter	6.23081	Forward Stutter	8.46371	85	1.81393	0.943703	0.564016	0.257798	0.00524068	0.00350476	0.00296601	0.00195747
2.8.0	4-3-2-1_870pg_Set 2 Amp 2_rep-562810	4	782433939	89464.9	52.6318	1.03252	552	377	256	159	41.0794	28.0272	19.0331	11.8603	4.57182	Back Stutter	6.51058	Forward Stutter	8.27756	85	1.73873	0.929767	0.577371	0.271813	0.00497494	0.00344338	0.00301905	0.00208567
2.8.0	4-3-2-1_870pg_Set 2 Amp 2_rep-626603	4	580884952	78312.5	52.3422	1.00604	555	378	260	161	40.9726	27.9201	19.235	11.8723	4.57325	Back Stutter	6.43041	Forward Stutter	8.41108	85	1.73083	0.968518	0.585639	0.280067	0.00492362	0.00366941	0.00307338	0.00214755
2.8.0	4-3-2-1_870pg_Set 2 Amp 2_rep-655450	4	543582854	111015	52.9784	1.01892	557	377	257	160	41.2031	27.9345	18.988	11.8745	4.58281	Back Stutter	5.99883	Forward Stutter	8.05698	85	1.77283	0.852034	0.560986	0.276952	0.00509098	0.00314092	0.0029571	0.00212073
2.8.0	4-3-2-1_870pg_Set 2 Amp 2_rep-803747	4	698354364	114290	53.8573	1.02825	570	382	252	158	41.8197	28.0599	18.4985	11.6219	4.18196	Back Stutter	6.07665	Forward Stutter	8.45128	85	1.90997	0.757374	0.612768	0.250646	0.00556807	0.00255738	0.00333814	0.00190499
2.8.0	4-3-2-1_870pg_Set 2 Amp 2_rep-874844	4	693466648	110710	52.9739	1.01504	561	376	253	159	41.622	27.8698	18.7414	11.7667	4.62331	Back Stutter	6.38737	Forward Stutter	7.38551	85	1.84173	0.801976	0.604971	0.267594	0.00535799	0.00280502	0.00327297	0.00205872
2.8.0	4-3-2-1_870pg_Set 2 Amp 2_rep-887628	4	795331181	66734.3	52.6241	1.0277	560	378	257	161	41.2552	27.9041	18.9689	11.8718	4.69878	Back Stutter	5.91596	Forward Stutter	7.87542	85	1.7713	0.916043	0.602545	0.277384	0.00504022	0.00334237	0.00319259	0.00211087
2.8.0	4-3-2-1_870pg_Set 2 Amp 2_rep-952324	4	605991264	115465	54.1799	1.02313	576	382	254	159	42.0485	27.8517	18.5294	11.5704	4.33577	Back Stutter	6.32924	Forward Stutter	7.18072	85	1.95993	0.762025	0.608493	0.259689	0.00571402	0.00257593	0.00326919	0.00198659
2.8.0	4-3-2-1_870pg_Set 2 Amp 2_rep-960932	4	654217285	133527	54.1124	1.02843	562	377	255	159	41.5464	27.8536	18.853	11.7471	4.38272	Back Stutter	6.44983	Forward Stutter	8.144	85	1.84767	0.831742	0.577024	0.273046	0.00539268	0.00295928	0.00306001	0.00211075
2.8.0	10-5-2-1_1.4ng_Set 1 Amp 1_rep-1839	4	549289658	109036	48.2047	1.01343	528	392	186	84	44.4177	32.9086	15.6033	7.0704	4.4363	Back Stutter	5.56209	Forward Stutter	7.2481	85	1.1272	0.686019	0.569801	0.2031	0.00292186	0.0023158	0.00480174	0.00329698
2.8.0	10-5-2-1_1.4ng_Set 1 Amp 1_rep-54505	4	714422629	130277	48.6994	1.01387	540	394	184	84	44.9047	32.8301	15.3015	6.96374	4.72229	Back Stutter	5.57133	Forward Stutter	7.18313	85	1.25935	0.683847	0.576267	0.198411	0.00321817	0.002187	0.00493734	0.00321728
2.8.0	10-5-2-1_1.4ng_Set 1 Amp 1_rep-88110	4	623822733	102113	48.3878	1.01759	532	389	181	85	44.8163	32.7692	15.2655	7.14901	4.9502	Back Stutter	5.62291	Forward Stutter	6.91517	85	1.05957	0.747653	0.56265	0.199613	0.00261934	0.00248541	0.00485433	0.0031744
2.8.0	10-5-2-1_1.4ng_Set 1 Amp 1_rep-337491	4	567986566	132437	48.2695	1.00871	535	392	183	84	44.8051	32.8362	15.3051	7.05365	4.62237	Back Stutter	5.50904	Forward Stutter	6.69369	85	1.2016	0.650078	0.577956	0.19482	0.00314032	0.00213357	0.00502335	0.00311449
2.8.0	10-5-2-1_1.4ng_Set 1 Amp 1_rep-630900	4	652305416	96642.7	48.4482	1.01043	536	394	182	84	44.8375	32.9496	15.2098	7.00315	4.5628	Back Stutter	5.48936	Forward Stutter	6.81494	85	1.20943	0.638881	0.566309	0.194766	0.00312174	0.0020594	0.00488131	0.00313389
2.8.0	10-5-2-1_1.4ng_Set 1 Amp 1_rep-738853	4	512295516	89129.6	48.7165	1.0146	543	397	182	83	45.0566	32.9525	15.1019	6.88898	4.71034	Back Stutter	5.55269	Forward Stutter	6.54997	85	1.42629	0.525821	0.571582	0.186209	0.00378122	0.00158237	0.00495147	0.00297951
2.8.0	10-5-2-1_1.4ng_Set 1 Amp 1_rep-754321	4	622778689	143580	48.2959	1.0169	547	398	186	85	44.953	32.7613	15.2782	7.00746	4.43061	Back Stutter	5.61932	Forward Stutter	6.59775	85	1.47491	0.531139	0.590676	0.204905	0.00392552	0.00158672	0.00506188	0.00328382
2.8.0	10-5-2-1_1.4ng_Set 1 Amp 1_rep-788248	4	546860885	86127.5	48.5588	1.01681	529	389	186	85	44.5131	32.6848	15.671	7.13107	4.60993	Back Stutter	5.40272	Forward Stutter	6.81109	85	1.05068	0.748827	0.556192	0.202322	0.00269709	0.00263864	0.00467605	0.0032447
2.8.0	10-5-2-1_1.4ng_Set 1 Amp 1_rep-856103	4	603558958	146162	48.0381	1.02719	538	394	187	84	44.7137	32.758	15.5207	7.00757	4.46393	Back Stutter	5.53957	Forward Stutter	7.1519	85	1.23956	0.621688	0.573851	0.197813	0.00320767	0.00201247	0.00480117	0.00316522
2.8.0	10-5-2-1_1.4ng_Set 1 Amp 1_rep-934605	4	560975264	140834	48.0769	1.01634	544	396	192	87	44.5884	32.504	15.76	7.14763	4.78164	Back Stutter	5.74687	Forward Stutter	6.13991	85	1.34762	0.640775	0.588258	0.213494	0.00355261	0.00217036	0.00488659	0.00336975
2.8.0	10-5-2-1_1.4ng_Set 1 Amp 2_rep-1839	4	532512672	147583	54.2788	1.00297	791	492	257	74	49.0421	30.4642	15.917	4.57678	4.38387	Back Stutter	4.30772	Forward Stutter	6.39934	85	1.95239	0.476419	0.912269	0.110385	0.0033998	0.00107728	0.00619453	0.00177464
2.8.0	10-5-2-1_1.4ng_Set 1 Amp 2_rep-54505	4	581439272	151731	54.9644	1.01242	791	494	260	75	48.807	30.5139	16.0463	4.63281	4.41918	Back Stutter	4.43986	Forward Stutter	6.44487	85	1.93959	0.476318	0.92676	0.112961	0.00337304	0.0010706	0.00623492	0.00179121
2.8.0	10-5-2-1_1.4ng_Set 1 Amp 2_rep-88110	4	612055844	184673	54.8497	1.00618	805	493	259	75	49.2774	30.2237	15.8752	4.62367	4.44146	Back Stutter	4.47687	Forward Stutter	6.7894	85	2.04179	0.482767	0.928192	0.119523	0.00354014	0.00108866	0.00629334	0.0019045
2.8.0	10-5-2-1_1.4ng_Set 1 Amp 2_rep-337491	4	591203719	158261	54.5891	1.00476	802	491	251	74	49.5783	30.333	15.5398	4.5489	4.42996	Back Stutter	4.28232	Forward Stutter	6.28426	85	2.01121	0.459312	0.882064	0.107926	0.00348406	0.00103721	0.00605079	0.00173722
2.8.0	10-5-2-1_1.4ng_Set 1 Amp 2_rep-630900	4	429614426	176388	53.691	1.00534	795	490	256	74	49.2149	30.3584	15.8569	4.56977	4.42128	Back Stutter	4.55529	Forward Stutter	6.99574	85	1.98249	0.477331	0.91126	0.111814	0.00345559	0.00108326	0.00621812	0.00180448
2.8.0	10-5-2-1_1.4ng_Set 1 Amp 2_rep-738853	4	467323753	123559	57.9011	1.00349	786	492	258	74	48.8068	30.5531	16.0483	4.59173	4.3961	Back Stutter	4.19542	Forward Stutter	7.32909	85	1.92018	0.480156	0.919793	0.110206	0.00335083	0.00108564	0.00622046	0.00176852
2.8.0	10-5-2-1_1.4ng_Set 1 Amp 2_rep-754321	4	512087724	139985	54.2778	1.0181	797	484	268	74	49.0807	29.8443	16.4929	4.582	4.47749	Back Stutter	4.53224	Forward Stutter	6.39797	85	2.00095	0.647783	0.785461	0.114043	0.00348354	0.00207604	0.00533255	0.00182789
2.8.0	10-5-2-1_1.4ng_Set 1 Amp 2_rep-788248	4	501327593	192025	54.7223	1.00862	792	488	254	74	49.2653	30.3435	15.8139	4.57728	4.3772	Back Stutter	4.39813	Forward Stutter	6.24749	85	1.97313	0.467464	0.900458	0.110928	0.00344625	0.00106437	0.00616598	0.00179502
2.8.0	10-5-2-1_1.4ng_Set 1 Amp 2_rep-856103	4	621943882	82161.8	55.4123	1.01761	786	490	279	75	48.2089	30.0628	17.1147	4.61364	4.49048	Back Stutter	4.37204	Forward Stutter	7.47637	85	1.92684	0.662678	0.839293	0.115225	0.00336054	0.00208979	0.00555101	0.00182599
2.8.0	10-5-2-1_1.4ng_Set 1 Amp 2_rep-934605	4	478570346	152511	53.6566	1.06664	768	492	276	76	47.67	30.5257	17.0964	4.7079	4.52901	Back Stutter	4.47011	Forward Stutter	7.0596	85	2.05597	0.497408	0.816893	0.122063	0.00423639	0.0011301	0.00545338	0.00192156
2.8.0	10-5-2-1_1.6ng_Set 1 Amp 1_rep-1839	4	1844268484	125801	60.3063	1.01669	982	571	135	76	55.7103	32.3742	7.62953	4.28604	3.49176	Back Stutter	5.07126	Forward Stutter	6.69786	81	2.05213	1.33763	0.258625	0.0740342	0.00271345	0.00317145	0.00240856	0.00108958
2.8.0	10-5-2-1_1.6ng_Set 1 Amp 1_rep-54505	4	1255582755	175596	60.0662	1.24305	972	579	145	79	54.7976	32.6068	8.15808	4.4375	4.03049	Back Stutter	5.39514	Forward Stutter	6.58572	81	2.26391	1.18185	0.308312	0.086712	0.00324707	0.00273002	0.00269953	0.0012353
2.8.0	10-5-2-1_1.6ng_Set 1 Amp 1_rep-88110	4	1743648228	116289	60.6421	1.00648	991	570	131	75	56.0639	32.2653	7.42649	4.24428	3.32942	Back Stutter	5.03353	Forward Stutter	7.03531	81	2.06854	1.35701	0.240646	0.0730089	0.00270258	0.0032324	0.00228328	0.00108279
2.8.0	10-5-2-1_1.6ng_Set 1 Amp 1_rep-337491	4	1735928158	107714	60.7869	1.33009	968	570	139	77	55.2225	32.4969	7.91536	4.36529	3.90124	Back Stutter	5.21019	Forward Stutter	7.31167	81	2.12068	1.22929	0.279017	0.0816885	0.00296612	0.00290402	0.0024987	0.00119092
2.8.0	10-5-2-1_1.6ng_Set 1 Amp 1_rep-630900	4	1849151677	135338	59.8985	1.28597	983	580	145	77	55.1201	32.4753	8.08395	4.32058	3.87358	Back Stutter	5.14582	Forward Stutter	7.36694	81	2.20177	1.26653	0.311951	0.0831304	0.00308628	0.00297679	0.00273739	0.00120221
2.8.0	10-5-2-1_1.6ng_Set 1 Amp 1_rep-738853	4	2079254430	137701	60.2316	1.00251	986	572	132	75	55.8472	32.3994	7.4916	4.26181	3.40618	Back Stutter	5.17532	Forward Stutter	7.23377	81	2.00014	1.3805	0.248917	0.0738489	0.00260273	0.00329661	0.00236045	0.00109315
2.8.0	10-5-2-1_1.6ng_Set 1 Amp 1_rep-754321	4	1935292486	115884	59.5338	1.30826	971	572	141	76	55.1771	32.513	7.97251	4.33746	3.80688	Back Stutter	5.15478	Forward Stutter	6.45195	81	2.10698	1.22645	0.289079	0.0796229	0.00294798	0.00290311	0.00256606	0.00115708
2.8.0	10-5-2-1_1.6ng_Set 1 Amp 1_rep-788248	4	1569945588	92954.4	59.5296	1.01193	982	571	135	75	55.6684	32.4075	7.6531	4.27105	3.53106	Back Stutter	4.98624	Forward Stutter	7.02465	81	2.10199	1.32022	0.259808	0.0745205	0.00280642	0.00311387	0.00242699	0.00110141
2.8.0	10-5-2-1_1.6ng_Set 1 Amp 1_rep-856103	4	1450244290	114546	60.9465	1.27125	981	583	146	78	54.9386	32.601	8.1187	4.34165	3.87205	Back Stutter	5.25266	Forward Stutter	6.50661	81	2.2742	1.24784	0.315773	0.0872836	0.00321356	0.00291332	0.00275632	0.00125756
2.8.0	10-5-2-1_1.6ng_Set 1 Amp 1_rep-934605	4	2012520537	188179	60.0112	1.01764	982	571	135	76	55.6873	32.3555	7.67265	4.28456	3.5513	Back Stutter	5.05548	Forward Stutter	6.64699	81	2.04135	1.37292	0.262724	0.0745743	0.00269023	0.00328198	0.00245608	0.00109902
2.8.0	10-5-2-1_1.6ng_Set 1 Amp 2_rep-1839	4	665482386	106024	54.8803	1.01882	1090	629	261	129	51.6772	29.837	12.3815	6.10428	5.89014	Back Stutter	9.98472	Forward Stutter	6.87573	81	1.85236	0.876126	0.874134	0.314058	0.00207671	0.00163109	0.00553209	0.00334386
2.8.0	10-5-2-1_1.6ng_Set 1 Amp 2_rep-54505	4	642172677	135323	57.5728	1.02073	1081	624	259	128	51.6574	29.815	12.3934	6.13423	6.08062	Back Stutter	9.8428	Forward Stutter	6.2378	81	1.80193	0.842962	0.860979	0.322476	0.00202777	0.00157526	0.00544911	0.00349057
2.8.0	10-5-2-1_1.6ng_Set 1 Amp 2_rep-88110	4	586747044	147545	54.8949	1.00653	1088	620	265	131	51.7236	29.4672	12.5914	6.2177	5.64728	Back Stutter	10.0698	Forward Stutter	5.78686	81	1.81389	0.857097	0.897649	0.320333	0.00202757	0.00161783	0.00566131	0.00336752
2.8.0	10-5-2-1_1.6ng_Set 1 Amp 2_rep-337491	4	670378954	119224	55.5993	1.00447	1081	613	293	134	50.9892	28.9627	13.729	6.31905	5.64869	Back Stutter	9.96325	Forward Stutter	5.88316	81	1.77662	1.03264	0.826543	0.338478	0.00199324	0.00250251	0.00502887	0.00349146
2.8.0	10-5-2-1_1.6ng_Set 1 Amp 2_rep-630900	4	569314549	110699	57.1371	1.00308	1083	628	267	130	51.3592	29.799	12.663	6.17884	6.08518	Back Stutter	9.82867	Forward Stutter	5.26429	81	1.82065	0.853754	0.911065	0.318078	0.00204911	0.00158596	0.00573512	0.00335042
2.8.0	10-5-2-1_1.6ng_Set 1 Amp 2_rep-738853	4	633269408	197838	55.4764	1.00985	1089	627	266	131	51.5489	29.6606	12.5997	6.1908	5.84667	Back Stutter	9.83273	Forward Stutter	5.96255	81	1.84273	0.87083	0.907317	0.32097	0.00206513	0.00162811	0.00572326	0.00337423
2.8.0	10-5-2-1_1.6ng_Set 1 Amp 2_rep-754321	4	642543160	159075	53.5075	1.02293	1088	629	262	129	51.6207	29.83	12.4243	6.12498	5.90039	Back Stutter	9.80542	Forward Stutter	6.70103	81	1.84633	0.885691	0.886429	0.312764	0.00207264	0.0016543	0.00564519	0.00331163
2.8.0	10-5-2-1_1.6ng_Set 1 Amp 2_rep-788248	4	580994220	163582	52.6764	1.02006	1083	619	289	134	51.0224	29.1777	13.5078	6.29203	5.83761	Back Stutter	9.89723	Forward Stutter	5.83452	81	1.79235	1.05075	0.803692	0.332703	0.00201117	0.00252895	0.0049473	0.00342113
2.8.0	10-5-2-1_1.6ng_Set 1 Amp 2_rep-856103	4	808931861	119314	55.9881	1.00792	1088	628	260	129	51.6856	29.8308	12.3582	6.12542	5.94238	Back Stutter	9.84955	Forward Stutter	6.62724	81	1.83089	0.866791	0.863209	0.32223	0.00205128	0.00161594	0.00545471	0.00346776
2.8.0	10-5-2-1_1.6ng_Set 1 Amp 2_rep-934605	4	595407187	119847	53.9339	1.01357	1096	626	264	130	51.8207	29.5722	12.4579	6.14911	5.56188	Back Stutter	9.82505	Forward Stutter	6.32916	81	1.84388	0.88374	0.884837	0.319616	0.00204988	0.00165958	0.00556426	0.00338398
2.8.0	10-5-2-1_1.8ng_Set 1 Amp 1_rep-1839	4	898646625	127423	58.2019	1.0139	900	645	311	126	45.4034	32.534	15.709	6.35364	5.92041	Back Stutter	7.42354	Forward Stutter	5.752	85	1.31385	0.963883	1.15813	0.346696	0.00173071	0.00178094	0.00681225	0.00399666
2.8.0	10-5-2-1_1.8ng_Set 1 Amp 1_rep-54505	4	793200841	216446	55.8531	1.02084	895	640	308	123	45.4974	32.5565	15.6744	6.27175	6.15124	Back Stutter	7.08125	Forward Stutter	6.20394	85	1.24375	0.947474	1.14506	0.328253	0.00163618	0.00175893	0.0067965	0.00380137
2.8.0	10-5-2-1_1.8ng_Set 1 Amp 1_rep-88110	4	927803655	114900	56.968	1.03507	900	640	307	125	45.6361	32.4423	15.5595	6.36207	6.02752	Back Stutter	7.02949	Forward Stutter	6.65659	85	1.26834	0.956997	1.14	0.342203	0.00165956	0.00177899	0.00678975	0.00394266
2.8.0	10-5-2-1_1.8ng_Set 1 Amp 1_rep-337491	4	876359815	75258.2	58.5135	1.0229	904	643	308	124	45.6684	32.4927	15.567	6.27184	6.22152	Back Stutter	7.05684	Forward Stutter	6.08729	85	1.30335	0.963695	1.14371	0.333636	0.00170405	0.0017833	0.00678766	0.0038578
2.8.0	10-5-2-1_1.8ng_Set 1 Amp 1_rep-630900	4	661087434	118046	56.3727	1.01633	900	648	309	124	45.4369	32.6937	15.588	6.28148	6.2909	Back Stutter	7.1082	Forward Stutter	6.62841	85	1.30042	0.989622	1.1484	0.334191	0.00170683	0.00182371	0.00680757	0.00385092
2.8.0	10-5-2-1_1.8ng_Set 1 Amp 1_rep-738853	4	725583873	105442	56.1944	1.0088	891	633	306	122	45.6308	32.4208	15.6812	6.26715	5.98124	Back Stutter	7.1981	Forward Stutter	6.66432	85	1.14495	0.942966	1.13459	0.322261	0.00148909	0.00177061	0.00675949	0.00374234
2.8.0	10-5-2-1_1.8ng_Set 1 Amp 1_rep-754321	4	788498925	95745.9	56.0674	1.02873	904	637	307	124	45.83	32.3036	15.5805	6.28589	5.91455	Back Stutter	7.14427	Forward Stutter	5.7375	85	1.24635	0.952814	1.13473	0.332105	0.00161621	0.00177953	0.00671216	0.0038352
2.8.0	10-5-2-1_1.8ng_Set 1 Amp 1_rep-788248	4	685036911	229625	56.2464	1.05554	904	635	307	124	45.8856	32.2293	15.595	6.29001	5.97436	Back Stutter	7.03955	Forward Stutter	6.64727	85	1.20895	0.967841	1.13509	0.333684	0.00155942	0.00181938	0.00671012	0.00386856
2.8.0	10-5-2-1_1.8ng_Set 1 Amp 1_rep-856103	4	849925586	127656	56.5422	1.00469	894	644	308	125	45.3763	32.6737	15.6264	6.32365	6.07278	Back Stutter	7.2112	Forward Stutter	5.791	85	1.28374	0.950679	1.14445	0.33707	0.00169549	0.00175153	0.00679478	0.00389349
2.8.0	10-5-2-1_1.8ng_Set 1 Amp 1_rep-934605	4	725861191	168486	59.722	1.00943	902	644	309	124	45.5845	32.5431	15.628	6.24433	6.18873	Back Stutter	6.99304	Forward Stutter	6.94078	85	1.29229	0.966564	1.15303	0.331558	0.00169291	0.00178754	0.00684802	0.00384666
2.8.0	10-5-2-1_1.8ng_Set 1 Amp 2_rep-1839	4	850539018	123591	57.2699	1.04645	1224	917	357	118	46.7941	35.0435	13.6425	4.51987	7.17931	Back Stutter	6.3558	Forward Stutter	6.184	81	2.66266	0.984385	1.05232	0.230505	0.00286032	0.00121274	0.00445538	0.00248323
2.8.0	10-5-2-1_1.8ng_Set 1 Amp 2_rep-54505	4	965321215	131405	56.8484	1.01883	1217	916	367	119	46.4591	34.9813	14.0083	4.55131	7.21831	Back Stutter	6.41102	Forward Stutter	5.84124	81	2.5758	1.01457	1.10905	0.227678	0.00275597	0.0012531	0.00463601	0.00240473
2.8.0	10-5-2-1_1.8ng_Set 1 Amp 2_rep-88110	4	698784434	99667.7	58.1969	1.01327	1197	910	373	120	46.0382	35.0037	14.3484	4.60975	6.87136	Back Stutter	6.29988	Forward Stutter	7.39951	81	2.46884	0.992841	1.14528	0.223144	0.00266843	0.00123944	0.00476323	0.00233615
2.8.0	10-5-2-1_1.8ng_Set 1 Amp 2_rep-337491	4	1093539449	103871	55.9917	1.02302	1225	917	360	119	46.7312	34.9904	13.7359	4.54243	7.2157	Back Stutter	6.33609	Forward Stutter	6.35657	81	2.66017	0.968363	1.06864	0.235495	0.00285251	0.00118776	0.00450216	0.00252151
2.8.0	10-5-2-1_1.8ng_Set 1 Amp 2_rep-630900	4	783548845	83848.1	62.1492	1.02634	1197	909	366	120	46.1462	35.0754	14.1283	4.65008	6.83511	Back Stutter	6.57772	Forward Stutter	6.07979	81	2.39456	1.03164	1.10777	0.223664	0.00256659	0.00129305	0.0046458	0.00231972
2.8.0	10-5-2-1_1.8ng_Set 1 Amp 2_rep-738853	4	680041963	97336.1	60.2955	1.03014	1216	915	370	121	46.3721	34.9012	14.1258	4.60088	7.11959	Back Stutter	6.18282	Forward Stutter	7.45939	81	2.61729	0.974942	1.13123	0.229066	0.00282863	0.00120568	0.00471936	0.00239862
2.8.0	10-5-2-1_1.8ng_Set 1 Amp 2_rep-754321	4	921517662	75743.6	58.7312	1.01578	1218	919	366	118	46.4449	35.0517	13.9848	4.51867	7.08285	Back Stutter	6.40116	Forward Stutter	5.1397	81	2.61373	0.998903	1.10356	0.227194	0.00280892	0.001228	0.00460685	0.00242458
2.8.0	10-5-2-1_1.8ng_Set 1 Amp 2_rep-788248	4	837717476	116414	56.7564	1.02178	1213	915	364	118	46.4701	35.0803	13.9294	4.52021	7.24092	Back Stutter	6.22521	Forward Stutter	6.40611	81	2.63257	0.942789	1.09216	0.22994	0.00284889	0.00115614	0.00458761	0.0024745
2.8.0	10-5-2-1_1.8ng_Set 1 Amp 2_rep-856103	4	852379269	218703	58.9047	1.02161	1226	918	369	121	46.5549	34.8415	14.0219	4.58174	6.98048	Back Stutter	6.31874	Forward Stutter	6.02075	81	2.74229	0.924521	1.12721	0.227559	0.00297555	0.00113226	0.00471564	0.00237178
2.8.0	10-5-2-1_1.8ng_Set 1 Amp 2_rep-934605	4	801300129	126876	57.1228	1.02933	1215	913	363	120	46.5189	34.9686	13.9084	4.604	7.0973	Back Stutter	6.38874	Forward Stutter	5.91068	81	2.57308	0.997321	1.09581	0.224977	0.00275523	0.00123295	0.00461839	0.00234611
2.8.0	10-5-2-1_3.6ng_Set 1 Amp 1_rep-1839	4	2507013259	64570.4	88.1737	1.02734	2314	1406	604	366	49.3438	29.9873	12.8709	7.79792	5.06448	Back Stutter	11.1391	Forward Stutter	6.55531	81	2.92132	2.0171	1.49585	0.795349	0.00145514	0.00169032	0.00342397	0.00285817
2.8.0	10-5-2-1_3.6ng_Set 1 Amp 1_rep-54505	4	2449356504	72462.7	88.2008	1.01482	2319	1410	616	367	49.2217	29.9191	13.0739	7.78528	5.24329	Back Stutter	11.0433	Forward Stutter	5.96889	81	3.02513	2.06568	1.58796	0.810058	0.00151214	0.00173491	0.00362583	0.00291939
2.8.0	10-5-2-1_3.6ng_Set 1 Amp 1_rep-88110	4	2633307732	73499	90.0957	1.01114	2331	1416	607	371	49.3463	29.969	12.8405	7.84428	5.03611	Back Stutter	11.5123	Forward Stutter	5.81344	81	3.05919	2.07643	1.53632	0.803367	0.00152244	0.00173597	0.00353776	0.00285257
2.8.0	10-5-2-1_3.6ng_Set 1 Amp 1_rep-337491	4	2612911200	63801.2	86.4658	1.03127	2319	1410	619	369	49.1618	29.8926	13.1219	7.8237	5.15939	Back Stutter	11.1445	Forward Stutter	6.07808	81	2.94871	2.04204	1.64414	0.775642	0.00146678	0.00170953	0.00379107	0.00273057
2.8.0	10-5-2-1_3.6ng_Set 1 Amp 1_rep-630900	4	3093127791	53111.7	86.8015	1.1028	2246	1447	712	379	47.0765	30.2313	14.7749	7.91728	5.76364	Back Stutter	11.1362	Forward Stutter	5.80292	81	2.90873	2.49941	1.66773	0.857467	0.00150727	0.00246651	0.00356639	0.00301419
2.8.0	10-5-2-1_3.6ng_Set 1 Amp 1_rep-738853	4	3654437342	113264	86.4138	1.24563	2300	1469	662	383	47.8691	30.4707	13.7106	7.94963	5.59383	Back Stutter	11.3177	Forward Stutter	6.17029	81	3.45711	1.97114	1.89562	0.819738	0.00185	0.00160204	0.00422014	0.00277953
2.8.0	10-5-2-1_3.6ng_Set 1 Amp 1_rep-754321	4	2403652587	114460	86.1361	1.27791	2300	1462	651	379	48.1232	30.4611	13.5249	7.89083	5.75977	Back Stutter	11.1777	Forward Stutter	6.13148	81	3.30716	1.95107	1.78472	0.850422	0.00176404	0.00159481	0.00394475	0.00296317
2.8.0	10-5-2-1_3.6ng_Set 1 Amp 1_rep-788248	4	2915911379	52263.9	87.6514	1.00682	2326	1415	617	366	49.2407	29.9507	13.0669	7.74167	5.27434	Back Stutter	10.9881	Forward Stutter	5.96281	81	3.00248	2.06218	1.59426	0.791004	0.00149324	0.00172329	0.00364061	0.00283651
2.8.0	10-5-2-1_3.6ng_Set 1 Amp 1_rep-856103	4	3033569762	80114.2	86.2126	1.00821	2320	1406	610	366	49.3456	29.9013	12.9756	7.77757	5.11252	Back Stutter	11.2066	Forward Stutter	6.14215	81	2.96554	2.01023	1.56212	0.765462	0.00147586	0.00168392	0.00359449	0.00272042
2.8.0	10-5-2-1_3.6ng_Set 1 Amp 1_rep-934605	4	2462906499	108269	86.9246	1.05265	2284	1435	687	377	47.8709	30.0041	14.2538	7.87121	5.31908	Back Stutter	10.9949	Forward Stutter	6.46781	81	2.85759	2.64906	1.49907	0.870489	0.00143372	0.00262768	0.0032183	0.00310016
2.8.0	10-5-2-1_3.6ng_Set 1 Amp 2_rep-1839	4	736747629	176859	74.293	1.02132	1798	1322	699	436	42.2451	31.0707	16.4362	10.248	6.03853	Back Stutter	9.78947	Forward Stutter	8.13176	81	4.0066	1.40496	2.73809	1.44695	0.00298099	0.00121141	0.00763932	0.00544687
2.8.0	10-5-2-1_3.6ng_Set 1 Amp 2_rep-54505	4	689320485	126586	72.5632	1.01859	1787	1311	703	437	42.1687	30.9362	16.59	10.3051	5.85424	Back Stutter	9.57891	Forward Stutter	7.40723	81	3.96116	1.44909	2.76878	1.46105	0.00296343	0.00126532	0.00774814	0.00552768
2.8.0	10-5-2-1_3.6ng_Set 1 Amp 2_rep-88110	4	621139152	98700.3	72.9761	1.01403	1757	1290	692	423	42.2067	30.9915	16.6308	10.171	5.67624	Back Stutter	9.72259	Forward Stutter	8.59632	81	3.55129	1.58246	2.72004	1.37667	0.0026205	0.00142339	0.00771103	0.00525194
2.8.0	10-5-2-1_3.6ng_Set 1 Amp 2_rep-337491	4	660359040	166645	72.8746	1.0131	1756	1298	695	426	42.0535	31.0894	16.6529	10.2042	5.70631	Back Stutter	9.67483	Forward Stutter	7.63748	81	3.54808	1.60147	2.7275	1.39764	0.00260853	0.00142675	0.00767157	0.00533434
2.8.0	10-5-2-1_3.6ng_Set 1 Amp 2_rep-630900	4	598833113	142889	73.6977	1.01564	1725	1292	694	421	41.7338	31.2779	16.7939	10.1944	5.67824	Back Stutter	9.83246	Forward Stutter	7.77758	81	2.98	1.71991	2.71793	1.35241	0.0021516	0.0015746	0.00764346	0.00513121
2.8.0	10-5-2-1_3.6ng_Set 1 Amp 2_rep-738853	4	533885769	129997	73.0217	1.01863	1758	1303	698	429	41.9689	31.1142	16.6753	10.2417	5.76884	Back Stutter	9.68185	Forward Stutter	7.53872	81	3.50551	1.62069	2.74639	1.40965	0.00257444	0.00144808	0.00772174	0.00535208
2.8.0	10-5-2-1_3.6ng_Set 1 Amp 2_rep-754321	4	854759982	126759	73.0716	1.01221	1743	1290	690	421	42.0476	31.1429	16.6603	10.1492	5.78388	Back Stutter	9.61166	Forward Stutter	7.79487	81	3.34712	1.56997	2.70285	1.35315	0.00245239	0.00141014	0.00763778	0.00515575
2.8.0	10-5-2-1_3.6ng_Set 1 Amp 2_rep-788248	4	654432019	92727.4	73.6209	1.01504	1763	1298	692	425	42.1868	31.0689	16.5788	10.1654	5.79359	Back Stutter	9.8292	Forward Stutter	7.77985	81	3.57318	1.5061	2.71304	1.37845	0.0026377	0.001342	0.00765167	0.00523443
2.8.0	10-5-2-1_3.6ng_Set 1 Amp 2_rep-856103	4	694401510	88962.2	76.164	1.01987	1734	1296	689	423	41.8575	31.2897	16.6485	10.2043	5.75507	Back Stutter	9.88479	Forward Stutter	7.92595	81	3.0834	1.69656	2.68935	1.36424	0.00223292	0.00154093	0.00757975	0.00518278
2.8.0	10-5-2-1_3.6ng_Set 1 Amp 2_rep-934605	4	580805767	116823	72.7183	1.01867	1754	1294	691	425	42.1058	31.0859	16.5973	10.211	5.82104	Back Stutter	9.73258	Forward Stutter	7.33889	81	3.38703	1.54859	2.69619	1.38584	0.00248954	0.00140074	0.00758039	0.00527257
2.8.0	10-5-2-1_113pg_Set 1 Amp 1_rep-1839	4	54663301	90971.3	0.743946	1.01519	40	30	22	14	37.5193	28.082	21.1091	13.2896	2.85083	Back Stutter	11.1301	Forward Stutter	7.55904	85	0.10135	0.0650903	0.0508474	0.0353739	0.0036032	0.0028966	0.00305303	0.0035239
2.8.0	10-5-2-1_113pg_Set 1 Amp 1_rep-54505	4	56897463	47419	0.469184	1.01005	40	30	23	15	37.2313	27.9637	21.2012	13.6038	2.78753	Back Stutter	11.2587	Forward Stutter	7.86185	85	0.100279	0.0677736	0.0522905	0.0336725	0.00353422	0.00303574	0.00311082	0.00312677
2.8.0	10-5-2-1_113pg_Set 1 Amp 1_rep-88110	4	55123415	63288.3	0.768777	1.02247	40	30	22	14	37.5384	27.9547	21.0745	13.4324	2.82994	Back Stutter	10.9487	Forward Stutter	7.14267	85	0.102037	0.0690138	0.0487194	0.0354091	0.00362688	0.00316176	0.00288846	0.00346781
2.8.0	10-5-2-1_113pg_Set 1 Amp 1_rep-337491	4	55337835	36565.1	0.859892	1.01368	40	30	22	14	37.498	28.0066	21.1251	13.3703	2.76444	Back Stutter	10.808	Forward Stutter	6.85451	85	0.101666	0.0658848	0.050217	0.0361643	0.00361709	0.00295588	0.00299842	0.00360923
2.8.0	10-5-2-1_113pg_Set 1 Amp 1_rep-630900	4	54904433	40099.2	0.531956	1.01569	40	30	23	15	37.3825	27.8948	21.1433	13.5794	2.79316	Back Stutter	9.78585	Forward Stutter	7.61506	85	0.107165	0.0694489	0.0521292	0.0337626	0.00380925	0.00310099	0.0030601	0.00311304
2.8.0	10-5-2-1_113pg_Set 1 Amp 1_rep-738853	4	54578790	51857.5	0.604826	1.01613	40	29	22	14	37.6347	28.0214	21.0111	13.3328	2.9121	Back Stutter	11.7247	Forward Stutter	6.74869	85	0.0991931	0.0700725	0.0530851	0.0345127	0.00350546	0.00326523	0.00330097	0.00341053
2.8.0	10-5-2-1_113pg_Set 1 Amp 1_rep-754321	4	55619366	68063.7	0.51544	1.01338	40	30	23	14	37.3661	27.9606	21.1608	13.5125	2.82044	Back Stutter	11.8526	Forward Stutter	7.03373	85	0.103387	0.0684749	0.048151	0.034795	0.00364986	0.00307626	0.00279061	0.00330575
2.8.0	10-5-2-1_113pg_Set 1 Amp 1_rep-788248	4	56947550	38048.8	0.870077	1.01511	40	30	23	14	37.429	28.0032	21.1565	13.4112	2.82542	Back Stutter	11.4968	Forward Stutter	6.90224	85	0.103056	0.0684962	0.0480325	0.0340952	0.00360996	0.00306246	0.00277115	0.0032363
2.8.0	10-5-2-1_113pg_Set 1 Amp 1_rep-856103	4	55981445	84900	0.683555	1.01434	40	30	22	14	37.5187	27.9707	21.1058	13.4048	2.78319	Back Stutter	11.3119	Forward Stutter	7.43875	85	0.1021	0.0670974	0.0514405	0.0357835	0.00364346	0.00303662	0.00310042	0.00354042
2.8.0	10-5-2-1_113pg_Set 1 Amp 1_rep-934605	4	58668283	38323.9	0.592765	1.00333	39	30	23	14	37.1976	27.9795	21.2427	13.5801	2.75675	Back Stutter	11.1954	Forward Stutter	8.44468	85	0.0975774	0.0658605	0.0485837	0.0353601	0.00341589	0.00293714	0.0028276	0.0033905
2.8.0	10-5-2-1_113pg_Set 1 Amp 2_rep-1839	4	52804995	37913.8	0.325742	1.01186	39	29	21	13	38.3806	28.0854	20.809	12.725	2.8533	Back Stutter	12.1942	Forward Stutter	7.15347	106	0.120448	0.0778836	0.0581751	0.0358988	0.00474728	0.00390188	0.00394364	0.0040036
2.8.0	10-5-2-1_113pg_Set 1 Amp 2_rep-54505	4	51227638	37262.5	0.260228	1.01311	39	28	21	13	38.4916	28.0391	20.733	12.7362	2.81077	Back Stutter	10.7142	Forward Stutter	7.68482	106	0.123918	0.0784558	0.0564871	0.0355174	0.00503424	0.00401044	0.00386282	0.00399932
2.8.0	10-5-2-1_113pg_Set 1 Amp 2_rep-88110	4	52723891	28170.7	0.432056	1.00415	39	29	21	13	38.301	28.0963	20.8078	12.7949	2.83529	Back Stutter	10.2342	Forward Stutter	7.80916	106	0.118035	0.0784507	0.0551689	0.0350347	0.00466913	0.00400075	0.00369529	0.00389171
2.8.0	10-5-2-1_113pg_Set 1 Amp 2_rep-337491	4	52913505	47926	0.352513	1.01398	39	29	21	13	38.2657	28.0581	20.8426	12.8336	2.74576	Back Stutter	10.7596	Forward Stutter	7.19674	106	0.1237	0.0795945	0.0550469	0.0357638	0.0050126	0.00405904	0.00364019	0.00395103
2.8.0	10-5-2-1_113pg_Set 1 Amp 2_rep-630900	4	52112447	23077.7	0.446118	1.00636	40	29	21	13	38.4624	28.0342	20.7498	12.7536	2.83742	Back Stutter	10.0834	Forward Stutter	6.66128	106	0.125973	0.0796349	0.0557233	0.0359466	0.00506927	0.00402869	0.00369382	0.0039839
2.8.0	10-5-2-1_113pg_Set 1 Amp 2_rep-738853	4	52872266	36013.2	0.354426	1.00884	39	29	21	13	38.3873	28.0639	20.7784	12.7704	2.76978	Back Stutter	10.7037	Forward Stutter	7.11707	106	0.120964	0.0778209	0.0550906	0.0353534	0.00480819	0.00392365	0.00367441	0.00392709
2.8.0	10-5-2-1_113pg_Set 1 Amp 2_rep-754321	4	52507854	27806.7	0.512646	1.01137	39	29	21	13	38.3318	28.0829	20.7965	12.7888	2.69291	Back Stutter	11.4021	Forward Stutter	8.16302	106	0.12384	0.0776548	0.0564182	0.0362336	0.00498062	0.00388232	0.00377686	0.00404133
2.8.0	10-5-2-1_113pg_Set 1 Amp 2_rep-788248	4	51817196	32271.8	0.357552	1.00707	39	28	21	13	38.4366	28.0809	20.7664	12.716	2.79799	Back Stutter	10.4574	Forward Stutter	7.77346	106	0.120153	0.078299	0.0544439	0.0344445	0.00486449	0.00405348	0.00368881	0.00389368
2.8.0	10-5-2-1_113pg_Set 1 Amp 2_rep-856103	4	53094635	38302.5	0.335842	1.00605	39	28	21	13	38.3167	28.0993	20.8142	12.7699	2.75701	Back Stutter	11.6756	Forward Stutter	7.34444	106	0.117656	0.0780759	0.05732	0.0349226	0.00467351	0.00398407	0.00392848	0.00392061
[truncated: 301 more rows]

## Sheet: Inhibited
STRmix version	Sample ID	NoC	Total iterations	ESS	Average loglik.	Gelman Rubin	DNA amount 1	DNA amount 2	DNA amount 3	DNA amount 4	Mixture proportion 1	Mixture proportion 2	Mixture proportion 3	Mixture proportion 4	Kit 1 post. allelic variance	Kit 1 gen.stutter 1 name	Kit 1 gen.stutter 1 post. variance	Kit 1 gen.stutter 2 name	Kit 1 gen.stutter 2 post. variance	Kit 1 deg starting	Kit 1 post. deg. lin. appr. 1	Kit 1 post. deg. lin. appr. 2	Kit 1 post. deg. lin. appr. 3	Kit 1 post. deg. lin. appr. 4	Kit 1 post. deg. d param. 1	Kit 1 post. deg. d param. 2	Kit 1 post. deg. d param. 3	Kit 1 post. deg. d param. 4
[truncated: 60 more rows]

[truncated: 4 more sheets: Underestimated NOC, Degraded, Saturated, Cell lines]
